# Supplementary material
Source: publisher figshare collection journal article supplement (https://gsajournals.figshare.com/ndownloader/files/15139667)
Supplement: Supplementary file 1 [file 15139667]

## Sheet: all_snps_transposed
marker_name	chromosome_Gmax2.0	physical_position_Gmax2.0	G13-2304R2	G13-2307R2	G13-2312R2	G13-2314R2	G13-2315R2	G13-2322R2	G13-2324R2	G13-2335R2	G13-2346R2	G13-2350R2	G13-2351R2	G13-2353R2	G13-2355R2	G13-2361R2	G13-2366R2	G13-2368R2	G13-2372R2	G13-2375R2	G13-2376R2	G13-2377R2	G13-2378R2	G13-2379R2	G13-2384R2	G13-2385R2	G13-2387R2	G13-2389R2	G13-2390R2	G13-2394R2	G13-2400R2	G13-2401R2	G13-2405R2	G13-2407R2	G13-2412R2	G13-2414R2	G13-2418R2	G13-2421R2	G13-2435R2	G13-2449R2	G13-2451R2	G13-2453R2	G13-2454R2	G13-2463R2	G13-2469R2	G13-2471R2	G13-2473R2	G13-2476R2	G13-2484R2
Gm01_138835_A_G	Gm01	138690	GG	AA	GG	AA	AG	AA	AA	AA	AA	AA	AA	AA	GG	AA	GG	AA	AG	AA	AG	GG	AA	GG	GG	AA	AA	AA	GG	GG	GG	AA	AA	AA	AA	AA	AA	AA	AA	AA	GG	AA	AA	AA	--	--	AG	AA	GG
Gm01_281790_T_C	Gm01	281645	CC	CC	CC	CC	CC	CC	CC	CC	CC	CC	CC	CC	CC	CC	CC	CC	CC	CC	CC	CC	CC	CC	CC	CC	CC	CC	CC	CC	CC	CC	--	CC	CC	CC	CC	CC	CC	CC	CC	CC	CC	CC	CC	CC	CC	CC	CC
Gm01_402061_A_C	Gm01	401923	AA	CC	AA	CC	--	CC	CC	CC	CC	CC	CC	--	AA	CC	AA	CC	--	CC	AC	AA	CC	AA	--	CC	CC	CC	AA	AA	AA	CC	CC	CC	CC	CC	CC	CC	CC	CC	AA	CC	CC	CC	AC	--	AC	CC	AA
Gm01_565991_A_C	Gm01	566240	AA	AA	AA	AC	--	CC	--	--	CC	AC	CC	AC	AA	CC	AA	AC	--	AC	--	AA	CC	AA	AA	--	CC	AC	AA	AA	AA	CC	AC	CC	CC	CC	CC	CC	CC	CC	AA	CC	CC	CC	--	AC	--	CC	AA
Gm01_688663_A_G	Gm01	688904	AA	AA	AA	GG	AG	GG	GG	GG	GG	GG	GG	--	AA	GG	AA	GG	AG	GG	GG	AA	GG	AA	--	GG	GG	GG	AA	AA	AA	GG	GG	GG	GG	GG	GG	GG	GG	GG	AA	GG	GG	GG	--	GG	AG	GG	AA
Gm01_901691_C_T	Gm01	901990	CC	CC	CC	TT	CC	TT	TT	TT	TT	TT	CC	--	CC	TT	CC	TT	TC	TT	TT	CC	TT	CC	CC	TT	TT	TT	CC	CC	TT	TT	TT	TT	TT	TT	TT	TT	TT	TT	CC	TT	TT	TT	TC	TT	TC	TT	CC
Gm01_963847_T_C	Gm01	964146	TT	TT	TT	TT	TT	TT	TT	TT	TT	TT	TT	TT	TT	TT	TT	TT	TT	TT	TT	TT	TT	TT	TT	TT	TT	TT	TT	TT	TT	TT	TT	TT	TT	TT	TT	TT	TT	TT	TT	TT	TT	TT	TT	TT	TT	TT	TT
Gm01_1013695_A_G	Gm01	1013994	GG	GG	GG	AA	GG	AA	AA	AA	AA	AA	GG	AA	GG	AA	GG	AA	GG	AA	AA	GG	AA	GG	GG	AA	AA	AA	GG	GG	AA	AA	AA	AA	AA	AA	AA	AA	AA	AA	GG	AA	AA	AA	AG	AA	AG	AA	GG
Gm01_1059407_T_C	Gm01	1059707	CC	CC	CC	CC	CC	CC	CC	CC	CC	CC	CC	CC	CC	CC	CC	CC	CC	CC	CC	CC	CC	CC	CC	CC	CC	CC	CC	CC	CC	CC	CC	CC	CC	CC	CC	CC	CC	CC	CC	CC	CC	CC	CC	CC	CC	CC	CC
Gm01_1279146_C_T	Gm01	1273914	CC	CC	TC	TT	CC	TT	TT	TT	TT	TT	CC	TT	CC	TT	CC	TT	CC	TT	TT	CC	TT	CC	CC	TT	TT	TT	CC	CC	TT	TT	TT	TT	TT	TT	TT	TT	TT	CC	CC	TT	TT	TT	TC	TT	--	TT	CC
Gm01_1344976_A_G	Gm01	1339744	AA	AA	AA	AA	AA	AA	AA	AA	AA	AA	AA	AA	AA	AA	AA	AA	AA	AA	AA	AA	AA	AA	AA	AA	AA	AA	AA	AA	AA	AA	AA	AA	AA	AA	AA	AA	AA	AA	AA	AA	AA	AA	AA	AA	AA	AA	AA
Gm01_1502816_G_A	Gm01	1498823	AA	AA	AA	AA	AA	AA	AA	AA	AA	AA	AA	AA	AA	AA	AA	AA	AA	AA	AA	AA	AA	AA	AA	AA	AA	AA	AA	AA	AA	AA	AG	AA	AA	AA	AA	AA	AA	AA	AA	AA	AA	AA	AA	AA	AA	AA	AA
Gm01_1653315_T_C	Gm01	1653600	CC	CC	CC	CC	CC	CC	CC	CC	CC	CC	CC	CC	CC	CC	CC	CC	CC	CC	CC	CC	CC	CC	CC	CC	CC	CC	CC	CC	CC	CC	CC	CC	CC	CC	CC	CC	CC	CC	CC	CC	CC	CC	CC	CC	CC	CC	CC
Gm01_1795962_A_G	Gm01	1796956	GG	GG	GG	AA	GG	AA	AA	GG	AA	AA	GG	AA	GG	AA	GG	AA	GG	AA	AA	GG	AA	GG	GG	AA	AA	AA	GG	AA	AA	AA	AA	AA	AA	AA	AA	AA	AA	GG	GG	AA	AA	AA	AG	AA	AG	AA	GG
Gm01_2099803_A_G	Gm01	2102513	AA	AA	AA	GG	GG	GG	GG	AA	GG	GG	GG	GG	AA	GG	AA	GG	AA	GG	GG	AA	GG	AA	AA	GG	GG	GG	AA	GG	GG	GG	GG	GG	GG	GG	GG	GG	GG	AA	AA	GG	GG	GG	AG	GG	AG	GG	AA
Gm01_2708722_C_T	Gm01	2724688	CC	CC	CC	TT	TT	TT	CC	CC	TT	TC	TT	TT	TT	TT	CC	TC	CC	TC	TC	CC	TT	CC	TC	TT	TT	TT	CC	TT	--	TT	TC	TT	TT	TT	TT	TT	TT	CC	CC	TT	TT	CC	TC	TC	--	TT	CC
Gm01_2813785_C_T	Gm01	2829751	TT	TT	TT	TT	TT	TT	TT	TT	TT	TT	TT	TT	TT	TT	TT	TT	TT	TT	TT	TT	TT	TT	TT	TT	TT	TT	TT	TT	TT	TT	TC	TT	TT	TT	TT	TT	TT	TT	TT	TT	TT	TT	TT	TT	TT	TT	TT
Gm01_3372977_A_C	Gm01	3387651	AA	--	CC	AA	AA	AA	AA	CC	AA	AA	AA	AA	AA	AA	AA	AA	CC	AA	--	--	CC	CC	AC	AA	AA	AA	AA	AA	AC	AA	AC	CC	AA	AA	AA	AA	AA	AA	AA	AA	AA	CC	AA	--	AA	AA	AA
Gm01_3458582_T_C	Gm01	3458900	CC	TC	TT	CC	CC	CC	CC	TT	CC	CC	CC	CC	CC	CC	CC	CC	TT	CC	CC	TC	TT	TT	CC	CC	CC	CC	CC	CC	TC	CC	CC	TT	CC	CC	CC	CC	CC	CC	CC	CC	CC	TT	CC	CC	CC	CC	CC
Gm01_3585713_C_A	Gm01	3597388	AA	AC	CC	AA	AA	AA	AA	CC	AA	AA	AA	AA	AA	AA	AA	AA	CC	AA	AA	AC	CC	CC	AA	AA	AA	AA	AA	AA	AC	AA	AA	CC	AA	AA	AA	AA	AA	AA	AA	AA	AA	CC	AA	AA	AA	AA	AA
Gm01_3596804_A_C	Gm01	3608479	AA	AA	AA	AA	AA	AA	AA	AA	AA	AA	AA	AA	AA	AA	AA	AA	AA	AA	AA	AA	AA	AA	AA	AA	AA	AA	AA	AA	AA	AA	AA	AA	AA	AA	AA	AA	AA	AA	AA	AA	AA	AA	AA	AA	AA	AA	AA
Gm01_3638269_G_A	Gm01	3649944	AA	--	GG	AA	AA	AA	AA	GG	AA	AA	AA	AA	AA	AA	AA	AA	GG	AA	--	AG	GG	GG	AG	AA	AA	AA	AA	AA	--	AA	AA	GG	AA	AA	AA	AA	AA	AA	AA	AA	AA	GG	AA	--	AA	AA	AA
Gm01_3770764_A_C	Gm01	3791530	CC	--	AC	CC	CC	CC	CC	--	CC	CC	CC	CC	CC	CC	CC	CC	--	CC	CC	--	--	AC	CC	CC	CC	CC	CC	CC	--	CC	CC	--	CC	CC	CC	CC	CC	CC	CC	CC	CC	AC	CC	CC	CC	CC	CC
Gm01_3832790_G_T	Gm01	3853942	TT	TG	GG	TT	TT	TT	TT	GG	TT	TT	TT	TT	TT	TT	TT	TT	GG	TT	TT	TG	GG	GG	TT	TT	TT	TT	TT	TT	TG	TT	TT	GG	TT	TT	TT	TT	TT	TT	TT	TT	TT	GG	TT	TT	TT	TT	TT
Gm01_3905200_A_G	Gm01	3926357	AA	AA	AA	AA	AA	AA	AA	AA	AA	AA	AA	AA	AA	AA	AA	AA	AA	AA	AA	AA	AA	AA	--	AA	AA	AA	AA	AA	AA	AA	AG	AA	AA	AA	AA	AA	AA	AA	AA	AA	AA	AA	AA	AA	AA	AA	AA
Gm01_4002275_A_G	Gm01	4023442	GG	GG	GG	GG	GG	GG	GG	GG	GG	GG	GG	GG	GG	GG	GG	GG	GG	GG	GG	GG	GG	GG	GG	GG	GG	GG	GG	GG	GG	GG	GG	GG	GG	GG	GG	GG	GG	GG	GG	GG	GG	GG	GG	GG	GG	GG	GG
Gm01_4120447_C_T	Gm01	4142416	TT	TC	CC	TT	TT	TT	TT	CC	TT	TT	TT	TT	TT	TT	TT	TT	CC	TT	TT	TC	CC	CC	TT	TT	TT	TT	TT	TT	TC	TT	TT	CC	TT	TT	TT	TT	TT	TT	TT	TT	TT	TT	TT	TT	TT	TT	TT
Gm01_4264556_A_G	Gm01	4286525	GG	--	AA	GG	GG	GG	GG	AA	GG	GG	GG	GG	GG	GG	GG	GG	AA	GG	GG	AG	AA	AA	GG	GG	GG	GG	GG	GG	AG	GG	GG	AA	GG	GG	GG	GG	AA	GG	GG	GG	GG	GG	GG	GG	GG	AA	GG
Gm01_4365237_T_C	Gm01	4387206	CC	TC	TT	CC	CC	CC	CC	TT	CC	CC	CC	CC	CC	CC	CC	CC	CC	CC	CC	TC	TT	TT	CC	CC	CC	CC	CC	CC	TC	CC	CC	TT	CC	CC	CC	CC	TT	CC	CC	CC	CC	CC	CC	CC	CC	TT	CC
Gm01_4642545_A_G	Gm01	4664561	AA	AG	GG	AA	AA	AA	AA	GG	AA	AA	AA	AA	AA	AA	AA	AA	AA	AA	AA	AG	GG	GG	AA	AA	AA	AA	AA	AA	--	AA	AA	AA	AA	AA	AA	AA	GG	AA	AA	AA	AA	AA	AA	AA	AA	GG	AA
Gm01_8484147_T_C	Gm01	8533425	TT	TT	TT	TT	TT	TT	TT	TT	TT	TT	TT	TT	TT	TT	TT	TT	TT	TT	TT	TT	TT	TT	TT	TT	TT	TT	TT	TT	TT	TT	TT	TT	TT	TT	TT	TT	TT	TT	TT	TT	TT	TT	TT	TT	TT	TT	TT
Gm01_32899706_A_G	Gm01	34197502	AG	GG	GG	GG	GG	GG	GG	GG	GG	GG	GG	GG	GG	GG	GG	GG	GG	GG	GG	GG	--	GG	GG	GG	GG	GG	GG	GG	GG	GG	GG	GG	GG	GG	GG	GG	GG	GG	GG	GG	GG	GG	GG	GG	GG	GG	GG
Gm01_33891376_A_G	Gm01	35249061	AG	GG	GG	GG	GG	GG	GG	GG	GG	GG	GG	GG	GG	GG	GG	GG	GG	GG	GG	GG	AG	GG	GG	GG	GG	GG	GG	GG	GG	GG	GG	GG	GG	GG	GG	GG	GG	GG	GG	GG	GG	GG	GG	GG	GG	GG	GG
Gm01_47130768_A_G	Gm01	48006295	AG	AA	GG	AA	AA	AA	AA	AA	AA	AA	AA	--	GG	AA	GG	AA	AA	AA	AA	GG	AA	GG	AG	AG	GG	AA	AA	GG	AA	AA	AA	AA	AA	AA	AA	AA	GG	AA	AA	AA	AA	AA	AA	AA	AA	GG	AA
Gm01_47342247_A_G	Gm01	48216978	--	AA	GG	AA	AA	AA	AA	AA	AA	AA	AA	AA	GG	AA	GG	AA	AA	AA	AA	GG	AA	GG	--	AG	GG	AA	AA	GG	AA	AA	AA	AA	AA	AA	AA	AA	GG	AA	AA	AA	AA	AA	AA	AA	AA	GG	AA
Gm01_47734651_C_A	Gm01	48609048	AC	CC	AA	CC	CC	CC	CC	CC	CC	CC	CC	CC	AA	CC	AA	CC	CC	CC	CC	AA	CC	AA	AC	AC	AA	CC	CC	AA	CC	CC	CC	CC	CC	CC	CC	CC	AA	CC	CC	CC	CC	CC	CC	CC	CC	AA	CC
Gm01_47807975_G_A	Gm01	48682524	GG	GG	--	GG	GG	GG	GG	GG	GG	GG	GG	GG	AA	GG	AA	GG	GG	GG	GG	AA	GG	AG	GG	--	AA	GG	GG	AA	GG	GG	GG	GG	GG	GG	GG	GG	AA	GG	GG	GG	GG	GG	GG	GG	GG	AA	GG
Gm01_48222840_C_T	Gm01	49097595	CC	CC	TT	CC	CC	CC	CC	CC	CC	CC	CC	CC	TT	CC	TT	CC	CC	CC	CC	TT	CC	--	CC	--	TT	CC	CC	TT	CC	CC	CC	CC	CC	CC	CC	CC	TT	CC	CC	CC	CC	CC	CC	CC	CC	TT	CC
Gm01_48524758_C_T	Gm01	49405022	CC	CC	TT	CC	CC	CC	CC	CC	CC	CC	CC	CC	TT	CC	TT	CC	CC	CC	CC	TT	CC	TT	CC	TT	TT	CC	CC	TT	CC	CC	CC	CC	CC	CC	CC	CC	TT	CC	CC	CC	CC	CC	CC	CC	CC	TT	CC
Gm01_48617111_G_A	Gm01	49497388	AA	AA	--	AA	AA	AA	AA	AA	AA	AA	AA	AA	GG	AA	GG	AA	AA	AA	AA	GG	AA	--	AA	GG	GG	AA	AA	GG	AA	AA	AA	AA	AA	AA	--	AA	GG	AA	AA	AA	AA	AA	AA	AA	AA	GG	AA
Gm01_48684218_C_T	Gm01	49564591	--	CC	--	TT	TT	--	TT	TT	TT	TT	TT	TC	CC	TT	CC	TT	TT	TT	TT	CC	TT	--	--	CC	CC	TT	TT	CC	TT	TT	TT	TT	TT	TT	TC	--	CC	TT	TT	TT	TT	TT	TT	TT	TT	CC	TT
Gm01_48740400_G_A	Gm01	49620773	AA	GG	GG	AA	AA	AA	AA	AA	AA	AA	AA	AA	GG	AA	GG	AA	AA	AA	AA	GG	AA	GG	AA	GG	GG	AA	AA	GG	AA	AA	AA	AA	AA	AA	AG	AA	GG	AA	AA	AA	AA	AA	AA	AA	AA	GG	AA
Gm01_48860794_C_T	Gm01	49741168	TT	CC	CC	TT	TT	TT	TT	TT	TT	TT	TT	--	CC	TT	CC	TT	TT	TT	TT	CC	TT	CC	TT	CC	CC	TT	TT	CC	TT	TT	TT	TT	TT	TT	TC	TT	CC	TT	TT	TT	TT	TT	TT	TT	TT	CC	TT
Gm01_49029066_T_G	Gm01	49910518	GG	TG	TG	GG	GG	GG	GG	GG	GG	GG	GG	GG	--	GG	TG	GG	GG	GG	GG	TG	GG	--	GG	TG	TG	GG	GG	TG	GG	GG	GG	GG	GG	GG	--	GG	--	GG	GG	GG	GG	GG	GG	GG	GG	TG	GG
Gm01_49196746_A_G	Gm01	50078206	GG	GG	GG	GG	GG	GG	GG	GG	GG	GG	GG	GG	GG	GG	GG	GG	GG	GG	GG	GG	GG	GG	GG	GG	GG	GG	GG	GG	GG	GG	GG	GG	GG	GG	GG	GG	GG	GG	GG	GG	GG	GG	GG	GG	GG	GG	GG
Gm01_49281276_T_G	Gm01	50164447	GG	GG	GG	GG	GG	GG	GG	GG	GG	GG	GG	GG	GG	GG	GG	GG	GG	GG	GG	GG	GG	GG	GG	GG	GG	GG	GG	GG	GG	GG	GG	GG	GG	GG	GG	GG	GG	GG	GG	GG	GG	GG	GG	GG	GG	GG	GG
Gm01_49322760_C_A	Gm01	50206347	AA	AA	AA	AA	AA	AA	AA	AA	AA	AA	AA	AA	AA	AA	AA	AA	AA	AA	AA	AA	AA	AA	AA	AA	AA	AA	AA	AA	AA	AA	AA	AA	AA	AA	AA	AA	AA	AA	AA	AA	AA	AA	AA	AA	AA	AA	AA
Gm01_49403702_A_G	Gm01	50287274	GG	GG	GG	GG	GG	GG	GG	GG	GG	GG	GG	GG	GG	GG	GG	GG	GG	GG	GG	GG	GG	GG	GG	GG	GG	GG	GG	GG	GG	GG	GG	GG	GG	GG	GG	GG	GG	GG	GG	GG	GG	GG	GG	GG	GG	GG	GG
Gm01_49412063_T_G	Gm01	50295635	GG	GG	GG	GG	GG	GG	GG	GG	GG	GG	GG	GG	GG	GG	GG	GG	GG	GG	GG	GG	GG	GG	GG	GG	GG	GG	GG	GG	GG	GG	GG	GG	GG	GG	GG	GG	GG	GG	GG	GG	GG	GG	GG	GG	GG	GG	GG
Gm01_49566893_G_T	Gm01	50451035	TT	GG	GG	TT	TT	TT	TT	GG	TT	TT	TT	--	GG	TT	GG	TT	TT	TT	TT	GG	GG	GG	TT	GG	TT	TT	TT	GG	TT	TT	TT	TT	TT	TT	TG	TT	GG	TT	TT	TT	TT	TG	TT	TT	TT	GG	TT
Gm01_49687691_C_T	Gm01	50572171	TT	TT	TT	TT	TT	TT	TT	TT	TT	TT	TT	TT	TT	TT	TT	TT	TT	TT	TT	TT	TT	TT	TT	TT	TT	TT	TT	TT	TT	TT	TT	TT	TT	TT	TT	TT	TT	TT	TT	TT	TT	TT	TT	TT	TT	TT	TT
Gm01_49770288_T_C	Gm01	50654766	CC	CC	CC	CC	CC	CC	CC	CC	CC	CC	CC	CC	CC	CC	CC	CC	CC	CC	CC	CC	CC	CC	CC	CC	CC	CC	CC	CC	CC	CC	CC	CC	CC	CC	CC	CC	CC	CC	CC	CC	CC	CC	CC	CC	CC	CC	CC
Gm01_49912586_C_A	Gm01	50797061	AA	AA	AA	AA	AA	AA	AA	AA	AA	AA	AA	AA	AA	AA	AA	AA	AA	AA	AA	AA	AA	AA	AA	AA	AA	AA	AA	AA	AA	AA	AA	AA	AA	AA	AA	AA	AA	AA	AA	AA	AA	AA	AA	AA	AA	AA	AA
Gm01_49987647_C_T	Gm01	50871946	CC	TT	--	CC	CC	CC	CC	--	CC	CC	CC	CC	TT	CC	TT	CC	CC	--	CC	TT	TT	--	--	TT	TT	CC	CC	TT	CC	CC	--	CC	CC	CC	TT	CC	TT	CC	CC	CC	CC	TC	CC	--	CC	TT	CC
Gm01_50098348_G_T	Gm01	50982643	GG	TT	--	GG	GG	GG	GG	--	GG	GG	GG	GG	TT	GG	TT	GG	GG	TG	GG	TT	TT	TG	GG	TT	TT	GG	GG	TT	GG	GG	GG	GG	GG	GG	TT	GG	TT	GG	GG	GG	GG	--	GG	GG	GG	TT	GG
Gm01_50202416_C_T	Gm01	51087595	CC	TT	TT	CC	CC	CC	CC	TT	CC	CC	CC	CC	TT	CC	TT	CC	CC	TT	CC	TT	TT	TT	CC	TT	TT	CC	CC	TT	CC	TT	CC	CC	CC	CC	TT	CC	TT	CC	CC	CC	CC	TC	CC	CC	CC	TT	CC
Gm01_50262496_T_C	Gm01	51147675	CC	CC	CC	CC	CC	CC	CC	CC	CC	CC	CC	CC	CC	CC	CC	CC	CC	CC	CC	CC	CC	CC	CC	CC	CC	CC	CC	CC	CC	CC	CC	CC	CC	CC	CC	CC	CC	CC	CC	CC	CC	CC	CC	CC	CC	CC	CC
Gm01_50318073_A_G	Gm01	51203252	AA	GG	GG	AA	AA	AA	AA	GG	AA	AA	AA	AG	GG	AA	GG	AA	AA	GG	AA	GG	GG	GG	AG	GG	GG	AA	AA	GG	--	GG	AG	AA	AA	AA	GG	--	GG	AA	AA	AA	AG	AG	AA	AG	AA	GG	AA
Gm01_50423856_A_C	Gm01	51309036	CC	AC	AC	CC	CC	CC	CC	AC	CC	CC	CC	CC	--	CC	--	CC	CC	AC	CC	AC	AC	AC	CC	AC	AC	CC	CC	--	CC	--	CC	CC	CC	CC	AC	CC	--	CC	CC	CC	--	--	CC	CC	CC	--	CC
Gm01_50507289_A_G	Gm01	51392814	GG	GG	GG	GG	GG	GG	GG	GG	GG	GG	GG	GG	GG	GG	GG	GG	GG	GG	GG	GG	GG	GG	GG	GG	GG	GG	GG	GG	GG	GG	GG	GG	GG	GG	GG	GG	GG	GG	GG	GG	GG	GG	GG	GG	GG	GG	GG
Gm01_50644671_A_C	Gm01	51530195	CC	CC	CC	CC	CC	CC	CC	CC	AA	CC	CC	CC	CC	CC	CC	CC	AA	CC	CC	CC	CC	CC	CC	CC	CC	CC	CC	CC	CC	CC	CC	AA	AA	CC	CC	CC	CC	CC	CC	CC	CC	CC	CC	--	CC	CC	CC
Gm01_50744456_A_C	Gm01	51629974	CC	CC	CC	CC	CC	CC	CC	CC	AA	CC	CC	CC	CC	CC	CC	CC	AA	CC	CC	CC	CC	CC	CC	CC	CC	CC	CC	CC	CC	CC	CC	AA	AA	CC	CC	CC	CC	CC	CC	CC	CC	CC	CC	AC	CC	CC	CC
Gm01_50889550_T_C	Gm01	51774753	CC	CC	CC	CC	CC	CC	CC	CC	TT	CC	CC	CC	CC	CC	CC	CC	TT	CC	CC	CC	CC	CC	CC	CC	CC	CC	CC	CC	CC	CC	CC	TT	TT	CC	CC	CC	CC	CC	CC	CC	CC	CC	CC	--	CC	CC	CC
Gm01_51034693_A_C	Gm01	51921479	CC	CC	CC	CC	CC	CC	CC	CC	AA	CC	CC	CC	CC	CC	CC	CC	AA	CC	CC	CC	CC	CC	CC	CC	CC	CC	CC	CC	CC	CC	CC	AA	AA	CC	CC	CC	CC	CC	CC	CC	CC	CC	CC	--	CC	CC	CC
Gm01_51831718_G_A	Gm01	52718978	AA	AA	AA	AA	AA	AA	AA	AA	AA	AA	AA	AA	AA	AA	AA	AA	AA	AA	AA	AA	AA	AA	AA	AA	AA	AA	AA	AA	AA	AA	AG	AA	AA	AA	AA	AA	AA	AA	AA	AA	AA	AA	AA	AG	AA	AA	AA
Gm01_51890126_A_G	Gm01	52777403	GG	GG	GG	GG	GG	GG	GG	GG	GG	GG	GG	GG	GG	GG	GG	GG	GG	GG	GG	GG	GG	GG	GG	GG	GG	GG	GG	GG	GG	GG	AG	GG	GG	GG	GG	GG	GG	GG	GG	GG	GG	GG	GG	AG	GG	GG	GG
Gm01_52102056_T_C	Gm01	52989334	CC	CC	CC	CC	TT	--	TC	CC	CC	TT	CC	TC	CC	TT	CC	TT	CC	CC	TT	CC	CC	CC	TT	CC	--	TT	TT	CC	TT	CC	CC	CC	CC	CC	CC	TT	TT	CC	TT	CC	TT	TC	TT	--	TT	TT	--
Gm01_52154366_A_G	Gm01	53041644	AG	GG	--	GG	AA	--	AG	GG	GG	AA	GG	AA	GG	AA	GG	AA	GG	GG	AA	GG	GG	GG	--	GG	AG	AA	AA	GG	AA	GG	GG	GG	GG	GG	GG	AA	AA	GG	AA	GG	--	--	AA	AG	AA	AA	--
Gm01_52253980_C_T	Gm01	53141084	TC	CC	--	CC	TT	--	TC	CC	CC	TT	CC	TT	CC	TT	CC	TT	CC	CC	TT	CC	CC	CC	--	CC	TC	TT	TT	CC	TT	CC	CC	CC	CC	CC	CC	TT	TT	CC	TT	CC	TT	--	TT	TC	TT	TT	--
Gm01_52642507_T_G	Gm01	53527381	--	GG	GG	GG	TT	--	--	GG	GG	TT	GG	TT	GG	TT	GG	TT	GG	GG	--	GG	GG	GG	TG	GG	GG	TT	TT	GG	TT	GG	GG	GG	GG	GG	GG	TT	TT	GG	--	GG	TG	--	TT	--	TT	TT	TG
Gm01_52887948_A_G	Gm01	53772821	--	AA	--	AA	GG	--	AG	AA	AA	GG	AA	GG	AA	GG	AA	GG	GG	AA	GG	AA	AA	--	GG	GG	AA	GG	GG	AA	GG	AA	AA	GG	GG	AA	AA	GG	GG	AA	GG	AA	GG	GG	GG	GG	GG	GG	--
Gm01_53242363_T_G	Gm01	54127023	TT	TT	TT	TT	TT	--	TT	TT	TT	TT	TT	TT	TT	TT	TT	TT	GG	TT	TT	TT	TT	TT	--	GG	TT	TT	TT	TT	TT	TT	--	TT	GG	TT	TT	TT	TT	TT	TT	TT	TT	TT	TT	TG	TT	TT	TT
Gm01_53278791_G_T	Gm01	54163451	GG	GG	GG	GG	GG	GG	GG	GG	GG	GG	GG	GG	GG	GG	GG	GG	TT	GG	GG	GG	GG	GG	GG	TT	GG	GG	GG	GG	GG	GG	--	GG	TT	GG	GG	GG	GG	GG	GG	GG	GG	GG	GG	--	GG	GG	GG
Gm01_53365928_A_G	Gm01	54250600	AA	AA	AA	AA	AA	AA	AA	AA	AA	AA	AA	AA	AA	AA	AA	AA	GG	AA	AA	AA	AA	AA	--	--	AA	AA	AA	AA	AA	AA	AA	AA	GG	AA	AA	AA	AA	AA	AA	AA	AA	AA	AA	--	AA	AA	AA
Gm01_53675540_T_C	Gm01	54584027	CC	CC	CC	CC	CC	CC	CC	CC	CC	CC	CC	CC	CC	CC	CC	CC	CC	CC	CC	CC	CC	CC	CC	CC	CC	CC	CC	CC	CC	CC	--	CC	CC	CC	CC	CC	CC	CC	CC	CC	CC	CC	CC	CC	CC	CC	CC
Gm01_53900971_G_A	Gm01	54809451	GG	GG	GG	GG	GG	GG	GG	GG	GG	GG	GG	GG	GG	GG	GG	GG	GG	GG	GG	GG	GG	GG	GG	GG	GG	GG	GG	GG	GG	GG	GG	GG	GG	GG	GG	GG	GG	GG	GG	GG	GG	GG	GG	GG	GG	GG	GG
Gm01_54220674_T_C	Gm01	55129174	TT	TT	TT	TT	TT	TT	TT	TT	TT	TT	TT	TT	TT	TT	TT	TT	TT	TT	TT	TT	TT	TT	TT	TT	TT	TT	TT	TT	TT	TT	TT	TT	TT	TT	TT	TT	TT	TT	TT	TT	TT	TT	TT	TC	TT	TT	TT
Gm01_54285824_G_A	Gm01	55194325	GG	GG	GG	GG	GG	GG	GG	GG	--	GG	GG	GG	GG	GG	GG	GG	AA	GG	GG	GG	GG	GG	GG	GG	GG	GG	GG	GG	GG	GG	GG	GG	AA	GG	GG	GG	GG	GG	GG	GG	GG	GG	GG	AG	GG	GG	GG
Gm01_54432202_T_G	Gm01	55348314	TT	TT	TT	TT	TT	TT	TT	TT	TT	TT	TT	TT	TT	TT	TT	TT	TT	TT	TT	TT	TT	TT	TT	TT	TT	TT	TT	TT	TT	TT	TT	TT	TT	TT	TT	TT	TT	TT	TT	TT	TT	TT	TT	TG	TT	TT	TT
Gm01_54488416_C_A	Gm01	55404734	CC	CC	CC	CC	CC	CC	CC	CC	CC	CC	CC	CC	CC	CC	CC	CC	CC	CC	CC	CC	CC	CC	CC	CC	CC	CC	CC	CC	CC	CC	CC	CC	CC	CC	CC	CC	CC	CC	CC	CC	CC	CC	CC	--	CC	CC	CC
Gm01_54622722_C_A	Gm01	55539040	CC	CC	CC	CC	CC	CC	CC	CC	CC	CC	CC	CC	CC	CC	CC	CC	CC	CC	CC	CC	CC	CC	CC	CC	CC	CC	CC	CC	CC	CC	CC	CC	CC	CC	CC	CC	CC	CC	CC	CC	CC	CC	CC	--	CC	CC	CC
Gm01_54686660_C_A	Gm01	55602978	CC	CC	CC	CC	CC	CC	CC	CC	CC	CC	CC	CC	CC	CC	CC	CC	CC	CC	CC	CC	CC	CC	CC	CC	CC	CC	CC	CC	CC	CC	CC	CC	CC	CC	CC	CC	CC	CC	CC	CC	CC	CC	CC	AC	CC	CC	CC
Gm01_54807842_C_A	Gm01	55724571	CC	CC	CC	CC	CC	CC	CC	CC	CC	CC	CC	CC	CC	CC	CC	CC	CC	CC	CC	CC	CC	CC	CC	CC	CC	CC	CC	CC	CC	CC	CC	CC	CC	CC	CC	CC	CC	CC	CC	CC	CC	CC	CC	CC	CC	CC	CC
Gm01_54843428_G_T	Gm01	55760157	GG	GG	GG	GG	GG	GG	GG	GG	GG	GG	GG	GG	GG	GG	GG	GG	GG	GG	GG	GG	GG	GG	GG	GG	GG	GG	GG	GG	GG	GG	GG	GG	GG	GG	GG	GG	GG	GG	GG	GG	GG	GG	GG	GG	GG	GG	GG
Gm01_54932021_T_G	Gm01	55848750	TT	TT	TT	TT	TT	TT	--	TT	GG	TT	TT	TT	TT	TT	TG	TT	GG	TT	TT	TT	--	TT	TG	GG	TT	TT	TT	--	TT	TT	TT	GG	GG	TT	GG	TT	TT	TT	TT	TT	--	TT	--	GG	TT	TT	TT
Gm01_54962372_G_A	Gm01	55879101	GG	GG	GG	GG	GG	GG	GG	GG	AA	GG	GG	GG	GG	GG	GG	GG	AA	GG	GG	GG	GG	GG	GG	AA	GG	GG	GG	GG	GG	GG	GG	AA	AA	GG	AA	GG	GG	GG	GG	GG	GG	GG	GG	--	GG	GG	GG
Gm01_55060537_G_T	Gm01	55976161	GG	GG	GG	GG	GG	GG	GG	GG	TT	GG	GG	GG	GG	GG	GG	GG	TT	GG	GG	GG	GG	GG	GG	TT	GG	GG	GG	GG	GG	GG	GG	TT	TT	GG	TT	GG	GG	GG	GG	GG	GG	GG	GG	TG	GG	GG	GG
Gm01_55124547_G_A	Gm01	56040192	GG	GG	GG	GG	GG	GG	GG	GG	GG	GG	GG	GG	GG	GG	GG	GG	GG	GG	GG	GG	GG	GG	GG	GG	GG	GG	GG	GG	GG	GG	GG	GG	GG	GG	GG	GG	GG	GG	GG	GG	GG	GG	GG	--	GG	GG	GG
Gm01_55226574_A_G	Gm01	56142221	AA	AA	AA	AA	AA	AA	AA	AA	GG	AA	AA	AA	AA	AA	AA	AA	GG	AA	AA	AA	AA	AA	AA	GG	AA	AA	AA	AA	AA	AA	AA	GG	GG	AA	GG	AA	AA	AA	AA	AA	AA	AA	AA	GG	AA	AA	AA
Gm01_55380880_T_C	Gm01	56296878	CC	CC	CC	CC	CC	CC	CC	CC	CC	CC	CC	CC	CC	CC	CC	CC	CC	CC	CC	CC	CC	CC	CC	CC	CC	CC	CC	CC	CC	CC	CC	CC	CC	CC	CC	CC	CC	CC	CC	CC	CC	CC	CC	CC	CC	CC	CC
Gm01_55666300_G_A	Gm01	56582329	AA	AA	AA	AA	AA	AA	AA	AA	GG	AA	AA	AA	AA	AA	AA	AA	AA	AA	AA	AA	AA	AA	AA	GG	AA	AA	AA	AA	AA	AA	AA	GG	GG	AA	GG	AA	AA	AA	AA	AA	AA	AA	AA	AG	AA	AA	AA
Gm01_55789200_A_C	Gm01	56705229	CC	CC	CC	CC	CC	CC	CC	CC	AA	CC	CC	CC	CC	CC	CC	CC	CC	CC	CC	CC	CC	CC	CC	AA	CC	CC	CC	CC	CC	CC	CC	AA	AA	CC	AA	CC	CC	CC	CC	CC	CC	CC	CC	AC	CC	CC	CC
Gm02_51238_A_G	Gm02	51236	GG	AA	GG	AA	GG	AA	AA	AA	AA	GG	GG	AA	AA	AA	AA	GG	AA	GG	AA	AA	GG	AA	GG	AA	GG	AA	GG	GG	GG	GG	GG	AA	AA	GG	AA	GG	GG	GG	--	AA	AA	AA	AA	AA	AA	GG	GG
Gm02_207506_A_G	Gm02	207504	GG	AA	GG	AA	GG	AA	AA	AA	AA	GG	GG	AA	AA	AA	AA	GG	AA	GG	AA	AA	GG	AA	GG	AA	GG	AA	GG	GG	GG	GG	GG	AA	AA	GG	AA	GG	GG	GG	AA	AA	AA	AA	AA	AA	AA	GG	GG
Gm02_447495_G_A	Gm02	447493	AA	AA	AA	AA	AA	AA	AA	AA	AA	AA	AA	AA	AA	AA	AA	AA	AA	AA	AA	AA	AA	AA	AA	AA	AA	AA	AA	AA	AA	AA	AA	AA	AA	AA	AA	AA	AA	AA	AA	AA	AA	AA	AA	AA	AA	AA	AA
Gm02_496816_T_C	Gm02	496814	CC	CC	CC	CC	CC	CC	CC	CC	CC	CC	CC	CC	CC	CC	CC	CC	CC	CC	CC	CC	CC	CC	CC	CC	CC	CC	CC	CC	CC	CC	CC	CC	CC	CC	CC	CC	CC	CC	CC	CC	CC	CC	CC	CC	CC	CC	CC
Gm02_504059_C_A	Gm02	504057	AA	AA	AA	AA	AA	AA	AA	AA	AA	AA	AA	AA	AA	AA	AA	AA	AA	AA	AA	AA	AA	AA	AA	AA	AA	AA	AA	AA	AA	AA	AA	AA	AA	AA	AA	AA	AA	AA	AA	AA	AA	AA	AA	AA	AA	AA	AA
Gm02_831797_C_T	Gm02	831795	--	CC	TT	CC	TT	CC	CC	TT	CC	TT	TT	CC	CC	CC	CC	--	CC	TT	CC	CC	TT	TT	CC	CC	TT	CC	TT	TT	CC	CC	TT	CC	CC	TT	CC	TT	TT	TT	TC	CC	CC	CC	CC	CC	CC	TT	TT
Gm02_971923_C_A	Gm02	971919	AA	CC	CC	CC	AA	CC	CC	AA	CC	AA	AA	CC	CC	CC	CC	CC	CC	AA	CC	CC	AA	AA	CC	CC	AA	CC	AA	AA	CC	CC	AA	CC	CC	CC	CC	CC	AA	AA	CC	CC	CC	CC	CC	CC	CC	AA	AA
Gm02_1033642_T_C	Gm02	1033638	TT	TT	CC	TT	TT	--	TT	TT	TT	TT	TT	TT	TT	TT	TT	CC	TT	TT	TT	TT	TT	TT	TT	TT	TT	TT	TT	TT	TT	TT	--	TT	TT	CC	TT	CC	TT	TT	--	TT	TT	TT	TT	TT	TT	TT	TT
Gm02_1574622_A_C	Gm02	1598551	AA	AA	AA	AA	AA	AA	AA	AA	AA	AA	AA	AA	AA	AA	AA	AA	AA	AA	AA	AA	AA	AA	AA	AA	AA	AA	AA	AA	AA	AA	AA	AA	AA	AA	AA	AA	AA	AA	AA	AA	AA	AA	AA	AA	AA	AA	AA
Gm02_1782296_G_A	Gm02	1806075	GG	GG	GG	GG	GG	GG	GG	GG	GG	GG	GG	GG	GG	GG	GG	GG	GG	GG	GG	GG	GG	GG	GG	GG	GG	GG	GG	GG	GG	GG	GG	GG	GG	GG	GG	GG	GG	GG	GG	GG	GG	GG	GG	GG	GG	GG	GG
Gm02_1830094_T_C	Gm02	1853600	TT	TT	TT	TT	TT	TT	TT	TT	TT	TT	TT	TT	TT	TT	TT	TT	TT	TT	TT	TT	TT	TT	TT	TT	TT	TT	TT	TT	TT	TT	TT	TT	TT	TT	TT	TT	TT	TT	TT	TT	TT	TT	TT	TT	TT	TT	TT
Gm02_1878469_A_G	Gm02	1901965	AA	AA	AA	AA	AA	AA	AA	AA	AA	AA	AA	AA	AA	AA	AA	AA	AA	AA	AA	AA	AA	AA	AA	AA	AA	AA	AA	AA	AA	AA	AA	AA	AA	AA	AA	AA	AA	AA	AA	AA	AA	AA	AA	AA	AA	AA	AA
Gm02_2158660_G_A	Gm02	2189373	AG	GG	AA	GG	AA	AG	GG	--	GG	AA	AA	GG	GG	GG	GG	AG	GG	AA	GG	GG	AA	GG	GG	GG	AA	GG	AA	AA	AA	GG	AA	GG	GG	AA	GG	AA	AA	AG	--	GG	GG	GG	--	GG	GG	AA	AA
Gm02_2246479_A_G	Gm02	2277189	--	AA	GG	AA	GG	--	AA	GG	AA	GG	GG	AA	AA	AA	AA	--	AA	GG	AA	AA	GG	AA	AA	AA	GG	AA	GG	GG	GG	AA	GG	AA	AA	GG	AA	GG	GG	--	--	AA	AA	AA	AA	AA	AA	GG	GG
Gm02_2320070_C_A	Gm02	2350780	AA	CC	AA	CC	AA	--	CC	AA	CC	AA	AA	CC	CC	CC	CC	AA	CC	AA	CC	CC	AA	CC	CC	CC	AA	CC	AA	AA	AA	CC	AA	CC	CC	AA	CC	AA	AA	AA	AC	CC	CC	CC	CC	CC	CC	AA	AA
Gm02_2391001_T_C	Gm02	2421724	TC	TT	CC	TT	CC	TC	TT	CC	TT	CC	CC	TT	TT	TT	TT	CC	TT	CC	TT	TT	CC	TT	TT	TT	CC	TT	CC	CC	CC	TT	CC	TT	TT	CC	TT	CC	CC	TT	CC	TT	TT	TT	TT	TT	TT	CC	CC
Gm02_2467152_C_T	Gm02	2497896	CC	CC	--	CC	CC	TC	CC	CC	CC	CC	CC	CC	CC	CC	CC	--	CC	CC	CC	CC	CC	CC	CC	CC	CC	CC	CC	CC	TC	CC	CC	CC	CC	TT	CC	TT	CC	CC	CC	CC	CC	CC	CC	CC	CC	CC	CC
Gm02_2629337_A_G	Gm02	2676772	--	AA	AG	AA	GG	AA	AA	GG	AA	GG	GG	AA	AA	AA	AA	AG	AA	GG	AA	AA	GG	AA	AA	AA	GG	AA	GG	GG	AG	AA	GG	AA	AA	AA	AA	AA	GG	AA	GG	AA	AA	AA	AG	AG	AA	GG	GG
Gm02_2736727_C_A	Gm02	2784160	AC	CC	CC	CC	AA	CC	CC	AA	CC	AA	AA	CC	CC	CC	CC	CC	CC	AA	CC	CC	AA	CC	CC	CC	AA	CC	AA	AA	CC	CC	AC	CC	CC	CC	CC	CC	AA	CC	AC	CC	CC	CC	CC	CC	CC	AA	AA
Gm02_2885598_C_A	Gm02	2933055	CC	AA	AA	AA	CC	AA	AA	CC	AA	CC	CC	AA	AA	AA	AA	AA	AA	CC	AA	AA	CC	AA	AA	AA	CC	AA	AA	CC	AA	AA	CC	AA	AA	AA	AA	AA	CC	AA	CC	AA	AA	AA	AA	AA	AA	CC	CC
Gm02_2920341_C_T	Gm02	2967798	CC	TT	TC	TT	CC	TT	TT	CC	TT	CC	CC	TT	TT	TT	TT	TC	TT	CC	TT	TT	CC	TT	TT	TT	CC	TT	TT	CC	TC	TT	CC	TT	TT	TT	TT	TT	CC	TT	CC	TT	TT	TT	TT	TC	TT	CC	CC
Gm02_3091665_T_G	Gm02	3142154	TG	GG	TT	GG	TT	TG	GG	--	GG	TG	TT	GG	GG	GG	GG	TT	GG	TT	GG	GG	TT	GG	GG	GG	TT	GG	GG	TT	TT	GG	TG	GG	GG	TT	GG	TT	TT	GG	TT	GG	GG	GG	GG	GG	GG	TT	TT
Gm02_3364524_C_T	Gm02	3415435	CC	TT	TT	TT	CC	TT	TT	CC	TT	CC	CC	TT	TT	TT	TT	TT	TT	CC	TT	TT	CC	TT	TT	TT	CC	TT	TT	CC	TT	TT	CC	TT	TT	TT	CC	TT	CC	TT	CC	TT	TT	TT	TT	TT	TT	CC	CC
Gm02_3429963_G_A	Gm02	3480874	GG	AA	AA	AA	GG	AA	AA	GG	AA	GG	GG	AA	AA	AA	AA	AA	AA	GG	AA	AA	GG	AA	AA	AA	GG	AA	AA	GG	AA	AA	GG	AA	AA	AA	GG	AA	GG	AA	GG	AA	AA	AA	AA	AA	AA	GG	GG
Gm02_3774471_G_A	Gm02	3826362	--	GG	AA	GG	AA	GG	GG	AA	GG	AA	AA	GG	GG	GG	GG	AG	GG	AA	GG	GG	AA	GG	GG	GG	AA	GG	GG	AA	AA	GG	AA	GG	GG	GG	AA	AG	AA	GG	AA	GG	GG	GG	GG	GG	GG	AA	AA
Gm02_3835570_T_C	Gm02	3887461	TT	TT	TT	TT	TT	TT	TT	TT	TT	TT	TT	TT	TT	TT	TT	TT	TT	TT	TT	TT	TT	TT	TT	TT	TT	TT	TT	TT	TT	TT	TC	TT	TT	TT	TT	TT	TT	TT	TT	TT	TT	TT	TT	TT	TT	TT	TT
Gm02_3860736_G_A	Gm02	3912545	AA	AA	AA	AA	AA	AA	AA	AA	AA	AA	AA	AA	AA	AA	AA	AA	AA	AA	AA	AA	AA	AA	AA	AA	AA	AA	AA	AA	AA	AA	AA	AA	AA	AA	AA	AA	AA	AA	AA	AA	AA	AA	AA	AA	AA	AA	AA
Gm02_3906107_A_G	Gm02	3957865	GG	GG	GG	GG	GG	GG	GG	GG	GG	GG	GG	GG	GG	GG	GG	GG	GG	GG	GG	GG	GG	GG	GG	GG	GG	GG	GG	GG	GG	GG	GG	GG	GG	GG	GG	GG	GG	GG	GG	GG	GG	GG	GG	GG	GG	GG	GG
Gm02_3954305_C_T	Gm02	4006063	CC	CC	CC	CC	CC	CC	CC	CC	CC	CC	CC	CC	CC	CC	CC	CC	CC	CC	CC	CC	CC	CC	CC	CC	CC	CC	CC	CC	CC	CC	CC	CC	CC	CC	CC	CC	CC	CC	CC	CC	CC	CC	CC	CC	CC	CC	CC
Gm02_4019916_A_G	Gm02	4071674	--	GG	AA	GG	AA	GG	GG	AA	GG	--	AA	GG	GG	GG	GG	AG	GG	AA	GG	GG	AA	GG	GG	GG	AA	GG	GG	AG	AA	GG	--	GG	GG	GG	AA	AG	AA	GG	AA	GG	GG	GG	GG	--	GG	AA	AA
Gm02_4206514_A_G	Gm02	4258274	GG	AA	GG	AA	GG	AA	AA	GG	AA	GG	GG	AA	AA	AA	AA	--	AA	GG	AA	AA	GG	AA	AA	AA	GG	AA	AA	AG	GG	AA	GG	AA	AA	AA	GG	--	GG	AA	GG	AA	AA	AA	AA	--	AA	GG	GG
Gm02_4283009_G_A	Gm02	4334769	GG	AA	GG	AA	GG	--	--	GG	AA	GG	GG	AA	AA	AA	AA	--	AA	GG	AA	AA	GG	AA	--	AA	GG	GG	AA	AG	GG	AA	GG	AA	AA	AA	GG	--	GG	AA	GG	AA	GG	AA	AA	AG	AA	GG	GG
Gm02_4319761_C_T	Gm02	4371521	CC	TT	CC	TT	CC	--	TT	CC	TT	CC	CC	TT	TT	TT	TT	TC	TT	CC	TT	TT	CC	TT	TT	TT	CC	CC	TT	TC	CC	TT	CC	TT	TT	TT	TT	TC	CC	TT	CC	TT	CC	TT	TT	--	TT	CC	CC
Gm02_4430768_C_T	Gm02	4482526	TT	CC	TT	CC	TT	CC	CC	TT	CC	TT	TT	CC	CC	CC	CC	TC	CC	TT	CC	CC	TT	CC	CC	CC	TT	TT	CC	TC	TT	CC	TT	CC	CC	CC	CC	TC	TT	CC	TT	CC	TT	CC	CC	CC	CC	TT	TT
Gm02_4439399_T_C	Gm02	4491157	--	CC	TT	CC	TT	CC	CC	TT	CC	TT	TT	CC	CC	CC	CC	TC	CC	TT	CC	CC	TT	CC	CC	CC	TT	TT	CC	TC	TT	CC	TT	CC	CC	CC	CC	--	TT	CC	TT	CC	TT	CC	CC	--	CC	TT	TT
Gm02_4487187_A_C	Gm02	4538945	CC	AA	CC	AA	CC	AA	AA	CC	AA	CC	CC	AA	AA	AA	AA	--	AA	CC	AA	AA	CC	AA	AA	AA	CC	CC	AA	AC	CC	AA	CC	AA	AA	AA	AA	--	CC	AA	CC	AA	CC	AA	AA	--	AA	CC	CC
Gm02_4618881_T_C	Gm02	4670640	TT	TT	TT	TT	TT	TT	TT	TT	TT	TT	TT	TT	TT	TT	TT	TT	TT	TT	TT	TT	TT	TT	TT	TT	TT	TT	TT	TT	TT	TT	TT	TT	TT	TT	TT	TT	TT	TT	TT	TT	TT	TT	TT	TT	TT	TT	TT
Gm02_4785649_G_T	Gm02	4845732	GG	TT	GG	TT	GG	TG	--	GG	TT	GG	GG	TT	TT	TT	TT	--	TT	TG	TT	TT	GG	TT	--	TT	GG	GG	TT	GG	GG	TT	GG	TT	TT	TT	TT	--	GG	TT	GG	TT	GG	TT	TT	TG	TT	GG	GG
Gm02_4909353_C_T	Gm02	4969441	CC	CC	CC	CC	CC	CC	CC	CC	CC	CC	CC	CC	CC	CC	CC	CC	CC	CC	CC	CC	CC	CC	CC	CC	CC	CC	CC	CC	CC	CC	CC	CC	CC	CC	CC	CC	CC	CC	CC	CC	CC	CC	CC	CC	CC	CC	CC
Gm02_4957187_A_G	Gm02	5017274	AA	AA	AA	AA	AA	AA	AA	AA	AA	AA	AA	AA	AA	AA	AA	AA	AA	AA	AA	AA	AA	AA	AA	AA	AA	AA	AA	AA	AA	AA	AG	AA	AA	AA	AA	AA	AA	AA	AA	AA	AA	AA	AA	AA	AA	AA	AA
Gm02_5202276_T_C	Gm02	5262408	CC	CC	CC	CC	CC	CC	CC	CC	CC	CC	CC	CC	CC	CC	CC	CC	CC	CC	CC	CC	CC	CC	CC	CC	CC	CC	CC	CC	CC	CC	--	CC	CC	CC	CC	CC	CC	CC	CC	CC	CC	CC	CC	CC	CC	CC	CC
Gm02_5343214_T_C	Gm02	5403335	TT	TT	TT	TT	TT	TT	TT	TT	TT	TT	TT	TT	TT	TT	TT	TT	TT	TT	TT	TT	TT	TT	TT	TT	TT	TT	TT	TT	TT	TT	TC	TT	TT	TT	TT	TT	TT	TT	TT	TT	TT	TT	TT	TT	TT	TT	TT
Gm02_5380722_C_T	Gm02	5440843	TT	TT	TT	TT	TT	TT	TT	TT	TT	TT	TT	TT	TT	TT	TT	TT	TT	TT	TT	TT	TT	TT	TT	TT	TT	TT	TT	TT	TT	TT	TC	TT	TT	TT	TT	TT	TT	TT	TT	TT	TT	TT	TT	TT	TT	TT	TT
Gm02_5809648_C_T	Gm02	5868669	CC	CC	CC	CC	CC	CC	CC	CC	CC	CC	CC	CC	CC	CC	CC	CC	CC	CC	CC	CC	CC	CC	CC	CC	CC	CC	CC	CC	CC	CC	CC	CC	CC	CC	CC	CC	CC	CC	CC	CC	CC	CC	CC	CC	CC	CC	CC
Gm02_5929459_C_T	Gm02	5988587	TT	TT	TT	TT	TT	TT	TT	TT	TT	TT	TT	TT	TT	TT	TT	TT	TT	TT	TT	TT	TT	TT	TT	TT	TT	TT	TT	TT	TT	TT	TC	TT	TT	TT	TT	TT	TT	TT	TT	TT	TT	TT	TT	TT	TT	TT	TT
Gm02_5987005_C_T	Gm02	6046134	TT	TT	TT	TT	TT	TT	TT	TT	TT	TT	TT	TT	TT	TT	TT	TT	TT	TT	TT	TT	TT	TT	TT	TT	TT	TT	TT	TT	TT	TT	TC	TT	TT	TT	TT	TT	TT	TT	TT	TT	TT	TT	TT	TT	TT	TT	TT
Gm02_6180795_T_G	Gm02	6257116	GG	GG	GG	GG	GG	GG	GG	GG	GG	GG	GG	GG	GG	GG	GG	GG	GG	GG	GG	GG	GG	GG	GG	GG	GG	GG	GG	GG	GG	GG	--	GG	GG	GG	GG	GG	GG	GG	GG	GG	GG	GG	GG	GG	GG	GG	GG
Gm02_6225129_T_G	Gm02	6301450	GG	GG	GG	GG	GG	GG	GG	GG	GG	GG	GG	GG	GG	GG	GG	GG	GG	GG	GG	GG	GG	GG	GG	GG	GG	GG	GG	GG	GG	GG	GG	GG	GG	GG	GG	GG	GG	GG	GG	GG	GG	GG	GG	GG	GG	GG	GG
Gm02_6418567_A_G	Gm02	6494883	GG	GG	GG	GG	GG	GG	GG	GG	GG	GG	GG	GG	GG	GG	GG	GG	GG	GG	GG	GG	GG	GG	GG	GG	GG	GG	GG	GG	GG	GG	--	GG	GG	GG	GG	GG	GG	GG	GG	GG	GG	GG	GG	GG	GG	GG	GG
Gm02_6503793_A_G	Gm02	6580109	GG	GG	GG	GG	GG	GG	GG	GG	GG	GG	GG	GG	GG	GG	GG	GG	GG	GG	GG	GG	GG	GG	GG	GG	GG	GG	GG	GG	GG	GG	--	GG	GG	GG	GG	GG	GG	GG	GG	GG	GG	GG	GG	GG	GG	GG	GG
Gm02_6734421_T_C	Gm02	6812100	TT	TT	TT	TT	TT	TT	TT	TT	TT	TT	TT	TT	TT	TT	TT	TT	TT	TT	TT	TT	TT	TT	TT	TT	TT	TT	TT	TT	TT	TT	--	TT	TT	TT	TT	TT	TT	TT	TT	TT	TT	TT	TT	TT	TT	TT	TT
Gm02_6821311_A_C	Gm02	6899003	AA	AA	AA	AA	AA	AA	AA	AA	AA	AA	AA	AA	AA	AA	AA	AA	AA	AA	AA	AA	AA	AA	AA	AA	AA	AA	AA	AA	AA	AA	AC	AA	AA	AA	AA	AA	AA	AA	AA	AA	AA	AA	AA	AA	AA	AA	AA
Gm02_6971683_T_C	Gm02	7050046	--	TT	CC	TT	CC	TT	TT	CC	TT	TT	TT	--	TT	CC	TT	TT	TT	TT	TT	TT	CC	TT	CC	CC	TT	CC	TC	TT	TC	TT	TT	CC	TT	TT	CC	CC	TT	TT	TT	TT	CC	CC	TT	TT	TT	TT	TT
Gm02_7135561_T_C	Gm02	7213937	TC	TT	CC	TT	CC	TT	TT	CC	TT	TT	TT	TT	TT	CC	TT	TT	TT	--	TT	TT	CC	TT	CC	CC	TT	CC	--	TT	--	TT	TT	CC	TT	TT	CC	CC	TT	TT	--	TT	CC	CC	TT	TC	TT	TT	TT
Gm02_7267240_T_G	Gm02	7354703	GG	GG	--	GG	--	GG	GG	TT	GG	GG	GG	GG	GG	TT	GG	GG	GG	GG	GG	GG	--	GG	TG	TT	GG	TT	--	GG	TG	GG	GG	TT	GG	GG	TT	TT	GG	GG	GG	GG	TG	--	GG	GG	GG	GG	GG
Gm02_7333018_A_G	Gm02	7420481	--	GG	AA	GG	AA	GG	GG	AA	GG	GG	GG	GG	GG	AA	GG	GG	GG	GG	GG	GG	AA	GG	--	AA	GG	AA	AG	GG	AG	GG	GG	AA	GG	GG	AA	AA	GG	GG	GG	GG	AA	AA	GG	GG	GG	GG	GG
Gm02_7435044_T_C	Gm02	7522507	--	CC	--	CC	TT	CC	CC	TT	CC	CC	CC	CC	CC	TT	CC	CC	CC	CC	CC	CC	TT	CC	TC	TT	CC	TT	--	CC	TC	CC	CC	TT	CC	CC	TT	TT	CC	CC	CC	CC	TC	--	CC	CC	CC	CC	CC
Gm02_7517197_T_G	Gm02	7599371	TT	TT	TT	TT	TT	TT	TT	TT	TT	TT	TT	TT	TT	TT	TT	TT	TT	TT	TT	TT	TT	TT	TT	TT	TT	TT	TT	TT	TT	TT	TT	TT	TT	TT	TT	TT	TT	TT	TT	TT	TT	TT	TT	TT	TT	TT	TT
Gm02_7590666_T_G	Gm02	7679981	TT	TT	TT	TT	TT	TT	TT	TT	TT	TT	TT	TT	TT	TT	TT	TT	TT	TT	TT	TT	TT	TT	TT	TT	TT	TT	TT	TT	TT	TT	TT	TT	TT	TT	TT	TT	TT	TT	TT	TT	TT	TT	TT	TT	TT	TT	TT
Gm02_7721197_G_A	Gm02	7810442	GG	GG	GG	GG	GG	GG	GG	GG	GG	GG	GG	GG	GG	GG	GG	GG	GG	GG	GG	GG	GG	GG	GG	GG	GG	GG	GG	GG	GG	GG	GG	GG	GG	GG	GG	GG	GG	GG	GG	GG	GG	GG	GG	--	GG	GG	GG
Gm02_7987834_A_G	Gm02	8077372	--	GG	AG	GG	AA	GG	GG	AA	GG	GG	GG	GG	GG	AA	GG	GG	AA	GG	GG	GG	AA	GG	AG	AA	GG	AA	--	GG	--	GG	GG	AA	GG	GG	AA	AA	GG	GG	GG	GG	AG	AG	GG	GG	GG	GG	GG
Gm02_8081081_T_C	Gm02	8170539	TC	CC	TT	CC	TT	CC	CC	TT	CC	CC	CC	CC	CC	TT	CC	CC	TT	CC	CC	CC	TT	CC	TT	TT	CC	TT	TC	CC	--	CC	CC	TT	CC	CC	TT	TT	CC	CC	CC	CC	TT	TT	CC	CC	CC	CC	CC
Gm02_8273157_G_A	Gm02	8362434	AG	AA	GG	AA	GG	AA	AA	GG	AA	AA	AA	AA	AA	GG	AA	AA	GG	AA	AA	AA	GG	AA	GG	GG	AA	GG	AG	AA	AG	AA	AA	GG	AA	AA	GG	GG	AA	AA	AA	AA	GG	GG	AA	AA	AA	AA	AA
Gm02_8341731_C_T	Gm02	8431008	TC	TT	CC	TT	CC	TT	TT	CC	TT	TT	TT	TT	TT	CC	TT	TT	CC	TT	TT	TT	CC	TT	--	CC	TT	CC	TC	TT	--	TT	--	CC	TT	TT	CC	CC	TT	TT	TT	TT	CC	CC	TT	TT	TT	TT	TT
Gm02_8455103_A_G	Gm02	8544380	AA	AA	AA	AA	AA	AA	AA	AA	AA	AA	AA	AA	AA	AA	AA	AA	AA	AA	AA	AA	AA	AA	AA	AA	AA	AA	AA	AA	AA	AA	AG	AA	AA	AA	AA	AA	AA	AA	AA	AA	AA	AA	AA	AG	AA	AA	AA
Gm02_8521511_C_A	Gm02	8610788	CC	CC	CC	CC	CC	CC	CC	CC	CC	CC	CC	CC	CC	CC	CC	CC	CC	CC	CC	CC	CC	CC	CC	CC	CC	CC	CC	CC	CC	CC	CC	CC	CC	CC	CC	CC	CC	CC	CC	CC	CC	CC	CC	--	CC	CC	CC
Gm02_8730196_G_A	Gm02	8819494	GG	GG	GG	GG	GG	GG	GG	GG	GG	GG	GG	GG	GG	GG	GG	GG	GG	GG	GG	GG	GG	GG	GG	GG	GG	GG	GG	GG	GG	GG	GG	GG	GG	GG	GG	GG	GG	GG	GG	GG	GG	GG	GG	GG	GG	GG	GG
Gm02_9025221_T_C	Gm02	9113125	TC	CC	TT	CC	TT	CC	CC	TT	CC	CC	CC	CC	CC	TT	CC	CC	TT	CC	CC	CC	TT	CC	--	TT	CC	TT	CC	CC	--	CC	CC	TT	CC	CC	TT	TT	CC	CC	CC	CC	TT	TT	CC	CC	CC	CC	CC
Gm02_9039246_T_C	Gm02	9127150	TT	TT	TT	TT	TT	TT	TT	TT	TT	TT	TT	TT	TT	TT	TT	TT	TT	TT	TT	TT	TT	TT	TT	TT	TT	TT	TT	TT	TT	TT	TT	TT	TT	TT	TT	TT	TT	TT	TT	TT	TT	TT	TT	TT	TT	TT	TT
Gm02_9289865_C_T	Gm02	9386766	TT	TT	TT	TT	TT	TT	TT	TT	TT	TT	TT	TT	TT	TT	TT	TT	TT	TT	TT	TT	TT	TT	TT	TT	TT	TT	TT	TT	TT	TT	TT	TT	TT	TT	TT	TT	TT	TT	TT	TT	TT	TT	TT	TT	TT	TT	TT
Gm02_9370878_G_T	Gm02	9467609	TT	TT	TT	TT	TT	TT	TT	TT	TT	TT	TT	TT	TT	TT	TT	TT	TT	TT	TT	TT	TT	TT	TT	TT	TT	TT	TT	TT	TT	TT	TT	TT	TT	TT	TT	TT	TT	TT	TT	TT	TT	TT	TT	TT	TT	TT	TT
Gm02_9592601_A_G	Gm02	9690873	GG	GG	GG	GG	GG	GG	GG	GG	GG	GG	GG	GG	GG	GG	GG	GG	GG	GG	GG	GG	GG	GG	GG	GG	GG	GG	GG	GG	GG	GG	GG	GG	GG	GG	GG	GG	GG	GG	GG	GG	GG	GG	GG	GG	GG	GG	GG
Gm02_9670302_A_G	Gm02	9767655	AG	GG	AA	GG	AA	GG	GG	AA	GG	GG	GG	GG	GG	AA	GG	GG	AA	GG	GG	GG	AA	GG	--	AA	GG	AA	GG	GG	AG	GG	GG	AA	GG	GG	AA	AA	GG	GG	GG	GG	AA	AA	GG	GG	GG	GG	GG
Gm02_9795247_C_T	Gm02	9894068	--	TT	CC	TT	CC	TT	TT	CC	TT	TT	TT	TT	TT	CC	TT	TT	CC	--	TT	TT	CC	TT	TC	CC	TT	CC	TT	TT	TC	TT	TT	CC	TT	TT	CC	CC	TT	TT	TT	TT	--	CC	TT	TT	TT	TT	TT
Gm02_9873369_T_C	Gm02	9972239	TC	CC	TT	CC	TT	CC	CC	TT	CC	CC	CC	CC	CC	TT	CC	CC	TT	CC	CC	CC	TT	CC	--	TT	CC	TT	CC	CC	TC	CC	CC	TT	CC	CC	TT	TT	CC	CC	CC	CC	TT	TT	CC	CC	CC	CC	CC
Gm02_9990067_T_C	Gm02	10069346	TT	TT	TT	TT	TT	TT	TT	TT	TT	TT	TT	TT	TT	TT	TT	TT	TT	TT	TT	TT	TT	TT	TT	TT	TT	TT	TT	TT	TT	TT	TT	TT	TT	TT	TT	TT	TT	TT	TT	TT	TT	TT	TT	TT	TT	TT	TT
Gm02_10074856_T_C	Gm02	10154133	TT	TT	TT	TT	TT	TT	TT	TT	TT	TT	TT	TT	TT	TT	TT	TT	TT	TT	TT	TT	TT	TT	TT	TT	TT	TT	TT	TT	TT	TT	TT	TT	TT	TT	TT	TT	TT	TT	TT	TT	TT	TT	TT	TT	TT	TT	TT
Gm02_10200610_C_T	Gm02	10279884	TT	TT	TT	TT	TT	TT	TT	TT	TT	TT	TT	TT	TT	TT	TT	TT	TT	TT	TT	TT	TT	TT	TT	TT	TT	TT	TT	TT	TT	TT	TC	TT	TT	TT	TT	TT	TT	TT	TT	TT	TT	TT	TT	TC	TT	TT	TT
Gm02_10373210_C_T	Gm02	10453962	TT	TT	TT	TT	TT	TT	TT	TT	TT	TT	TT	TT	TT	TT	TT	TT	TT	TT	TT	TT	TT	TT	TT	TT	TT	TT	TT	TT	TT	TT	TC	TT	TT	TT	TT	TT	TT	TT	TT	TT	TT	TT	TT	TC	TT	TT	TT
Gm02_10536842_A_G	Gm02	10618540	GG	GG	GG	GG	GG	GG	GG	GG	GG	GG	GG	GG	GG	GG	GG	GG	GG	GG	GG	GG	GG	GG	GG	GG	GG	GG	GG	GG	GG	GG	GG	GG	GG	GG	GG	GG	GG	GG	GG	GG	GG	GG	GG	GG	GG	GG	GG
Gm02_10709966_C_T	Gm02	10791729	--	TT	TT	TT	TT	TT	TT	TT	TT	TT	TT	TT	TT	TT	TT	TT	TT	TT	TT	TT	TT	TT	TT	TT	TT	TT	TT	TT	TT	TT	TC	TT	TT	TT	TT	TT	TT	TT	TT	TT	TT	TT	TT	TC	TT	TT	TT
Gm02_10810984_G_A	Gm02	10903396	AA	AA	AA	AA	AA	AA	AA	AA	AA	AA	AA	AA	AA	AA	AA	AA	AA	AA	AA	AA	AA	AA	AA	AA	AA	AA	AA	AA	AA	AA	AG	AA	AA	AA	AA	AA	AA	AA	AA	AA	AA	AA	AA	AG	AA	AA	AA
Gm02_10843145_C_T	Gm02	10935557	TT	TT	TT	TT	TT	TT	TT	TT	TT	TT	TT	TT	TT	TT	TT	TT	TT	TT	TT	TT	TT	TT	TT	TT	TT	TT	TT	TT	TT	TT	TC	TT	TT	TT	TT	TT	TT	TT	TT	TT	TT	TT	TT	TC	TT	TT	TT
Gm02_10954777_T_C	Gm02	11047340	CC	CC	CC	CC	CC	CC	CC	CC	CC	CC	CC	CC	CC	CC	CC	CC	CC	CC	CC	CC	CC	CC	CC	CC	CC	CC	CC	CC	CC	CC	TC	CC	CC	CC	CC	CC	CC	CC	CC	CC	CC	CC	CC	TC	CC	CC	CC
Gm02_11042236_G_A	Gm02	11134264	AA	AA	AA	AA	AA	AA	AA	AA	AA	AA	AA	AA	AA	AA	AA	AA	AA	AA	AA	AA	AA	AA	AA	AA	AA	AA	AA	AA	AA	AA	AA	AA	AA	AA	AA	AA	AA	AA	AA	AA	AA	AA	AA	AA	AA	AA	AA
Gm02_11180500_A_C	Gm02	11272532	CC	CC	CC	CC	CC	CC	CC	CC	CC	CC	CC	CC	CC	CC	CC	CC	CC	CC	CC	CC	CC	CC	CC	CC	CC	CC	CC	CC	CC	CC	CC	CC	CC	CC	CC	CC	CC	CC	CC	CC	CC	CC	CC	--	CC	CC	CC
Gm02_11257077_A_G	Gm02	11349126	GG	GG	GG	GG	GG	GG	GG	GG	GG	GG	GG	GG	GG	GG	GG	GG	GG	GG	GG	GG	GG	GG	GG	GG	GG	GG	GG	GG	GG	GG	GG	GG	GG	GG	GG	GG	GG	GG	GG	GG	GG	GG	GG	GG	GG	GG	GG
Gm02_11494870_T_C	Gm02	11831588	CC	CC	CC	CC	CC	CC	CC	CC	CC	CC	CC	CC	CC	CC	CC	CC	CC	CC	CC	CC	CC	CC	CC	CC	CC	CC	CC	CC	CC	CC	CC	CC	CC	CC	CC	CC	CC	CC	CC	CC	CC	CC	CC	CC	CC	CC	CC
Gm02_11540598_C_T	Gm02	11877262	TT	TT	TT	TT	TT	TT	TT	TT	TT	TT	TT	TT	TT	TT	TT	TT	TT	TT	TT	TT	TT	TT	TT	TT	TT	TT	TT	TT	TT	TT	TT	TT	TT	TT	TT	TT	TT	TT	TT	TT	TT	TT	TT	TT	TT	TT	TT
Gm02_11628896_T_C	Gm02	11965390	CC	CC	CC	CC	CC	CC	CC	CC	CC	CC	CC	CC	CC	CC	CC	CC	CC	CC	CC	CC	CC	CC	CC	CC	CC	CC	CC	CC	CC	CC	CC	CC	CC	CC	CC	CC	CC	CC	CC	CC	CC	CC	CC	CC	CC	CC	CC
Gm02_11998056_T_C	Gm02	12334435	CC	CC	CC	CC	CC	CC	CC	CC	CC	CC	CC	CC	CC	CC	CC	CC	CC	CC	CC	CC	CC	CC	CC	CC	CC	CC	CC	CC	CC	CC	CC	CC	CC	CC	CC	CC	CC	CC	CC	CC	CC	CC	CC	CC	CC	CC	CC
Gm02_12078209_G_A	Gm02	12414985	AA	AA	AA	AA	AA	AA	AA	AA	AA	AA	AA	AA	AA	AA	AA	AA	AA	AA	AA	AA	AA	AA	AA	AA	AA	AA	AA	AA	AA	AA	AA	AA	AA	AA	AA	AA	AA	AA	AA	AA	AA	AA	AA	AA	AA	AA	AA
Gm02_12168684_T_G	Gm02	12506411	--	TT	GG	TT	TT	TT	TT	GG	TT	TT	TT	TT	TT	TT	TT	TT	GG	GG	GG	TT	GG	TT	--	GG	GG	GG	TT	GG	TG	TT	TT	GG	TT	TT	GG	GG	GG	TT	TT	TT	GG	TT	TT	TT	TT	GG	TT
Gm02_12244605_A_G	Gm02	12582331	--	AA	GG	AA	AA	AA	AA	GG	AA	AA	AA	AA	AA	AA	AA	AA	GG	GG	GG	AA	GG	AA	AG	GG	GG	GG	AA	GG	AG	AA	AA	GG	AA	AA	GG	GG	GG	AA	AA	AA	--	AA	AA	AA	AA	GG	AA
Gm02_12303360_T_G	Gm02	12640902	TT	TT	TT	TT	TT	TT	TT	TT	TT	TT	TT	TT	TT	TT	TT	TT	TT	TT	TT	TT	TT	TT	TT	TT	TT	TT	TT	TT	TT	TT	TT	TT	TT	TT	TT	TT	TT	TT	TT	TT	TT	TT	TT	TT	TT	TT	TT
Gm02_13117615_T_C	Gm02	13478261	TC	TT	CC	TT	TT	TT	TT	CC	TT	TT	TT	TT	TT	TT	TT	TT	CC	CC	CC	TT	CC	TT	--	CC	CC	CC	TT	CC	CC	TT	TC	CC	TT	TT	CC	CC	CC	TT	TT	TT	CC	TT	TT	TT	TT	CC	TT
Gm02_13476678_G_A	Gm02	13674975	GG	GG	AA	GG	GG	GG	GG	AA	GG	GG	GG	GG	GG	GG	GG	GG	AA	AA	AA	GG	AA	GG	AG	AA	AA	AA	GG	AA	AG	GG	GG	AA	GG	GG	AA	AA	AA	GG	GG	GG	--	GG	GG	GG	GG	AA	GG
Gm02_13963693_C_A	Gm02	14161558	AC	AA	AA	AA	AA	AA	AA	AA	AA	AA	AA	AA	AA	AA	AA	AA	AA	CC	CC	AA	CC	AA	CC	AA	CC	AA	AA	CC	AA	AA	AC	AA	AA	AA	AA	AA	CC	AA	AA	AA	AA	AA	AA	AC	AA	CC	AA
Gm02_14022512_C_T	Gm02	14220378	TT	TT	CC	TT	TT	TT	TT	CC	TT	TT	TT	TT	TT	TT	TT	TT	CC	TT	TT	TT	TT	TT	TT	CC	TT	CC	TT	TT	CC	TT	TT	CC	TT	TT	CC	CC	TT	TT	TT	TT	CC	TT	TT	--	TT	TT	TT
Gm02_14127417_A_G	Gm02	14330827	AG	AA	AA	AA	AA	AA	AA	AA	AA	AA	AA	AA	AA	AA	AA	AA	AA	GG	GG	AA	GG	AA	GG	AA	GG	AA	AA	GG	AA	AA	AA	AA	AA	AA	AA	AA	GG	AA	AA	AA	AA	AA	AA	AG	AA	GG	AA
Gm02_14215487_T_G	Gm02	14419208	GG	GG	TG	GG	GG	GG	GG	TT	GG	GG	GG	GG	GG	GG	GG	GG	TT	GG	GG	GG	GG	GG	GG	TT	GG	TT	GG	GG	TG	GG	GG	TT	GG	GG	TT	TT	GG	GG	GG	GG	TG	GG	GG	GG	GG	GG	GG
Gm02_14266842_G_A	Gm02	14470563	AG	AA	GG	AA	AA	AA	AA	GG	AA	AA	AA	AA	AA	AA	AA	AA	GG	GG	GG	AA	GG	AA	--	GG	GG	GG	AA	GG	GG	AA	AG	GG	AA	AA	GG	GG	GG	AA	AA	AA	GG	AA	AA	AG	AA	GG	AA
Gm02_14345423_T_G	Gm02	14549144	GG	TT	TT	TT	TT	TT	TT	TT	TT	TT	TT	TT	TT	TT	TT	TT	TT	GG	GG	TT	GG	TT	GG	TT	GG	TT	TT	GG	TT	TT	TT	TT	TT	TT	TT	TT	GG	TT	TT	TT	TT	TT	TT	TG	TT	GG	TT
Gm02_14508130_C_T	Gm02	14710975	CC	TT	CC	TT	TT	TT	TT	CC	TT	TT	TT	TT	TT	TT	TT	TT	CC	CC	CC	TT	CC	TT	--	CC	CC	CC	TT	CC	CC	TT	--	CC	TT	TT	CC	CC	CC	TT	TT	TT	CC	TT	TT	TT	TT	CC	TT
Gm02_14561578_A_G	Gm02	14764422	GG	AA	GG	AA	AA	AA	AA	GG	AA	AA	AA	AA	AA	AA	AA	AA	GG	GG	GG	AA	GG	AA	--	GG	GG	GG	AA	GG	GG	AA	AA	GG	AA	AA	GG	GG	GG	AA	AA	AA	GG	AA	AA	AA	AA	GG	AA
Gm02_14715495_T_C	Gm02	14917949	TT	TT	TT	TT	TT	TT	TT	TT	TT	TT	TT	TT	TT	TT	TT	TT	TT	TT	TT	TT	TT	TT	TT	TT	TT	TT	TT	TT	TT	TT	TT	TT	TT	TT	TT	TT	TT	TT	TT	TT	TT	TT	TT	TT	TT	TT	TT
Gm02_15067760_G_A	Gm02	15271225	GG	GG	GG	GG	GG	GG	GG	GG	GG	GG	GG	GG	GG	GG	GG	GG	GG	GG	GG	GG	GG	GG	GG	GG	GG	GG	GG	GG	GG	GG	GG	GG	GG	GG	GG	GG	GG	GG	GG	GG	GG	GG	GG	GG	GG	GG	GG
Gm02_15426845_A_C	Gm02	15630228	AA	AA	AA	AA	AA	AA	AA	AA	AA	AA	AA	AA	AA	AA	AA	AA	AA	AA	AA	AA	AA	AA	AA	AA	AA	AA	AA	AA	AA	AA	AC	AA	AA	AA	AA	AA	AA	AA	AA	AA	AA	AA	AA	AA	AA	AA	AA
Gm02_19218365_T_C	Gm02	19505166	TT	TT	TT	TT	TT	TT	TT	TT	TT	TT	TT	TT	TT	TT	TT	TT	TT	TT	TT	TT	TT	TT	TT	TT	TT	TT	TT	TT	TT	TT	TT	TT	TT	TT	TT	TT	TT	TT	TT	TT	TT	TT	TT	TT	TT	TT	TT
Gm02_22067031_G_T	Gm02	20406804	TT	TT	TT	TT	TT	TT	TT	TT	TT	TT	TT	TT	TT	TT	TT	TT	TT	TT	TT	TT	TT	TT	TT	TT	TT	TT	TT	TT	TT	TT	TT	TT	TT	TT	TT	TT	TT	TT	TT	TT	TT	TT	TT	TT	TT	TT	TT
Gm02_29528097_T_C	Gm02	24269404	TT	TT	TT	TT	TT	TT	TT	TT	TT	TT	TT	TT	TT	TT	TT	TT	TT	TT	TT	TT	TT	TT	TT	TT	TT	TT	TT	TT	TT	TT	TT	TT	TT	TT	TT	TT	TT	TT	TT	TT	TT	TT	TT	TT	TT	TT	TT
Gm02_28331531_C_A	Gm02	25456057	CC	CC	CC	CC	CC	CC	CC	CC	CC	CC	CC	CC	CC	CC	CC	CC	CC	CC	CC	CC	CC	CC	CC	CC	CC	CC	CC	CC	CC	CC	CC	CC	CC	CC	CC	CC	CC	CC	CC	CC	CC	CC	CC	CC	CC	CC	CC
Gm02_27824060_T_G	Gm02	25968828	TT	TT	TT	TT	TT	TT	TT	TT	TT	TT	TT	TT	TT	TT	TT	TT	TT	TT	TT	TT	TT	TT	TT	TT	TT	TT	TT	TT	TT	TT	--	TT	TT	TT	TT	TT	TT	TT	TT	TT	TT	TT	TT	TT	TT	TT	TT
Gm02_30250662_T_C	Gm02	27086017	CC	CC	CC	CC	CC	CC	CC	CC	CC	CC	CC	CC	CC	CC	CC	CC	CC	CC	CC	CC	CC	CC	CC	CC	CC	CC	CC	CC	CC	CC	CC	CC	CC	CC	CC	CC	CC	CC	CC	CC	CC	CC	CC	CC	CC	CC	CC
Gm02_30996860_A_G	Gm02	27822018	AA	AA	AA	AA	AA	AA	AA	AA	AA	AA	AA	AA	AA	AA	AA	AA	AA	AA	AA	AA	AA	AA	AA	AA	AA	AA	AA	AA	AA	AA	AG	AA	AA	AA	AA	AA	AA	AA	AA	AA	AA	AA	AA	AA	AA	AA	AA
Gm02_31905028_C_A	Gm02	28726135	AA	AA	AA	AA	AA	AA	AA	AA	AA	AA	AA	AA	AA	AA	AA	AA	AA	AA	AA	AA	AA	AA	AA	AA	AA	AA	AA	AA	AA	AA	AA	AA	AA	AA	AA	AA	AA	AA	AA	AA	AA	AA	AA	AA	AA	AA	AA
Gm02_32346915_G_A	Gm02	29175395	AA	AA	AA	AA	AA	AA	AA	AA	AA	AA	AA	AA	AA	AA	AA	AA	AA	AA	AA	AA	AA	AA	AA	AA	AA	AA	AA	AA	AA	AA	AG	AA	AA	AA	AA	AA	AA	AA	AA	AA	AA	AA	AA	AA	AA	AA	AA
Gm02_32487728_T_C	Gm02	29316845	TT	TT	TT	TT	TT	TT	TT	TT	TT	TT	TT	TT	TT	TT	TT	TT	TT	TT	TT	TT	TT	TT	TT	TT	TT	TT	TT	TT	TT	TT	TC	TT	TT	TT	TT	TT	TT	TT	TT	TT	TT	TT	TT	TT	TT	TT	TT
Gm02_32605960_T_C	Gm02	29435127	TT	TT	TT	TT	TT	TT	TT	TT	TT	TT	TT	TT	TT	TT	TT	TT	TT	TT	TT	TT	TT	TT	TT	TT	TT	TT	TT	TT	TT	TT	TT	TT	TT	TT	TT	TT	TT	TT	TT	TT	TT	TT	TT	TT	TT	TT	TT
Gm02_32880763_C_T	Gm02	29704691	TT	TT	TT	TT	TT	TT	TT	TT	TT	TT	TT	TT	TT	TT	TT	TT	TT	TT	TT	TT	TT	TT	TT	TT	TT	TT	TT	TT	TT	TT	TC	TT	TT	TT	TT	TT	TT	TT	TT	TT	TT	TT	TT	TT	TT	TT	TT
Gm02_32904473_T_C	Gm02	29728401	TT	TT	TT	TT	TT	TT	TT	TT	TT	TT	TT	TT	TT	TT	TT	TT	TT	TT	TT	TT	TT	TT	TT	TT	TT	TT	TT	TT	TT	TT	TT	TT	TT	TT	TT	TT	TT	TT	TT	TT	TT	TT	TT	TT	TT	TT	TT
Gm02_33117418_G_T	Gm02	30015938	GG	GG	GG	GG	GG	GG	GG	GG	GG	GG	GG	GG	GG	GG	GG	GG	GG	GG	GG	GG	GG	GG	GG	GG	GG	GG	GG	GG	GG	GG	TG	GG	GG	GG	GG	GG	GG	GG	GG	GG	GG	GG	GG	GG	GG	GG	GG
Gm02_33608259_T_C	Gm02	30509898	CC	CC	CC	CC	CC	CC	CC	CC	CC	CC	CC	CC	CC	CC	CC	CC	CC	CC	CC	CC	CC	CC	CC	CC	CC	CC	CC	CC	CC	CC	--	CC	CC	CC	CC	CC	CC	CC	CC	CC	CC	CC	CC	CC	CC	CC	CC
Gm02_34381583_T_C	Gm02	31282858	CC	CC	CC	CC	CC	CC	CC	CC	CC	CC	CC	CC	CC	CC	CC	CC	CC	CC	CC	CC	CC	CC	CC	CC	CC	CC	CC	CC	CC	CC	CC	CC	CC	CC	CC	CC	CC	CC	CC	CC	CC	CC	CC	CC	CC	CC	CC
Gm02_34765594_A_G	Gm02	31665695	GG	GG	GG	GG	GG	GG	GG	GG	GG	GG	GG	GG	GG	GG	GG	GG	GG	GG	GG	GG	GG	GG	GG	GG	GG	GG	GG	GG	GG	GG	--	GG	GG	GG	GG	GG	GG	GG	GG	GG	GG	GG	GG	GG	GG	GG	GG
Gm02_35348897_T_C	Gm02	32269933	CC	CC	CC	CC	CC	CC	CC	CC	CC	CC	CC	CC	CC	CC	CC	CC	CC	CC	CC	CC	CC	CC	CC	CC	CC	CC	CC	CC	CC	CC	--	CC	CC	CC	CC	CC	CC	CC	CC	CC	CC	CC	CC	CC	CC	CC	CC
Gm02_35471507_A_G	Gm02	32392798	GG	GG	GG	GG	GG	GG	GG	GG	GG	GG	GG	GG	GG	GG	GG	GG	GG	GG	GG	GG	GG	GG	GG	GG	GG	GG	GG	GG	GG	GG	--	GG	GG	GG	GG	GG	GG	GG	GG	GG	GG	GG	GG	GG	GG	GG	GG
Gm02_36666688_T_C	Gm02	32865348	CC	CC	CC	CC	CC	CC	CC	CC	CC	CC	CC	CC	CC	CC	CC	CC	CC	CC	CC	CC	CC	CC	CC	CC	CC	CC	CC	CC	CC	CC	CC	CC	CC	CC	CC	CC	CC	CC	CC	CC	CC	CC	CC	CC	CC	CC	CC
Gm02_36300454_T_C	Gm02	33769092	CC	CC	CC	CC	CC	CC	CC	CC	CC	CC	CC	CC	CC	CC	CC	CC	CC	CC	CC	CC	CC	CC	CC	CC	CC	CC	CC	CC	CC	CC	CC	CC	CC	CC	CC	CC	CC	CC	CC	CC	CC	CC	CC	CC	CC	CC	CC
Gm02_37441958_T_C	Gm02	34367314	CC	CC	CC	CC	CC	CC	CC	CC	CC	CC	CC	CC	CC	CC	CC	CC	CC	CC	CC	CC	CC	CC	CC	CC	CC	CC	CC	CC	CC	CC	CC	CC	CC	CC	CC	CC	CC	CC	CC	CC	CC	CC	CC	CC	CC	CC	CC
Gm02_38261529_G_A	Gm02	35184471	AA	AA	AA	AA	AA	AA	AA	AA	AA	AA	AA	AA	AA	AA	AA	AA	AA	AA	AA	AA	AA	AA	AA	AA	AA	AA	AA	AA	AA	AA	--	AA	AA	AA	AA	AA	AA	AA	AA	AA	AA	AA	AA	AA	AA	AA	AA
Gm02_38843686_T_C	Gm02	35774096	CC	CC	CC	CC	CC	CC	CC	CC	CC	CC	CC	CC	CC	CC	CC	CC	CC	CC	CC	CC	CC	CC	CC	CC	CC	CC	CC	CC	CC	CC	--	CC	CC	CC	CC	CC	CC	CC	CC	CC	CC	CC	CC	CC	CC	CC	CC
Gm02_39299266_A_G	Gm02	36219154	GG	GG	GG	GG	GG	GG	GG	GG	GG	GG	GG	GG	GG	GG	GG	GG	GG	GG	GG	GG	GG	GG	GG	GG	GG	GG	GG	GG	GG	GG	GG	GG	GG	GG	GG	GG	GG	GG	GG	GG	GG	GG	GG	GG	GG	GG	GG
Gm02_39548191_C_A	Gm02	36468561	AA	AA	AA	AA	AA	AA	AA	AA	AA	AA	AA	AA	AA	AA	AA	AA	AA	AA	AA	AA	AA	AA	AA	AA	AA	AA	AA	AA	AA	AA	AA	AA	AA	AA	AA	AA	AA	AA	AA	AA	AA	AA	AA	AA	AA	AA	AA
Gm02_39931059_T_C	Gm02	36851924	CC	CC	CC	CC	CC	CC	CC	CC	CC	CC	CC	CC	CC	CC	CC	CC	CC	CC	CC	CC	CC	CC	CC	CC	CC	CC	CC	CC	CC	CC	CC	CC	CC	CC	CC	CC	CC	CC	CC	CC	CC	CC	CC	CC	CC	CC	CC
Gm02_40730869_T_C	Gm02	37650346	CC	CC	CC	CC	CC	CC	CC	CC	CC	CC	CC	CC	CC	CC	CC	CC	CC	CC	CC	CC	CC	CC	CC	CC	CC	CC	CC	CC	CC	CC	CC	CC	CC	CC	CC	CC	CC	CC	CC	CC	CC	CC	CC	CC	CC	CC	CC
Gm02_41021889_G_T	Gm02	37951218	TT	TT	TT	TT	TT	TT	TT	TT	TT	TT	TT	TT	TT	TT	TT	TT	TT	TT	TT	TT	TT	TT	TT	TT	TT	TT	TT	TT	TT	TT	TG	TT	TT	TT	TT	TT	TT	TT	TT	TT	TT	TT	TT	TT	TT	TT	TT
Gm02_41481689_T_C	Gm02	38410937	CC	CC	CC	CC	CC	CC	CC	CC	CC	CC	CC	CC	CC	CC	CC	CC	CC	CC	CC	CC	CC	CC	CC	CC	CC	CC	CC	CC	CC	CC	--	CC	CC	CC	CC	CC	CC	CC	CC	CC	CC	CC	CC	CC	CC	CC	CC
Gm02_41505846_A_G	Gm02	38435094	GG	GG	GG	GG	GG	GG	GG	GG	GG	GG	GG	GG	GG	GG	GG	GG	GG	GG	GG	GG	GG	GG	GG	GG	GG	GG	GG	GG	GG	GG	--	GG	GG	GG	GG	GG	GG	GG	GG	GG	GG	GG	GG	GG	GG	GG	GG
Gm02_41583970_C_A	Gm02	38512775	AA	AA	AA	AA	AA	AA	AA	AA	AA	AA	AA	AA	AA	AA	AA	AA	AA	AA	AA	AA	AA	AA	AA	AA	AA	AA	AA	AA	AA	AA	AC	AA	AA	AA	AA	AA	AA	AA	AA	AA	AA	AA	AA	AA	AA	AA	AA
Gm02_41788343_T_C	Gm02	38717133	CC	CC	CC	CC	CC	CC	CC	CC	CC	CC	CC	CC	CC	CC	CC	CC	CC	CC	CC	CC	CC	CC	CC	CC	CC	CC	CC	CC	CC	CC	CC	CC	CC	CC	CC	CC	CC	CC	CC	CC	CC	CC	CC	CC	CC	CC	CC
Gm02_41860500_T_C	Gm02	38789290	CC	CC	CC	CC	CC	CC	CC	CC	CC	CC	CC	CC	CC	CC	CC	CC	CC	CC	CC	CC	CC	CC	CC	CC	CC	CC	CC	CC	CC	CC	CC	CC	CC	CC	CC	CC	CC	CC	CC	CC	CC	CC	CC	CC	CC	CC	CC
Gm02_41931129_T_G	Gm02	38860035	GG	GG	GG	GG	GG	GG	GG	GG	GG	GG	GG	GG	GG	GG	GG	GG	GG	GG	GG	GG	GG	GG	GG	GG	GG	GG	GG	GG	GG	GG	GG	GG	GG	GG	GG	GG	GG	GG	GG	GG	GG	GG	GG	GG	GG	GG	GG
Gm02_41979401_T_C	Gm02	38908307	CC	CC	CC	CC	CC	CC	CC	CC	CC	CC	CC	CC	CC	CC	CC	CC	CC	CC	CC	CC	CC	CC	CC	CC	CC	CC	CC	CC	CC	CC	CC	CC	CC	CC	CC	CC	CC	CC	CC	CC	CC	CC	CC	CC	CC	CC	CC
Gm02_42073855_G_A	Gm02	39002760	AA	AA	AA	AA	AA	AA	AA	AA	AA	AA	AA	AA	AA	AA	AA	AA	AA	AA	AA	AA	AA	AA	AA	AA	AA	AA	AA	AA	AA	AA	AA	AA	AA	AA	AA	AA	AA	AA	AA	AA	AA	AA	AA	AA	AA	AA	AA
Gm02_42204732_T_C	Gm02	39133046	CC	CC	CC	CC	CC	CC	CC	CC	CC	CC	CC	CC	CC	CC	CC	CC	CC	CC	CC	CC	CC	CC	CC	CC	CC	CC	CC	CC	CC	CC	CC	CC	CC	CC	CC	CC	CC	CC	CC	CC	CC	CC	CC	CC	CC	CC	CC
Gm02_42355637_A_G	Gm02	39283955	AA	GG	AA	GG	GG	AA	GG	AA	GG	GG	GG	GG	GG	GG	AA	GG	AA	GG	AA	AA	AA	GG	--	GG	AA	GG	GG	AA	GG	AA	GG	AA	GG	AA	--	GG	GG	GG	GG	GG	AA	GG	GG	GG	GG	GG	GG
Gm02_42404873_T_C	Gm02	39333124	CC	CC	CC	CC	CC	CC	CC	CC	CC	CC	CC	CC	CC	CC	CC	CC	CC	CC	CC	CC	CC	CC	CC	CC	CC	CC	CC	CC	CC	CC	CC	CC	CC	CC	CC	CC	CC	CC	CC	CC	CC	CC	CC	CC	CC	CC	CC
Gm02_42788887_A_G	Gm02	39712323	GG	AA	GG	AA	AA	GG	AA	GG	AA	AA	AA	AG	AA	AA	GG	AA	GG	GG	GG	GG	GG	AA	AA	AA	GG	AA	AA	GG	AA	GG	AA	GG	AA	GG	--	AA	AA	AA	AA	AA	GG	AA	AA	AA	AA	AA	AA
Gm02_42844384_T_C	Gm02	39767727	CC	TT	CC	TT	TT	CC	TT	CC	TT	TT	TT	TT	TT	TT	CC	TT	CC	CC	CC	CC	CC	TT	TT	TT	CC	TT	TT	CC	TT	TT	TT	CC	TT	CC	TC	TT	TT	TT	TT	TT	CC	TT	TT	TT	TT	TT	TT
Gm02_42928916_T_C	Gm02	39852696	CC	TT	CC	TT	TT	CC	TT	CC	TT	TT	TT	TT	TT	TT	CC	TT	CC	CC	CC	CC	CC	--	TC	TT	CC	TT	TT	CC	TT	TT	TT	CC	TT	CC	--	TT	TT	TT	TT	TT	CC	TT	--	TC	TT	TT	TT
Gm02_43139891_G_A	Gm02	40063716	AA	GG	AA	GG	GG	AA	GG	AA	GG	GG	GG	GG	GG	GG	AA	GG	AA	AA	AA	AA	AA	GG	GG	GG	AA	GG	GG	AA	GG	GG	GG	AA	GG	AA	--	GG	GG	GG	GG	GG	AA	GG	GG	GG	GG	GG	GG
Gm02_43725963_A_G	Gm02	40649856	GG	GG	GG	AA	AA	GG	AA	GG	AA	AA	AA	AA	AA	AA	GG	AA	GG	GG	GG	GG	AA	AA	AG	AA	GG	AA	AA	AA	AA	AA	--	GG	AA	GG	--	AA	AA	AA	AA	AA	GG	AA	AA	AG	AA	AA	AA
Gm02_43777700_A_G	Gm02	40701593	GG	GG	GG	AA	AA	GG	AA	GG	AA	AA	AA	GG	AA	AA	GG	AA	GG	GG	GG	GG	AA	AA	AA	AA	GG	AA	GG	AA	AA	AA	AA	GG	AA	GG	AG	AA	AA	AA	AA	AA	GG	AA	AA	AA	AA	AA	AA
Gm02_43889571_T_C	Gm02	40813466	CC	CC	CC	TT	TT	CC	TT	CC	TT	TT	TT	CC	TT	TT	CC	TT	CC	CC	CC	CC	TT	TT	TT	TT	CC	TT	CC	TT	TT	TT	TT	CC	TT	CC	TC	TT	TT	TT	TT	TT	CC	TT	TT	TT	TT	TT	TT
Gm02_43952429_A_G	Gm02	40875934	AA	AA	AA	GG	GG	AA	GG	AA	GG	GG	GG	AA	GG	GG	AA	GG	AA	AA	AA	AA	GG	GG	GG	GG	AA	GG	AA	GG	GG	GG	GG	AA	GG	AA	AG	GG	GG	GG	GG	GG	AA	GG	GG	GG	GG	GG	GG
Gm02_44033150_T_C	Gm02	40956596	CC	CC	CC	CC	CC	CC	CC	CC	CC	CC	CC	CC	CC	CC	CC	CC	CC	CC	CC	CC	CC	CC	CC	CC	CC	CC	CC	CC	CC	CC	CC	CC	CC	CC	CC	CC	CC	CC	CC	CC	CC	CC	CC	CC	CC	CC	CC
Gm02_44156636_G_T	Gm02	41080083	TT	TT	TT	TT	TT	TT	TT	TT	TT	TT	TT	TT	TT	TT	TT	TT	TT	TT	TT	TT	TT	TT	TT	TT	TT	TT	TT	TT	TT	TT	--	TT	TT	TT	TT	TT	TT	TT	TT	TT	TT	TT	TT	TT	TT	TT	TT
Gm02_44190678_C_T	Gm02	41114125	TT	TT	TT	TT	TT	TT	TT	TT	TT	TT	TT	TT	TT	TT	TT	TT	TT	TT	TT	TT	TT	TT	TT	TT	TT	TT	TT	TT	TT	TT	TC	TT	TT	TT	TT	TT	TT	TT	TT	TT	TT	TT	TT	TT	TT	TT	TT
Gm02_44401175_C_T	Gm02	41324651	TT	TT	TT	CC	CC	TT	CC	TT	CC	CC	CC	TC	CC	TC	TT	CC	CC	TT	TT	TT	CC	CC	CC	CC	TT	CC	TT	CC	CC	CC	CC	TT	CC	TT	TC	CC	CC	CC	CC	CC	TT	CC	CC	CC	CC	CC	CC
Gm02_44461839_G_A	Gm02	41384134	AA	AA	AA	GG	GG	AA	GG	AA	GG	GG	GG	--	GG	AG	AA	GG	GG	AA	AA	AA	GG	GG	GG	GG	AA	GG	AA	GG	GG	GG	GG	AA	GG	AA	AG	GG	GG	GG	GG	GG	AA	GG	GG	GG	GG	GG	GG
Gm02_44510528_T_C	Gm02	41432839	CC	CC	CC	TT	TT	CC	TT	CC	TT	TT	TT	CC	TT	TC	CC	TT	TT	CC	CC	CC	TT	TT	TT	TT	CC	TT	CC	TT	TT	TT	TT	CC	TT	CC	TC	TT	TT	TT	TT	TT	CC	TT	TT	TT	TT	TT	TT
Gm02_45051600_A_G	Gm02	41975550	AA	AA	AA	AA	AA	AA	AA	AA	AA	AA	AA	AA	AA	AA	AA	AA	AA	AA	AA	AA	AA	AA	AA	AA	AA	AA	AA	AA	AA	AA	AA	AA	AA	AA	AA	AA	AA	AA	AA	AA	AA	AA	AA	AA	AA	AA	AA
Gm02_45088385_T_C	Gm02	42012522	TT	TT	TT	TT	TT	TT	TT	TT	TT	TT	TT	TT	TT	TT	TT	TT	TT	TT	TT	TT	TT	TT	TT	TT	TT	TT	TT	TT	TT	TT	TT	TT	TT	TT	TT	TT	TT	TT	TT	TT	TT	TT	TT	TT	TT	TT	TT
Gm02_45162941_A_G	Gm02	42088045	AA	AA	AA	AA	AA	AA	AA	AA	AA	AA	AA	AA	AA	AA	AA	AA	AA	AA	AA	AA	AA	AA	AA	AA	AA	AA	AA	AA	AA	AA	AA	AA	AA	AA	AA	AA	AA	AA	AA	AA	AA	AA	AA	AA	AA	AA	AA
Gm02_45183828_C_T	Gm02	42108934	CC	CC	CC	TT	TT	CC	TT	CC	TT	TT	TT	CC	TT	CC	CC	TT	TT	TC	CC	CC	TT	TT	--	TT	CC	TT	CC	TT	TT	TT	TT	CC	TT	CC	TC	TT	TT	TT	TT	TT	CC	CC	TT	--	TT	TT	TT
Gm02_45289939_A_G	Gm02	42215041	AA	AA	AA	AA	AA	AA	AA	AA	AA	AA	AA	AA	AA	AA	AA	AA	AA	AA	AA	AA	AA	AA	AA	AA	AA	AA	AA	AA	AA	AA	AA	AA	AA	AA	AA	AA	AA	AA	AA	AA	AA	AA	AA	AA	AA	AA	AA
Gm02_46630927_G_A	Gm02	43556059	AA	AA	AA	AA	AA	AA	AA	AA	AA	AA	AA	AA	AA	AA	AA	AA	AA	AA	AA	AA	AA	AA	AA	AA	AA	AA	AA	AA	AA	AA	AA	AA	AA	AA	AA	AA	AA	AA	AA	AA	AA	AA	AA	AA	AA	AA	AA
Gm02_46855228_G_A	Gm02	43780375	AA	AA	AA	AA	AA	AA	AA	AA	AA	AA	AA	AA	AA	AA	AA	AA	AA	AA	AA	AA	AA	AA	AA	AA	AA	AA	AA	AA	AA	AA	AA	AA	AA	AA	AA	AA	AA	AA	AA	AA	AA	AA	AA	AA	AA	AA	AA
Gm02_47051470_C_T	Gm02	43963206	TT	TT	TT	TT	TT	TT	TT	TT	TT	TT	TT	TT	TT	TT	TT	TT	TT	TT	TT	TT	TT	TT	TT	TT	TT	TT	TT	TT	TT	TT	TT	TT	TT	TT	TT	TT	TT	TT	TT	TT	TT	TT	TT	TT	TT	TT	TT
Gm02_47268207_C_T	Gm02	44180381	TT	TT	TT	TT	TT	TT	TT	TT	TT	TT	TT	TT	TT	TT	TT	TT	TT	TT	TT	TT	TT	TT	TT	TT	TT	TT	TT	TT	TT	TT	TT	TT	TT	TT	TT	TT	TT	TT	TT	TT	TT	TT	TT	TT	TT	TT	TT
Gm02_47394316_A_G	Gm02	44306758	AA	AA	AA	AA	AA	AA	AA	AA	AA	AA	AA	AA	AA	AA	AA	AA	AA	AA	AA	AA	AA	AA	AA	AA	AA	AA	AA	AA	AA	AA	AG	AA	AA	AA	AA	AA	AA	AA	AA	AA	AA	AA	AA	AG	AA	AA	AA
Gm02_48248895_A_C	Gm02	45170092	AA	AA	AA	AA	AA	AA	AA	AA	AA	AA	AA	AA	AA	AA	AA	AA	AA	AA	AA	AA	AA	AA	AA	AA	AA	AA	AA	AA	AA	AA	AA	AA	AA	AA	AA	AA	AA	AA	AA	AA	AA	AA	AA	AA	AA	AA	AA
Gm02_48583877_A_C	Gm02	45505123	--	AA	AA	AA	AA	AA	AA	AA	AA	AA	AA	AA	AA	AA	AA	AA	AA	AA	AA	AA	AA	AA	AA	AA	AA	AA	AA	AA	AA	AA	AA	AA	AA	AA	AA	AA	AA	AA	AA	AA	AA	AA	AA	AC	AA	AA	--
Gm02_48594877_C_T	Gm02	45516123	CC	CC	CC	CC	CC	CC	CC	CC	CC	CC	CC	CC	CC	CC	CC	CC	CC	CC	CC	CC	CC	CC	CC	CC	CC	CC	CC	CC	CC	CC	CC	CC	CC	CC	CC	CC	CC	CC	CC	CC	CC	CC	CC	CC	CC	CC	CC
Gm02_48821067_T_C	Gm02	45743148	TT	TT	TT	TT	TT	TT	TT	TT	TT	TT	TT	TT	TT	TT	TT	TT	TT	TT	TT	TT	TT	TT	TT	TT	TT	TT	TT	TT	TT	TT	TT	TT	TT	TT	TT	TT	TT	TT	TT	TT	TT	TT	TT	TC	TT	TT	TT
Gm02_48874048_G_A	Gm02	45795780	GG	GG	GG	GG	GG	GG	GG	GG	GG	GG	GG	GG	GG	GG	GG	GG	GG	GG	GG	GG	GG	GG	GG	GG	GG	GG	GG	GG	GG	GG	GG	GG	GG	GG	GG	GG	GG	GG	GG	GG	GG	GG	GG	GG	GG	GG	GG
Gm02_49069634_C_T	Gm02	45991978	CC	CC	CC	CC	CC	CC	CC	CC	CC	CC	CC	CC	CC	CC	CC	CC	CC	CC	CC	CC	CC	CC	CC	CC	CC	CC	CC	CC	CC	CC	CC	CC	CC	CC	CC	CC	CC	CC	CC	CC	CC	CC	CC	CC	CC	CC	CC
Gm02_49126947_T_C	Gm02	46049292	TT	TT	TT	TT	TT	TT	TT	TT	TT	TT	TT	TT	TT	TT	TT	TT	TT	TT	TT	TT	TT	TT	TT	TT	TT	TT	TT	TT	TT	TT	TT	TT	TT	TT	TT	TT	TT	TT	TT	TT	TT	TT	TT	TC	TT	TT	TT
Gm02_49388210_T_G	Gm02	46310608	GG	GG	GG	GG	GG	GG	GG	GG	GG	GG	GG	GG	GG	GG	GG	GG	GG	GG	GG	GG	GG	GG	GG	GG	GG	GG	GG	GG	GG	GG	GG	GG	GG	GG	GG	GG	GG	GG	GG	GG	GG	GG	GG	--	GG	GG	GG
Gm02_49776196_A_G	Gm02	46697848	GG	GG	GG	GG	GG	GG	GG	GG	GG	GG	GG	GG	GG	GG	GG	GG	GG	GG	GG	GG	GG	GG	GG	GG	GG	GG	GG	GG	GG	GG	GG	GG	GG	GG	GG	GG	GG	GG	GG	GG	GG	GG	GG	GG	GG	GG	GG
Gm02_49986718_G_A	Gm02	46907259	AA	AA	AA	AA	AA	AA	AA	AA	AA	AA	AA	AA	AA	AA	AA	AA	AA	AA	AA	AA	AA	AA	AA	AA	AA	AA	AA	AA	AA	AA	AA	AA	AA	AA	AA	AA	AA	AA	AA	AA	AA	AA	AA	AA	AA	AA	AA
Gm02_50304676_T_C	Gm02	47225152	CC	CC	CC	CC	CC	CC	CC	CC	CC	CC	CC	CC	CC	CC	CC	CC	CC	CC	CC	CC	CC	CC	CC	CC	CC	CC	CC	CC	CC	CC	CC	CC	CC	CC	CC	CC	CC	CC	CC	CC	CC	CC	CC	CC	CC	CC	CC
Gm02_50358347_C_T	Gm02	47278823	TT	TT	TT	TT	TT	TT	TT	TT	TT	TT	TT	TT	TT	TT	TT	TT	TT	TT	TT	TT	TT	TT	TT	TT	TT	TT	TT	TT	TT	TT	TT	TT	TT	TT	TT	TT	TT	TT	TT	TT	TT	TT	TT	TT	TT	TT	TT
Gm02_50383419_C_T	Gm02	47303895	TT	TT	TT	TT	TT	TT	TT	TT	TT	TT	TT	TT	TT	TT	TT	TT	TT	TT	TT	TT	TT	TT	TT	TT	TT	TT	TT	TT	TT	TT	TT	TT	TT	TT	TT	TT	TT	TT	TT	TT	TT	TT	TT	TT	TT	TT	TT
Gm02_50546149_C_T	Gm02	47466626	TT	TT	TT	TT	TT	TT	TT	TT	TT	TT	TT	TT	TT	TT	TT	TT	TT	TT	TT	TT	TT	TT	TT	TT	TT	TT	TT	TT	TT	TT	TT	TT	TT	TT	TT	TT	TT	TT	TT	TT	TT	TT	TT	TT	TT	TT	TT
Gm02_50706913_G_A	Gm02	47627402	AA	AA	AA	AA	AA	AA	AA	AA	AA	AA	AA	AA	AA	AA	AA	AA	AA	AA	AA	AA	AA	AA	AA	AA	AA	AA	AA	AA	AA	AA	AA	AA	AA	AA	AA	AA	AA	AA	AA	AA	AA	AA	AA	AA	AA	AA	AA
Gm02_50936574_G_T	Gm02	47857148	TT	TT	TT	TT	TT	TT	TT	TT	TT	TT	TT	TT	TT	TT	TT	TT	TT	TT	TT	TT	TT	TT	TT	TT	TT	TT	TT	TT	TT	TT	TT	TT	TT	TT	TT	TT	TT	TT	TT	TT	TT	TT	TT	TT	TT	TT	TT
Gm02_51025014_A_C	Gm02	47945589	CC	AA	AC	CC	CC	--	CC	CC	AA	CC	CC	CC	CC	--	CC	CC	AA	AC	CC	CC	AA	CC	AC	AA	CC	CC	AA	CC	AC	AA	CC	AA	AA	AA	AA	AA	CC	CC	CC	CC	AA	--	CC	AC	CC	CC	CC
Gm02_51154756_C_T	Gm02	48075547	TT	TT	TT	TT	TT	TT	TT	TT	TT	TT	TT	TT	TT	TT	TT	TT	TT	TT	TT	TT	TT	TT	TT	TT	TT	TT	TT	TT	TT	TT	TT	TT	TT	TT	TT	TT	TT	TT	TT	TT	TT	TT	TT	TT	TT	TT	TT
Gm02_51411364_G_A	Gm02	48332153	AA	GG	GG	AA	AA	GG	AA	--	GG	--	AA	AA	AA	--	AA	AA	GG	GG	AA	AA	GG	AG	GG	GG	AA	AA	GG	AA	GG	GG	AA	GG	GG	GG	GG	GG	AA	AA	AG	AA	GG	--	--	GG	AA	AA	AA
Gm02_51429037_T_C	Gm02	48349826	CC	TT	TT	CC	CC	TT	CC	CC	TT	CC	CC	CC	CC	--	CC	CC	TT	TT	CC	CC	TT	CC	TT	TT	CC	CC	TT	CC	TT	TT	CC	TT	TT	TT	TT	TT	CC	CC	CC	CC	TT	--	CC	--	CC	CC	CC
Gm03_949581_T_C	Gm03	966701	TC	TT	CC	--	CC	TT	TT	CC	CC	TT	TT	TT	CC	CC	TT	TT	CC	--	TT	TT	TT	TC	TC	TT	TT	TT	TT	TT	--	CC	TT	CC	CC	TT	CC	TT	CC	TT	--	TT	CC	CC	TT	--	TT	CC	TT
Gm03_1077329_C_T	Gm03	1094327	TC	CC	--	CC	TT	CC	CC	TT	TT	CC	CC	CC	TT	TT	CC	CC	TT	CC	CC	CC	CC	--	--	CC	CC	CC	CC	CC	CC	TT	CC	TT	TT	CC	TT	CC	TT	CC	CC	CC	TT	--	CC	TC	CC	TT	CC
Gm03_1209205_G_T	Gm03	1226007	--	GG	--	GG	TT	GG	GG	TT	TT	GG	GG	GG	TT	TT	GG	GG	TT	GG	GG	GG	GG	--	--	GG	GG	GG	GG	GG	GG	TT	GG	TT	TT	GG	TT	GG	TT	GG	GG	GG	TT	TT	GG	TG	GG	TT	GG
Gm03_1374930_T_G	Gm03	1396937	GG	GG	GG	GG	GG	GG	GG	GG	GG	GG	GG	GG	GG	GG	GG	GG	GG	GG	GG	GG	GG	GG	GG	GG	GG	GG	GG	GG	GG	GG	GG	GG	GG	GG	GG	GG	GG	GG	GG	GG	GG	GG	GG	GG	GG	GG	GG
Gm03_1441844_C_A	Gm03	1463842	CC	CC	CC	CC	CC	CC	CC	CC	CC	CC	CC	CC	CC	CC	CC	CC	CC	CC	CC	CC	CC	CC	CC	CC	CC	CC	CC	CC	CC	CC	CC	CC	CC	CC	CC	CC	CC	CC	CC	CC	CC	CC	CC	CC	CC	CC	CC
Gm03_1583754_T_C	Gm03	1605878	TC	TT	CC	TT	CC	TT	TT	TC	CC	TT	TT	TT	CC	CC	TT	TT	CC	TT	TT	TT	TT	--	TC	TT	TT	TT	TT	TT	TT	CC	TT	CC	CC	TT	TC	TT	CC	TT	--	TT	TT	CC	TT	--	TT	CC	TT
Gm03_1671384_C_A	Gm03	1693521	--	CC	AC	CC	AA	CC	CC	AC	AA	CC	CC	CC	AA	AA	CC	CC	AA	CC	CC	CC	CC	CC	CC	CC	CC	CC	CC	CC	CC	AA	CC	AA	AA	CC	--	CC	AA	CC	CC	CC	CC	AC	CC	AC	CC	AA	CC
Gm03_1718435_A_G	Gm03	1740572	AG	AA	GG	AA	GG	AA	AA	AG	GG	AA	AA	AA	GG	GG	AA	AA	GG	AA	AA	AA	AA	AA	--	AA	AA	AA	AA	AA	AA	GG	AA	GG	GG	AA	AG	AA	GG	AA	AA	AA	AA	GG	AA	AG	AA	GG	AA
Gm03_1926419_T_G	Gm03	1935727	TG	TT	GG	TT	GG	TT	TT	TG	GG	TT	TT	--	GG	GG	TT	TT	GG	TT	TT	TT	TT	--	TG	TT	TT	TT	TT	TT	TT	TT	TT	GG	GG	TT	TG	TT	GG	TT	--	TT	TT	GG	TT	--	TT	GG	TT
Gm03_1981847_C_T	Gm03	1991155	TC	CC	TT	CC	TT	CC	CC	TC	TT	CC	CC	CC	TT	TT	CC	CC	TT	CC	CC	CC	CC	CC	--	CC	CC	CC	CC	CC	CC	CC	CC	TT	TT	CC	TC	CC	TT	CC	CC	CC	CC	TT	CC	TC	CC	TT	CC
Gm03_2373742_T_C	Gm03	2383419	TC	CC	CC	TT	TT	TT	TT	TC	TT	TT	TT	TT	CC	CC	TT	CC	CC	TT	TT	TT	TT	TT	TC	TT	TT	TT	TT	TT	TT	TT	TT	CC	CC	TT	TC	CC	CC	TT	TT	TT	TT	CC	TT	--	TT	CC	TT
Gm03_2485916_T_C	Gm03	2495572	TT	TC	TC	TT	TT	TT	TT	TT	TT	TT	TT	TT	CC	CC	TT	--	CC	TT	TT	TT	TT	TT	TT	TT	TT	TT	TT	TT	TT	TT	TT	CC	CC	TT	TT	CC	CC	TT	TT	TT	TT	TC	TT	--	TT	CC	TT
Gm03_2818076_T_C	Gm03	2846377	TC	CC	--	TT	TT	TT	TT	TC	TT	TT	TT	TT	CC	CC	TT	--	CC	TT	TT	TT	TT	TT	--	TT	TT	TT	TT	TT	TT	TT	TT	CC	CC	TT	TC	CC	CC	TT	TT	TT	TT	--	TT	TC	TT	CC	TT
Gm03_2892089_C_T	Gm03	2921152	TC	TT	--	CC	CC	CC	CC	TC	CC	CC	CC	CC	TT	TT	CC	--	TT	CC	CC	CC	CC	CC	--	CC	CC	CC	CC	CC	CC	CC	CC	TT	TT	CC	TC	TT	TT	CC	CC	CC	CC	--	CC	TC	CC	TT	CC
Gm03_2932028_G_A	Gm03	2959509	GG	GG	GG	GG	GG	GG	GG	GG	GG	GG	GG	GG	GG	GG	GG	GG	GG	GG	GG	GG	GG	GG	GG	GG	GG	GG	GG	GG	GG	GG	GG	GG	GG	GG	GG	GG	GG	GG	GG	GG	GG	GG	GG	GG	GG	GG	GG
Gm03_3087237_A_G	Gm03	3115149	--	--	--	GG	GG	GG	GG	AG	GG	GG	GG	GG	AA	AA	GG	--	AA	GG	GG	GG	GG	GG	--	GG	GG	GG	GG	GG	GG	GG	GG	AA	AA	GG	GG	AA	AA	GG	GG	GG	GG	--	GG	AG	GG	AA	GG
Gm03_3225968_G_A	Gm03	3254065	AG	--	--	GG	GG	GG	GG	AG	GG	GG	GG	GG	AA	AA	GG	--	AA	GG	GG	GG	GG	GG	AG	GG	GG	GG	GG	GG	GG	GG	GG	AA	AA	GG	GG	AA	AA	GG	--	GG	GG	--	GG	AG	GG	AA	GG
Gm03_3562176_C_T	Gm03	3582559	TC	CC	CC	TT	TT	TT	TT	TC	TT	TT	TT	TT	CC	CC	TT	--	CC	TT	TT	TT	TT	TT	TC	TT	TT	TT	TT	TT	TT	TT	TT	CC	CC	TT	TT	CC	CC	TT	--	TT	TT	CC	TT	--	TT	CC	TT
Gm03_3618454_G_T	Gm03	3639127	GG	GG	GG	GG	GG	GG	GG	GG	GG	GG	GG	GG	GG	GG	GG	GG	GG	GG	GG	GG	GG	GG	GG	GG	GG	GG	GG	GG	GG	GG	GG	GG	GG	GG	GG	GG	GG	GG	GG	GG	GG	GG	GG	GG	GG	GG	GG
Gm03_3828735_G_A	Gm03	3849214	AG	AA	--	GG	GG	GG	GG	AG	GG	GG	GG	GG	AA	AA	GG	--	AA	GG	GG	GG	GG	GG	--	GG	GG	GG	GG	GG	GG	GG	GG	AA	AA	GG	GG	AA	AA	GG	GG	GG	GG	--	GG	AG	GG	AA	GG
Gm03_4468196_C_T	Gm03	4277380	--	--	--	CC	TT	CC	CC	TC	CC	CC	CC	--	TT	TT	CC	--	TT	CC	CC	CC	CC	CC	--	CC	CC	CC	CC	CC	CC	CC	CC	TT	TT	CC	CC	TT	TT	CC	CC	CC	CC	--	CC	TC	CC	TT	CC
Gm03_4578272_G_A	Gm03	4387476	AA	AA	AA	AA	AA	AA	AA	AA	AA	AA	AA	AA	AA	AA	AA	AA	AA	AA	AA	AA	AA	AA	AA	AA	AA	AA	AA	AA	AA	AA	AA	AA	AA	AA	AA	AA	AA	AA	AA	AA	AA	AA	AA	AA	AA	AA	AA
Gm03_4665923_C_T	Gm03	4475124	TT	TT	TT	TT	TT	TT	TT	TT	TT	TT	TT	TT	TT	TT	TT	TT	TT	TT	TT	TT	TT	TT	TT	TT	TT	TT	TT	TT	TT	TT	TT	TT	TT	TT	TT	TT	TT	TT	TT	TT	TT	TT	TT	TT	TT	TT	TT
Gm03_4718162_C_A	Gm03	4527306	CC	CC	CC	CC	CC	CC	CC	CC	CC	CC	CC	CC	CC	CC	CC	CC	CC	CC	CC	CC	CC	CC	CC	CC	CC	CC	CC	CC	CC	CC	CC	CC	CC	CC	CC	CC	CC	CC	CC	CC	CC	CC	CC	CC	CC	CC	CC
Gm03_4782127_T_C	Gm03	4591270	--	TT	TT	TC	TT	CC	CC	--	--	CC	CC	TC	TT	TT	CC	TT	TT	TC	CC	CC	CC	CC	--	CC	CC	CC	CC	CC	CC	CC	CC	TT	TT	CC	CC	TT	TT	CC	TC	CC	CC	TT	CC	TT	CC	TT	CC
Gm03_4833386_A_G	Gm03	4642708	GG	GG	GG	GG	GG	GG	GG	GG	GG	GG	GG	GG	GG	GG	GG	GG	GG	GG	GG	GG	GG	GG	GG	GG	GG	GG	GG	GG	GG	GG	GG	GG	GG	GG	GG	GG	GG	GG	GG	GG	GG	GG	GG	GG	GG	GG	GG
Gm03_5106459_T_G	Gm03	5009334	TG	GG	GG	--	GG	TT	--	--	--	TT	TT	TT	GG	GG	TT	GG	GG	--	TT	TT	TT	TT	--	TT	TT	TT	TT	TT	TT	TT	TT	GG	GG	TT	TT	GG	GG	TT	TG	TT	TT	GG	TT	--	TT	GG	TT
Gm03_5217414_C_T	Gm03	5120291	TC	TT	TT	CC	TT	CC	CC	TT	CC	CC	CC	CC	TT	TT	CC	TT	TT	CC	CC	CC	CC	CC	TC	CC	CC	CC	CC	CC	CC	CC	CC	TT	TT	CC	CC	TT	TT	CC	CC	CC	CC	TT	CC	--	CC	TT	CC
Gm03_5341695_A_G	Gm03	5244122	AG	GG	GG	AA	GG	AA	AA	GG	AA	AA	AA	AG	GG	GG	AA	GG	GG	AA	AA	AA	AA	AA	AG	AA	AA	AA	AG	AA	AA	AA	AA	GG	GG	AA	AA	GG	GG	AA	--	AA	AA	GG	AA	--	AA	GG	AA
Gm03_5451606_A_C	Gm03	5354087	AC	AA	AA	CC	AA	CC	CC	AA	CC	CC	CC	CC	AA	AA	CC	--	AA	CC	CC	CC	CC	CC	AC	CC	CC	CC	AC	CC	CC	CC	CC	AA	AA	CC	CC	AA	AA	CC	--	CC	CC	AA	CC	--	CC	AA	CC
Gm03_5502496_T_C	Gm03	5405718	--	CC	CC	TT	CC	TT	TT	CC	TT	TT	TT	TT	CC	CC	TT	CC	CC	TT	TT	TT	TT	TT	--	TT	CC	TT	TC	TT	TT	TT	TT	CC	CC	TT	TT	CC	CC	TT	--	TT	TT	CC	TT	TC	TT	CC	TT
Gm03_5796468_A_G	Gm03	5652619	AA	AA	AA	AA	AA	AA	AA	AA	AA	AA	AA	AA	AA	AA	AA	AA	AA	AA	AA	AA	AA	AA	AA	AA	AA	AA	AA	AA	AA	AA	AA	AA	AA	AA	AA	AA	AA	AA	AA	AA	AA	AA	AA	AA	AA	AA	AA
Gm03_6459920_A_G	Gm03	6278920	AA	AA	AA	AA	AA	AA	AA	AA	AA	AA	AA	AA	AA	AA	AA	AA	AA	AA	AA	AA	AA	AA	AA	AA	AA	AA	AA	AA	AA	AA	AA	AA	AA	AA	AA	AA	AA	AA	AA	AA	AA	AA	AA	AA	AA	AA	AA
Gm03_6631189_A_G	Gm03	6477854	AA	AA	AA	AA	AA	AA	AA	AA	AA	AA	AA	AA	AA	AA	AA	AA	AA	AA	AA	AA	AA	AA	AA	AA	AA	AA	AA	AA	AA	AA	AA	AA	AA	AA	AA	AA	AA	AA	AA	AA	AA	AA	AA	AA	AA	AA	AA
Gm03_8003327_T_C	Gm03	7650316	CC	CC	CC	CC	CC	CC	CC	CC	CC	CC	CC	CC	CC	CC	CC	CC	CC	CC	CC	CC	CC	CC	CC	CC	CC	CC	CC	CC	CC	CC	--	CC	CC	CC	CC	CC	CC	CC	CC	CC	CC	CC	CC	CC	CC	CC	CC
Gm03_9789580_G_T	Gm03	9259491	--	GG	GG	TT	GG	TG	--	GG	--	GG	GG	--	GG	GG	GG	GG	GG	TG	TT	TT	TT	TT	GG	TG	GG	TT	--	TT	TT	GG	TG	GG	TT	TT	GG	GG	GG	GG	GG	TT	TT	GG	TG	--	TT	GG	GG
Gm03_21347065_C_T	Gm03	17644304	TC	--	TT	CC	TT	--	CC	TT	CC	TT	TC	--	TT	TT	TT	TT	TT	CC	CC	CC	CC	CC	TC	--	TT	CC	TC	CC	CC	TT	CC	TT	CC	CC	TT	TT	TT	--	--	CC	CC	TC	CC	TC	CC	TT	TT
Gm03_18512439_C_T	Gm03	19258162	CC	CC	CC	CC	CC	CC	CC	CC	CC	CC	CC	CC	CC	CC	CC	CC	CC	CC	CC	CC	CC	CC	CC	CC	CC	CC	CC	CC	CC	CC	CC	CC	CC	CC	CC	CC	CC	CC	CC	CC	CC	CC	CC	CC	CC	CC	CC
Gm03_18254831_C_T	Gm03	19515793	CC	CC	CC	CC	CC	CC	CC	CC	CC	CC	CC	CC	CC	CC	CC	CC	CC	CC	CC	CC	CC	CC	CC	CC	CC	CC	CC	CC	CC	CC	CC	CC	CC	CC	CC	CC	CC	CC	CC	CC	CC	CC	CC	CC	CC	CC	CC
Gm03_16612828_A_G	Gm03	21157163	AA	AA	AA	AA	AA	AA	AA	AA	AA	AA	AA	AA	AA	AA	AA	AA	AA	AA	AA	AA	AA	AA	AA	AA	AA	AA	AA	AA	AA	AA	AA	AA	AA	AA	AA	AA	AA	AA	AA	AA	AA	AA	AA	AA	AA	AA	AA
Gm03_16281390_A_G	Gm03	21531602	AA	AA	AA	AA	AA	AA	AA	AA	AA	AA	AA	AA	AA	AA	AA	AA	AA	AA	AA	AA	AA	AA	AA	AA	AA	AA	AA	AA	AA	AA	AA	AA	AA	AA	AA	AA	AA	AA	AA	AA	AA	AA	AA	AA	AA	AA	AA
Gm03_25818759_T_C	Gm03	23866074	TT	TT	TT	TT	TT	TT	TT	TT	TT	TT	TT	TT	TT	TT	TT	TT	TT	TT	TT	TT	TT	TT	TT	TT	TT	TT	TT	TT	TT	TT	TT	TT	TT	TT	TT	TT	TT	TT	TT	TT	TT	TT	TT	TT	TT	TT	TT
Gm03_27021460_A_G	Gm03	25030381	AA	AA	AA	AA	AA	AA	AA	AA	AA	AA	AA	AA	AA	AA	AA	AA	AA	AA	AA	AA	AA	AA	AA	AA	AA	AA	AA	AA	AA	AA	AA	AA	AA	AA	AA	AA	AA	AA	AA	AA	AA	AA	AA	AA	AA	AA	AA
Gm03_27285377_A_G	Gm03	25293976	AA	AA	AA	AA	AA	AA	AA	AA	AA	AA	AA	AA	AA	AA	AA	AA	AA	AA	AA	AA	AA	AA	AA	AA	AA	AA	AA	AA	AA	AA	AA	AA	AA	AA	AA	AA	AA	AA	AA	AA	AA	AA	AA	AA	AA	AA	AA
Gm03_28015945_T_C	Gm03	26026062	TT	TT	TT	TT	TT	TT	TT	TT	TT	TT	TT	TT	TT	TT	TT	TT	TT	TT	TT	TT	TT	TT	TT	TT	TT	TT	TT	TT	TT	TT	TT	TT	TT	TT	TT	TT	TT	TT	TT	TT	TT	TT	TT	TT	TT	TT	TT
Gm03_28414908_A_G	Gm03	26426492	AA	AA	AA	AA	AA	AA	AA	AA	AA	AA	AA	AA	AA	AA	AA	AA	AA	AA	AA	AA	AA	AA	AA	AA	AA	AA	AA	AA	AA	AA	AA	AA	AA	AA	AA	AA	AA	AA	AA	AA	AA	AA	AA	AA	AA	AA	AA
Gm03_29074893_T_C	Gm03	27095330	TT	TT	TT	TT	TT	TT	TT	TT	TT	TT	TT	TT	TT	TT	TT	TT	TT	TT	TT	TT	TT	TT	TT	TT	TT	TT	TT	TT	TT	TT	TT	TT	TT	TT	TT	TT	TT	TT	TT	TT	TT	TT	TT	TT	TT	TT	TT
Gm03_29375217_T_C	Gm03	27395084	TT	TT	TT	TT	TT	TT	TT	TT	TT	TT	TT	TT	TT	TT	TT	TT	TT	TT	TT	TT	TT	TT	TT	TT	TT	TT	TT	TT	TT	TT	TC	TT	TT	TT	TT	TT	TT	TT	TT	TT	TT	TT	TT	TT	TT	TT	TT
Gm03_29628783_T_C	Gm03	27658954	TT	TT	TT	TT	TT	TT	TT	TT	TT	TT	TT	TT	TT	TT	TT	TT	TT	TT	TT	TT	TT	TT	TT	TT	TT	TT	TT	TT	TT	TT	TT	TT	TT	TT	TT	TT	TT	TT	TT	TT	TT	TT	TT	TT	TT	TT	TT
Gm03_29817747_G_T	Gm03	27847719	GG	GG	GG	GG	GG	GG	GG	GG	GG	GG	GG	GG	GG	GG	GG	GG	GG	GG	GG	GG	GG	GG	GG	GG	GG	GG	GG	GG	GG	GG	GG	GG	GG	GG	GG	GG	GG	GG	GG	GG	GG	GG	GG	GG	GG	GG	GG
Gm03_30529089_A_C	Gm03	28503087	--	CC	CC	AA	CC	AA	AA	CC	AA	CC	CC	AA	CC	AA	CC	CC	CC	AA	AA	AA	AA	AA	AC	CC	CC	AA	AC	AA	AA	AA	AA	CC	AA	CC	CC	CC	CC	CC	CC	AA	AA	CC	AA	--	AA	CC	CC
Gm03_30809885_T_C	Gm03	28783977	--	TT	TT	CC	TT	--	CC	TT	CC	TT	TT	CC	TT	CC	TT	TT	TT	CC	CC	CC	CC	CC	TC	TT	TT	CC	TC	CC	CC	CC	CC	TT	CC	TT	TT	TT	TT	TT	TT	CC	CC	TT	CC	--	CC	TT	TT
Gm03_30955790_A_G	Gm03	28942195	--	GG	GG	AA	GG	AA	AA	GG	AA	GG	GG	--	GG	AA	GG	GG	GG	AA	AA	AA	AA	AA	AG	GG	GG	AA	AG	AA	AA	AA	AA	GG	AA	GG	GG	GG	GG	GG	GG	AA	AA	GG	AA	--	AA	GG	GG
Gm03_31711487_A_G	Gm03	29653628	AG	AG	GG	AA	GG	AA	AA	GG	AA	GG	AG	AA	GG	AA	GG	GG	GG	AA	AA	AA	AA	AA	--	GG	GG	AA	--	AA	AA	AA	AA	GG	AA	GG	GG	GG	GG	GG	GG	AA	AA	--	AA	--	AA	GG	GG
Gm03_35201990_G_A	Gm03	33161483	GG	--	AG	GG	AA	GG	GG	AA	--	GG	GG	GG	AA	GG	AA	AG	AA	GG	GG	GG	GG	GG	--	GG	AA	GG	AA	GG	GG	GG	GG	GG	AA	AA	GG	AA	AA	GG	GG	AA	GG	AA	GG	AG	GG	AA	GG
Gm03_35330372_G_T	Gm03	33292135	TT	GG	GG	TT	GG	TT	TT	GG	GG	TT	TT	--	GG	TT	GG	GG	GG	TT	TT	TT	TT	TT	GG	TT	GG	TT	GG	TT	TT	TT	TT	TT	GG	GG	TT	GG	GG	TT	TT	GG	TT	GG	TT	GG	TT	GG	TT
Gm03_35516341_C_T	Gm03	33477340	CC	CC	CC	CC	CC	CC	CC	CC	CC	CC	CC	CC	CC	CC	CC	CC	CC	CC	CC	CC	CC	CC	CC	CC	CC	CC	CC	CC	CC	CC	CC	CC	CC	CC	CC	CC	CC	CC	CC	CC	CC	CC	CC	CC	CC	CC	CC
Gm03_35913889_T_C	Gm03	33884116	CC	CC	CC	CC	CC	CC	CC	CC	CC	CC	CC	CC	CC	CC	CC	CC	CC	CC	CC	CC	CC	CC	CC	CC	CC	CC	CC	CC	CC	CC	CC	CC	CC	CC	CC	CC	CC	CC	CC	CC	CC	CC	CC	CC	CC	CC	CC
Gm03_35968599_G_A	Gm03	33938840	AA	AA	AA	AA	AA	AA	AA	AA	AA	AA	AA	AA	AA	AA	AA	AA	AA	AA	AA	AA	AA	AA	AA	AA	AA	AA	AA	AA	AA	AA	AA	AA	AA	AA	AA	AA	AA	AA	AA	AA	AA	AA	AA	AA	AA	AA	AA
Gm03_36058927_T_C	Gm03	34029176	TT	TT	TT	TT	TT	TT	TT	TT	TT	TT	TT	TT	TT	TT	TT	TT	TT	TT	TT	TT	TT	TT	TT	TT	TT	TT	TT	TT	TT	TT	TT	TT	TT	TT	TT	TT	TT	TT	TT	TT	TT	TT	TT	TT	TT	TT	TT
Gm03_36178327_G_A	Gm03	34147379	GG	GG	GG	GG	GG	GG	GG	GG	GG	GG	GG	GG	GG	GG	GG	GG	GG	GG	GG	GG	GG	GG	GG	GG	GG	GG	GG	GG	GG	GG	GG	GG	GG	GG	GG	GG	GG	GG	GG	GG	GG	GG	GG	GG	GG	GG	GG
Gm03_36386316_G_A	Gm03	34364354	AA	AA	AA	AA	AA	AA	AA	AA	AA	AA	AA	AA	AA	AA	AA	AA	AA	AA	AA	AA	AA	AA	AA	AA	AA	AA	AA	AA	AA	AA	AA	AA	AA	AA	AA	AA	AA	AA	AA	AA	AA	AA	AA	AA	AA	AA	AA
Gm03_36396038_A_C	Gm03	34374076	CC	CC	CC	CC	CC	CC	CC	CC	CC	CC	CC	CC	CC	CC	CC	CC	CC	CC	CC	CC	CC	CC	CC	CC	CC	CC	CC	CC	CC	CC	CC	CC	CC	CC	CC	CC	CC	CC	CC	CC	CC	CC	CC	CC	CC	CC	CC
Gm03_36438792_G_T	Gm03	34416830	TT	TT	TT	TT	TT	TT	TT	TT	TT	TT	TT	TT	TT	TT	TT	TT	TT	TT	TT	TT	TT	TT	TT	TT	TT	TT	TT	TT	TT	TT	TT	TT	TT	TT	TT	TT	TT	TT	TT	TT	TT	TT	TT	TT	TT	TT	TT
Gm03_36634361_G_A	Gm03	34612476	--	GG	GG	AA	GG	GG	AA	GG	GG	AA	AA	GG	GG	AA	AA	GG	GG	GG	GG	GG	GG	AA	AA	AA	GG	AA	GG	GG	AA	AA	AA	AA	GG	GG	AA	GG	GG	AA	AA	AA	AA	GG	AA	AA	AA	GG	AA
Gm03_36714581_T_C	Gm03	34692693	CC	CC	CC	CC	CC	CC	CC	CC	CC	CC	CC	CC	CC	CC	CC	CC	CC	CC	CC	CC	CC	CC	CC	CC	CC	CC	CC	CC	CC	CC	CC	CC	CC	CC	CC	CC	CC	CC	CC	CC	CC	CC	CC	CC	CC	CC	CC
Gm03_36816006_A_G	Gm03	34791858	GG	GG	GG	GG	GG	GG	GG	GG	GG	GG	GG	GG	GG	GG	GG	GG	GG	GG	GG	GG	GG	GG	GG	GG	GG	GG	GG	GG	GG	GG	GG	GG	GG	GG	GG	GG	GG	GG	GG	GG	GG	GG	GG	GG	GG	GG	GG
Gm03_36863476_C_A	Gm03	34839398	AA	AA	AA	AA	AA	AA	AA	AA	AA	AA	AA	AA	AA	AA	AA	AA	AA	AA	AA	AA	AA	AA	AC	AA	AA	AA	AA	AA	AA	AA	AA	AA	AA	AA	AA	AA	AA	AA	AA	AA	AA	AA	AA	AA	AA	AA	AA
Gm03_36969159_A_G	Gm03	34945081	GG	GG	GG	GG	GG	GG	GG	GG	GG	GG	GG	GG	GG	GG	GG	GG	GG	GG	GG	GG	GG	GG	GG	GG	GG	GG	GG	GG	GG	GG	GG	GG	GG	GG	GG	GG	GG	GG	GG	GG	GG	GG	GG	GG	GG	GG	GG
Gm03_37024877_C_T	Gm03	35000799	TC	TT	TT	CC	TT	TT	CC	TT	TT	CC	CC	TT	TT	CC	CC	TT	TT	TT	TT	TT	TT	CC	CC	CC	TT	CC	TT	TT	CC	CC	CC	CC	TT	TT	CC	TT	TT	CC	CC	CC	CC	TT	CC	CC	CC	TT	CC
Gm03_37146641_T_C	Gm03	35121187	--	CC	TC	TT	CC	CC	TT	TT	--	TT	TT	CC	CC	TT	TT	TC	CC	--	TC	CC	CC	TT	TT	TT	CC	TT	CC	CC	TT	TT	TT	TT	CC	CC	TT	CC	CC	TT	TT	CC	TT	CC	TT	TT	TT	CC	TT
Gm03_37245981_T_C	Gm03	35219106	--	CC	CC	TT	CC	CC	TT	TT	CC	TT	TT	CC	CC	TT	TT	CC	CC	CC	CC	CC	CC	TT	TT	TT	CC	TT	CC	CC	TT	TT	TT	TT	CC	CC	TT	CC	CC	TT	TT	CC	TT	CC	TT	TT	TT	CC	TT
Gm03_37286104_T_C	Gm03	35259229	CC	CC	CC	CC	CC	CC	CC	CC	CC	CC	CC	CC	CC	CC	CC	CC	CC	CC	CC	CC	CC	CC	CC	CC	CC	CC	CC	CC	CC	CC	CC	CC	CC	CC	CC	CC	CC	CC	CC	CC	CC	CC	CC	CC	CC	CC	CC
Gm03_37326508_A_G	Gm03	35299633	GG	GG	GG	GG	GG	GG	GG	GG	GG	GG	GG	GG	GG	GG	GG	GG	GG	GG	GG	GG	GG	GG	GG	GG	GG	GG	GG	GG	GG	GG	GG	GG	GG	GG	GG	GG	GG	GG	GG	GG	GG	GG	GG	GG	GG	GG	GG
Gm03_37366357_C_A	Gm03	35339482	AA	AA	AA	AA	AA	AA	AA	AA	AA	AA	AA	AA	AA	AA	AA	AA	AA	AA	AA	AA	AA	AA	AA	AA	AA	AA	AA	AA	AA	AA	AA	AA	AA	AA	AA	AA	AA	AA	AA	AA	AA	AA	AA	AA	AA	AA	AA
Gm03_37432542_C_A	Gm03	35405797	AA	AA	AA	AA	AA	AA	AA	AA	AA	AA	AA	AA	AA	AA	AA	AA	AA	AA	AA	AA	AA	AA	AA	AA	AA	AA	AA	AA	AA	AA	AA	AA	AA	AA	AA	AA	AA	AA	AA	AA	AA	AA	AA	AA	AA	AA	AA
Gm03_37488779_G_A	Gm03	35462187	AA	AA	AA	AA	AA	AA	AA	AA	AA	AA	AA	AA	AA	AA	AA	AA	AA	AA	AA	AA	AA	AA	--	AA	AA	AA	AA	AA	AA	AA	AA	AA	AA	AA	AA	AA	AA	AA	AA	AA	AA	AA	AA	AA	AA	AA	AA
Gm03_37654429_G_T	Gm03	35627836	--	GG	GG	TT	GG	GG	TT	TT	GG	TT	TT	GG	GG	TT	TT	GG	GG	GG	GG	TT	GG	TT	--	TT	GG	TT	GG	GG	TT	TT	TT	TT	GG	TT	TT	GG	GG	TT	TT	GG	TT	GG	TT	TT	TT	GG	TT
Gm03_37711069_G_A	Gm03	35684476	GG	GG	GG	GG	GG	GG	GG	GG	GG	GG	GG	GG	GG	GG	GG	GG	GG	GG	GG	GG	GG	GG	GG	GG	GG	GG	GG	GG	GG	GG	GG	GG	GG	GG	GG	GG	GG	GG	GG	GG	GG	GG	GG	GG	GG	GG	GG
Gm03_37773419_C_T	Gm03	35747077	--	TT	TC	CC	TT	TT	CC	CC	TT	CC	CC	TT	TT	CC	CC	TC	TT	TT	--	--	TT	CC	--	CC	TT	CC	TT	TT	CC	CC	CC	CC	TT	CC	CC	TT	TT	CC	CC	TT	CC	TT	CC	CC	CC	TT	CC
Gm03_37819433_T_C	Gm03	35793091	--	CC	TT	TT	CC	CC	TT	TT	CC	TT	TT	CC	CC	TT	TT	--	CC	CC	CC	--	CC	TT	--	TT	CC	TT	CC	CC	TT	TT	TT	TT	CC	TT	TT	CC	CC	TT	TT	CC	TT	CC	TT	TT	TT	CC	TT
Gm03_37902930_C_T	Gm03	35876483	TT	TT	TT	TT	TT	TT	TT	TT	TT	TT	TT	TT	TT	TT	TT	TT	TT	TT	TT	TT	TT	TT	TT	TT	TT	TT	TT	TT	TT	TT	TT	TT	TT	TT	TT	TT	TT	TT	TT	TT	TT	TT	TT	TT	TT	TT	TT
Gm03_37963252_A_G	Gm03	35936805	GG	GG	GG	GG	GG	GG	GG	GG	GG	GG	GG	GG	GG	GG	GG	GG	GG	GG	GG	GG	GG	GG	GG	GG	GG	GG	GG	GG	GG	GG	GG	GG	GG	GG	GG	GG	GG	GG	GG	GG	GG	GG	GG	GG	GG	GG	GG
Gm03_38069022_A_G	Gm03	36042575	GG	GG	GG	GG	GG	GG	GG	GG	GG	GG	GG	GG	GG	GG	GG	GG	GG	GG	GG	GG	GG	GG	GG	GG	GG	GG	GG	GG	GG	GG	GG	GG	GG	GG	GG	GG	GG	GG	GG	GG	GG	GG	GG	GG	GG	GG	GG
Gm03_38121627_T_C	Gm03	36095180	CC	CC	CC	CC	CC	CC	CC	CC	CC	CC	CC	CC	CC	CC	CC	CC	CC	CC	CC	CC	CC	CC	CC	CC	CC	CC	CC	CC	CC	CC	CC	CC	CC	CC	CC	CC	CC	CC	CC	CC	CC	CC	CC	CC	CC	CC	CC
Gm03_38173815_A_C	Gm03	36147368	--	CC	AA	AA	CC	CC	AA	AA	CC	AA	AA	CC	CC	AA	CC	--	CC	--	CC	CC	CC	AA	AA	AA	CC	AA	CC	CC	AA	AA	AA	AA	CC	AA	AA	CC	--	AA	AA	CC	AA	AA	AA	AA	AA	CC	AA
Gm03_38263112_A_G	Gm03	36237017	AA	AA	AA	AA	AA	AA	AA	AA	AA	AA	AA	AA	AA	AA	AA	AA	AA	AA	AA	AA	AA	AA	AA	AA	AA	AA	AA	AA	AA	AA	AA	AA	AA	AA	AA	AA	AA	AA	AA	AA	AA	AA	AA	AA	AA	AA	AA
Gm03_38415618_T_G	Gm03	36395079	--	GG	TG	TG	GG	GG	TG	TG	GG	TG	TG	GG	GG	TG	GG	GG	GG	GG	GG	GG	GG	TG	TG	TG	GG	TG	GG	GG	TG	TG	TG	TG	GG	TG	TG	GG	--	TG	TG	GG	TG	TG	TG	TG	TG	GG	TG
Gm03_38526701_A_G	Gm03	36506727	AG	GG	AA	AA	GG	GG	AA	AA	AA	AA	AA	GG	GG	AA	GG	GG	GG	GG	GG	GG	GG	AA	AA	AA	GG	AA	GG	GG	AA	AA	AA	AA	AA	AA	AA	GG	AG	AA	AA	GG	AA	AA	AA	AA	AA	GG	AA
Gm03_38761991_G_T	Gm03	36745144	--	TT	GG	GG	TT	TG	GG	GG	GG	GG	GG	TT	TT	GG	TT	TG	TT	TG	--	TT	TT	GG	GG	GG	TT	GG	TT	TT	GG	GG	GG	GG	GG	GG	GG	TT	--	GG	GG	TT	GG	GG	GG	GG	GG	TT	GG
Gm03_38931849_C_A	Gm03	36914473	AC	AA	CC	CC	AA	AA	CC	CC	CC	CC	CC	AA	AA	CC	AA	AA	AA	AA	AA	AA	AA	CC	CC	CC	AA	CC	AA	AA	CC	CC	CC	CC	CC	CC	CC	AA	AC	CC	CC	AA	CC	CC	CC	CC	CC	AA	CC
Gm03_38976026_C_T	Gm03	36959274	CC	CC	CC	CC	CC	CC	CC	CC	CC	CC	CC	CC	CC	CC	CC	CC	CC	CC	CC	CC	CC	CC	CC	CC	CC	CC	CC	CC	CC	CC	CC	CC	CC	CC	CC	CC	CC	CC	CC	CC	CC	CC	CC	CC	CC	CC	CC
Gm03_39796778_T_G	Gm03	37779807	TT	TT	TT	TT	TT	TT	TT	TT	TT	TT	TT	TT	TT	TT	TT	TT	TT	TT	TT	TT	TT	TT	TT	TT	TT	TT	TT	TT	TT	TT	TT	TT	TT	TT	TT	TT	TT	TT	TT	TT	TT	TT	TT	TT	TT	TT	TT
Gm03_39843152_T_C	Gm03	37826181	TT	TT	TT	TT	TT	TT	TT	TT	TT	TT	TT	TT	TT	TT	TT	TT	TT	TT	TT	TT	TT	TT	TT	TT	TT	TT	TT	TT	TT	TT	TT	TT	TT	TT	TT	TT	TT	TT	TT	TT	TT	TT	TT	TC	TT	TT	TT
Gm03_39945298_T_C	Gm03	37930633	TT	TT	TT	TT	TT	TT	TT	TT	TT	TT	TT	TT	TT	TT	TT	TT	TT	TT	TT	TT	TT	TT	TT	TT	TT	TT	TT	TT	TT	TT	TT	TT	TT	TT	TT	TT	TT	TT	TT	TT	TT	TT	TT	TT	TT	TT	TT
Gm03_39998708_A_G	Gm03	37984044	AA	AA	AA	AA	AA	AA	AA	AA	AA	AA	AA	AA	AA	AA	AA	AA	AA	AA	AA	AA	AA	AA	AA	AA	AA	AA	AA	AA	AA	AA	--	AA	AA	AA	AA	AA	AA	AA	AA	AA	AA	AA	AA	AG	AA	AA	AA
Gm03_40052612_T_C	Gm03	38037948	TT	TT	TT	TT	TT	TT	TT	TT	TT	TT	TT	TT	TT	TT	TT	TT	TT	TT	TT	TT	TT	TT	TT	TT	TT	TT	TT	TT	TT	TT	TT	TT	TT	TT	TT	TT	TT	TT	TT	TT	TT	TT	TT	--	TT	TT	TT
Gm03_40115297_C_T	Gm03	38100814	--	CC	TC	TT	CC	TT	TT	CC	TT	TT	TT	CC	CC	TT	CC	CC	TT	CC	CC	CC	CC	TT	TT	TT	TT	TT	TT	CC	TT	TT	TT	TT	TT	TT	TT	CC	CC	TT	TT	CC	TT	CC	TT	TC	TT	CC	TT
Gm03_40197155_A_C	Gm03	38183067	--	--	--	CC	AA	CC	CC	AA	CC	CC	CC	AA	AA	--	AA	--	CC	AA	--	AA	AA	CC	CC	CC	CC	CC	CC	AA	CC	CC	CC	CC	CC	CC	CC	AA	AA	CC	CC	AA	CC	AA	CC	CC	CC	AA	CC
Gm03_40270199_T_C	Gm03	38256161	TT	TT	TT	TT	TT	TT	TT	TT	TT	TT	TT	TT	TT	TT	TT	TT	TT	TT	TT	TT	TT	TT	TT	TT	TT	TT	TT	TT	TT	TT	TT	TT	TT	TT	TT	TT	TT	TT	TT	TT	TT	TT	TT	TC	TT	TT	TT
Gm03_40613405_T_C	Gm03	38601323	--	TT	--	CC	TT	CC	CC	TT	CC	CC	CC	TT	TT	TC	TT	--	CC	TT	TT	TT	TT	CC	CC	CC	CC	CC	CC	TT	TT	CC	CC	CC	CC	CC	CC	TT	TT	CC	CC	TT	CC	TT	CC	CC	CC	TT	CC
Gm03_40663609_G_A	Gm03	38651529	AG	GG	AG	AA	GG	AA	AA	GG	AA	AA	AA	GG	GG	AG	GG	GG	AA	GG	GG	GG	GG	AA	AA	AA	AA	AA	AA	GG	GG	AA	AA	AA	AA	AA	AA	GG	GG	AA	AA	GG	AA	GG	AA	AA	AA	GG	AA
Gm03_40727780_A_G	Gm03	38716240	--	--	--	GG	AA	GG	GG	AA	GG	GG	GG	AA	AA	--	AA	AG	GG	AA	--	AA	AA	GG	GG	GG	GG	GG	GG	AA	AA	GG	GG	GG	GG	GG	GG	AA	AA	GG	GG	AA	GG	AA	GG	--	GG	AA	GG
Gm03_41020834_T_C	Gm03	39009305	CC	CC	CC	CC	CC	CC	CC	CC	CC	CC	CC	CC	CC	CC	CC	CC	CC	CC	CC	CC	CC	CC	CC	CC	CC	CC	CC	CC	CC	CC	CC	CC	CC	CC	CC	CC	CC	CC	CC	CC	CC	CC	CC	CC	CC	CC	CC
Gm03_41135466_C_T	Gm03	39123205	TT	TT	TT	TT	TT	TT	TT	TT	TT	TT	TT	TT	TT	TT	TT	TT	TT	TT	TT	TT	TT	TT	TT	TT	TT	TT	TT	TT	TT	TT	--	TT	TT	TT	TT	TT	TT	TT	TT	TT	TT	TT	TT	TC	TT	TT	TT
Gm03_41305199_G_A	Gm03	39292939	--	GG	AG	AA	GG	AA	AA	GG	AA	AA	AA	GG	GG	--	GG	GG	AA	GG	GG	GG	GG	AA	AG	AA	AA	AA	AA	GG	GG	AA	AA	AA	AA	AA	AA	GG	GG	AA	AA	GG	AA	GG	AA	AG	AA	GG	AA
Gm03_42308865_C_T	Gm03	40297110	TC	CC	--	TT	TT	TT	TT	TT	TT	TT	TT	--	TT	TC	CC	TC	TT	CC	CC	CC	CC	TT	TT	TT	TT	TT	CC	CC	CC	TT	TT	TT	TT	TT	TT	TT	TT	TT	TT	CC	TT	CC	TT	TT	TT	TT	TT
Gm03_43525455_A_G	Gm03	41512333	AA	AA	AA	AA	AA	AA	AA	AA	AA	AA	AA	AA	AA	AA	AA	AA	AA	AA	AA	AA	AA	AA	AA	AA	AA	AA	AA	AA	AA	AA	AA	AA	AA	AA	AA	AA	AA	AA	AA	AA	AA	AA	AA	AA	AA	AA	AA
Gm03_43599557_T_C	Gm03	41595432	TT	TT	TT	TT	TT	TT	TT	TT	TT	TT	TT	TT	TT	TT	TT	TT	TT	TT	TT	TT	TT	TT	TT	TT	TT	TT	TT	TT	TT	TT	TT	TT	TT	TT	TT	TT	TT	TT	TT	TT	TT	TT	TT	TT	TT	TT	TT
Gm03_43707104_A_G	Gm03	41703528	AA	AA	AA	AA	AA	AA	AA	AA	AA	AA	AA	AA	AA	AA	AA	AA	AA	AA	AA	AA	AA	AA	AA	AA	AA	AA	AA	AA	AA	AA	AA	AA	AA	AA	AA	AA	AA	AA	AA	AA	AA	AA	AA	AA	AA	AA	AA
Gm03_44019995_G_A	Gm03	42016419	GG	GG	GG	GG	GG	GG	GG	GG	GG	GG	GG	GG	GG	GG	GG	GG	GG	GG	GG	GG	GG	GG	GG	GG	GG	GG	GG	GG	GG	GG	GG	GG	GG	GG	GG	GG	GG	GG	GG	GG	GG	GG	GG	GG	GG	GG	GG
Gm03_44171693_A_C	Gm03	42168117	AA	AA	AA	AA	AA	AA	AA	AA	AA	AA	AA	AA	AA	AA	AA	AA	AA	AA	AA	AA	AA	AA	AA	AA	AA	AA	AA	AA	AA	AA	AA	AA	AA	AA	AA	AA	AA	AA	AA	AA	AA	AA	AA	AC	AA	AA	AA
Gm03_44326930_A_G	Gm03	42323509	AA	AA	AA	AA	AA	AA	AA	AA	AA	AA	AA	AA	AA	AA	AA	AA	AA	AA	AA	AA	AA	AA	AA	AA	AA	AA	AA	AA	AA	AA	AA	AA	AA	AA	AA	AA	AA	AA	AA	AA	AA	AA	AA	AA	AA	AA	AA
Gm03_44381016_G_T	Gm03	42377595	GG	GG	GG	GG	GG	GG	GG	GG	GG	GG	GG	GG	GG	GG	GG	GG	GG	GG	GG	GG	GG	GG	GG	GG	GG	GG	GG	GG	GG	GG	GG	GG	GG	GG	GG	GG	GG	GG	GG	GG	GG	GG	GG	GG	GG	GG	GG
Gm03_44693761_T_C	Gm03	42687085	TT	TT	TT	TT	TT	TT	TT	TT	TT	TT	TT	TT	TT	TT	TT	TT	TT	TT	TT	TT	TT	TT	TT	TT	TT	TT	TT	TT	TT	TT	TT	TT	TT	TT	TT	TT	TT	TT	TT	TT	TT	TT	TT	TC	TT	TT	TT
Gm03_44920668_A_G	Gm03	42913709	GG	GG	GG	GG	GG	GG	GG	GG	GG	GG	GG	GG	GG	GG	GG	GG	GG	GG	GG	GG	GG	GG	GG	GG	GG	GG	GG	GG	GG	GG	GG	GG	GG	GG	GG	GG	GG	GG	GG	GG	GG	GG	GG	GG	GG	GG	GG
Gm03_45217524_G_T	Gm03	43213208	TT	TT	TT	TT	TT	TT	TT	TT	TT	TT	TT	TT	TT	TT	TT	TT	TT	TT	TT	TT	TT	TT	TT	TT	TT	TT	TT	TT	TT	TT	TT	TT	TT	TT	TT	TT	TT	TT	TT	TT	TT	TT	TT	TT	TT	TT	TT
Gm03_45416367_C_T	Gm03	43412025	CC	CC	CC	CC	CC	CC	CC	CC	CC	CC	CC	CC	CC	CC	CC	CC	CC	CC	CC	CC	CC	CC	CC	CC	CC	CC	CC	CC	CC	CC	CC	CC	CC	CC	CC	CC	CC	CC	CC	CC	CC	CC	CC	CC	CC	CC	CC
Gm03_45488992_G_A	Gm03	43484650	GG	GG	GG	GG	GG	GG	GG	GG	GG	GG	GG	GG	GG	GG	GG	GG	GG	GG	GG	GG	GG	GG	GG	GG	GG	GG	GG	GG	GG	GG	GG	GG	GG	GG	GG	GG	GG	GG	GG	GG	GG	GG	GG	GG	GG	GG	GG
Gm03_45614970_C_T	Gm03	43610628	CC	CC	CC	CC	CC	CC	CC	CC	CC	CC	CC	CC	CC	CC	CC	CC	CC	CC	CC	CC	CC	CC	CC	CC	CC	CC	CC	CC	CC	CC	CC	CC	CC	CC	CC	CC	CC	CC	CC	CC	CC	CC	CC	CC	CC	CC	CC
Gm03_45994991_T_C	Gm03	43991274	TT	TT	TT	TT	TT	TT	TT	TT	TT	TT	TT	TT	TT	TT	TT	TT	TT	TT	TT	TT	TT	TT	TT	TT	TT	TT	TT	TT	TT	TT	TT	TT	TT	TT	TT	TT	TT	TT	TT	TT	TT	TT	TT	TT	TT	TT	TT
Gm03_46209325_G_A	Gm03	44208679	AA	AA	AA	AA	AA	AA	AA	AA	AA	AA	AA	AA	AA	AA	AA	AA	AA	AA	AA	AA	AA	AA	AA	AA	AA	AA	AA	AA	AA	AA	AA	AA	AA	AA	AA	AA	AA	AA	AA	AA	AA	AA	AA	AG	AA	AA	AA
Gm03_46337339_T_C	Gm03	44336809	TT	CC	CC	TT	TC	TT	CC	TT	TT	TT	TT	TT	TC	TT	TT	TT	TT	TC	CC	TT	CC	TT	TT	CC	CC	CC	CC	CC	CC	CC	CC	CC	TT	TT	CC	TT	TT	CC	CC	CC	CC	TT	TT	TT	TT	TT	TT
Gm03_46380953_T_G	Gm03	44380423	TG	TT	--	GG	--	GG	TT	GG	GG	GG	GG	GG	--	GG	GG	GG	GG	--	TT	GG	TT	GG	GG	TT	TT	TT	TT	TT	TT	TT	TT	TT	GG	GG	TT	GG	GG	TG	TG	TT	TT	GG	GG	GG	GG	GG	GG
Gm03_46445958_G_T	Gm03	44445428	GG	GG	GG	TT	--	TT	GG	TT	TT	TT	TG	TG	--	TT	TT	TG	TT	--	GG	TT	GG	TT	TG	GG	GG	GG	GG	GG	GG	GG	GG	GG	TT	TT	GG	TT	TT	GG	GG	GG	GG	--	TT	TT	TT	TT	TT
Gm03_46508111_A_C	Gm03	44507530	AA	AA	AA	CC	--	CC	AA	CC	CC	CC	--	--	--	CC	CC	--	CC	--	AA	CC	AA	CC	--	AA	AA	AA	AA	AA	AA	AA	AA	AA	CC	CC	AA	CC	CC	AA	AA	AA	AA	--	CC	CC	CC	CC	CC
Gm03_46592189_A_G	Gm03	44591609	AA	AA	AA	GG	AG	GG	AA	GG	GG	GG	GG	GG	AG	GG	GG	GG	GG	AG	AA	GG	AA	GG	GG	AA	AA	AA	AA	AA	AA	AA	AA	AA	GG	GG	AA	GG	GG	AA	AA	AA	AA	GG	GG	GG	GG	GG	GG
Gm03_46889507_T_C	Gm03	44888926	TT	TT	TT	CC	--	--	TT	CC	CC	CC	--	TC	--	CC	CC	TC	CC	--	TT	CC	TT	CC	TC	TT	TT	TT	TT	TT	TT	TT	TT	TT	CC	CC	TT	CC	CC	--	TT	TT	TT	--	CC	CC	CC	CC	CC
Gm03_46998040_A_G	Gm03	44997458	AA	AA	AA	GG	GG	GG	AA	GG	GG	GG	GG	--	AG	GG	GG	GG	GG	AG	AA	GG	AA	GG	GG	AA	AA	AA	AA	AA	AA	AA	AA	AA	GG	GG	AA	GG	GG	AA	AA	AA	AA	GG	GG	GG	GG	GG	GG
Gm03_47106922_G_A	Gm03	45106340	GG	GG	GG	AA	AA	AA	GG	AA	AA	AA	AA	AG	AG	AA	AA	AA	AA	AG	GG	AA	GG	AA	AA	GG	GG	GG	GG	GG	GG	GG	GG	GG	AA	AA	GG	AA	AA	GG	GG	GG	GG	AA	AA	AA	AA	AA	AA
Gm03_47212539_T_C	Gm03	45211072	CC	CC	CC	TT	TT	TT	CC	TT	TT	TT	TT	--	TC	TT	TT	TT	TT	TC	CC	TT	CC	TT	TT	CC	CC	CC	CC	CC	CC	CC	CC	CC	TT	TT	CC	TT	TT	CC	CC	CC	CC	TT	TT	TT	TT	TT	TT
Gm03_47320906_C_T	Gm03	45319510	TT	TT	TT	CC	CC	CC	TT	CC	CC	CC	CC	CC	TC	CC	CC	CC	CC	TC	TT	CC	TC	CC	CC	TT	TT	TT	TT	TC	TT	TT	TT	TT	CC	CC	TT	CC	CC	TT	TT	TT	TT	CC	CC	CC	CC	CC	CC
Gm03_47386481_A_C	Gm03	45385087	AA	AA	AA	CC	CC	CC	AA	CC	CC	CC	CC	CC	AC	CC	CC	CC	CC	AC	AA	CC	AC	CC	CC	AA	AA	AA	AA	AC	AA	AA	AA	AA	CC	CC	AA	CC	CC	AA	AA	AA	AA	CC	CC	CC	CC	CC	CC
Gm03_47713742_T_C	Gm03	45712413	TC	CC	--	TT	TT	TT	CC	TT	TT	TT	TT	TT	TT	TT	TT	TT	TT	--	CC	TT	--	TT	TT	CC	CC	CC	CC	TC	CC	--	CC	CC	TT	TT	CC	TT	TT	TC	--	CC	CC	TT	TT	TT	TT	TT	TT
Gm04_10805_T_C	Gm04	56409	TC	CC	TT	CC	CC	TC	CC	TT	CC	TT	--	TT	TT	CC	CC	CC	CC	CC	CC	CC	CC	CC	--	CC	CC	TC	CC	TT	CC	TT	TT	TT	TT	CC	--	CC	CC	CC	TC	CC	CC	TT	CC	CC	CC	CC	TT
Gm04_516796_A_G	Gm04	555823	AA	AA	AA	AA	AA	AA	AA	AA	AA	AA	AA	AA	AA	AA	AA	AA	AA	AA	AA	AA	AA	AA	AA	AA	AA	AA	AA	AA	AA	AA	AA	AA	AA	AA	AA	AA	AA	AA	AA	AA	AA	AA	AA	AA	AA	AA	AA
Gm04_547510_C_T	Gm04	586537	TT	TT	TT	TT	TT	TT	TT	TT	TT	TT	TT	TT	TT	TT	TT	TT	TT	TT	TT	TT	TT	TT	TT	TT	TT	TT	TT	TT	TT	TT	TT	TT	TT	TT	TT	TT	TT	TT	TT	TT	TT	TT	TT	TT	TT	TT	TT
Gm04_717646_C_T	Gm04	756672	TT	TT	TT	TT	TT	TT	TT	TT	TT	TT	TT	TT	TT	TT	TT	TT	TT	TT	TT	TT	TT	TT	TT	TT	TT	TT	TT	TT	TT	TT	TT	TT	TT	TT	TT	TT	TT	TT	TT	TT	TT	TT	TT	TT	TT	TT	TT
Gm04_1126451_A_G	Gm04	1165478	AA	AA	AA	AA	AA	AA	AA	AA	AA	AA	AA	AA	AA	AA	AA	AA	AA	AA	AA	AA	AA	AA	AA	AA	AA	AA	AA	AA	AA	AA	AA	AA	AA	AA	AA	AA	AA	AA	AA	AA	AA	AA	AA	AA	AA	AA	AA
Gm04_1621110_C_A	Gm04	1669148	AA	AA	AA	AA	AA	AA	AA	AA	AA	AA	AA	AA	AA	AA	AA	AA	AA	AA	AA	AA	AA	AA	AA	AA	AA	AA	AA	AA	AA	AA	AA	AA	AA	AA	AA	AA	AA	AA	AA	AA	AA	AA	AA	AA	AA	AA	AA
Gm04_1726991_G_T	Gm04	1775055	TT	TT	GG	GG	GG	GG	GG	TT	TT	GG	GG	--	GG	GG	TT	GG	GG	GG	GG	GG	GG	GG	TT	GG	GG	GG	GG	TT	GG	TT	GG	TT	TT	TT	TG	GG	GG	GG	GG	GG	GG	GG	GG	TT	GG	GG	GG
Gm04_1778735_A_G	Gm04	1826798	GG	GG	AA	AA	AA	AG	AA	GG	GG	AA	AA	--	AA	AA	GG	AA	AA	--	AA	AA	AA	AA	--	AA	AA	AG	AA	GG	--	GG	AA	GG	GG	GG	AG	AA	AA	AA	AG	AA	AA	AA	AA	--	AA	AA	AA
Gm04_1930897_T_C	Gm04	1987967	TT	TT	TT	TT	TT	TT	TT	TT	TT	TT	TT	TT	TT	TT	TT	TT	TT	TT	TT	TT	TT	TT	TT	TT	TT	TT	TT	TT	TT	TT	TT	TT	TT	TT	TT	TT	TT	TT	TT	TT	TT	TT	TT	TT	TT	TT	TT
Gm04_2045637_T_C	Gm04	2102753	CC	CC	TT	TT	TT	--	TT	CC	CC	TT	TT	TC	TT	TT	CC	TT	TT	TT	TT	TT	TT	TT	--	TT	TT	TT	TT	CC	TT	CC	TT	CC	CC	CC	--	TT	TT	TT	--	TT	TT	TT	TT	TC	TT	TT	TT
Gm04_2129696_T_C	Gm04	2186828	TT	TT	TT	TT	TT	TT	TT	TT	TT	TT	TT	TT	TT	TT	TT	TT	TT	TT	TT	TT	TT	TT	TT	TT	TT	TT	TT	TT	TT	TT	TT	TT	TT	TT	TT	TT	TT	TT	TT	TT	TT	TT	TT	TT	TT	TT	TT
Gm04_2574201_T_G	Gm04	2631785	GG	GG	GG	GG	GG	GG	GG	GG	GG	GG	GG	GG	GG	GG	GG	GG	GG	GG	GG	GG	GG	GG	GG	GG	GG	GG	GG	GG	GG	GG	GG	GG	GG	GG	GG	GG	GG	GG	GG	GG	GG	GG	GG	GG	GG	GG	GG
Gm04_2632511_T_G	Gm04	2690045	GG	GG	GG	GG	GG	GG	GG	GG	GG	GG	GG	GG	GG	GG	GG	GG	GG	GG	GG	GG	GG	GG	GG	GG	GG	GG	GG	GG	GG	GG	GG	GG	GG	GG	GG	GG	GG	GG	GG	GG	GG	GG	GG	GG	GG	GG	GG
Gm04_2681971_T_C	Gm04	2739495	CC	CC	CC	CC	CC	CC	CC	CC	CC	CC	CC	CC	CC	CC	CC	CC	CC	CC	CC	CC	CC	CC	CC	CC	CC	CC	CC	CC	CC	CC	CC	CC	CC	CC	CC	CC	CC	CC	CC	CC	CC	CC	CC	CC	CC	CC	CC
Gm04_4841626_A_G	Gm04	4897711	AA	AA	AA	AA	AA	AA	AA	AA	AA	AA	AA	AA	AA	AA	AA	AA	AA	AA	AA	AA	AA	AA	AA	AA	AA	AA	AA	AA	AA	AA	AA	AA	AA	AA	AA	AA	AA	AA	AA	AA	AA	AA	AA	AA	AA	AA	AA
Gm04_4922361_T_C	Gm04	4978349	TT	TT	TT	TT	TT	TT	TT	TT	TT	TT	TT	TT	TT	TT	TT	TT	TT	TT	TT	TT	TT	TT	TT	TT	TT	TT	TT	TT	TT	TT	TT	TT	TT	TT	TT	TT	TT	TT	TT	TT	TT	TT	TT	TT	TT	TT	TT
Gm04_5034406_T_C	Gm04	5090747	TT	TT	TT	TT	TT	TT	TT	TT	TT	TT	TT	TT	TT	TT	TT	TT	TT	TT	TT	TT	TT	TT	TT	TT	TT	TT	TT	TT	TT	TT	TT	TT	TT	TT	TT	TT	TT	TT	TT	TT	TT	TT	TT	TT	TT	TT	TT
Gm04_5279327_C_T	Gm04	5344677	CC	CC	CC	CC	CC	CC	CC	CC	CC	CC	CC	CC	CC	CC	CC	CC	CC	CC	CC	CC	CC	CC	CC	CC	CC	CC	CC	CC	CC	CC	CC	CC	CC	CC	CC	CC	CC	CC	CC	CC	CC	CC	CC	CC	CC	CC	CC
Gm04_5750694_G_A	Gm04	5816885	GG	AA	GG	GG	GG	--	GG	AA	GG	GG	GG	AA	AA	GG	AA	GG	GG	GG	GG	AA	GG	AA	AG	AA	GG	GG	GG	GG	AG	GG	GG	AA	AA	AA	AA	GG	GG	GG	--	GG	GG	GG	GG	AG	GG	GG	GG
Gm04_8004029_C_A	Gm04	8075910	CC	AA	CC	CC	AA	AA	CC	AA	CC	CC	CC	CC	AA	CC	AA	CC	CC	CC	CC	AA	CC	AA	AA	AA	AC	AA	CC	CC	AA	AA	CC	AA	AA	AA	AA	AA	AA	CC	--	AA	CC	CC	CC	AC	CC	AA	CC
Gm04_8065917_C_T	Gm04	8137949	CC	TT	CC	CC	TT	TT	CC	TT	CC	CC	CC	CC	TT	CC	TT	CC	CC	CC	CC	TT	CC	TT	--	TT	TC	--	CC	CC	TT	TT	CC	TT	TT	TT	TT	TT	TT	CC	TC	TT	CC	CC	CC	--	CC	TT	CC
Gm04_8126739_A_G	Gm04	8198769	GG	AA	GG	GG	AA	AA	GG	AA	GG	GG	GG	AG	AA	GG	AA	GG	GG	GG	--	AA	GG	AA	AA	AA	AG	AA	GG	GG	AA	AA	GG	AA	AA	AA	AA	AA	AA	GG	AG	AA	GG	GG	GG	--	GG	AA	GG
Gm04_8317828_G_A	Gm04	8389851	GG	AA	GG	GG	AA	AA	GG	AA	GG	GG	GG	GG	AA	GG	AA	GG	GG	GG	GG	AA	GG	AA	--	AA	AG	--	GG	GG	AA	AA	GG	AA	AA	AA	AA	AA	AA	GG	AG	AA	GG	GG	GG	--	GG	AA	GG
Gm04_8457367_T_C	Gm04	8529395	TT	TT	TT	TT	TT	TT	TT	TT	TT	TT	TT	TT	TT	TT	TT	TT	TT	TT	TT	TT	TT	TT	TT	TT	TT	TT	TT	TT	TT	TT	TC	TT	TT	TT	TT	TT	TT	TT	TT	TT	TT	TT	TT	TT	TT	TT	TT
Gm04_8493767_T_C	Gm04	8565795	TT	TT	TT	TT	TT	TT	TT	TT	TT	TT	TT	TT	TT	TT	TT	TT	TT	TT	TT	TT	TT	TT	TT	TT	TT	TT	TT	TT	TT	TT	--	TT	TT	TT	TT	TT	TT	TT	TT	TT	TT	TT	TT	TT	TT	TT	TT
Gm04_8701289_A_G	Gm04	8778253	AA	AA	AA	AA	AA	AA	AA	AA	AA	AA	AA	AA	AA	AA	AA	AA	AA	AA	AA	AA	AA	AA	AA	AA	AA	AA	AA	AA	AA	AA	AG	AA	AA	AA	AA	AA	AA	AA	AA	AA	AA	AA	AA	AA	AA	AA	AA
Gm04_8760004_T_G	Gm04	8836969	TT	TT	TT	TT	TT	TT	TT	TT	TT	TT	TT	TT	TT	TT	TT	TT	TT	TT	TT	TT	TT	TT	TT	TT	TT	TT	TT	TT	TT	TT	--	TT	TT	TT	TT	TT	TT	TT	TT	TT	TT	TT	TT	TT	TT	TT	TT
Gm04_8845668_G_T	Gm04	8922321	GG	GG	GG	GG	GG	GG	GG	GG	GG	GG	GG	GG	GG	GG	GG	GG	GG	GG	GG	GG	GG	GG	GG	GG	GG	GG	GG	GG	GG	GG	--	GG	GG	GG	GG	GG	GG	GG	GG	GG	GG	GG	GG	GG	GG	GG	GG
Gm04_8937855_A_G	Gm04	9014045	AA	AA	AA	AA	AA	AA	AA	AA	AA	AA	AA	AA	AA	AA	AA	AA	AA	AA	AA	AA	AA	AA	AA	AA	AA	AA	AA	AA	AA	AA	--	AA	AA	AA	AA	AA	AA	AA	AA	AA	AA	AA	AA	AA	AA	AA	AA
Gm04_9002718_G_A	Gm04	9078599	GG	GG	GG	GG	GG	GG	GG	GG	GG	GG	GG	GG	GG	GG	GG	GG	GG	GG	GG	GG	GG	GG	GG	GG	GG	GG	GG	GG	GG	GG	GG	GG	GG	GG	GG	GG	GG	GG	GG	GG	GG	GG	GG	GG	GG	GG	GG
Gm04_9099671_A_G	Gm04	9175605	AA	AA	AA	AA	AA	AA	AA	AA	AA	AA	AA	AA	AA	AA	AA	AA	AA	AA	AA	AA	AA	AA	AA	AA	AA	AA	AA	AA	AA	AA	AA	AA	AA	AA	AA	AA	AA	AA	AA	AA	AA	AA	AA	AA	AA	AA	AA
Gm04_9242542_C_T	Gm04	9318510	CC	CC	CC	CC	CC	CC	CC	CC	CC	CC	CC	CC	CC	CC	CC	CC	CC	CC	CC	CC	CC	CC	CC	CC	CC	CC	CC	CC	CC	CC	CC	CC	CC	CC	CC	CC	CC	CC	CC	CC	CC	CC	CC	CC	CC	CC	CC
Gm04_9334751_T_C	Gm04	9410719	TT	TT	TT	TT	TT	TT	TT	TT	TT	TT	TT	TT	TT	TT	TT	TT	TT	TT	TT	TT	TT	TT	TT	TT	TT	TT	TT	TT	TT	TT	TT	TT	TT	TT	TT	TT	TT	TT	TT	TT	TT	TT	TT	TT	TT	TT	TT
Gm04_9464579_T_C	Gm04	9532122	TT	TT	TT	TT	TT	TT	TT	TT	TT	TT	TT	TT	TT	TT	TT	TT	TT	TT	TT	TT	TT	TT	TC	TT	TT	TT	TT	TT	TT	TT	TC	TT	TT	TT	TT	TT	TT	TT	TT	TT	TT	TT	TT	TT	TT	TT	TT
Gm04_9511650_A_G	Gm04	9580008	AA	AA	AA	AA	AA	AA	AA	AA	AA	AA	AA	AA	AA	AA	AA	AA	AA	AA	AA	AA	AA	AA	AA	AA	AA	AA	AA	AA	AA	AA	AA	AA	AA	AA	AA	AA	AA	AA	AA	AA	AA	AA	AA	AA	AA	AA	AA
Gm04_9553531_A_G	Gm04	9621570	GG	GG	GG	GG	GG	GG	GG	GG	GG	GG	GG	GG	GG	GG	GG	GG	GG	GG	GG	GG	GG	GG	GG	GG	GG	GG	GG	GG	GG	GG	GG	GG	GG	GG	GG	GG	GG	GG	GG	GG	GG	GG	GG	GG	GG	GG	GG
Gm04_9600878_C_A	Gm04	9674684	AA	AA	AA	AA	AA	AA	AA	AA	AA	AA	AA	AA	AA	AA	AA	AA	AA	AA	AA	AA	AA	AA	--	AA	AA	AA	AA	AA	AA	AA	AC	AA	AA	AA	AA	AA	AA	AA	AA	AA	AA	AA	AA	AA	AA	AA	AA
Gm04_9824083_A_G	Gm04	9897430	GG	GG	GG	GG	GG	GG	GG	GG	GG	GG	GG	GG	GG	GG	GG	GG	GG	GG	GG	GG	GG	GG	GG	GG	GG	GG	GG	GG	GG	GG	GG	GG	GG	GG	GG	GG	GG	GG	GG	GG	GG	GG	GG	GG	GG	GG	GG
Gm04_10117285_G_A	Gm04	10193474	AA	AA	AA	AA	AA	AA	AA	AA	AA	AA	AA	AA	AA	AA	AA	AA	AA	AA	AA	AA	AA	AA	AA	AA	AA	AA	AA	AA	AA	AA	AA	AA	AA	AA	AA	AA	AA	AA	AA	AA	AA	AA	AA	AA	AA	AA	AA
Gm04_10868076_G_A	Gm04	11049269	AA	AA	AA	AA	AA	AA	AA	AA	AA	AA	AA	AA	AA	AA	AA	AA	AA	AA	AA	AA	AA	AA	AG	AA	AA	AA	AA	AA	AA	AA	AG	AA	AA	AA	AA	AA	AA	AA	AA	AA	AA	AA	AA	AA	AA	AA	AA
Gm04_11138059_A_G	Gm04	12208154	AA	AA	AA	AA	AA	AA	AA	AA	AA	AA	AA	AA	AA	AA	AA	AA	AA	AA	AA	AA	AA	AA	AG	AA	AA	AA	AA	AA	AA	AA	AG	AA	AA	AA	AA	AA	AA	AA	AA	AA	AA	AA	AA	AA	AA	AA	AA
Gm04_11433919_T_C	Gm04	12473858	CC	CC	CC	CC	CC	CC	CC	CC	CC	CC	CC	CC	CC	CC	CC	CC	CC	CC	CC	CC	CC	CC	CC	CC	CC	CC	CC	CC	CC	CC	CC	CC	CC	CC	CC	CC	CC	CC	CC	CC	CC	CC	CC	CC	CC	CC	CC
Gm04_11936288_G_T	Gm04	12962840	--	TT	TT	TT	TT	TT	TT	TT	TT	TT	TT	TT	TT	TT	TT	TT	TT	TT	TT	TT	TT	TT	TG	TT	TT	TT	TT	TT	TT	TT	TG	TT	TT	TT	TT	TT	TT	TT	TT	TT	TT	TT	TT	TT	TT	TT	TT
Gm04_12216645_G_A	Gm04	13255534	AA	AA	AA	AA	AA	AA	AA	AA	AA	AA	AA	AA	AA	AA	AA	AA	AA	AA	AA	AA	AA	AA	AA	AA	AA	AA	AA	AA	AA	AA	AG	AA	AA	AA	AA	AA	AA	AA	AA	AA	AA	AA	AA	AA	AA	AA	AA
Gm04_12283176_T_C	Gm04	13322074	CC	CC	CC	CC	CC	CC	CC	CC	CC	CC	CC	CC	CC	CC	CC	CC	CC	CC	CC	CC	CC	CC	CC	CC	CC	CC	CC	CC	CC	CC	CC	CC	CC	CC	CC	CC	CC	CC	CC	CC	CC	CC	CC	CC	CC	CC	CC
Gm04_12410533_A_G	Gm04	13499694	AA	AA	AA	AA	AA	AA	AA	AA	AA	AA	AA	AA	AA	AA	AA	AA	AA	AA	AA	AA	AA	AA	AA	AA	AA	AA	AA	AA	AA	AA	AA	AA	AA	AA	AA	AA	AA	AA	AA	AA	AA	AA	AA	AA	AA	AA	AA
Gm04_13022455_C_T	Gm04	14033880	TT	TT	TT	TT	TT	TT	TT	TT	TT	TT	TT	TT	TT	TT	TT	TT	TT	TT	TT	TT	TT	TT	TT	TT	TT	TT	TT	TT	TT	TT	TT	TT	TT	TT	TT	TT	TT	TT	TT	TT	TT	TT	TT	TT	TT	TT	TT
Gm04_13284121_T_C	Gm04	14305426	CC	CC	CC	CC	CC	CC	CC	CC	CC	CC	CC	CC	CC	CC	CC	CC	CC	CC	CC	CC	CC	CC	CC	CC	CC	CC	CC	CC	CC	CC	CC	CC	CC	CC	CC	CC	CC	CC	CC	CC	CC	CC	CC	CC	CC	CC	CC
Gm04_13509340_T_C	Gm04	14530571	CC	CC	CC	CC	CC	CC	CC	CC	CC	CC	CC	CC	CC	CC	CC	CC	CC	CC	CC	CC	CC	CC	CC	CC	CC	CC	CC	CC	CC	CC	CC	CC	CC	CC	CC	CC	CC	CC	CC	CC	CC	CC	CC	CC	CC	CC	CC
Gm04_14549891_C_T	Gm04	15577538	TT	TT	TT	TT	TT	TT	TT	TT	TT	TT	TT	TT	TT	TT	TT	TT	TT	TT	TT	TT	TT	TT	TT	TT	TT	TT	TT	TT	TT	TT	TT	TT	TT	TT	TT	TT	TT	TT	TT	TT	TT	TT	TT	TT	TT	TT	TT
Gm04_14641479_A_C	Gm04	15669140	CC	CC	CC	CC	CC	CC	CC	CC	CC	CC	CC	CC	CC	CC	CC	CC	CC	CC	CC	CC	CC	CC	CC	CC	CC	CC	CC	CC	CC	CC	CC	CC	CC	CC	CC	CC	CC	CC	CC	CC	CC	CC	CC	CC	CC	CC	CC
Gm04_15048603_A_G	Gm04	16084577	GG	GG	GG	GG	GG	GG	GG	GG	GG	GG	GG	GG	GG	GG	GG	GG	GG	GG	GG	GG	GG	GG	GG	GG	GG	GG	GG	GG	GG	GG	GG	GG	GG	GG	GG	GG	GG	GG	GG	GG	GG	GG	GG	GG	GG	GG	GG
Gm04_16244996_G_A	Gm04	17289574	AA	AA	AA	AA	AA	AA	AA	AA	AA	AA	AA	AA	AA	AA	AA	AA	AA	AA	AA	AA	AA	AA	AA	AA	AA	AA	AA	AA	AA	AA	AA	AA	AA	AA	AA	AA	AA	AA	AA	AA	AA	AA	AA	AA	AA	AA	AA
Gm04_16338974_A_G	Gm04	17387738	GG	GG	GG	GG	GG	GG	GG	GG	GG	GG	GG	GG	GG	GG	GG	GG	GG	GG	GG	GG	GG	GG	GG	GG	GG	GG	GG	GG	GG	GG	GG	GG	GG	GG	GG	GG	GG	GG	GG	GG	GG	GG	GG	GG	GG	GG	GG
Gm04_16999532_T_C	Gm04	18023776	CC	CC	CC	CC	CC	CC	CC	CC	CC	CC	CC	CC	CC	CC	CC	CC	CC	CC	CC	CC	CC	CC	CC	CC	CC	CC	CC	CC	CC	CC	CC	CC	CC	CC	CC	CC	CC	CC	CC	CC	CC	CC	CC	CC	CC	CC	CC
Gm04_17773168_A_G	Gm04	18924038	GG	GG	GG	GG	GG	GG	GG	GG	GG	GG	GG	GG	GG	GG	GG	GG	GG	GG	GG	GG	GG	GG	GG	GG	GG	GG	GG	GG	GG	GG	GG	GG	GG	GG	GG	GG	GG	GG	GG	GG	GG	GG	GG	GG	GG	GG	GG
Gm04_18000454_A_C	Gm04	19151390	CC	CC	CC	CC	CC	CC	CC	CC	CC	CC	CC	CC	CC	CC	CC	CC	CC	CC	CC	CC	CC	CC	CC	CC	CC	CC	CC	CC	CC	CC	CC	CC	CC	CC	CC	CC	CC	CC	CC	CC	CC	CC	CC	CC	CC	CC	CC
Gm04_19107515_A_G	Gm04	20263553	GG	GG	GG	GG	GG	GG	GG	GG	GG	GG	GG	GG	GG	GG	GG	GG	GG	GG	GG	GG	GG	GG	GG	GG	GG	GG	GG	GG	GG	GG	GG	GG	GG	GG	GG	GG	GG	GG	GG	GG	GG	GG	GG	GG	GG	GG	GG
Gm04_32800373_C_T	Gm04	21676235	TT	TT	TT	TT	TT	TT	TT	TT	TT	TT	TT	TT	TT	TT	TT	TT	TT	TT	TT	TT	TT	TT	TT	TT	TT	TT	TT	TT	TT	TT	TT	TT	TT	TT	TT	TT	TT	TT	TT	TT	TT	TT	TT	TT	TT	TT	TT
Gm04_31436577_C_A	Gm04	23026281	AA	AA	AA	AA	AA	AA	AA	AA	AA	AA	AA	AA	AA	AA	AA	AA	AA	AA	AA	AA	AA	AA	AA	AA	AA	AA	AA	AA	AA	AA	AA	AA	AA	AA	AA	AA	AA	AA	AA	AA	AA	AA	AA	AA	AA	AA	AA
Gm04_30457043_A_G	Gm04	24031396	GG	GG	GG	GG	GG	GG	GG	GG	GG	GG	GG	GG	GG	GG	GG	GG	GG	GG	GG	GG	GG	GG	GG	GG	GG	GG	GG	GG	GG	GG	GG	GG	GG	GG	GG	GG	GG	GG	GG	GG	GG	GG	GG	GG	GG	GG	GG
Gm12_18062812_A_G	Gm04	24971674	GG	GG	GG	GG	GG	GG	GG	GG	GG	GG	GG	GG	GG	GG	GG	GG	GG	GG	GG	GG	GG	GG	GG	GG	GG	GG	GG	GG	GG	GG	GG	GG	GG	GG	GG	GG	GG	GG	GG	GG	GG	GG	GG	GG	GG	GG	GG
Gm18_24826260_A_G	Gm04	25294058	GG	GG	GG	GG	GG	GG	GG	GG	GG	GG	GG	GG	GG	GG	GG	GG	GG	GG	GG	GG	GG	GG	GG	GG	GG	GG	GG	GG	GG	GG	GG	GG	GG	GG	GG	GG	GG	GG	GG	GG	GG	GG	GG	GG	GG	GG	GG
Gm18_25169738_G_A	Gm04	25618510	AA	AA	AA	AA	AA	AA	AA	AA	AA	AA	AA	AA	AA	AA	AA	AA	AA	AA	AA	AA	AA	AA	AA	AA	AA	AA	AA	AA	AA	AA	AA	AA	AA	AA	AA	AA	AA	AA	AA	AA	AA	AA	AA	AA	AA	AA	AA
Gm18_26396917_A_G	Gm04	26787764	GG	GG	GG	GG	GG	GG	GG	GG	GG	GG	GG	GG	GG	GG	GG	GG	GG	GG	GG	GG	GG	GG	GG	GG	GG	GG	GG	GG	GG	GG	GG	GG	GG	GG	GG	GG	GG	GG	GG	GG	GG	GG	GG	GG	GG	GG	GG
Gm18_27207283_T_C	Gm04	27597029	CC	CC	CC	CC	CC	CC	CC	CC	CC	CC	CC	CC	CC	CC	CC	CC	CC	CC	CC	CC	CC	CC	CC	CC	CC	CC	CC	CC	CC	CC	CC	CC	CC	CC	CC	CC	CC	CC	CC	CC	CC	CC	CC	CC	CC	CC	CC
Gm04_20921247_T_C	Gm04	30123651	CC	CC	CC	CC	CC	CC	CC	CC	CC	CC	CC	CC	CC	CC	CC	CC	CC	CC	CC	CC	CC	CC	CC	CC	CC	CC	CC	CC	CC	CC	CC	CC	CC	CC	CC	CC	CC	CC	CC	CC	CC	CC	CC	CC	CC	CC	CC
Gm04_20796034_A_G	Gm04	30248413	GG	GG	GG	GG	GG	GG	GG	GG	GG	GG	GG	GG	GG	GG	GG	GG	GG	GG	GG	GG	GG	GG	GG	GG	GG	GG	GG	GG	GG	GG	GG	GG	GG	GG	GG	GG	GG	GG	GG	GG	GG	GG	GG	GG	GG	GG	GG
Gm04_20729591_G_A	Gm04	30314753	AA	AA	AA	AA	AA	AA	AA	AA	AA	AA	AA	AA	AA	AA	AA	AA	AA	AA	AA	AA	AA	AA	AA	AA	AA	AA	AA	AA	AA	AA	AA	AA	AA	AA	AA	AA	AA	AA	AA	AA	AA	AA	AA	AA	AA	AA	AA
Gm04_24086337_A_G	Gm04	32591216	GG	GG	GG	GG	GG	GG	GG	GG	GG	GG	GG	GG	GG	GG	GG	GG	GG	GG	GG	GG	GG	GG	GG	GG	GG	GG	GG	GG	GG	GG	GG	GG	GG	GG	GG	GG	GG	GG	GG	GG	GG	GG	GG	GG	GG	GG	GG
Gm04_24276060_G_T	Gm04	32782075	TT	TT	TT	TT	TT	TT	TT	TT	TT	TT	TT	TT	TT	TT	TT	TT	TT	TT	TT	TT	TT	TT	TT	TT	TT	TT	TT	TT	TT	TT	TT	TT	TT	TT	TT	TT	TT	TT	TT	TT	TT	TT	TT	TT	TT	TT	TT
Gm04_25230364_T_C	Gm04	33719401	CC	CC	CC	CC	CC	CC	CC	CC	CC	CC	CC	CC	CC	CC	CC	CC	CC	CC	CC	CC	CC	CC	CC	CC	CC	CC	CC	CC	CC	CC	CC	CC	CC	CC	CC	CC	CC	CC	CC	CC	CC	CC	CC	CC	CC	CC	CC
Gm04_27207244_A_G	Gm04	35677222	GG	GG	GG	GG	GG	GG	GG	GG	GG	GG	GG	GG	GG	GG	GG	GG	GG	GG	GG	GG	GG	GG	GG	GG	GG	GG	GG	GG	GG	GG	GG	GG	GG	GG	GG	GG	GG	GG	GG	GG	GG	GG	GG	GG	GG	GG	GG
Gm04_28018833_G_A	Gm04	36480919	AA	AA	AA	AA	AA	AA	AA	AA	AA	AA	AA	AA	AA	AA	AA	AA	AA	AA	AA	AA	AA	AA	AA	AA	AA	AA	AA	AA	AA	AA	AA	AA	AA	AA	AA	AA	AA	AA	AA	AA	AA	AA	AA	AA	AA	AA	AA
Gm04_28121297_A_G	Gm04	36583386	GG	GG	GG	GG	GG	GG	GG	GG	GG	GG	GG	GG	GG	GG	GG	GG	GG	GG	GG	GG	GG	GG	GG	GG	GG	GG	GG	GG	GG	GG	GG	GG	GG	GG	GG	GG	GG	GG	GG	GG	GG	GG	GG	GG	GG	GG	GG
Gm04_37126858_A_G	Gm04	40276263	GG	GG	GG	GG	GG	GG	GG	GG	GG	GG	GG	GG	GG	GG	GG	GG	GG	GG	GG	GG	GG	GG	GG	GG	GG	GG	GG	GG	GG	GG	GG	GG	GG	GG	GG	GG	GG	GG	GG	GG	GG	GG	GG	GG	GG	GG	GG
Gm04_38135736_T_G	Gm04	41298992	GG	GG	GG	GG	GG	GG	GG	GG	GG	GG	GG	GG	GG	GG	GG	GG	GG	GG	GG	GG	GG	GG	GG	GG	GG	GG	GG	GG	GG	GG	GG	GG	GG	GG	GG	GG	GG	GG	GG	GG	GG	GG	GG	GG	GG	GG	GG
Gm04_38840391_A_G	Gm04	42002144	GG	GG	GG	GG	GG	GG	GG	GG	GG	GG	GG	GG	GG	GG	GG	GG	GG	GG	GG	GG	GG	GG	GG	GG	GG	GG	GG	GG	GG	GG	GG	GG	GG	GG	GG	GG	GG	GG	GG	GG	GG	GG	GG	GG	GG	GG	GG
Gm04_39087487_T_C	Gm04	42249241	CC	CC	CC	CC	CC	CC	CC	CC	CC	CC	CC	CC	CC	CC	CC	CC	CC	CC	CC	CC	CC	CC	CC	CC	CC	CC	CC	CC	CC	CC	CC	CC	CC	CC	CC	CC	CC	CC	CC	CC	CC	CC	CC	CC	CC	CC	CC
Gm04_39753174_T_C	Gm04	42905456	CC	CC	CC	CC	CC	CC	CC	CC	CC	CC	CC	CC	CC	CC	CC	CC	CC	CC	CC	CC	CC	CC	CC	CC	CC	CC	CC	CC	CC	CC	CC	CC	CC	CC	CC	CC	CC	CC	CC	CC	CC	CC	CC	CC	CC	CC	CC
Gm04_40345917_C_T	Gm04	43501937	TT	TT	TT	TT	TT	TT	TT	TT	TT	TT	TT	TT	TT	TT	TT	TT	TT	TT	TT	TT	TT	TT	TT	TT	TT	TT	TT	TT	TT	TT	TT	TT	TT	TT	TT	TT	TT	TT	TT	TT	TT	TT	TT	TT	TT	TT	TT
Gm04_40398866_C_T	Gm04	43554888	TT	TT	TT	TT	TT	TT	TT	TT	TT	TT	TT	TT	TT	TT	TT	TT	TT	TT	TT	TT	TT	TT	TT	TT	TT	TT	TT	TT	TT	TT	TT	TT	TT	TT	TT	TT	TT	TT	TT	TT	TT	TT	TT	TT	TT	TT	TT
Gm04_40811025_C_A	Gm04	43971465	CC	AA	AA	CC	CC	AA	CC	AA	CC	CC	CC	CC	AA	CC	AA	CC	CC	CC	CC	AA	CC	AA	CC	AA	CC	AA	CC	CC	AA	AA	CC	AA	AA	CC	AA	AA	AA	CC	--	AA	CC	CC	CC	AA	CC	AA	CC
Gm04_41071612_A_G	Gm04	44218913	AA	GG	GG	AA	AA	GG	AA	GG	AA	AA	AA	AA	GG	AA	GG	AA	AA	AA	AA	GG	AA	GG	AA	GG	AG	GG	AA	AA	GG	GG	AA	GG	GG	AA	GG	GG	GG	AA	AA	GG	AA	AA	AA	--	AA	GG	AA
Gm04_41328216_A_G	Gm04	44475489	AA	AA	AA	AA	AA	AA	AA	AA	AA	AA	AA	AA	AA	AA	AA	AA	AA	AA	AA	AA	AA	AA	AA	AA	AA	AA	AA	AA	AA	AA	AA	AA	AA	AA	AA	AA	AA	AA	AA	AA	AA	AA	AA	AA	AA	AA	AA
Gm04_41537794_G_A	Gm04	44684894	GG	GG	GG	GG	GG	GG	GG	GG	GG	GG	GG	GG	GG	GG	GG	GG	GG	GG	GG	GG	GG	GG	GG	GG	GG	GG	GG	GG	GG	GG	GG	GG	GG	GG	GG	GG	GG	GG	GG	GG	GG	GG	GG	GG	GG	GG	GG
Gm04_42153936_T_C	Gm04	45298627	CC	CC	CC	CC	CC	CC	CC	CC	CC	CC	CC	CC	CC	CC	CC	CC	CC	CC	CC	CC	CC	CC	CC	CC	CC	CC	CC	CC	CC	CC	CC	CC	CC	CC	CC	CC	CC	CC	CC	CC	CC	CC	CC	CC	CC	CC	CC
Gm04_42290567_T_C	Gm04	45435298	CC	CC	CC	CC	CC	CC	CC	CC	CC	CC	CC	CC	CC	CC	CC	CC	CC	CC	CC	CC	CC	CC	CC	CC	CC	CC	CC	CC	CC	CC	CC	CC	CC	CC	CC	CC	CC	CC	CC	CC	CC	CC	CC	CC	CC	CC	CC
Gm04_42638631_T_C	Gm04	45783367	CC	CC	CC	CC	CC	CC	CC	CC	CC	CC	CC	CC	CC	CC	CC	CC	CC	CC	CC	CC	CC	CC	CC	CC	CC	CC	CC	CC	CC	CC	CC	CC	CC	CC	CC	CC	CC	CC	CC	CC	CC	CC	CC	CC	CC	CC	CC
Gm04_42754380_A_C	Gm04	45899232	CC	CC	CC	CC	CC	CC	CC	CC	CC	CC	CC	CC	CC	CC	CC	CC	CC	CC	CC	CC	CC	CC	CC	CC	CC	CC	CC	CC	CC	CC	CC	CC	CC	CC	CC	CC	CC	CC	CC	CC	CC	CC	CC	CC	CC	CC	CC
Gm04_42832910_C_T	Gm04	45977762	TT	TT	TT	TT	TT	TT	TT	TT	TT	TT	TT	TT	TT	TT	TT	TT	TT	TT	TT	TT	TT	TT	TT	TT	TT	TT	TT	TT	TT	TT	TT	TT	TT	TT	TT	TT	TT	TT	TT	TT	TT	TT	TT	TT	TT	TT	TT
Gm04_43002324_T_G	Gm04	46147176	TT	TT	TT	TT	TT	TT	TT	TT	TT	TT	TT	TT	TT	TT	TT	TT	TT	TT	TT	TT	TT	TT	TT	TT	TT	TT	TT	TT	TT	TT	TT	TT	TT	TT	TT	TT	TT	TT	TT	TT	TT	TT	TT	TT	TT	TT	TT
Gm04_43058492_T_G	Gm04	46203344	TT	TT	TT	TT	TT	TT	TT	TT	TT	TT	TT	TT	TT	TT	TT	TT	TT	TT	TT	TT	TT	TT	TT	TT	TT	TT	TT	TT	TT	TT	TT	TT	TT	TT	TT	TT	TT	TT	TT	TT	TT	TT	TT	TT	TT	TT	TT
Gm04_43059665_A_C	Gm04	46204517	AA	AA	AA	AA	AA	AA	AA	AA	AA	AA	AA	AA	AA	AA	AA	AA	AA	AA	AA	AA	AA	AA	AA	AA	AA	AA	AA	AA	AA	AA	AA	AA	AA	AA	AA	AA	AA	AA	AA	AA	AA	AA	AA	AA	AA	AA	AA
Gm04_43390997_A_C	Gm04	46536196	AA	AA	AA	AA	AA	AA	AA	AA	AA	AA	AA	AA	AA	AA	AA	AA	AA	AA	AA	AA	AA	AA	AC	AA	AA	AA	AA	AA	AA	AA	AA	AA	AA	AA	AA	AA	AA	AA	AA	AA	AA	AA	AA	AA	AA	AA	AA
Gm04_43645980_A_C	Gm04	46793849	AA	AA	AA	AA	AA	AA	AA	AA	AA	AA	AA	AA	AA	AA	AA	AA	AA	AA	AA	AA	AA	AA	--	AA	AA	AA	AA	AA	AA	AA	AA	AA	AA	AA	AA	AA	AA	AA	AA	AA	AA	AA	AA	AA	AA	AA	AA
Gm04_43800862_C_T	Gm04	46948720	TT	CC	CC	TT	TT	CC	TC	CC	TT	TT	CC	TT	CC	CC	CC	TC	TT	CC	TT	CC	TT	CC	TT	CC	CC	TT	TT	TT	CC	TT	TT	CC	TC	TT	CC	CC	CC	TT	CC	CC	TT	CC	CC	CC	CC	CC	TT
Gm04_43885291_A_G	Gm04	47033150	GG	AA	AA	GG	GG	AA	AA	AA	GG	GG	AA	GG	AA	AA	AA	AG	GG	AA	GG	AA	GG	AA	--	AA	AA	GG	GG	GG	--	GG	AG	AA	--	GG	AA	AA	AA	GG	AA	AA	GG	AA	AA	AA	AA	AA	GG
Gm04_43966863_G_A	Gm04	47114807	AA	GG	GG	AA	AA	GG	GG	GG	AA	AA	GG	--	GG	GG	GG	AG	AA	GG	AA	GG	AA	GG	AA	GG	GG	AA	AA	AA	--	AA	AG	GG	--	AA	GG	GG	GG	AA	GG	GG	AA	GG	GG	GG	GG	GG	AA
Gm04_44114492_T_C	Gm04	47241037	CC	TT	TT	CC	CC	TT	TT	TT	CC	CC	TT	CC	TT	TT	TT	TT	CC	TT	CC	TT	CC	--	CC	TT	TT	CC	CC	CC	--	CC	TC	TT	--	CC	TT	TT	TT	CC	--	TT	CC	TT	TT	TT	TT	TT	CC
Gm04_44170480_C_A	Gm04	47296603	AA	CC	CC	AA	AA	CC	CC	CC	AA	AA	CC	--	CC	CC	CC	CC	AA	CC	AA	CC	AA	CC	AC	CC	CC	AA	AA	AA	--	AA	--	CC	AC	AA	CC	CC	CC	AA	--	CC	AA	CC	CC	CC	CC	CC	AA
Gm04_44220515_C_T	Gm04	47346638	--	CC	CC	TT	TT	CC	CC	CC	TC	TT	CC	TC	CC	CC	CC	CC	TT	CC	TC	CC	TT	CC	TC	CC	CC	TT	TT	TT	--	TT	--	CC	TC	TT	CC	CC	CC	TT	--	CC	TT	CC	CC	CC	CC	CC	TT
Gm04_44290827_T_C	Gm04	47416922	CC	TT	TT	CC	CC	TT	TT	TT	CC	CC	TT	TC	TT	TT	TT	TT	CC	TT	CC	TT	CC	TT	--	TT	TT	CC	CC	CC	TT	CC	TC	TT	TC	CC	TT	TT	TT	CC	TT	TT	CC	TT	TT	TT	TT	TT	CC
Gm04_44383936_C_T	Gm04	47510218	TT	CC	CC	TT	TT	CC	CC	CC	TT	TT	CC	TT	CC	CC	CC	CC	TT	CC	TT	CC	TT	CC	TT	CC	CC	TT	TT	TT	CC	TT	TC	CC	TC	TT	CC	CC	CC	TT	CC	CC	TT	CC	CC	CC	CC	CC	TT
Gm04_45093386_G_A	Gm04	48222393	AA	AA	AA	AA	AA	AA	AA	AA	AA	AA	AA	AA	AA	AA	AA	AA	AA	AA	AA	AA	AA	AA	AG	AA	AA	AA	AA	AA	AA	AA	AA	AA	AA	AA	AA	AA	AA	AA	AA	AA	AA	AA	AA	AA	AA	AA	AA
Gm04_45146452_T_G	Gm04	48275459	GG	GG	GG	GG	TT	GG	--	GG	GG	GG	GG	GG	GG	TT	GG	GG	GG	TT	GG	GG	GG	GG	GG	GG	TT	GG	GG	GG	GG	GG	TT	GG	GG	GG	GG	GG	TT	GG	TT	TT	GG	TT	GG	GG	GG	TT	GG
Gm04_45221708_C_T	Gm04	48350713	TT	TT	TT	TT	CC	TT	--	TT	TT	TT	TT	TT	TT	CC	TT	TT	TT	CC	TT	TT	TT	TT	--	TT	CC	TT	TT	TT	TT	TT	CC	TT	TT	TT	TT	TT	CC	TT	CC	CC	TT	CC	TT	TT	TT	CC	TT
Gm04_45313496_C_T	Gm04	48442502	TT	TT	TT	TT	TT	TT	TT	TT	TT	TT	TT	TT	TT	TT	TT	TT	TT	TT	TT	TT	TT	TT	TT	TT	TT	TT	TT	TT	TT	TT	TT	TT	TT	TT	TT	TT	TT	TT	TT	TT	TT	TT	TT	TT	TT	TT	TT
Gm04_45440686_T_C	Gm04	48569692	TT	TT	TT	TT	TT	TT	--	TT	TT	TT	TT	TT	TT	CC	TT	TT	TT	CC	TT	TT	TT	TT	TT	TT	CC	TT	TT	TT	TT	TT	CC	TT	TT	TT	TT	TT	CC	TT	CC	CC	TT	CC	TT	TT	TT	CC	TT
Gm04_45514250_A_G	Gm04	48643257	AA	AA	AA	AA	AA	--	--	AA	--	AA	AA	AA	AA	GG	AA	--	AA	--	AA	AA	AA	AA	--	AA	GG	AA	AA	AA	--	AA	GG	AA	AA	AA	AA	AA	GG	AA	--	GG	AA	GG	AA	AA	AA	GG	AA
Gm04_45613405_T_C	Gm04	48742467	TT	TT	TT	TT	TT	TT	TC	TT	TT	TT	TT	TT	TT	CC	TT	--	TT	CC	TT	TT	TT	TT	TT	TT	CC	TT	TT	TT	--	TT	CC	TT	TT	TT	TT	TT	CC	TT	CC	CC	TT	CC	TT	TT	TT	CC	TT
Gm04_45773963_G_A	Gm04	48902672	AA	AA	AA	AA	AA	AA	AA	AA	AA	AA	AA	AA	AA	AA	AA	AA	AA	AA	AA	AA	AA	AA	AA	AA	AA	AA	AA	AA	AA	AA	AA	AA	AA	AA	AA	AA	AA	AA	AA	AA	AA	AA	AA	AA	AA	AA	AA
Gm04_45999196_C_A	Gm04	49127886	CC	AA	AA	CC	CC	AC	AC	AA	AA	CC	CC	--	AA	AA	CC	AA	AA	AA	CC	CC	CC	CC	--	CC	AA	CC	CC	CC	--	CC	AA	CC	AC	AA	CC	AA	AA	CC	AA	AA	CC	AA	CC	--	CC	AA	CC
Gm04_46086046_G_A	Gm04	49214232	AA	GG	GG	AA	AA	AG	AG	GG	GG	AA	AA	AG	GG	GG	AA	GG	GG	GG	AA	AA	AA	--	AG	AA	GG	AA	AA	AA	--	AA	GG	AA	AG	GG	AA	GG	GG	AA	--	GG	AA	GG	AA	--	AA	GG	AA
Gm04_46215544_T_C	Gm04	49343742	CC	TT	TT	CC	CC	CC	CC	TT	TT	CC	CC	CC	TT	TT	CC	TT	TT	TT	CC	CC	CC	CC	--	CC	TT	CC	CC	CC	TT	CC	TT	CC	--	TT	CC	TT	TT	CC	TT	TT	CC	TT	CC	--	CC	TT	CC
Gm04_46280438_G_A	Gm04	49408492	GG	AA	--	GG	GG	GG	GG	AA	AA	GG	GG	GG	AA	AA	GG	AA	AA	AA	GG	GG	GG	GG	GG	GG	AA	GG	GG	GG	AG	GG	AA	GG	AA	AA	GG	AA	AA	GG	--	AA	GG	AA	GG	AG	GG	AA	GG
Gm04_46333298_A_G	Gm04	49461352	GG	GG	GG	GG	GG	GG	GG	GG	GG	GG	GG	GG	GG	GG	GG	GG	GG	GG	GG	GG	GG	GG	GG	GG	GG	GG	GG	GG	GG	GG	GG	GG	GG	GG	GG	GG	GG	GG	GG	GG	GG	GG	GG	GG	GG	GG	GG
Gm04_46390533_T_C	Gm04	49518574	CC	CC	CC	CC	CC	CC	CC	CC	CC	CC	CC	CC	CC	CC	CC	CC	CC	CC	CC	CC	CC	CC	CC	CC	CC	CC	CC	CC	CC	CC	CC	CC	CC	CC	CC	CC	CC	CC	CC	CC	CC	CC	CC	CC	CC	CC	CC
Gm04_46428018_A_C	Gm04	49556059	CC	CC	CC	CC	CC	CC	CC	CC	CC	CC	CC	CC	CC	CC	CC	CC	CC	CC	CC	CC	CC	CC	CC	CC	CC	CC	CC	CC	CC	CC	CC	CC	CC	CC	CC	CC	CC	CC	CC	CC	CC	CC	CC	CC	CC	CC	CC
Gm04_46469835_C_A	Gm04	49597877	CC	AA	AA	CC	CC	--	CC	AA	AA	CC	CC	CC	AA	AA	CC	AA	AA	AA	CC	CC	CC	CC	AC	CC	AA	CC	CC	CC	AA	CC	AA	CC	AA	AA	CC	AA	AA	CC	AA	AA	CC	AA	CC	--	CC	AA	CC
Gm04_46517129_C_T	Gm04	49645171	TT	TT	TT	TT	TT	TT	TT	TT	TT	TT	TT	TT	TT	TT	TT	TT	TT	TT	TT	TT	TT	TT	TT	TT	TT	TT	TT	TT	TT	TT	TT	TT	TT	TT	TT	TT	TT	TT	TT	TT	TT	TT	TT	TT	TT	TT	TT
Gm04_46550218_A_G	Gm04	49678259	GG	GG	GG	GG	GG	GG	GG	GG	GG	GG	GG	GG	GG	GG	GG	GG	GG	GG	GG	GG	GG	GG	GG	GG	GG	GG	GG	GG	GG	GG	GG	GG	GG	GG	GG	GG	GG	GG	GG	GG	GG	GG	GG	GG	GG	GG	GG
Gm04_46774083_G_A	Gm04	49902255	AA	GG	GG	GG	AA	--	AA	AA	GG	AA	AA	AA	GG	GG	AA	GG	GG	GG	AA	AA	AA	AA	AG	AA	GG	AA	AA	AA	--	AA	GG	AA	GG	GG	AA	GG	GG	--	GG	GG	AA	GG	AA	--	AA	GG	AA
Gm04_46835852_A_C	Gm04	49963417	CC	AA	AA	AA	AC	AC	CC	CC	AA	AC	AC	CC	AA	AA	CC	AA	AA	AA	CC	CC	--	AC	--	CC	AA	CC	CC	CC	AA	CC	AA	CC	AA	AA	CC	AA	AA	AC	AA	AA	AC	AA	CC	AA	CC	AA	CC
Gm04_46873023_T_G	Gm04	50000561	GG	GG	GG	GG	GG	GG	GG	GG	GG	GG	GG	GG	GG	GG	GG	GG	GG	GG	GG	GG	GG	GG	GG	GG	GG	GG	GG	GG	GG	GG	GG	GG	GG	GG	GG	GG	GG	GG	GG	GG	GG	GG	GG	GG	GG	GG	GG
Gm04_46932652_T_G	Gm04	50060206	GG	TT	--	TT	GG	TT	GG	GG	TT	GG	GG	GG	TT	TT	GG	TT	TT	TT	GG	GG	GG	GG	--	GG	TT	GG	GG	GG	TG	GG	TT	GG	TT	TT	GG	TT	TT	GG	TT	TT	GG	TT	GG	TG	GG	TT	GG
Gm04_46966383_G_A	Gm04	50093937	AA	GG	GG	GG	AA	GG	AA	AA	GG	AA	AA	AA	GG	GG	AA	GG	GG	GG	AA	AA	AA	AA	AG	AA	GG	AA	AA	AA	--	AA	GG	AA	GG	GG	AA	GG	GG	--	GG	GG	AA	GG	AA	AG	AA	GG	AA
Gm04_47092275_T_C	Gm04	50223267	TT	CC	CC	CC	TT	CC	TT	TT	CC	TT	TT	TT	CC	CC	TT	CC	CC	CC	TT	TT	TT	TT	TC	TT	CC	TT	TT	TT	--	TT	CC	TT	CC	CC	TT	CC	CC	--	CC	CC	TT	CC	TT	--	TT	CC	TT
Gm04_47313368_T_G	Gm04	50444359	GG	TT	TT	TT	GG	TT	GG	GG	TT	GG	GG	GG	TT	TT	GG	TT	TT	TT	GG	GG	GG	GG	--	GG	TT	GG	GG	GG	TT	GG	TT	GG	TT	TT	GG	TT	TT	GG	TT	TT	GG	TT	GG	TG	GG	TT	GG
Gm04_47540792_T_C	Gm04	50672102	CC	TT	TT	TT	CC	TT	CC	CC	TT	CC	CC	CC	TT	TT	CC	TT	TT	TT	CC	CC	CC	CC	CC	CC	TT	CC	CC	CC	--	CC	CC	CC	TT	TT	CC	TT	TT	TT	TT	TT	CC	TT	CC	TC	CC	TT	CC
Gm04_47718975_A_C	Gm04	50850285	CC	CC	CC	CC	CC	CC	CC	CC	CC	CC	CC	CC	CC	CC	CC	CC	CC	CC	CC	CC	CC	CC	CC	CC	CC	CC	CC	CC	CC	CC	CC	CC	CC	CC	CC	CC	CC	CC	CC	CC	CC	CC	CC	CC	CC	CC	CC
Gm04_47957714_A_C	Gm04	51089231	AA	CC	CC	CC	AA	CC	AA	AA	CC	AA	AA	AA	CC	CC	AA	CC	CC	CC	AA	AA	AA	AA	AC	AA	CC	AA	AA	AA	AC	AA	AA	AA	CC	CC	AA	CC	CC	CC	CC	CC	AA	CC	AA	--	AA	CC	AA
Gm04_47981836_T_C	Gm04	51113353	TT	CC	CC	CC	TT	CC	TT	TT	CC	TT	TT	--	CC	CC	TT	CC	CC	CC	TT	TT	TT	TT	TC	TT	--	TT	TT	TT	--	TT	TT	TT	CC	CC	TT	CC	CC	CC	CC	CC	TT	CC	TT	CC	TT	CC	TT
Gm04_48140577_G_A	Gm04	51272076	GG	AA	--	AA	GG	AA	GG	GG	AA	GG	GG	GG	AA	AA	GG	AA	AA	--	GG	GG	GG	GG	AG	GG	AA	GG	GG	GG	AG	GG	GG	GG	AA	AA	GG	AA	AA	AG	AA	AA	GG	AA	GG	--	GG	AA	GG
Gm04_48198636_G_A	Gm04	51330095	AA	AA	AA	AA	AA	AA	AA	AA	AA	AA	AA	AA	AA	AA	AA	AA	AA	AA	AA	AA	AA	AA	AA	AA	AA	AA	AA	AA	AA	AA	AA	AA	AA	AA	AA	AA	AA	AA	AA	AA	AA	AA	AA	AA	AA	AA	AA
Gm04_48244118_G_A	Gm04	51375575	GG	AA	--	AA	GG	AA	GG	GG	AA	GG	GG	GG	AA	AA	GG	AA	AA	AA	GG	GG	GG	GG	AG	GG	AA	GG	GG	GG	AG	GG	GG	GG	AA	AA	GG	AA	AA	AG	AA	AA	GG	AA	GG	--	GG	AA	GG
Gm04_48414788_T_C	Gm04	51546265	TT	CC	CC	CC	TT	CC	TT	TT	CC	TT	TT	TT	CC	CC	TT	CC	CC	CC	TT	TT	TT	TT	CC	TT	CC	TT	TT	TT	--	CC	TT	TT	CC	CC	TT	CC	CC	TC	CC	CC	TT	CC	TT	--	TT	CC	TT
Gm04_48812166_A_G	Gm04	51957955	AA	GG	GG	GG	AA	GG	AA	AA	GG	AA	AA	AA	GG	GG	AA	GG	AA	GG	AA	AA	AA	AA	GG	--	GG	AA	AA	AA	--	GG	AA	AA	GG	GG	AA	GG	GG	--	GG	GG	AA	GG	AA	--	AA	GG	AA
Gm05_9097414_G_A	Gm05	21750	AA	AA	AA	AA	AA	AA	AA	AA	AA	AA	AA	AA	AA	AA	AA	AA	AA	AA	AA	AA	AA	AA	AA	AA	AA	AA	AA	AA	AA	AA	AA	AA	AA	AA	AA	AA	AA	AA	AA	AA	AA	AA	AA	AA	AA	AA	AA
Gm05_9012813_A_G	Gm05	105085	GG	GG	GG	GG	GG	GG	GG	GG	GG	GG	GG	GG	GG	GG	GG	GG	GG	GG	GG	GG	GG	GG	GG	GG	GG	GG	GG	GG	GG	GG	GG	GG	GG	GG	GG	GG	GG	GG	GG	GG	GG	GG	GG	GG	GG	GG	GG
Gm05_8956994_C_T	Gm05	160904	TT	TT	TT	TT	TT	TT	TT	TT	TT	TT	TT	TT	TT	TT	TT	TT	TT	TT	TT	TT	TT	TT	TT	TT	TT	TT	TT	TT	TT	TT	TT	TT	TT	TT	TT	TT	TT	TT	TT	TT	TT	TT	TT	TT	TT	TT	TT
Gm05_8695812_A_G	Gm05	425159	GG	GG	GG	GG	GG	GG	GG	GG	GG	GG	GG	GG	GG	GG	GG	GG	GG	GG	GG	GG	GG	GG	GG	GG	GG	GG	GG	GG	GG	GG	GG	GG	GG	GG	GG	GG	GG	GG	GG	GG	GG	GG	GG	GG	GG	GG	GG
Gm05_8597246_C_T	Gm05	523725	TT	TT	TT	TT	TT	TT	TT	TT	TT	TT	TT	TT	TT	TT	TT	TT	TT	TT	TT	TT	TT	TT	TT	TT	TT	TT	TT	TT	TT	TT	TT	TT	TT	TT	TT	TT	TT	TT	TT	TT	TT	TT	TT	TT	TT	TT	TT
Gm05_8525159_C_T	Gm05	595812	TT	TT	TT	TT	TT	TT	TT	TT	TT	TT	TT	TT	TT	TT	TT	TT	TT	TT	TT	TT	TT	TT	TT	TT	TT	TT	TT	TT	TT	TT	TT	TT	TT	TT	TT	TT	TT	TT	TT	TT	TT	TT	TT	TT	TT	TT	TT
Gm05_8492435_A_G	Gm05	628524	GG	GG	GG	GG	GG	GG	GG	GG	GG	GG	GG	GG	GG	GG	GG	GG	GG	GG	GG	GG	GG	GG	GG	GG	GG	GG	GG	GG	GG	GG	GG	GG	GG	GG	GG	GG	GG	GG	GG	GG	GG	GG	GG	GG	GG	GG	GG
Gm05_682648_A_G	Gm05	2357871	GG	AA	AA	AA	AA	GG	AA	AA	GG	GG	GG	AA	AA	GG	AA	AA	AA	AA	AA	AA	AA	AA	AA	AG	AA	AA	GG	AA	GG	AA	GG	GG	GG	GG	AA	AA	GG	AA	AA	GG	AA	AA	AA	GG	AA	GG	GG
Gm05_765761_G_T	Gm05	2440984	TT	GG	GG	GG	GG	TT	GG	GG	TT	TT	TT	GG	GG	TT	GG	GG	GG	GG	GG	GG	GG	GG	GG	TG	GG	GG	TT	GG	TT	GG	TT	TT	TT	TT	GG	GG	TT	GG	GG	TT	GG	GG	GG	TT	GG	TT	TT
Gm05_888436_A_G	Gm05	2563867	AG	AA	AA	AA	AA	GG	AA	AA	GG	GG	--	AA	AA	GG	AA	AA	AA	AA	AA	AA	AA	AA	AA	--	AA	AA	GG	AA	AG	AA	GG	GG	GG	GG	AA	AA	GG	AA	AA	GG	AA	AA	AA	GG	AA	GG	GG
Gm05_997108_A_G	Gm05	2672539	GG	AA	AA	AA	AA	GG	AA	GG	GG	GG	GG	AA	AG	GG	AA	AA	AA	AA	AA	AA	AA	AA	AA	--	AA	AA	GG	AA	GG	AA	GG	GG	GG	GG	AA	AA	GG	AA	AA	GG	AA	GG	AA	GG	AA	GG	GG
Gm05_1043092_G_T	Gm05	2718523	TG	GG	GG	GG	GG	TG	GG	--	TT	TT	--	GG	--	TT	GG	GG	GG	--	GG	GG	GG	GG	--	--	GG	GG	TT	GG	TT	GG	TT	TT	TT	TT	GG	GG	TT	--	GG	TT	GG	TT	GG	TG	GG	TT	TT
Gm05_1062563_A_G	Gm05	2737995	AG	AA	AA	AA	AA	AG	AA	--	GG	GG	--	AA	--	GG	AA	AA	AA	AA	AA	AA	AA	AA	--	--	AA	AA	GG	AA	GG	AA	GG	GG	GG	GG	AA	AA	GG	--	AA	GG	AA	GG	AA	GG	AA	GG	GG
Gm05_1236013_A_C	Gm05	2911445	AC	AA	AA	AA	AA	AC	AA	--	CC	CC	AC	AA	AA	CC	AA	AA	AA	AA	AA	AA	AA	AA	--	--	AA	AA	CC	AA	CC	AA	CC	CC	CC	CC	AA	AA	CC	--	AA	CC	AA	CC	AA	CC	AA	CC	CC
Gm05_1490457_C_T	Gm05	3207293	TT	CC	CC	CC	CC	TT	CC	TT	TT	TT	TT	CC	CC	TT	CC	CC	CC	CC	CC	CC	CC	CC	CC	--	CC	CC	TT	CC	TT	CC	TT	TT	TT	TT	CC	CC	TT	CC	CC	TT	CC	TT	CC	TT	CC	TT	TT
Gm05_1500111_G_A	Gm05	3216947	AG	GG	GG	GG	GG	AG	GG	AG	AA	AA	AG	GG	GG	AA	GG	GG	GG	GG	GG	GG	GG	GG	--	--	GG	GG	AA	GG	--	GG	AA	AA	AA	AA	GG	GG	AA	GG	GG	AA	GG	AA	GG	AG	GG	AA	--
Gm05_1547102_C_T	Gm05	3263938	TC	CC	CC	CC	CC	TC	CC	--	TT	TT	--	CC	CC	TT	CC	CC	CC	CC	CC	CC	CC	CC	--	--	CC	CC	TT	CC	TT	CC	TT	TT	TT	TT	CC	CC	TT	CC	CC	TT	CC	TT	CC	TC	CC	TT	TT
Gm05_1705841_A_G	Gm05	3428900	GG	AA	AA	AA	AA	GG	AA	GG	GG	GG	GG	AA	AA	GG	AA	AA	AA	AA	AA	AA	AA	AA	AA	AG	AA	AA	GG	AA	AA	AA	GG	GG	GG	GG	AA	AA	GG	AA	AA	GG	AA	GG	AA	GG	AA	GG	GG
Gm05_2216235_A_G	Gm05	3939058	AA	AA	AA	AA	AA	AA	AA	AA	AA	AA	AA	AA	AA	AA	AA	AA	AA	AA	AA	AA	AA	AA	AA	AA	AA	AA	AA	AA	AA	AA	AA	AA	AA	AA	AA	AA	AA	AA	AA	AA	AA	AA	AA	AA	AA	AA	AA
Gm05_2548644_C_T	Gm05	4269814	TT	CC	CC	TT	CC	TT	CC	TT	TT	TT	CC	CC	CC	TT	CC	CC	TC	CC	CC	CC	CC	CC	CC	TC	CC	CC	TT	CC	CC	CC	TT	TT	TT	TT	TT	CC	TT	CC	CC	TT	CC	TT	CC	TT	CC	TT	TT
Gm05_2647363_C_T	Gm05	4368128	TT	TT	TT	TT	TT	TT	TT	TT	TT	TT	TT	TT	TT	TT	TT	TT	TT	TT	TT	TT	TT	TT	TT	TT	TT	TT	TT	TT	TT	TT	TT	TT	TT	TT	TT	TT	TT	TT	TT	TT	TT	TT	TT	TT	TT	TT	TT
Gm05_2674662_T_G	Gm05	4395428	GG	GG	GG	GG	GG	GG	GG	GG	GG	GG	GG	GG	GG	GG	GG	GG	GG	GG	GG	GG	GG	GG	GG	GG	GG	GG	GG	GG	GG	GG	GG	GG	GG	GG	GG	GG	GG	GG	GG	GG	GG	GG	GG	GG	GG	GG	GG
Gm05_2708074_T_C	Gm05	4423839	CC	CC	CC	CC	CC	CC	CC	CC	CC	CC	CC	CC	CC	CC	CC	CC	CC	CC	CC	CC	CC	CC	CC	CC	CC	CC	CC	CC	CC	CC	CC	CC	CC	CC	CC	CC	CC	CC	CC	CC	CC	CC	CC	CC	CC	CC	CC
Gm05_2967386_A_G	Gm05	4682233	GG	GG	GG	GG	GG	GG	GG	GG	GG	GG	GG	GG	GG	GG	GG	GG	GG	GG	GG	GG	GG	GG	GG	GG	GG	GG	GG	GG	GG	GG	GG	GG	GG	GG	GG	GG	GG	GG	GG	GG	GG	GG	GG	GG	GG	GG	GG
Gm05_3475990_T_C	Gm05	5192354	CC	CC	CC	CC	CC	CC	CC	CC	CC	CC	CC	CC	CC	CC	CC	CC	CC	CC	CC	CC	CC	CC	CC	CC	CC	CC	CC	CC	CC	CC	CC	CC	CC	CC	CC	CC	CC	CC	CC	CC	CC	CC	CC	CC	CC	CC	CC
Gm05_3505412_G_A	Gm05	5221711	AA	AA	AA	AA	AA	AA	AA	AA	AA	AA	AA	AA	AA	AA	AA	AA	AA	AA	AA	AA	AA	AA	AA	AA	AA	AA	AA	AA	AA	AA	AA	AA	AA	AA	AA	AA	AA	AA	AA	AA	AA	AA	AA	AA	AA	AA	AA
Gm05_3764264_C_T	Gm05	5480565	TT	TT	TT	TT	TT	TT	TT	TT	TT	TT	TT	TT	TT	TT	TT	TT	TT	TT	TT	TT	TT	TT	TT	TT	TT	TT	TT	TT	TT	TT	TT	TT	TT	TT	TT	TT	TT	TT	TT	TT	TT	TT	TT	TT	TT	TT	TT
Gm05_3859212_C_T	Gm05	5575791	CC	CC	CC	CC	CC	CC	CC	CC	CC	CC	CC	CC	CC	CC	CC	CC	CC	CC	CC	CC	CC	CC	CC	CC	CC	CC	CC	CC	CC	CC	CC	CC	CC	CC	CC	CC	CC	CC	CC	CC	CC	CC	CC	CC	CC	CC	CC
Gm05_3905135_T_C	Gm05	5621714	TT	TT	TT	TT	TT	TT	TT	TT	TT	TT	TT	TT	TT	TT	TT	TT	TT	TT	TT	TT	TT	TT	TC	TT	TT	TT	TT	TT	TT	TT	TT	TT	TT	TT	TT	TT	TT	TT	TT	TT	TT	TT	TT	TT	TT	TT	TT
Gm05_23799613_A_G	Gm05	24193817	GG	GG	GG	GG	GG	GG	AA	GG	GG	GG	AA	GG	GG	AA	GG	--	GG	AA	AA	GG	AA	GG	AA	GG	AA	GG	GG	GG	GG	AA	AA	GG	GG	GG	GG	GG	AG	AA	AA	GG	GG	AA	GG	GG	GG	GG	GG
Gm05_26685967_G_A	Gm05	27082044	AA	AA	AA	AA	AA	AA	GG	AA	AA	AA	GG	AA	AA	GG	AA	--	AA	GG	GG	AA	GG	AA	GG	AA	GG	AA	AA	AA	AA	GG	GG	AA	AA	AA	AA	AA	AG	GG	GG	AA	AA	GG	AA	AA	AA	AA	AA
Gm05_27214654_G_A	Gm05	27611613	AA	AA	AA	AA	AA	AA	GG	AA	AA	AA	--	AA	AA	GG	AA	AA	AA	--	--	AA	GG	AA	GG	AA	--	AA	AA	AA	AA	GG	GG	AA	AA	AA	AA	AA	--	--	AG	AA	AA	--	AA	AA	AA	AA	AA
Gm05_27365188_A_G	Gm05	27762168	GG	GG	GG	GG	GG	GG	AA	GG	--	GG	AA	GG	GG	AA	GG	AG	GG	AA	AA	GG	AA	GG	AA	--	AA	GG	GG	GG	GG	AA	AA	GG	GG	GG	GG	GG	--	AA	AA	GG	GG	AA	GG	GG	GG	GG	GG
Gm05_28259595_A_G	Gm05	28655905	AA	AA	AA	AA	AA	AA	AA	AA	AA	AA	AA	AA	AA	AA	AA	AA	AA	AA	AA	AA	AA	AA	AA	AA	AA	AA	AA	AA	AA	AA	AA	AA	AA	AA	AA	AA	AA	AA	AA	AA	AA	AA	AA	AA	AA	AA	AA
Gm05_28734075_T_C	Gm05	29122174	TT	TT	TT	TT	TT	TT	TT	TT	TT	TT	TT	TT	TT	TT	TT	TT	TT	TT	TT	TT	TT	TT	TT	TT	TT	TT	TT	TT	TT	TT	TT	TT	TT	TT	TT	TT	TT	TT	TT	TT	TT	TT	TT	TT	TT	TT	TT
Gm05_28856521_T_C	Gm05	29244629	TT	TT	TT	TT	TT	TT	TT	TT	TT	TT	TT	TT	TT	TT	TT	TT	TT	TT	TT	TT	TT	TT	TT	TT	TT	TT	TT	TT	TT	TT	TT	TT	TT	TT	TT	TT	TT	TT	TT	TT	TT	TT	TT	TT	TT	TT	TT
Gm05_28880254_G_A	Gm05	29268362	GG	GG	GG	GG	GG	GG	GG	GG	GG	GG	GG	GG	GG	GG	GG	GG	GG	GG	GG	GG	GG	GG	GG	GG	GG	GG	GG	GG	GG	GG	GG	GG	GG	GG	GG	GG	GG	GG	GG	GG	GG	GG	GG	GG	GG	GG	GG
Gm05_30753835_T_C	Gm05	31119733	TT	TT	TT	TT	TT	CC	CC	TT	TT	CC	CC	TT	TT	CC	CC	TT	CC	CC	CC	CC	CC	CC	CC	CC	CC	CC	TT	TT	TT	CC	CC	CC	TT	CC	CC	TT	TC	CC	CC	TT	CC	CC	TT	TT	TT	TT	TT
Gm05_31160955_A_G	Gm05	31427594	AA	AA	AA	AA	AA	GG	GG	AA	AA	--	GG	AA	AA	GG	GG	AA	GG	--	GG	GG	GG	--	AG	GG	GG	--	AA	AA	AA	GG	GG	GG	AA	GG	GG	AA	--	--	GG	AA	AG	GG	AA	AA	AA	AA	AA
Gm05_31454134_T_C	Gm05	31720739	TT	TT	TT	TT	TT	CC	CC	TT	TT	CC	CC	TT	TT	CC	CC	TT	CC	CC	CC	CC	CC	CC	CC	CC	CC	CC	TT	TT	TT	CC	CC	CC	TT	CC	CC	TT	TC	CC	CC	TT	CC	CC	TT	TT	TT	TT	TT
Gm05_31605772_A_G	Gm05	31873991	AA	AA	AA	AA	AA	GG	GG	AA	AA	GG	GG	AA	AA	GG	GG	AA	GG	GG	GG	GG	GG	GG	GG	GG	GG	GG	AA	AA	AA	GG	GG	GG	AA	GG	GG	AA	AG	GG	GG	AA	GG	GG	AA	AA	AA	AA	AA
Gm05_31767626_A_G	Gm05	32036641	GG	GG	GG	GG	GG	--	--	GG	GG	--	AA	GG	GG	AA	AA	GG	AA	--	AA	AA	--	AG	AG	AA	--	AG	GG	GG	GG	AA	AA	AA	GG	AA	AA	GG	--	AG	--	GG	AA	--	GG	GG	GG	GG	GG
Gm05_31827868_T_G	Gm05	32095735	GG	GG	GG	GG	GG	GG	GG	GG	GG	GG	GG	GG	GG	GG	GG	GG	GG	GG	GG	GG	GG	GG	GG	GG	GG	GG	GG	GG	GG	GG	GG	GG	GG	GG	GG	GG	GG	GG	GG	GG	GG	GG	GG	GG	GG	GG	GG
Gm05_32327497_T_C	Gm05	32594828	TT	TT	TT	TT	TT	CC	CC	TT	TT	CC	TT	TT	CC	CC	CC	TT	CC	CC	CC	CC	CC	CC	CC	CC	CC	CC	TT	TT	TT	CC	CC	CC	CC	CC	CC	TT	TT	CC	CC	TT	CC	CC	TT	CC	TT	TT	TT
Gm05_32361439_C_A	Gm05	32628753	CC	CC	CC	CC	CC	--	AC	CC	CC	AC	CC	CC	AA	AA	AA	CC	AA	AC	AA	AA	AA	AC	AC	AA	AC	AC	CC	CC	CC	AA	--	AA	AA	AA	AA	CC	CC	AC	--	CC	AA	AC	CC	AC	CC	CC	CC
Gm05_32565157_T_C	Gm05	32832462	TT	TT	TT	TT	TT	CC	TT	TT	TT	CC	TT	TT	CC	CC	CC	TT	CC	CC	CC	CC	CC	CC	CC	CC	CC	CC	TT	TT	TT	CC	CC	CC	CC	CC	CC	TT	TT	CC	CC	TT	CC	CC	TT	--	TT	TT	TT
Gm05_32654943_T_C	Gm05	32922250	TT	TT	TT	TT	TT	--	TT	TT	TT	TC	TT	TT	CC	CC	CC	TT	CC	TC	CC	CC	CC	--	TC	CC	CC	TC	TT	TT	--	CC	CC	CC	CC	CC	CC	TT	TT	TC	CC	TT	CC	--	TT	TC	TT	TT	TT
Gm05_32734184_G_A	Gm05	33001491	GG	GG	GG	GG	GG	AA	GG	GG	GG	AA	GG	GG	AA	AA	AA	GG	AA	AA	AA	AA	AA	AA	AA	AA	AA	AA	GG	GG	GG	AA	AA	AA	AA	AA	AA	GG	GG	AA	AA	GG	AA	AA	GG	AA	GG	GG	GG
Gm05_32980603_A_G	Gm05	33248314	AA	AG	AA	AA	AA	GG	AA	AA	GG	GG	AA	AA	GG	GG	GG	AA	GG	GG	GG	GG	GG	GG	--	GG	GG	GG	AA	AA	AA	GG	GG	GG	GG	GG	GG	AA	AA	GG	GG	AA	GG	GG	AA	--	AA	AA	AA
Gm05_33050904_A_G	Gm05	33318788	AA	--	AA	AA	AA	--	AA	AA	GG	AG	AA	AA	GG	GG	GG	AA	GG	--	GG	GG	GG	AG	AG	GG	GG	AG	AA	AA	GG	GG	GG	GG	GG	GG	GG	AA	AA	--	GG	AA	GG	--	AA	AG	AA	AA	AA
Gm05_33075880_T_C	Gm05	33343764	TT	--	TT	TT	TT	--	TT	TT	CC	--	TT	TT	CC	CC	CC	TT	CC	--	CC	CC	CC	TC	TC	CC	CC	TC	TT	TT	CC	CC	CC	CC	CC	CC	CC	TT	TT	TC	CC	TT	CC	--	TT	TC	TT	TT	TT
Gm05_33130272_A_G	Gm05	33398163	AA	AG	AA	AA	AA	GG	AA	AA	GG	GG	AA	AA	GG	GG	GG	AA	GG	GG	GG	GG	GG	GG	GG	GG	GG	GG	AA	AA	GG	GG	GG	GG	GG	GG	GG	AA	AA	GG	GG	AA	GG	GG	AA	--	AA	AA	AA
Gm05_33176582_G_A	Gm05	33444202	GG	AG	GG	GG	GG	AA	GG	GG	AA	AA	GG	GG	AA	AA	AA	GG	GG	AA	AA	AA	AA	AA	AA	AA	AA	AA	GG	GG	AA	AA	AA	AA	AA	AA	AA	GG	GG	AA	AA	GG	AA	AA	GG	--	GG	GG	GG
Gm05_33268964_T_G	Gm05	33536375	TT	TG	TT	TT	TT	GG	TT	TT	GG	GG	TT	TT	GG	GG	GG	TT	TT	GG	GG	GG	GG	GG	GG	GG	GG	GG	TT	TT	GG	GG	GG	GG	GG	GG	GG	TT	TT	GG	GG	TT	GG	GG	TT	--	TT	TT	TT
Gm05_33618722_T_C	Gm05	33887621	TT	TT	TT	TT	TT	TT	TT	TT	TT	TT	TT	TT	TT	TT	TT	TT	TT	TT	TT	TT	TT	TT	TT	TT	TT	TT	TT	TT	TT	TT	TT	TT	TT	TT	TT	TT	TT	TT	TT	TT	TT	TT	TT	TT	TT	TT	TT
Gm05_33737561_T_C	Gm05	34006356	TT	TT	TT	TT	TT	TT	TT	TT	TT	TT	TT	TT	TT	TT	TT	TT	TT	TT	TT	TT	TT	TT	TT	TT	TT	TT	TT	TT	TT	TT	TT	TT	TT	TT	TT	TT	TT	TT	TT	TT	TT	TT	TT	TT	TT	TT	TT
Gm05_33785297_T_C	Gm05	34054092	TT	TT	TT	TT	TT	TT	TT	TT	TT	TT	TT	TT	TT	TT	TT	TT	TT	TT	TT	TT	TT	TT	TT	TT	TT	TT	TT	TT	TT	TT	TT	TT	TT	TT	TT	TT	TT	TT	TT	TT	TT	TT	TT	TT	TT	TT	TT
Gm05_33843473_C_T	Gm05	34112269	CC	CC	CC	CC	CC	CC	CC	CC	CC	CC	CC	CC	CC	CC	CC	CC	CC	CC	CC	CC	CC	CC	CC	CC	CC	CC	CC	CC	CC	CC	CC	CC	CC	CC	CC	CC	CC	CC	CC	CC	CC	CC	CC	CC	CC	CC	CC
Gm05_34081675_A_G	Gm05	34352276	AA	AA	AA	AA	AA	AA	AA	AA	AA	AA	AA	AA	AA	AA	AA	AA	AA	AA	AA	AA	AA	AA	AA	AA	AA	AA	AA	AA	AA	AA	AA	AA	AA	AA	AA	AA	AA	AA	AA	AA	AA	AA	AA	AA	AA	AA	AA
Gm05_34190449_C_T	Gm05	34461135	CC	CC	CC	CC	CC	CC	CC	CC	CC	CC	CC	CC	CC	CC	CC	CC	CC	CC	CC	CC	CC	CC	CC	CC	CC	CC	CC	CC	CC	CC	CC	CC	CC	CC	CC	CC	CC	CC	CC	CC	CC	CC	CC	CC	CC	CC	CC
Gm05_34570503_C_A	Gm05	34841194	CC	CC	CC	CC	CC	CC	CC	CC	CC	CC	CC	CC	CC	CC	CC	CC	CC	CC	CC	CC	CC	CC	CC	CC	CC	CC	CC	CC	CC	CC	CC	CC	CC	CC	CC	CC	CC	CC	CC	CC	CC	CC	CC	--	CC	CC	CC
Gm05_34692879_G_T	Gm05	34963636	GG	GG	GG	GG	GG	GG	TT	GG	GG	TT	GG	GG	GG	TT	GG	GG	GG	TT	GG	GG	TT	GG	GG	GG	TT	GG	GG	GG	GG	TT	GG	GG	GG	GG	GG	GG	GG	TT	TT	GG	GG	TT	GG	--	GG	GG	GG
Gm05_34765648_A_G	Gm05	35036404	AA	AA	AA	AA	AA	AA	GG	AA	AA	GG	AA	AA	AA	GG	AA	AA	AA	GG	AA	AA	GG	AA	AA	AA	GG	AA	AA	AA	AA	GG	AA	AA	AA	AA	AA	AA	AA	GG	GG	AA	AA	GG	AA	AA	AA	AA	AA
Gm05_34801979_T_G	Gm05	35072735	TT	TT	TT	TT	TT	TT	GG	TT	TT	GG	TT	TT	TT	GG	TT	TT	TT	GG	TT	TT	GG	TT	TT	TT	GG	TT	TT	TT	TT	GG	TT	TT	TT	TT	TT	TT	TT	GG	GG	TT	TT	GG	TT	TT	TT	TT	TT
Gm05_34830575_G_A	Gm05	35101291	GG	GG	GG	GG	GG	GG	AA	GG	GG	AA	GG	GG	GG	AA	GG	GG	GG	AA	GG	GG	AA	GG	GG	GG	AA	GG	GG	GG	GG	AA	GG	GG	GG	GG	GG	GG	GG	AA	AA	GG	GG	AA	GG	GG	GG	GG	GG
Gm05_34939267_A_G	Gm05	35209993	AA	--	GG	--	AA	GG	GG	AA	GG	GG	AA	AA	GG	GG	GG	AG	GG	GG	--	GG	GG	GG	AG	GG	GG	GG	AA	AA	GG	GG	AA	GG	GG	GG	GG	GG	AA	GG	GG	AA	GG	GG	AA	--	AA	AA	AA
Gm05_34976496_A_G	Gm05	35247222	AA	AG	GG	AA	AA	GG	GG	AA	GG	GG	AA	AA	GG	GG	GG	AA	GG	GG	AA	GG	GG	GG	AA	GG	GG	GG	AA	AA	GG	GG	AA	GG	GG	GG	GG	GG	AA	GG	GG	AA	GG	GG	AA	--	AA	AA	AA
Gm05_35039076_C_T	Gm05	35309800	CC	CC	CC	CC	CC	CC	TT	CC	CC	TT	CC	CC	CC	TT	CC	CC	CC	TT	CC	CC	TT	CC	CC	CC	TT	CC	CC	CC	CC	TT	CC	CC	CC	CC	CC	CC	CC	TT	TT	CC	CC	TT	CC	CC	CC	CC	CC
Gm05_35103944_A_G	Gm05	35374668	AA	AA	AG	AA	AA	AA	GG	AA	AA	GG	AA	AA	AA	GG	AA	AG	AA	GG	AA	AA	GG	AA	AA	AA	GG	AG	AA	GG	AA	GG	AA	AA	AA	AA	AA	AA	AA	GG	GG	AA	AA	GG	AA	AG	AA	AA	AA
Gm05_35326427_C_T	Gm05	35597149	CC	CC	CC	CC	CC	CC	TT	CC	CC	TT	CC	CC	CC	TT	CC	CC	CC	TT	CC	CC	TT	CC	CC	CC	TT	CC	CC	TT	CC	TT	CC	CC	CC	CC	CC	CC	CC	TT	TT	CC	CC	TT	CC	CC	CC	CC	CC
Gm05_35368098_A_C	Gm05	35638821	AA	AA	--	AA	AA	AA	CC	AA	AA	CC	AA	AA	AA	CC	AA	--	AA	CC	AA	AA	CC	AA	AA	AA	CC	AC	AA	CC	AA	CC	AA	AA	AA	AA	AA	AA	AA	CC	CC	AA	AA	CC	AA	AC	AA	AA	AA
Gm05_35518408_T_C	Gm05	35789512	TT	TT	TT	TT	TT	TT	CC	TT	TT	CC	TT	TT	TT	CC	TT	TT	TT	CC	TT	TT	CC	TT	TT	TT	CC	TT	TT	CC	TT	CC	TT	TT	TT	TT	TT	TT	TT	CC	CC	TT	TT	CC	TT	TT	TT	TT	TT
Gm05_35690382_A_G	Gm05	35961486	AA	AA	GG	AA	AA	GG	AA	AA	GG	AA	AA	AA	GG	AA	GG	AA	GG	AA	AA	GG	AA	GG	AA	GG	AA	GG	AA	AA	GG	AA	AA	GG	GG	GG	GG	GG	AA	AA	AA	AA	GG	AA	AA	AG	AA	AA	AA
Gm05_35724027_A_G	Gm05	35995131	AA	AA	GG	AA	AA	--	--	AA	GG	AG	AA	AA	GG	GG	GG	AA	GG	AG	AA	GG	GG	AG	AA	--	GG	GG	AA	GG	AG	GG	AA	GG	GG	GG	GG	GG	AA	AG	GG	AA	GG	AG	AA	--	AA	AA	AA
Gm05_35754878_C_A	Gm05	36025982	CC	CC	AC	CC	CC	--	CC	CC	--	CC	CC	CC	AA	CC	--	CC	AA	CC	CC	AA	CC	AC	CC	--	CC	AC	CC	CC	AC	CC	CC	AA	AA	AA	AA	AA	CC	CC	CC	CC	AA	CC	CC	--	CC	CC	CC
Gm05_35788006_T_C	Gm05	36046937	TT	TT	CC	TT	TT	CC	TT	TT	CC	TT	TT	TT	CC	TT	CC	TT	CC	TT	TT	CC	TT	CC	TT	CC	TT	CC	TT	TT	CC	TT	TT	CC	CC	CC	CC	CC	TT	TT	TT	TT	CC	TT	TT	TC	TT	TT	TT
Gm05_35992617_T_C	Gm05	36275578	TT	TT	TT	TT	TT	TT	CC	TT	TT	CC	TT	TT	TT	CC	TT	TT	TT	CC	TT	TT	CC	TT	TT	TT	CC	TT	TT	CC	TT	CC	TT	TT	TT	TT	TT	TT	TT	CC	CC	TT	TT	CC	TT	TT	TT	TT	TT
Gm05_36028909_A_G	Gm05	36311870	AA	AA	GG	AA	AA	GG	GG	AA	GG	GG	AA	--	GG	GG	GG	AA	GG	GG	AA	GG	GG	GG	AA	GG	GG	GG	AA	GG	GG	GG	AA	GG	GG	GG	GG	GG	AA	GG	GG	AA	GG	GG	AA	GG	AA	AA	AA
Gm05_36115730_C_T	Gm05	36398530	CC	CC	TT	CC	CC	TT	CC	CC	TT	CC	CC	CC	TT	CC	TT	CC	TT	CC	CC	TT	CC	TT	CC	TT	CC	TT	CC	CC	TT	CC	CC	TT	TT	TT	TT	TT	CC	CC	CC	CC	TT	CC	CC	TC	CC	CC	CC
Gm05_36558442_C_T	Gm05	36841215	CC	CC	CC	CC	CC	CC	CC	CC	CC	CC	CC	CC	CC	CC	CC	CC	CC	CC	CC	CC	CC	CC	CC	CC	CC	CC	CC	CC	CC	CC	CC	CC	CC	CC	CC	CC	CC	CC	CC	CC	CC	CC	CC	CC	CC	CC	CC
Gm05_36626022_A_G	Gm05	36917839	AA	AA	GG	AA	AA	GG	AA	AA	GG	AA	AA	--	GG	AA	GG	AA	GG	AA	AA	GG	AA	GG	AA	GG	AA	GG	AA	AA	GG	AA	AA	GG	GG	GG	GG	GG	AA	AA	AA	AA	GG	AA	AA	AG	AA	AA	AA
Gm05_36671535_C_T	Gm05	36962030	CC	CC	CC	CC	CC	CC	TT	CC	TT	TT	CC	--	TT	TT	CC	CC	TT	TT	CC	CC	TT	TT	CC	TT	TT	CC	CC	TT	CC	TT	CC	TT	TT	CC	TT	CC	CC	TT	TT	CC	CC	TT	TT	TT	TT	CC	TT
Gm05_36749252_T_C	Gm05	37039750	TC	TT	TC	CC	TT	TT	CC	TT	CC	CC	CC	--	CC	CC	TT	TC	CC	CC	--	TT	CC	CC	--	CC	CC	TC	TT	CC	TT	CC	CC	CC	CC	TT	CC	TT	TT	CC	CC	TT	TT	CC	CC	CC	CC	TT	CC
Gm05_36769351_T_G	Gm05	37059445	TG	TT	TG	GG	TT	TT	GG	TT	GG	GG	GG	TG	GG	GG	TT	TG	GG	GG	--	TT	GG	GG	--	GG	GG	TG	TT	GG	TT	GG	GG	GG	GG	TT	GG	TT	TT	GG	GG	TT	TT	GG	GG	GG	GG	TT	GG
Gm05_36849833_T_C	Gm05	37139944	TT	TT	TT	TT	TT	TT	TT	TT	TT	TT	TT	TT	TT	TT	TT	TT	TT	TT	TT	TT	TT	TT	TT	TT	TT	TT	TT	TT	TT	TT	TT	TT	TT	TT	TT	TT	TT	TT	TT	TT	TT	TT	TT	TT	TT	TT	TT
Gm05_37043636_A_C	Gm05	37333428	AC	AA	AA	CC	AA	AA	CC	AA	CC	CC	CC	--	CC	CC	AA	AA	CC	CC	AA	AA	CC	CC	AA	CC	CC	AA	AA	CC	AA	CC	CC	CC	CC	AA	CC	AA	AA	CC	CC	AA	AA	CC	CC	CC	CC	AA	CC
Gm05_37071607_G_A	Gm05	37361399	AG	--	GG	GG	AA	GG	GG	AA	GG	GG	GG	--	GG	GG	GG	AG	GG	GG	--	GG	GG	GG	--	GG	GG	GG	AA	GG	--	GG	GG	GG	GG	GG	GG	GG	AA	GG	GG	AA	AA	GG	GG	GG	GG	AA	GG
Gm05_37115396_A_G	Gm05	37405444	GG	GG	AG	GG	GG	AG	GG	GG	GG	GG	GG	GG	GG	GG	AA	GG	GG	GG	GG	AA	GG	GG	GG	GG	GG	AG	GG	GG	AG	GG	GG	GG	GG	AA	GG	AA	GG	GG	GG	GG	GG	GG	GG	GG	GG	GG	GG
Gm05_37194257_T_C	Gm05	37484301	CC	--	CC	CC	--	TT	CC	--	CC	CC	CC	CC	CC	CC	TT	CC	CC	CC	CC	TT	CC	CC	CC	CC	CC	TT	--	CC	TT	CC	CC	CC	CC	TT	CC	TT	--	CC	CC	--	--	CC	CC	CC	CC	--	CC
Gm05_37260149_A_G	Gm05	37550193	GG	GG	--	GG	GG	--	GG	GG	GG	GG	GG	GG	GG	GG	AA	GG	GG	GG	GG	AA	GG	GG	GG	GG	GG	AG	GG	GG	--	GG	GG	GG	GG	AA	GG	AA	GG	GG	GG	GG	GG	GG	GG	GG	GG	GG	GG
Gm05_37305888_A_G	Gm05	37595926	AG	AA	AA	GG	AA	AA	GG	AA	GG	GG	GG	AA	GG	GG	AA	AA	GG	GG	AA	AA	GG	GG	AA	GG	GG	AA	AA	GG	AA	GG	GG	GG	GG	AA	GG	AA	AA	GG	GG	AA	AA	GG	GG	GG	GG	AA	GG
Gm05_37409751_C_T	Gm05	37699648	TC	TT	--	CC	TT	CC	CC	TT	CC	CC	CC	TT	CC	CC	CC	TT	CC	CC	TT	CC	CC	CC	TT	CC	CC	CC	TT	CC	CC	CC	CC	CC	CC	CC	CC	CC	TT	CC	CC	TT	TT	CC	CC	CC	CC	TT	CC
Gm05_37480785_T_C	Gm05	37770680	CC	CC	TC	CC	CC	TT	CC	CC	CC	CC	CC	CC	CC	CC	TT	CC	CC	CC	CC	TT	CC	CC	CC	CC	CC	TT	CC	CC	TT	CC	CC	CC	CC	TT	CC	TT	CC	CC	CC	CC	CC	CC	CC	CC	CC	CC	CC
Gm05_37592640_T_C	Gm05	37882533	TC	CC	TC	TT	CC	TT	TT	CC	TT	TT	TT	CC	TT	TT	TT	CC	TT	TT	CC	TT	TT	TT	CC	TT	TT	TT	CC	TT	TT	TT	TT	TT	TT	TT	TT	TT	TT	TT	TT	CC	CC	TT	TT	TT	TT	TT	TT
Gm05_37611048_C_T	Gm05	37900941	TT	--	--	TT	TT	--	TT	TT	TT	TT	TT	TT	TT	TT	CC	TT	TT	TT	TT	CC	TT	TT	TT	TT	TT	--	TT	TT	TC	TT	TT	TT	TT	CC	TT	CC	TT	TT	TT	TT	TT	TT	TT	TT	TT	TT	TT
Gm05_37650940_T_C	Gm05	37940835	TC	CC	TC	TT	CC	TT	TT	CC	TT	TT	TT	--	TT	TT	TT	CC	TT	TT	CC	TT	TT	TT	CC	TT	TT	TT	CC	TT	TT	TT	TT	TT	TT	TT	TT	TT	TT	TT	TT	CC	CC	TT	TT	TT	TT	TT	TT
Gm05_37848366_C_A	Gm05	38138511	AC	CC	CC	AA	CC	CC	AA	CC	AA	AA	AA	CC	AA	AA	CC	CC	AA	AA	CC	CC	AA	AA	CC	AA	AA	CC	CC	AA	CC	AA	AA	AA	AA	CC	AA	CC	AA	AA	AA	CC	CC	AA	AA	AA	AA	AA	AA
Gm05_37990846_C_T	Gm05	38280990	TT	TT	--	TT	TT	TC	TT	TT	TT	TT	TT	TT	TT	TT	CC	TC	TT	TT	TT	CC	TT	TT	TT	TT	TT	TC	TT	TT	TC	TT	TT	TT	TT	CC	TT	CC	TT	TT	TT	TT	TT	TT	TT	TT	TT	TT	TT
Gm05_38036821_A_C	Gm05	38326967	CC	CC	--	CC	CC	AC	CC	CC	CC	CC	CC	CC	CC	CC	AA	AC	CC	CC	CC	AA	CC	CC	CC	CC	CC	AC	CC	CC	AC	CC	CC	CC	CC	AA	CC	AA	CC	CC	CC	CC	CC	CC	CC	CC	CC	CC	CC
Gm05_38073855_C_T	Gm05	38364001	TT	TT	TC	TT	TT	CC	TT	TT	TT	TT	TT	TT	TT	TT	CC	CC	TT	TT	TT	CC	TT	TT	TT	TT	TT	CC	TT	TT	CC	TT	TT	TT	TT	CC	TT	CC	TT	TT	TT	TT	TT	TT	TT	TT	TT	TT	TT
Gm05_38098748_C_A	Gm05	38388893	AA	AA	AC	AA	AA	CC	AA	AA	AA	AA	AA	AA	AA	AA	CC	CC	AA	AA	AA	CC	AA	AA	AA	AA	AA	CC	AA	AA	CC	AA	AA	AA	AA	CC	AA	CC	AA	AA	AA	AA	AA	AA	AA	AA	AA	AA	AA
Gm05_41866018_G_A	Gm05	38472343	AA	AA	AG	AA	AA	GG	AA	AA	AA	AA	AA	AA	AA	AA	GG	GG	AA	AA	AA	GG	AA	AA	AA	AA	AA	GG	AA	AA	GG	AA	AA	AA	AA	GG	AA	GG	AA	AA	AA	AA	AA	AA	AA	AA	AA	AA	AA
Gm05_41740936_C_T	Gm05	38597425	TT	TT	TC	TT	TT	CC	TT	TT	TT	TT	TT	TT	TT	TT	CC	CC	TT	TT	TT	CC	TT	TT	TT	TT	TT	CC	TT	TT	CC	TT	TT	TT	TT	CC	TT	CC	TT	TT	TT	TT	TT	TT	TT	TT	TT	TT	TT
Gm05_41658399_C_T	Gm05	38679910	TT	TT	TC	TT	TT	CC	TT	TT	TT	TT	TT	TT	TT	TT	CC	CC	TT	TT	TT	CC	TT	TT	TT	TT	TT	CC	TT	TT	CC	TT	TT	TT	TT	CC	TT	CC	TT	TT	TT	TT	TT	TT	TT	TT	TT	TT	TT
Gm05_41638179_T_C	Gm05	38700130	CC	CC	--	CC	CC	--	CC	CC	CC	CC	CC	CC	CC	CC	TT	--	CC	CC	CC	TT	CC	CC	CC	CC	CC	TC	CC	CC	TC	CC	CC	CC	CC	TT	CC	TT	CC	CC	CC	CC	CC	CC	CC	CC	CC	CC	CC
Gm05_41481303_T_C	Gm05	38856557	CC	CC	TC	CC	CC	TT	CC	CC	CC	CC	CC	CC	CC	CC	TT	TT	CC	CC	CC	TT	CC	CC	CC	CC	CC	TT	CC	CC	TT	CC	CC	CC	CC	TT	CC	TT	CC	CC	CC	CC	CC	CC	CC	CC	CC	CC	CC
Gm05_41446899_T_C	Gm05	38890959	CC	CC	--	CC	CC	--	CC	CC	CC	CC	CC	CC	CC	CC	TT	--	CC	CC	CC	TT	CC	CC	CC	CC	CC	TC	CC	CC	TC	CC	CC	CC	CC	TT	CC	TT	CC	CC	CC	CC	CC	CC	CC	CC	CC	CC	CC
Gm05_41344316_C_T	Gm05	38993543	TT	TT	TC	TT	TT	CC	TT	TT	TT	TT	TT	TT	TT	TT	CC	CC	TT	TT	TT	CC	TT	TT	TT	TT	TT	CC	TT	TT	CC	TT	TT	TT	TT	CC	TT	CC	TT	TT	TT	TT	TT	TT	TT	TT	TT	TT	TT
Gm05_41240881_A_G	Gm05	39097082	GG	GG	--	GG	GG	AA	GG	GG	GG	GG	GG	GG	GG	GG	AA	AA	GG	GG	GG	AA	GG	GG	GG	GG	--	AA	GG	GG	AA	GG	GG	GG	GG	AA	GG	AA	GG	GG	GG	GG	GG	GG	GG	GG	GG	GG	GG
Gm05_41186986_G_A	Gm05	39151875	AG	--	AG	GG	AA	--	GG	AA	GG	GG	GG	AA	AA	GG	GG	GG	GG	GG	GG	GG	GG	GG	--	AA	AA	GG	AA	GG	GG	--	GG	GG	GG	GG	AA	GG	GG	GG	--	AA	AA	GG	GG	GG	GG	GG	GG
Gm05_41151290_T_C	Gm05	39187571	CC	--	TC	CC	CC	TT	CC	CC	CC	CC	CC	CC	CC	CC	TT	TT	CC	CC	CC	TT	CC	CC	--	CC	CC	TT	CC	CC	TT	CC	CC	CC	CC	TT	CC	TT	CC	CC	CC	CC	CC	CC	CC	CC	CC	CC	CC
Gm05_41066968_A_G	Gm05	39271942	GG	GG	--	GG	GG	AG	GG	GG	GG	GG	GG	GG	GG	GG	AA	AG	GG	GG	GG	AA	GG	GG	GG	GG	GG	--	GG	GG	AG	GG	GG	GG	GG	AA	GG	AA	GG	GG	GG	GG	GG	GG	GG	GG	GG	GG	GG
Gm05_40942868_G_A	Gm05	39396012	AA	AA	--	AA	AA	GG	AA	AA	AA	AA	AA	AA	AA	AA	GG	GG	AA	AA	AA	GG	AA	AA	AA	AA	AA	GG	AA	AA	GG	AA	AA	AA	AA	GG	AA	GG	AA	AA	AA	AA	AA	AA	AA	AA	AA	AA	AA
Gm05_40919406_C_T	Gm05	39419467	CC	CC	CC	CC	CC	CC	CC	CC	CC	CC	CC	CC	CC	CC	CC	CC	CC	CC	CC	CC	CC	CC	CC	CC	CC	CC	CC	CC	CC	CC	CC	CC	CC	CC	CC	CC	CC	CC	CC	CC	CC	CC	CC	CC	CC	CC	CC
Gm05_40824886_T_C	Gm05	39513987	TC	TT	TC	CC	TT	CC	CC	TT	CC	CC	CC	TT	TT	CC	CC	CC	CC	CC	CC	CC	CC	CC	TT	TT	TT	CC	TT	CC	CC	TC	CC	CC	CC	CC	TT	CC	CC	CC	CC	TT	TT	CC	CC	CC	CC	CC	CC
Gm05_40791973_A_G	Gm05	39546900	AG	AA	AG	GG	AA	GG	GG	AA	GG	GG	GG	AA	AA	GG	GG	GG	GG	GG	GG	GG	GG	GG	AA	AA	AA	GG	AA	GG	GG	AG	GG	GG	GG	GG	AA	GG	GG	GG	GG	AA	AA	GG	GG	GG	GG	GG	GG
Gm05_40642754_C_A	Gm05	39696120	CC	CC	AC	CC	CC	AA	CC	CC	CC	CC	CC	CC	CC	CC	AA	AA	CC	CC	CC	AA	CC	CC	CC	CC	CC	AA	CC	CC	AA	CC	CC	CC	CC	AA	CC	AA	CC	CC	CC	CC	CC	CC	CC	CC	CC	CC	CC
Gm05_40528969_T_G	Gm05	39809905	TG	TT	TG	GG	TT	GG	GG	TT	GG	GG	GG	TT	TT	GG	GG	GG	GG	GG	GG	GG	GG	GG	TT	TT	TT	GG	TT	GG	GG	TG	GG	GG	GG	GG	TT	GG	GG	GG	GG	TT	TT	GG	GG	GG	GG	GG	GG
Gm05_40517408_T_C	Gm05	39821466	--	TT	--	--	TT	TC	CC	TT	CC	--	--	TT	TT	CC	CC	CC	CC	CC	--	CC	CC	CC	TT	TT	TT	CC	TT	CC	--	--	CC	CC	CC	CC	TT	CC	CC	CC	TC	TT	TT	--	CC	CC	CC	CC	CC
Gm05_40452052_G_T	Gm05	39886822	TG	GG	TG	TT	GG	TT	TT	GG	TT	TT	TT	GG	GG	TT	TT	TT	TT	TT	TT	TT	TT	TT	GG	GG	GG	TT	GG	TT	TT	TG	TT	TT	TT	TT	GG	TT	TT	TT	TT	GG	GG	TT	TT	TT	TT	TT	TT
Gm05_40349605_T_C	Gm05	39990476	TC	TT	TC	CC	TT	CC	CC	TT	CC	CC	CC	TT	TT	CC	CC	CC	CC	CC	CC	CC	CC	CC	TT	TT	TT	CC	TT	CC	CC	TC	CC	CC	CC	CC	TT	CC	CC	CC	CC	TT	TT	CC	CC	CC	CC	CC	CC
Gm05_40299923_A_G	Gm05	40040158	AA	AA	AG	AA	AA	GG	AA	AA	AA	AA	AA	AA	AA	AA	GG	GG	AA	AA	AA	GG	AA	AA	AA	AA	AA	GG	AA	AA	GG	AA	AA	AA	AA	GG	AA	GG	AA	AA	AA	AA	AA	AA	AA	AA	AA	AA	AA
Gm05_40169104_G_A	Gm05	40170977	GG	GG	--	GG	GG	AG	GG	GG	GG	GG	GG	GG	GG	GG	AA	AG	GG	GG	GG	AA	GG	GG	GG	GG	GG	AG	GG	GG	AG	GG	GG	GG	GG	AA	GG	AA	GG	GG	GG	GG	GG	GG	GG	GG	GG	GG	GG
Gm05_40147071_T_C	Gm05	40193010	TT	TT	TC	TT	TT	CC	TT	TT	TT	TT	TT	TT	TT	TT	CC	CC	TT	TT	TT	CC	TT	TT	TT	TT	TT	CC	TT	TT	CC	TT	TT	TT	TT	CC	TT	CC	TT	TT	TT	TT	TT	TT	TT	TT	TT	TT	TT
Gm05_40044590_T_G	Gm05	40295481	TT	TT	TG	TT	TT	GG	TT	TT	TT	TT	TT	TT	TT	TT	GG	GG	TT	TT	TT	GG	TT	TT	TT	TT	TT	GG	TT	TT	GG	TT	TT	TT	TT	GG	TT	GG	TT	TT	TT	TT	TT	TT	TT	TT	TT	TT	TT
Gm05_39858447_T_C	Gm05	40481751	TT	TT	TC	TT	TT	CC	TT	TT	TT	TT	TT	TT	TT	TT	CC	CC	TT	TT	TT	CC	TT	TT	TT	TT	TT	CC	TT	TT	CC	TT	TT	TT	TT	CC	TT	CC	TT	TT	TT	TT	TT	TT	TT	TT	TT	TT	TT
Gm05_39655552_A_C	Gm05	40684517	AA	AA	AC	AA	AA	CC	AA	AA	AA	AA	AA	AA	AA	AA	CC	CC	AA	AA	AA	CC	AA	AA	AA	AA	AA	CC	AA	AA	CC	AA	AA	AA	AA	CC	AA	CC	AA	AA	AA	AA	AA	AA	AA	AA	AA	AA	AA
Gm05_39643904_T_C	Gm05	40696165	TT	TT	TC	TT	TT	CC	TT	TT	TT	TT	TT	TT	TT	TT	CC	CC	TT	TT	TT	CC	TT	TT	TT	TT	TT	CC	TT	TT	CC	TT	TT	TT	TT	CC	TT	CC	TT	TT	TT	TT	TT	TT	TT	TT	TT	TT	TT
Gm05_39374746_C_T	Gm05	40974254	CC	CC	TC	CC	CC	TT	CC	CC	CC	CC	CC	CC	CC	CC	TT	TT	CC	CC	CC	TT	CC	CC	CC	CC	CC	TT	CC	CC	TT	CC	CC	CC	CC	TT	CC	TT	CC	CC	CC	CC	CC	CC	CC	CC	CC	CC	CC
Gm05_39341525_C_T	Gm05	41007475	CC	CC	--	CC	CC	TC	CC	CC	CC	CC	CC	CC	CC	CC	TC	TC	CC	CC	CC	TC	CC	CC	CC	CC	CC	TC	CC	CC	TC	CC	CC	CC	CC	TC	CC	TC	CC	CC	CC	CC	CC	CC	CC	CC	CC	CC	CC
Gm05_39273308_T_G	Gm05	41075707	TT	TT	TG	TT	TT	GG	TT	TT	TT	TT	TT	TT	TT	TT	GG	GG	TT	TT	TT	GG	TT	TT	TT	TT	TT	GG	TT	TT	GG	TT	TT	TT	TT	GG	TT	GG	TT	TT	TT	TT	TT	TT	TT	TT	TT	TT	TT
Gm06_489058_C_A	Gm06	493964	AA	AA	AA	AA	AA	AA	AA	AA	AA	AA	AA	AA	AA	AA	AA	AA	AA	AA	AA	AA	AA	AA	AA	AA	AA	AA	AA	AA	AA	AA	AA	AA	AA	AA	AA	AA	AA	AA	AA	AA	AA	AA	AA	AA	AA	AA	AA
Gm06_496825_G_A	Gm06	501731	GG	GG	GG	GG	GG	GG	GG	GG	GG	GG	GG	GG	GG	GG	GG	GG	GG	GG	GG	GG	GG	GG	GG	GG	GG	GG	GG	GG	GG	GG	GG	GG	GG	GG	GG	GG	GG	GG	GG	GG	GG	GG	GG	GG	GG	GG	GG
Gm06_657590_T_G	Gm06	669123	GG	GG	GG	GG	GG	GG	GG	GG	GG	GG	GG	GG	GG	GG	GG	GG	GG	GG	GG	GG	GG	GG	GG	GG	GG	GG	GG	GG	GG	GG	GG	GG	GG	GG	GG	GG	GG	GG	GG	GG	GG	GG	GG	GG	GG	GG	GG
Gm06_732091_G_A	Gm06	743583	GG	GG	GG	GG	GG	GG	GG	GG	GG	GG	GG	GG	GG	GG	GG	GG	GG	GG	GG	GG	GG	GG	GG	GG	GG	GG	GG	GG	GG	GG	GG	GG	GG	GG	GG	GG	GG	GG	GG	GG	GG	GG	GG	GG	GG	GG	GG
Gm06_909751_C_T	Gm06	921254	CC	CC	CC	CC	CC	CC	CC	CC	CC	CC	CC	CC	CC	CC	CC	CC	CC	CC	CC	CC	CC	CC	CC	CC	CC	CC	CC	CC	CC	CC	CC	CC	CC	CC	CC	CC	CC	CC	CC	CC	CC	CC	CC	CC	CC	CC	CC
Gm06_969495_G_T	Gm06	980998	GG	GG	GG	GG	GG	GG	GG	GG	GG	GG	GG	GG	GG	GG	GG	GG	GG	GG	GG	GG	GG	GG	GG	GG	GG	GG	GG	GG	GG	GG	GG	GG	GG	GG	GG	GG	GG	GG	GG	GG	GG	GG	GG	GG	GG	GG	GG
Gm06_1006528_G_A	Gm06	1018033	GG	GG	GG	GG	GG	GG	GG	GG	GG	GG	GG	GG	GG	GG	GG	GG	GG	GG	GG	GG	GG	GG	GG	GG	GG	GG	GG	GG	GG	GG	GG	GG	GG	GG	GG	GG	GG	GG	GG	GG	GG	GG	GG	GG	GG	GG	GG
Gm06_1101232_T_C	Gm06	1118921	TT	TT	TT	TT	TT	TT	TT	TT	TT	TT	TT	TT	TT	TT	TT	TT	TT	TT	TT	TT	TT	TT	TT	TT	TT	TT	TT	TT	TT	TT	TT	TT	TT	TT	TT	TT	TT	TT	TT	TT	TT	TT	TT	TT	TT	TT	TT
Gm06_1216803_A_C	Gm06	1234490	AA	AA	AA	AA	AA	AA	AA	AA	AA	AA	AA	AA	AA	AA	AA	AA	AA	AA	AA	AA	AA	AA	AA	AA	AA	AA	AA	AA	AA	AA	AA	AA	AA	AA	AA	AA	AA	AA	AA	AA	AA	AA	AA	AA	AA	AA	AA
Gm06_1328895_T_C	Gm06	1346405	TT	TT	TT	TT	TT	TT	TT	TT	TT	TT	TT	TT	TT	TT	TT	TT	TT	TT	TT	TT	TT	TT	TT	TT	TT	TT	TT	TT	TT	TT	TT	TT	TT	TT	TT	TT	TT	TT	TT	TT	TT	TT	TT	TT	TT	TT	TT
Gm06_1387164_A_G	Gm06	1404673	AA	AA	AA	AA	AA	AA	AA	AA	AA	AA	AA	AA	AA	AA	AA	AA	AA	AA	AA	AA	AA	AA	AA	AA	AA	AA	AA	AA	AA	AA	AA	AA	AA	AA	AA	AA	AA	AA	AA	AA	AA	AA	AA	AA	AA	AA	AA
Gm06_1454403_A_C	Gm06	1472218	AA	AA	AA	AA	AA	AA	AA	AA	AA	AA	AA	AA	AA	AA	AA	AA	AA	AA	AA	AA	AA	AA	AA	AA	AA	AA	AA	AA	AA	AA	AA	AA	AA	AA	AA	AA	AA	AA	AA	AA	AA	AA	AA	AA	AA	AA	AA
Gm06_1514202_T_C	Gm06	1532017	TT	TT	TT	TT	TT	TT	TT	TT	TT	TT	TT	TT	TT	TT	TT	TT	TT	TT	TT	TT	TT	TT	TT	TT	TT	TT	TT	TT	TT	TT	TT	TT	TT	TT	TT	TT	TT	TT	TT	TT	TT	TT	TT	TT	TT	TT	TT
Gm06_2086304_T_C	Gm06	2104129	TT	TT	TT	TT	TT	TT	TT	TT	TT	TT	TT	TT	TT	TT	TT	TT	TT	TT	TT	TT	TT	TT	TT	TT	TT	TT	TT	TT	TT	TT	TT	TT	TT	TT	TT	TT	TT	TT	TT	TT	TT	TT	TT	TT	TT	TT	TT
Gm06_2325487_G_T	Gm06	2352768	GG	GG	GG	GG	GG	GG	GG	GG	GG	GG	GG	GG	GG	GG	GG	GG	GG	GG	GG	GG	GG	GG	GG	GG	GG	GG	GG	GG	GG	GG	GG	GG	GG	GG	GG	GG	GG	GG	GG	GG	GG	GG	GG	GG	GG	GG	GG
Gm06_2393421_A_G	Gm06	2420702	AA	AA	AA	AA	AA	AA	AA	AA	AA	AA	AA	AA	AA	AA	AA	AA	AA	AA	AA	AA	AA	AA	AA	AA	AA	AA	AA	AA	AA	AA	AA	AA	AA	AA	AA	AA	AA	AA	AA	AA	AA	AA	AA	AA	AA	AA	AA
Gm06_2596995_A_G	Gm06	2624221	AA	AA	AA	AA	AA	AA	AA	AA	AA	AA	AA	AA	AA	AA	AA	AA	AA	AA	AA	AA	AA	AA	AA	AA	AA	AA	AA	AA	AA	AA	AA	AA	AA	AA	AA	AA	AA	AA	AA	AA	AA	AA	AA	AA	AA	AA	AA
Gm06_3143746_T_C	Gm06	3170761	--	TT	--	TT	TT	CC	CC	CC	CC	TC	TT	CC	TT	CC	CC	TT	CC	TT	CC	TT	CC	CC	CC	CC	CC	CC	TC	CC	TC	TT	TT	CC	CC	TT	CC	TT	TT	TT	--	CC	CC	CC	CC	--	CC	TT	TT
Gm06_3335673_A_G	Gm06	3362688	AG	--	GG	--	AA	GG	GG	GG	GG	--	AA	GG	AA	GG	GG	AA	GG	AA	GG	AA	GG	GG	GG	GG	GG	GG	--	GG	GG	AA	AA	GG	GG	AA	GG	AA	AA	AA	AG	GG	GG	GG	GG	GG	GG	AA	AA
Gm06_3370143_T_C	Gm06	3397159	TT	TT	CC	TT	TT	CC	CC	CC	CC	--	TT	CC	TT	CC	CC	TT	CC	TT	CC	TT	CC	CC	CC	CC	CC	CC	TC	CC	--	TT	TT	CC	CC	TT	CC	TT	TT	TT	TT	CC	CC	CC	CC	--	CC	TT	TT
Gm06_3608127_T_C	Gm06	3643449	--	TT	CC	TT	TT	CC	CC	CC	CC	--	TT	CC	TT	CC	CC	TT	CC	TT	CC	TT	CC	CC	CC	CC	CC	CC	--	CC	CC	TT	TT	CC	CC	TT	CC	TT	TT	TT	TC	CC	CC	CC	CC	CC	CC	TT	TT
Gm06_3941524_A_G	Gm06	3975042	GG	GG	GG	GG	GG	GG	GG	GG	GG	GG	GG	GG	GG	GG	GG	GG	GG	GG	GG	GG	GG	GG	GG	GG	GG	GG	GG	GG	GG	GG	GG	GG	GG	GG	GG	GG	GG	GG	GG	GG	GG	GG	GG	GG	GG	GG	GG
Gm06_4212222_A_G	Gm06	4245837	GG	AA	GG	GG	AA	GG	GG	GG	GG	GG	GG	GG	AA	GG	GG	AA	AA	AA	GG	AA	GG	GG	GG	GG	AA	GG	AG	GG	GG	GG	GG	GG	GG	GG	GG	AA	GG	GG	GG	GG	GG	GG	GG	GG	GG	GG	GG
Gm06_4302100_C_T	Gm06	4335715	TT	--	TT	TT	CC	TT	TT	TT	TT	TT	TT	TT	CC	TT	TT	TC	CC	--	TT	CC	TT	TT	TT	TT	CC	TT	--	TT	--	TT	--	TT	TT	TT	TT	CC	TT	TT	TT	TT	--	TT	TT	--	TT	TT	TT
Gm06_4422517_A_G	Gm06	4456132	AA	AA	AA	AA	AA	AA	AA	AA	AA	AA	AA	AA	AA	AA	AA	AA	AA	AA	AA	AA	AA	AA	AA	AA	AA	AA	AA	AA	AA	AA	AA	AA	AA	AA	AA	AA	AA	AA	AA	AA	AA	AA	AA	AA	AA	AA	AA
Gm06_4820133_A_G	Gm06	4826081	GG	GG	GG	--	AA	GG	GG	GG	GG	--	GG	GG	AA	GG	GG	AA	AA	AA	GG	AA	GG	AA	GG	GG	AA	GG	AA	GG	AG	GG	AG	GG	GG	GG	GG	--	GG	GG	AG	GG	AG	GG	--	AG	GG	GG	GG
Gm06_4935060_G_A	Gm06	4941014	--	AA	AA	AG	GG	AA	AA	AA	AA	AG	AA	AA	GG	AA	--	GG	GG	GG	AA	GG	--	GG	AA	AA	GG	AA	GG	--	AG	AA	AG	AA	AA	AA	AA	GG	AA	AA	AG	--	--	--	AG	AG	--	AA	--
Gm06_4995087_A_G	Gm06	5001043	GG	GG	GG	GG	AA	GG	GG	GG	GG	GG	GG	GG	AA	GG	GG	AA	AA	AA	GG	AA	GG	AA	GG	GG	AA	GG	AA	GG	GG	GG	GG	GG	GG	GG	GG	--	GG	GG	GG	GG	GG	GG	GG	GG	GG	GG	GG
Gm06_5058345_A_G	Gm06	5064301	GG	GG	GG	GG	GG	GG	GG	GG	GG	GG	GG	GG	GG	GG	GG	GG	GG	GG	GG	GG	GG	GG	GG	GG	GG	GG	GG	GG	GG	GG	GG	GG	GG	GG	GG	GG	GG	GG	GG	GG	GG	GG	GG	GG	GG	GG	GG
Gm06_5135025_A_G	Gm06	5140936	AA	AA	AA	--	GG	AA	AA	AA	AA	AA	AA	AA	GG	AA	AA	GG	GG	GG	AA	GG	AA	GG	AA	AA	GG	AA	GG	AA	AG	AA	AA	AA	AA	AA	AA	AG	AA	AA	AG	AA	AG	AA	--	AG	AA	AA	AA
Gm06_5196308_T_C	Gm06	5202219	TT	TT	TT	TT	CC	TT	TT	TT	TT	TT	TT	TT	CC	TT	TT	--	CC	--	TT	CC	TT	--	TT	TT	CC	TT	CC	TT	--	TT	TT	TT	TT	TT	TT	TC	TT	TT	TC	TT	--	TT	TT	--	TT	TT	TT
Gm06_5297183_G_A	Gm06	5303094	GG	GG	GG	GG	AA	GG	GG	GG	GG	GG	GG	GG	AA	GG	GG	--	AA	AA	GG	AA	GG	--	GG	GG	AA	GG	AA	GG	--	GG	GG	GG	GG	GG	GG	--	GG	GG	--	GG	--	GG	GG	--	GG	GG	GG
Gm06_5318544_T_C	Gm06	5324457	TT	TT	TT	TT	CC	TT	TT	TT	TT	TT	TT	TT	CC	TT	TT	--	CC	--	TT	CC	TT	--	TT	TT	CC	TT	CC	TT	--	TT	TT	TT	TT	TT	TT	--	TT	TT	--	TT	--	TT	TT	--	TT	TT	TT
Gm06_5829396_G_A	Gm06	5835215	GG	GG	GG	GG	GG	GG	GG	GG	GG	GG	GG	GG	GG	GG	GG	GG	GG	GG	GG	GG	GG	GG	GG	GG	GG	GG	GG	GG	GG	GG	GG	GG	GG	GG	GG	GG	GG	GG	GG	GG	GG	GG	GG	GG	GG	GG	GG
Gm06_5847946_T_G	Gm06	5853765	TT	TT	TT	TT	TT	TT	TT	TT	TT	TT	TT	TT	TT	TT	TT	TT	TT	TT	TT	TT	TT	TT	TT	TT	TT	TT	TT	TT	TT	TT	TT	TT	TT	TT	TT	TT	TT	TT	TT	TT	TT	TT	TT	TT	TT	TT	TT
Gm06_6094090_G_T	Gm06	6099232	GG	GG	GG	GG	TT	GG	GG	GG	GG	GG	GG	GG	TT	TT	GG	TT	TT	TT	GG	TT	GG	TT	TG	GG	TT	GG	TT	GG	--	GG	GG	GG	GG	GG	GG	TG	GG	GG	--	GG	--	GG	GG	GG	GG	GG	GG
Gm06_6141525_A_C	Gm06	6146667	CC	CC	CC	CC	AA	CC	CC	CC	CC	CC	CC	CC	AA	AA	CC	AA	AA	AA	CC	AA	CC	AA	AC	CC	AA	CC	AA	CC	CC	CC	CC	CC	CC	CC	CC	AC	CC	CC	--	CC	CC	CC	CC	CC	CC	CC	CC
Gm06_6488212_A_C	Gm06	6493434	CC	CC	CC	CC	AA	CC	CC	CC	CC	CC	CC	CC	AA	AA	CC	--	AA	--	CC	AA	CC	--	--	CC	AA	CC	AA	CC	--	CC	CC	CC	CC	CC	CC	--	CC	CC	--	CC	CC	CC	CC	CC	CC	CC	CC
Gm06_6797764_C_T	Gm06	6803119	TT	TT	TT	TT	CC	TT	TT	TT	TT	TT	TT	TT	CC	CC	TT	CC	CC	CC	TT	CC	TT	CC	TC	TT	CC	TT	CC	TT	TC	TT	TT	TT	TT	TT	TT	TC	TT	TT	--	TT	--	CC	TT	TT	TT	TT	TT
Gm06_6914278_T_C	Gm06	6919668	CC	CC	CC	CC	TT	CC	CC	CC	CC	CC	CC	CC	TT	TT	CC	TT	TT	TT	CC	TT	CC	TT	--	CC	TT	CC	TT	CC	CC	CC	CC	CC	CC	CC	CC	TC	CC	CC	CC	CC	CC	TT	CC	CC	CC	CC	CC
Gm06_7072768_A_G	Gm06	7078527	GG	GG	GG	GG	GG	GG	GG	GG	GG	GG	GG	GG	GG	GG	GG	GG	GG	GG	GG	GG	GG	GG	GG	GG	GG	GG	GG	GG	GG	GG	GG	GG	GG	GG	GG	GG	GG	GG	GG	GG	GG	GG	GG	GG	GG	GG	GG
Gm06_7259462_T_C	Gm06	7265304	TT	TT	TT	TT	CC	TT	TT	TT	TT	TT	TT	TT	CC	CC	TT	TT	CC	CC	TT	CC	TT	CC	--	TT	CC	TT	CC	TT	CC	TT	TT	TT	TT	TT	TT	TC	TT	TT	TT	TT	TT	CC	TT	TT	TT	TT	TT
Gm06_7683418_G_A	Gm06	7689180	AA	AA	AA	AA	AA	AA	AA	AA	AA	AA	AA	AA	AA	AA	AA	AA	AA	AA	AA	AA	AA	AA	AA	AA	AA	AA	AA	AA	AA	AA	AA	AA	AA	AA	AA	AA	AA	AA	AA	AA	AA	AA	AA	AA	AA	AA	AA
Gm06_7918219_C_T	Gm06	7923990	CC	CC	CC	CC	TT	CC	CC	CC	TT	CC	CC	CC	TT	TT	CC	CC	TT	TT	CC	CC	CC	TT	--	CC	TT	CC	TT	CC	TT	CC	CC	CC	TT	CC	CC	TC	CC	CC	--	CC	--	--	CC	CC	CC	CC	CC
Gm06_8015415_G_T	Gm06	8021182	GG	GG	GG	GG	TT	--	GG	GG	TT	--	GG	GG	TT	TT	GG	GG	TT	TT	GG	GG	GG	TT	TG	GG	TT	GG	TT	GG	TT	GG	GG	GG	TT	GG	GG	--	GG	GG	TG	GG	TG	TT	TG	GG	GG	GG	GG
Gm06_8079300_T_C	Gm06	8085085	CC	CC	CC	CC	TT	CC	CC	CC	TT	CC	CC	CC	TT	TT	CC	CC	TT	TT	CC	CC	CC	TT	--	CC	TT	CC	TT	CC	TT	CC	CC	CC	TT	CC	CC	TC	CC	CC	--	CC	--	--	CC	CC	CC	CC	CC
Gm06_8338093_G_A	Gm06	8343876	AA	AA	AA	AA	GG	AA	AA	AA	GG	AA	AA	AA	GG	GG	AA	AA	GG	GG	AA	AA	AA	GG	AG	AA	GG	AA	GG	AA	GG	AA	--	AA	GG	AA	AA	AG	AA	AA	--	AA	--	GG	AA	--	AA	AA	AA
Gm06_8483050_C_T	Gm06	8488833	CC	CC	CC	CC	CC	CC	CC	CC	CC	CC	CC	CC	CC	CC	CC	CC	CC	CC	CC	CC	CC	CC	CC	CC	CC	CC	CC	CC	CC	CC	CC	CC	CC	CC	CC	CC	CC	CC	CC	CC	CC	CC	CC	CC	CC	CC	CC
Gm06_8979504_A_G	Gm06	8985500	AA	AA	AA	AA	GG	AA	AA	AA	AA	AA	AA	AA	GG	GG	AA	GG	GG	GG	AA	AA	AA	GG	AG	AA	GG	AA	GG	AA	GG	AA	AA	AA	AA	AA	AA	GG	AA	AA	--	AA	--	GG	AA	--	AA	AA	AA
Gm06_9081030_C_A	Gm06	9087027	CC	CC	CC	CC	CC	CC	CC	CC	CC	CC	CC	CC	CC	CC	CC	CC	CC	CC	CC	CC	CC	CC	CC	CC	CC	CC	CC	CC	CC	CC	CC	CC	CC	CC	CC	CC	CC	CC	CC	CC	CC	CC	CC	CC	CC	CC	CC
Gm06_9216536_A_C	Gm06	9227148	AA	AA	AA	AA	AA	AA	AA	AA	AA	AA	AA	AA	AA	AA	AA	AA	AA	AA	AA	AA	AA	AA	AA	AA	AA	AA	AA	AA	AA	AA	AA	AA	AA	AA	AA	AA	AA	AA	AA	AA	AA	AA	AA	AA	AA	AA	AA
Gm06_9263869_A_C	Gm06	9274481	AA	AA	AA	AA	CC	AA	AA	AA	AA	AA	AA	AA	CC	CC	AA	CC	CC	AA	AA	AA	AA	CC	AC	AA	CC	CC	CC	AA	CC	AA	AA	AA	AA	AA	AA	CC	AA	AA	AC	AA	CC	CC	AA	--	AA	AA	AA
Gm06_9442481_T_C	Gm06	9453068	TT	TT	TT	TT	CC	TT	TT	TT	TT	TT	TT	TT	CC	CC	TT	CC	CC	TT	TT	TT	TT	CC	TT	TT	CC	--	CC	TT	CC	TT	TT	TT	TT	TT	TT	CC	TT	TT	TT	TT	CC	CC	TT	TC	TT	TT	TT
Gm06_9668798_T_C	Gm06	9679385	TT	TT	TT	TT	CC	TT	TT	TT	TT	TT	TT	TT	CC	CC	TT	CC	CC	TT	TT	TT	TT	CC	TC	TT	CC	CC	CC	TT	CC	TT	TT	TT	TT	TT	TT	CC	TT	TT	TC	TT	CC	CC	TT	--	TT	TT	TT
Gm06_9803356_C_T	Gm06	9813969	CC	CC	CC	CC	CC	CC	CC	CC	CC	CC	CC	CC	CC	CC	CC	CC	CC	CC	CC	CC	CC	CC	CC	CC	CC	CC	CC	CC	CC	CC	CC	CC	CC	CC	CC	CC	CC	CC	CC	CC	CC	CC	CC	CC	CC	CC	CC
Gm06_10124470_T_C	Gm06	10143832	TT	TT	TT	TT	CC	TT	TT	TT	TT	TT	TT	TT	CC	CC	TT	CC	CC	TT	TT	TT	TT	CC	TC	TT	CC	CC	CC	TT	CC	TT	TT	TT	TT	TT	TT	CC	TT	TT	TC	TT	CC	CC	TT	--	TT	TT	TT
Gm06_10240897_T_C	Gm06	10260260	TT	TT	TT	TT	CC	TT	TT	TT	TT	TT	TT	TT	CC	CC	TT	CC	CC	TT	TT	TT	TT	CC	TC	TT	CC	--	CC	TT	CC	TT	TT	TT	TT	TT	TT	CC	TT	TT	TC	TT	CC	CC	TT	--	TT	TT	TT
Gm06_10324739_T_G	Gm06	10344093	TT	TT	TT	TT	GG	TT	TT	TT	TT	TT	TT	TT	GG	GG	TT	GG	GG	TT	TT	TT	TT	GG	TT	TT	GG	GG	GG	TT	GG	TT	TT	TT	TT	TT	TT	GG	TT	TT	TT	TT	GG	GG	TT	--	TT	TT	TT
Gm06_10383065_G_A	Gm06	10402418	GG	GG	GG	GG	AA	GG	GG	GG	GG	GG	GG	GG	AA	AA	GG	AA	AA	GG	GG	GG	GG	AA	GG	GG	AA	AA	AA	GG	AA	GG	GG	GG	GG	GG	GG	AA	GG	GG	GG	GG	AA	AA	GG	--	GG	GG	GG
Gm06_10464340_G_A	Gm06	10483693	GG	GG	GG	GG	AA	GG	GG	GG	GG	--	GG	GG	AA	AA	GG	--	AA	GG	GG	GG	GG	AA	--	GG	AA	--	AA	GG	--	GG	GG	GG	GG	GG	GG	AA	GG	GG	--	GG	AA	--	GG	AG	GG	GG	GG
Gm06_10693310_G_A	Gm06	10712690	GG	GG	GG	GG	AA	GG	GG	GG	GG	GG	GG	GG	AA	AA	GG	AA	GG	GG	GG	GG	GG	AA	AG	GG	AA	AA	AA	GG	AA	GG	GG	GG	GG	GG	GG	AA	GG	GG	AG	GG	AA	AA	GG	--	GG	GG	GG
Gm06_10781518_T_C	Gm06	10809898	TT	TT	TT	TT	TT	TT	TT	TT	TT	TT	TT	TT	TT	TT	TT	TT	TT	TT	TT	TT	TT	TT	TT	TT	TT	TT	TT	TT	TT	TT	TT	TT	TT	TT	TT	TT	TT	TT	TT	TT	TT	TT	TT	TT	TT	TT	TT
Gm06_10891060_T_C	Gm06	10919443	CC	CC	CC	CC	--	CC	CC	CC	CC	--	CC	CC	--	TC	CC	TC	CC	CC	CC	CC	CC	TC	CC	CC	TC	TC	TT	CC	TC	CC	CC	CC	CC	CC	CC	--	CC	CC	CC	CC	TT	TC	CC	--	CC	CC	CC
Gm06_11098210_C_T	Gm06	11124796	TT	TT	TT	TT	CC	TT	TT	TT	TT	TT	TT	TT	CC	CC	TT	--	TT	TT	TT	TT	TT	CC	--	TT	CC	--	CC	TT	CC	TT	TT	TT	TT	TT	TT	CC	CC	TT	--	TT	CC	--	TT	TC	TT	CC	TT
Gm06_11165149_C_T	Gm06	11191735	CC	CC	CC	CC	TT	CC	CC	CC	CC	CC	CC	CC	TT	TT	CC	TT	CC	CC	CC	CC	CC	TT	CC	CC	TT	CC	TT	CC	TT	CC	CC	CC	CC	CC	CC	TT	TT	CC	CC	CC	TT	TT	CC	--	CC	TT	CC
Gm06_11333769_G_A	Gm06	11360371	GG	GG	GG	GG	AA	GG	GG	GG	GG	GG	GG	GG	AA	AA	GG	--	GG	GG	GG	GG	GG	AA	--	GG	AA	GG	AA	GG	AA	GG	GG	GG	GG	GG	GG	AA	AA	GG	--	GG	AA	--	GG	AG	GG	AA	GG
Gm06_11479872_T_C	Gm06	11506438	TT	TT	TT	TT	CC	TT	TT	TT	TT	TT	TT	TT	CC	CC	TT	CC	TT	TT	TT	TT	TT	CC	TC	TT	CC	TT	CC	TT	CC	TT	TT	TT	TT	TT	TT	CC	CC	TT	TC	TT	CC	CC	TT	--	TT	CC	TT
Gm06_11844498_A_G	Gm06	11871084	AA	AA	AA	AA	GG	AA	AA	AA	AA	AA	AA	AA	GG	GG	AA	GG	AA	AA	AA	AA	AA	GG	AA	AA	GG	AA	GG	AA	GG	AA	AA	AA	AA	AA	AA	GG	GG	AA	AA	GG	GG	GG	AA	--	AA	GG	AA
Gm06_12816666_A_G	Gm06	12843589	AA	AA	AA	AA	AA	AA	AA	AA	AA	AA	AA	AA	AA	AA	AA	AA	AA	AA	AA	AA	AA	AA	AA	AA	AA	AA	AA	AA	AA	AA	AA	AA	AA	AA	AA	AA	AA	AA	AA	AA	AA	AA	AA	AA	AA	AA	AA
Gm06_12963850_T_C	Gm06	12990773	TT	TT	TT	TT	CC	TT	TT	TT	TT	TT	TT	TT	CC	CC	TT	--	TT	TC	TT	TT	TT	CC	TC	TT	TT	TT	CC	TT	CC	TT	TT	TT	TT	TT	TT	CC	CC	TT	--	CC	CC	CC	TT	--	TT	CC	TT
Gm06_13237698_A_G	Gm06	13264621	AA	AA	AA	AA	AA	AA	AA	AA	AA	AA	AA	AA	AA	AA	AA	AA	AA	AA	AA	AA	AA	AA	AA	AA	AA	AA	AA	AA	AA	AA	AA	AA	AA	AA	AA	AA	AA	AA	AA	AA	AA	AA	AA	AA	AA	AA	AA
Gm06_13318948_A_G	Gm06	13345871	GG	GG	GG	GG	AA	--	GG	GG	GG	GG	GG	GG	AA	AA	GG	--	GG	--	GG	GG	GG	AA	AG	GG	GG	GG	AA	GG	AA	GG	GG	GG	GG	GG	GG	AA	AA	GG	AG	AA	AA	AA	GG	AG	GG	AA	GG
Gm06_13401987_C_T	Gm06	13429255	CC	CC	CC	CC	TT	CC	CC	CC	CC	CC	CC	CC	TT	TT	CC	TC	CC	--	CC	CC	CC	TT	CC	CC	CC	CC	TT	CC	TT	CC	CC	CC	CC	CC	CC	--	TT	CC	CC	TT	TT	TT	CC	CC	CC	TT	CC
Gm06_13528200_T_C	Gm06	13555487	CC	CC	CC	CC	CC	CC	CC	CC	CC	CC	CC	CC	CC	CC	CC	CC	CC	CC	CC	CC	CC	CC	CC	CC	CC	CC	CC	CC	CC	CC	CC	CC	CC	CC	CC	CC	CC	CC	CC	CC	CC	CC	CC	CC	CC	CC	CC
Gm06_13621986_A_C	Gm06	13649273	CC	CC	CC	CC	CC	CC	CC	CC	CC	CC	CC	CC	CC	CC	CC	CC	CC	CC	CC	CC	CC	CC	CC	CC	CC	CC	CC	CC	CC	CC	CC	CC	CC	CC	CC	CC	CC	CC	CC	CC	CC	CC	CC	CC	CC	CC	CC
Gm06_13811298_C_T	Gm06	13847595	TT	TT	TT	TT	TT	TT	TT	TT	TT	TT	TT	TT	TT	TT	TT	TT	TT	TT	TT	TT	TT	TT	TT	TT	TT	TT	TT	TT	TT	TT	TT	TT	TT	TT	TT	TT	TT	TT	TT	TT	TT	TT	TT	TT	TT	TT	TT
Gm06_13881657_A_G	Gm06	13917815	AA	AA	AA	AA	AA	AA	AA	AA	AA	AA	AA	AA	AA	AA	AA	AA	AA	AA	AA	AA	AA	AA	AA	AA	AA	AA	AA	AA	AA	AA	AA	AA	AA	AA	AA	AA	AA	AA	AA	AA	AA	AA	AA	AA	AA	AA	AA
Gm06_14058543_A_C	Gm06	14094641	CC	AA	CC	CC	AA	CC	CC	CC	CC	CC	CC	CC	AA	AA	CC	AA	CC	--	CC	CC	CC	AA	AC	CC	CC	CC	AA	CC	AA	CC	CC	CC	CC	CC	CC	AA	AA	CC	--	AA	AA	AA	CC	AC	CC	AA	CC
Gm06_14452528_G_A	Gm06	14495135	GG	GG	GG	GG	GG	GG	GG	GG	GG	GG	GG	GG	GG	GG	GG	GG	GG	GG	GG	GG	GG	GG	GG	GG	GG	GG	GG	GG	GG	GG	GG	GG	GG	GG	GG	GG	GG	GG	GG	GG	GG	GG	GG	GG	GG	GG	GG
Gm06_14511744_T_C	Gm06	14554440	--	--	--	--	--	--	--	--	--	--	--	TT	--	--	--	--	--	--	--	--	--	--	--	--	--	--	--	--	--	--	--	--	--	--	--	--	--	--	--	--	--	--	--	--	--	--	--
Gm06_14737902_A_G	Gm06	14780835	AA	AA	AA	AA	AA	AA	AA	AA	AA	AA	AA	AA	AA	AA	AA	AA	AA	AA	AA	AA	AA	AA	AA	AA	AA	AA	AA	AA	AA	AA	AA	AA	AA	AA	AA	AA	AA	AA	AA	AA	AA	AA	AA	AA	AA	AA	AA
Gm06_14859364_A_C	Gm06	14901930	AA	AA	AA	AA	AA	AA	AA	AA	AA	AA	AA	AA	AA	AA	AA	AA	AA	AA	AA	AA	AA	AA	AA	AA	AA	AA	AA	AA	AA	AA	AA	AA	AA	AA	AA	AA	AA	AA	AA	AA	AA	AA	AA	AA	AA	AA	AA
Gm06_14924961_T_C	Gm06	14967527	TT	TT	TT	TT	TT	TT	TT	TT	TT	TT	TT	TT	TT	TT	TT	TT	TT	TT	TT	TT	TT	TT	TT	TT	TT	TT	TT	TT	TT	TT	TT	TT	TT	TT	TT	TT	TT	TT	TT	TT	TT	TT	TT	TT	TT	TT	TT
Gm06_15032691_A_G	Gm06	15074859	AA	AA	AA	AA	AA	AA	AA	AA	AA	AA	AA	AA	AA	AA	AA	AA	AA	AA	AA	AA	AA	AA	AA	AA	AA	AA	AA	AA	AA	AA	AA	AA	AA	AA	AA	AA	AA	AA	AA	AA	AA	AA	AA	AA	AA	AA	AA
Gm06_15115808_C_T	Gm06	15157976	CC	CC	CC	CC	CC	CC	CC	CC	CC	CC	CC	CC	CC	CC	CC	CC	CC	CC	CC	CC	CC	CC	CC	CC	CC	CC	CC	CC	CC	CC	CC	CC	CC	CC	CC	CC	CC	CC	CC	CC	CC	CC	CC	CC	CC	CC	CC
Gm06_15376751_G_A	Gm06	15418909	GG	GG	GG	GG	GG	GG	GG	GG	GG	GG	GG	GG	GG	GG	GG	GG	GG	GG	GG	GG	GG	GG	AG	GG	GG	GG	GG	GG	GG	GG	GG	GG	GG	GG	GG	GG	GG	GG	GG	GG	GG	GG	GG	GG	GG	GG	GG
Gm06_15453344_A_G	Gm06	15495234	AA	AA	AA	AA	AA	AA	AA	AA	AA	AA	AA	AA	AA	AA	AA	AA	AA	AA	AA	AA	AA	AA	AA	AA	AA	AA	AA	AA	AA	AA	AA	AA	AA	AA	AA	AA	AA	AA	AA	AA	AA	AA	AA	AA	AA	AA	AA
Gm06_15571070_T_C	Gm06	15614187	TT	TT	TT	TT	TT	TT	TT	TT	TT	TT	TT	TT	TT	TT	TT	TT	TT	TT	TT	TT	TT	TT	TT	TT	TT	TT	TT	TT	TT	TT	TT	TT	TT	TT	TT	TT	TT	TT	TT	TT	TT	TT	TT	TT	TT	TT	TT
Gm06_16084283_C_T	Gm06	16133204	CC	CC	CC	CC	CC	CC	CC	CC	CC	CC	CC	CC	CC	CC	CC	CC	CC	CC	CC	CC	CC	CC	CC	CC	CC	CC	CC	CC	CC	CC	CC	CC	CC	CC	CC	CC	CC	CC	CC	CC	CC	CC	CC	CC	CC	CC	CC
Gm06_16133328_G_A	Gm06	16182609	GG	GG	GG	GG	GG	GG	GG	GG	GG	GG	GG	GG	GG	GG	GG	GG	GG	GG	GG	GG	GG	GG	GG	GG	GG	GG	GG	GG	GG	GG	GG	GG	GG	GG	GG	GG	GG	GG	GG	GG	GG	GG	GG	GG	GG	GG	GG
Gm06_16315206_A_G	Gm06	16365309	AA	AA	AA	AA	AA	AA	AA	AA	AA	AA	AA	AA	AA	AA	AA	AA	AA	AA	AA	AA	AA	AA	AA	AA	AA	AA	AA	AA	AA	AA	AA	AA	AA	AA	AA	AA	AA	AA	AA	AA	AA	AA	AA	AA	AA	AA	AA
Gm06_16372276_T_C	Gm06	16423204	TT	TT	TT	TT	TT	TT	TT	TT	TT	TT	TT	TT	TT	TT	TT	TT	TT	TT	TT	TT	TT	TT	TT	TT	TT	TT	TT	TT	TT	TT	TT	TT	TT	TT	TT	TT	TT	TT	TT	TT	TT	TT	TT	TT	TT	TT	TT
Gm06_16669594_G_T	Gm06	16714933	TT	GG	TT	GG	GG	TT	TT	TT	TT	--	GG	TT	TT	GG	GG	GG	TT	TT	TT	GG	TT	TT	TG	TT	TT	TT	GG	TT	TG	TT	TT	TT	TT	TT	TT	GG	GG	--	TT	GG	TT	GG	TT	TT	TT	GG	--
Gm06_17188046_A_G	Gm06	17232870	AA	AA	AA	AA	AA	AA	AA	AA	AA	AA	AA	AA	AA	AA	AA	AA	AA	AA	AG	AA	AA	GG	AA	AA	AA	AA	AA	AA	AA	AA	AA	AA	AA	AA	AA	AA	AA	AA	AA	AA	AA	AA	AA	AA	AA	AA	AA
Gm06_17399306_A_C	Gm06	17453976	CC	CC	CC	CC	CC	CC	CC	CC	CC	CC	CC	CC	CC	CC	CC	CC	CC	CC	CC	CC	CC	CC	CC	CC	CC	CC	CC	CC	CC	CC	CC	CC	CC	CC	CC	CC	CC	CC	CC	CC	CC	CC	CC	CC	CC	CC	CC
Gm06_17617727_G_T	Gm06	17672411	TT	TT	TT	TT	TT	TT	TT	TT	TT	TT	TT	TT	TT	TT	TT	TT	TT	TT	TT	TT	TT	TT	TT	TT	TT	TT	TT	TT	TT	TT	TT	TT	TT	TT	TT	TT	TT	TT	TT	TT	TT	TT	TT	TT	TT	TT	TT
Gm06_18447419_G_A	Gm06	18641000	GG	GG	GG	GG	GG	GG	GG	GG	GG	GG	GG	GG	GG	GG	GG	GG	GG	GG	GG	GG	GG	GG	GG	GG	GG	GG	GG	GG	GG	GG	GG	GG	GG	GG	GG	GG	GG	GG	GG	GG	GG	GG	GG	GG	GG	GG	GG
Gm06_23462870_C_T	Gm06	23423070	TT	TT	CC	TT	TT	CC	TT	CC	TT	TT	TT	CC	CC	CC	TT	TT	CC	CC	CC	TT	CC	TT	--	CC	TT	TT	TT	CC	CC	CC	TT	CC	TT	CC	CC	TT	TT	TT	TT	TT	TT	TT	TT	TT	TT	TT	TT
Gm06_25704938_T_C	Gm06	24723754	CC	CC	TT	CC	CC	--	CC	TT	CC	CC	CC	TT	TT	TT	CC	CC	TT	TT	TT	CC	TT	CC	TC	TT	CC	CC	CC	TT	TT	TT	CC	TT	CC	TT	TT	CC	CC	CC	CC	CC	CC	CC	CC	CC	CC	CC	CC
Gm06_24160775_C_T	Gm06	26848852	TT	TT	CC	TT	TT	CC	TT	CC	TT	TT	TT	CC	CC	CC	TT	TT	CC	CC	CC	TT	CC	TT	CC	CC	TT	TT	TT	CC	CC	CC	TT	CC	TT	CC	CC	TT	TT	TT	TT	TT	TT	TT	TT	TT	TT	TT	TT
Gm06_28315232_G_A	Gm06	29185593	AG	--	GG	AA	AA	GG	AA	GG	AA	AA	AG	GG	GG	GG	AA	AA	GG	GG	GG	AA	GG	AA	--	GG	AA	AA	AA	GG	GG	GG	AA	GG	AA	GG	GG	AA	AA	AA	AA	AA	AA	AA	AA	--	AA	AA	AA
Gm06_28816949_A_G	Gm06	29695318	AA	AA	GG	AA	AA	GG	AA	GG	AA	AA	AA	GG	GG	GG	AA	AA	GG	GG	GG	AA	GG	AA	GG	GG	AA	AA	AA	GG	GG	GG	AA	GG	AA	GG	GG	AA	AA	AA	AA	AA	AA	AA	AA	AA	AA	AA	AA
Gm06_30260912_A_G	Gm06	31085380	GG	GG	AA	GG	GG	AA	GG	AA	GG	GG	GG	AA	AA	AA	GG	GG	AA	AA	AA	GG	AA	GG	AA	AA	GG	GG	GG	AA	AA	AA	GG	AA	GG	AA	AA	GG	GG	GG	GG	GG	GG	GG	GG	GG	GG	GG	GG
Gm06_32525220_G_T	Gm06	33455115	TT	TT	GG	TT	TT	GG	TT	GG	TT	TT	TT	GG	GG	GG	TT	TT	GG	GG	GG	TT	GG	TT	GG	GG	TT	TT	TT	GG	GG	GG	TT	GG	TT	GG	GG	TT	TT	TT	TT	TT	TT	TT	TT	TT	TT	TT	TT
Gm06_33615663_G_A	Gm06	34540898	AG	AA	GG	AA	AA	GG	AA	GG	AA	AA	--	GG	GG	GG	AA	AA	GG	GG	GG	AA	GG	AA	GG	GG	AA	AA	AA	GG	GG	GG	AA	GG	AA	GG	GG	AA	AA	AA	AA	AA	AA	AA	AA	--	AA	AA	AA
Gm06_34966793_A_G	Gm06	35886438	--	AA	AG	AA	AA	AG	AA	GG	AA	AA	AA	GG	GG	GG	AA	AA	GG	AG	AG	AA	GG	AA	--	GG	AA	AA	AA	GG	GG	GG	AA	GG	AA	GG	GG	AA	AA	AA	AA	AA	AA	AA	AA	AA	AA	AA	AA
Gm06_37364558_A_C	Gm06	38073750	AA	AA	AC	AA	AA	AC	AA	CC	AA	AA	AA	CC	CC	CC	AA	AA	CC	--	--	AA	CC	AA	--	CC	AA	AA	AA	CC	CC	CC	AA	CC	AA	CC	CC	AA	AA	AA	AA	AA	AA	AA	AA	AA	AA	AA	AA
Gm06_37485859_A_G	Gm06	38195052	AA	AA	AG	AA	AA	AG	AA	GG	AA	AA	AA	GG	GG	GG	AA	AA	GG	AG	AG	AA	GG	AA	--	GG	AA	AA	AA	GG	GG	GG	AA	GG	AA	GG	GG	AA	AA	AA	AA	AA	AA	AA	AA	AA	AA	AA	AA
Gm06_37732009_A_G	Gm06	38435794	AA	AA	GG	AA	AA	GG	AA	GG	AA	AA	AA	GG	GG	GG	AA	AA	GG	GG	GG	AA	GG	AA	--	GG	AA	AA	AA	GG	GG	GG	AA	GG	AA	GG	GG	AA	AA	AA	AA	AA	AA	AA	AA	AA	AA	AA	AA
Gm06_37823440_T_C	Gm06	38527444	CC	CC	--	CC	CC	--	CC	TC	CC	CC	CC	TT	TC	TC	CC	CC	TC	TC	TC	CC	TC	CC	--	TC	CC	CC	CC	TC	TC	TC	CC	TC	CC	TC	TC	CC	CC	CC	CC	CC	CC	CC	CC	CC	CC	CC	CC
Gm06_38232188_C_A	Gm06	38920680	--	CC	AC	CC	CC	AC	CC	AA	CC	CC	CC	AA	AA	AA	CC	CC	AA	AC	AC	CC	AA	CC	--	AA	CC	CC	CC	AA	AA	AA	CC	AA	CC	AA	AA	CC	CC	CC	CC	CC	CC	CC	CC	CC	CC	CC	CC
Gm06_38499465_G_A	Gm06	39188086	GG	GG	AG	GG	GG	AG	GG	AA	GG	GG	GG	AA	AA	AA	GG	GG	AA	AG	AG	GG	AA	GG	--	AA	GG	GG	GG	AA	AA	AA	GG	AA	GG	AA	AA	GG	GG	GG	GG	GG	GG	GG	GG	GG	GG	GG	GG
Gm06_37017961_A_G	Gm06	39294410	AG	--	GG	AA	AA	GG	AA	GG	AA	AA	--	GG	GG	GG	AA	AA	GG	GG	GG	AA	GG	AA	--	GG	AA	AA	AA	GG	GG	GG	AA	GG	AA	GG	GG	AA	AA	AA	AA	AA	AA	AA	AA	--	AA	AA	AA
Gm06_38703918_T_C	Gm06	39399409	TC	TT	CC	TT	TT	CC	TT	CC	TT	TT	--	CC	CC	CC	TT	TT	CC	CC	CC	TT	CC	TT	--	CC	TT	TT	TT	CC	CC	CC	TT	CC	TT	CC	CC	TT	TT	TT	TT	TT	TT	TT	TT	--	TT	TT	TT
Gm06_38999119_T_C	Gm06	39693731	TT	TT	CC	TT	TT	CC	TT	CC	TT	TT	TT	CC	CC	CC	TT	TT	CC	CC	CC	TT	CC	TT	CC	CC	TT	TT	TT	CC	CC	CC	TT	CC	TT	CC	CC	TT	TT	TT	TT	TT	TT	TT	TT	TT	TT	TT	TT
Gm06_40878788_C_T	Gm06	41585697	CC	CC	TT	CC	CC	TT	CC	TT	CC	CC	CC	--	TT	TT	CC	CC	TT	TT	TT	CC	TT	CC	TT	TT	CC	CC	CC	TT	TT	TT	CC	TT	CC	TT	TT	CC	CC	CC	CC	CC	CC	CC	CC	CC	CC	CC	CC
Gm06_41268682_G_T	Gm06	41974977	TG	--	TT	GG	GG	TT	GG	TT	GG	GG	--	TT	TT	TT	GG	GG	TT	TT	TT	GG	TT	GG	--	TT	GG	GG	GG	TT	TT	TT	GG	TT	GG	TT	TT	GG	GG	GG	GG	GG	GG	GG	GG	--	GG	GG	GG
Gm06_42515359_A_G	Gm06	43269264	AA	AA	GG	AA	AA	GG	AA	GG	AA	AA	AA	GG	GG	GG	AA	AA	GG	GG	GG	AA	GG	AA	GG	GG	AA	AA	AA	GG	GG	GG	AA	GG	AA	GG	GG	AA	AA	AA	AA	AA	AA	AA	AA	AA	AA	AA	AA
Gm06_42883965_T_C	Gm06	43644895	TT	TT	CC	TT	TT	CC	TT	CC	TT	TT	TT	CC	CC	CC	TT	TT	CC	CC	CC	TT	CC	TT	TT	CC	TT	TT	TT	CC	CC	TT	TT	CC	TT	CC	CC	TT	TT	TT	TT	TT	TT	TT	TT	TT	TT	TT	TT
Gm06_43235059_C_T	Gm06	43996760	TT	TT	CC	TT	TT	CC	TT	CC	TT	TT	TT	CC	CC	CC	TT	TT	CC	CC	CC	TT	CC	TT	TT	CC	TT	TT	TT	CC	CC	TT	TT	CC	TT	CC	CC	TT	TT	TT	TT	TT	TT	TT	TT	TT	TT	TT	TT
Gm06_43432590_G_A	Gm06	44190937	AA	AA	GG	AA	AA	GG	AA	GG	AA	AA	AA	GG	GG	GG	AA	AA	GG	GG	GG	AA	GG	AA	AA	GG	AA	AA	AA	GG	GG	AA	AA	GG	AA	GG	GG	AA	AA	AA	AA	AA	AA	AA	AA	AA	AA	AA	AA
Gm06_46321637_C_T	Gm06	46855442	CC	CC	CC	CC	CC	CC	CC	CC	CC	CC	CC	CC	CC	CC	CC	CC	CC	CC	CC	CC	CC	CC	CC	CC	CC	CC	CC	CC	CC	CC	CC	CC	CC	CC	CC	CC	CC	CC	CC	CC	CC	CC	CC	CC	CC	CC	CC
Gm06_46375359_G_A	Gm06	46907841	GG	GG	GG	GG	GG	GG	GG	GG	GG	GG	GG	GG	GG	GG	GG	GG	GG	GG	GG	GG	GG	GG	GG	GG	GG	GG	GG	GG	GG	GG	GG	GG	GG	GG	GG	GG	GG	GG	GG	GG	GG	GG	GG	GG	GG	GG	GG
Gm06_47026169_C_A	Gm06	47573235	CC	CC	CC	CC	CC	CC	CC	CC	CC	CC	CC	CC	CC	CC	CC	CC	CC	CC	CC	CC	CC	CC	CC	CC	CC	CC	CC	CC	CC	CC	CC	CC	CC	CC	CC	CC	CC	CC	CC	CC	CC	CC	CC	CC	CC	CC	CC
Gm06_47191346_C_T	Gm06	47722575	CC	CC	CC	CC	CC	CC	CC	CC	CC	CC	CC	CC	CC	CC	CC	CC	CC	CC	CC	CC	CC	CC	CC	CC	CC	CC	CC	CC	CC	CC	CC	CC	CC	CC	CC	CC	CC	CC	CC	CC	CC	CC	CC	CC	CC	CC	CC
Gm06_47238226_A_G	Gm06	47769455	AA	AA	AA	AA	AA	AA	AA	AA	AA	AA	AA	AA	AA	AA	AA	AA	AA	AA	AA	AA	AA	AA	AA	AA	AA	AA	AA	AA	AA	AA	AA	AA	AA	AA	AA	AA	AA	AA	AA	AA	AA	AA	AA	AA	AA	AA	AA
Gm06_47338142_T_G	Gm06	47869389	TT	TT	TT	TT	TT	TT	TT	TT	TT	TT	TT	TT	TT	TT	TT	TT	TT	TT	TT	TT	TT	TT	TT	TT	TT	TT	TT	TT	TT	TT	TT	TT	TT	TT	TT	TT	TT	TT	TT	TT	TT	TT	TT	TT	TT	TT	TT
Gm06_47439414_C_T	Gm06	47970654	CC	CC	CC	CC	CC	CC	CC	CC	CC	CC	CC	CC	CC	CC	CC	CC	CC	CC	CC	CC	CC	CC	CC	CC	CC	CC	CC	CC	CC	CC	CC	CC	CC	CC	CC	CC	CC	CC	CC	CC	CC	CC	CC	CC	CC	CC	CC
Gm06_47550354_A_G	Gm06	48080474	AA	AA	AA	AA	AA	AA	AA	AA	AA	AA	AA	AA	AA	AA	AA	AA	AA	AA	AA	AA	AA	AA	AA	AA	AA	AA	AA	AA	AA	AA	AA	AA	AA	AA	AA	AA	AA	AA	AA	AA	AA	AA	AA	AA	AA	AA	AA
Gm06_48582951_G_A	Gm06	48211587	GG	GG	GG	GG	GG	GG	GG	GG	GG	GG	GG	GG	GG	GG	GG	GG	GG	GG	GG	GG	GG	GG	GG	GG	GG	GG	GG	GG	GG	GG	GG	GG	GG	GG	GG	GG	GG	GG	GG	GG	GG	GG	GG	GG	GG	GG	GG
Gm06_47631544_T_C	Gm06	48252623	TT	TT	TT	TT	TT	TT	TT	TT	TT	TT	TT	TT	TT	TT	TT	TT	TT	TT	TT	TT	TT	TT	TT	TT	TT	TT	TT	TT	TT	TT	TT	TT	TT	TT	TT	TT	TT	TT	TT	TT	TT	TT	TT	TT	TT	TT	TT
Gm06_47723155_T_C	Gm06	48344234	TT	TT	TT	TT	TT	TT	TT	TT	TT	TT	TT	TT	TT	TT	TT	TT	TT	TT	TT	TT	TT	TT	TT	TT	TT	TT	TT	TT	TT	TT	TC	TT	TT	TT	TT	TT	TT	TT	TT	TT	TT	TT	TT	TT	TT	TT	TT
Gm06_47764344_C_T	Gm06	48385426	CC	CC	CC	CC	CC	CC	CC	CC	CC	CC	CC	CC	CC	CC	CC	CC	CC	CC	CC	CC	CC	CC	CC	CC	CC	CC	CC	CC	CC	CC	CC	CC	CC	CC	CC	CC	CC	CC	CC	CC	CC	CC	CC	CC	CC	CC	CC
Gm06_48261084_C_A	Gm06	48875217	CC	CC	CC	CC	CC	CC	CC	CC	CC	CC	CC	CC	CC	CC	CC	CC	CC	CC	CC	CC	CC	CC	CC	CC	CC	CC	CC	CC	CC	CC	CC	CC	CC	CC	CC	CC	CC	CC	CC	CC	CC	CC	CC	CC	CC	CC	CC
Gm06_48144110_G_A	Gm06	49235940	GG	GG	GG	GG	GG	GG	GG	GG	GG	GG	GG	GG	GG	GG	GG	GG	GG	GG	GG	GG	GG	GG	GG	GG	GG	GG	GG	GG	GG	GG	GG	GG	GG	GG	GG	GG	GG	GG	GG	GG	GG	GG	GG	GG	GG	GG	GG
Gm06_48988513_T_C	Gm06	49588829	TT	TT	TT	TT	TT	TT	TT	TT	TT	TT	TT	TT	TT	TT	TT	TT	TT	TT	TT	TT	TT	TT	TT	TT	TT	TT	TT	TT	TT	TT	--	TT	TT	TT	TT	TT	TT	TT	TT	TT	TT	TT	TT	TT	TT	TT	TT
Gm06_49106015_C_T	Gm06	49706309	CC	CC	CC	CC	CC	CC	CC	CC	CC	CC	CC	CC	CC	CC	CC	CC	CC	CC	CC	CC	CC	CC	CC	CC	CC	CC	CC	CC	CC	CC	--	CC	CC	CC	CC	CC	CC	CC	CC	CC	CC	CC	CC	CC	CC	CC	CC
Gm06_49209907_C_T	Gm06	49810204	CC	CC	CC	CC	CC	CC	CC	CC	CC	CC	CC	CC	CC	CC	CC	CC	CC	CC	CC	CC	CC	CC	CC	CC	CC	CC	CC	CC	CC	CC	CC	CC	CC	CC	CC	CC	CC	CC	CC	CC	CC	CC	CC	CC	CC	CC	CC
Gm06_49330690_G_T	Gm06	49931403	GG	GG	GG	GG	GG	GG	GG	GG	GG	GG	GG	GG	GG	GG	GG	GG	GG	GG	GG	GG	GG	GG	GG	GG	GG	GG	GG	GG	GG	GG	GG	GG	GG	GG	GG	GG	GG	GG	GG	GG	GG	GG	GG	GG	GG	GG	GG
Gm06_49570784_G_A	Gm06	50171806	AA	GG	AA	AA	AA	AA	AA	AA	GG	AA	AA	AA	AA	GG	GG	AG	AA	AA	GG	GG	GG	AA	GG	AA	AA	GG	AA	GG	AA	GG	AA	AA	GG	AA	--	GG	AA	AA	AA	AA	GG	AA	AA	AG	AA	AA	AA
Gm06_49643463_G_A	Gm06	50244483	GG	GG	GG	GG	GG	GG	GG	GG	GG	GG	GG	GG	GG	GG	GG	GG	GG	GG	GG	GG	GG	GG	GG	GG	GG	GG	GG	GG	GG	GG	AG	GG	GG	GG	GG	GG	GG	GG	GG	GG	GG	GG	GG	GG	GG	GG	GG
Gm06_49722118_A_G	Gm06	50323138	AA	AA	AA	AA	AA	AA	AA	AA	AA	AA	AA	AA	AA	AA	AA	AA	AA	AA	AA	AA	AA	AA	AA	AA	AA	AA	AA	AA	AA	AA	AA	AA	AA	AA	AA	AA	AA	AA	AA	AA	AA	AA	AA	AA	AA	AA	AA
Gm06_49915592_A_C	Gm06	50588869	CC	AA	CC	CC	CC	CC	CC	CC	AA	CC	CC	CC	CC	AA	AA	--	CC	CC	AA	AA	AA	--	AA	--	CC	AA	CC	AA	AA	AA	AC	CC	AA	CC	--	AA	CC	CC	CC	CC	AA	CC	CC	--	CC	CC	CC
Gm06_50038514_T_C	Gm06	50711282	TT	TT	TT	TT	TT	TT	TT	TT	TT	TT	TT	TT	TT	TT	TT	TT	TT	TT	TT	TT	TT	TT	TT	TT	TT	TT	TT	TT	TT	TT	TC	TT	TT	TT	TT	TT	TT	TT	TT	TT	TT	TT	TT	TT	TT	TT	TT
Gm06_50100354_G_T	Gm06	50773950	GG	GG	GG	GG	GG	GG	GG	GG	GG	GG	GG	GG	GG	GG	GG	GG	GG	GG	GG	GG	GG	GG	GG	GG	GG	GG	GG	GG	GG	GG	--	GG	GG	GG	GG	GG	GG	GG	GG	GG	GG	GG	GG	GG	GG	GG	GG
Gm10_6020959_G_T	Gm06	50788880	GG	GG	GG	GG	GG	GG	GG	GG	GG	GG	GG	GG	GG	GG	GG	GG	GG	GG	GG	GG	GG	GG	GG	GG	GG	GG	GG	GG	GG	GG	GG	GG	GG	GG	GG	GG	GG	GG	GG	GG	GG	GG	GG	GG	GG	GG	GG
Gm06_50143995_A_G	Gm06	50818472	GG	AA	GG	GG	AA	GG	GG	GG	AA	GG	GG	GG	GG	AA	AA	AA	GG	GG	AA	AA	AA	GG	AA	GG	GG	AA	GG	AA	AA	AA	GG	GG	AA	GG	AG	AA	GG	GG	GG	GG	AA	GG	GG	AA	GG	GG	GG
Gm06_50217611_T_C	Gm06	50892337	TT	TT	TT	TT	TT	TT	TT	TT	TT	TT	TT	TT	TT	TT	TT	TT	TT	TT	TT	TT	TT	TT	TT	TT	TT	TT	TT	TT	TT	TT	TC	TT	TT	TT	TT	TT	TT	TT	TT	TT	TT	TT	TT	TT	TT	TT	TT
Gm06_50261723_A_G	Gm06	50936449	AA	AA	AA	AA	AA	AA	AA	AA	AA	AA	AA	AA	AA	AA	AA	AA	AA	AA	AA	AA	AA	AA	AA	AA	AA	AA	AA	AA	AA	AA	AA	AA	AA	AA	AA	AA	AA	AA	AA	AA	AA	AA	AA	AA	AA	AA	AA
Gm06_50453859_A_G	Gm06	51128748	AA	AA	AA	AA	AA	AA	AA	AA	AA	AA	AA	AA	AA	AA	AA	AA	AA	AA	AA	AA	AA	AA	AA	AA	AA	AA	AA	AA	AA	AA	AA	AA	AA	AA	AA	AA	AA	AA	AA	AA	AA	AA	AA	AA	AA	AA	AA
Gm06_50494802_A_G	Gm06	51169689	AA	AA	AA	AA	AA	AA	AA	AA	AA	AA	AA	AA	AA	AA	AA	AA	AA	AA	AA	AA	AA	AA	AA	AA	AA	AA	AA	AA	AA	AA	AA	AA	AA	AA	AA	AA	AA	AA	AA	AA	AA	AA	AA	AA	AA	AA	AA
Gm07_527869_G_T	Gm07	532902	TG	GG	GG	GG	GG	TT	GG	TT	GG	TT	GG	TG	GG	TT	TT	TT	GG	GG	TT	TT	TT	--	TT	GG	TT	GG	GG	TG	TT	TT	GG	GG	TG	GG	TT	TT	GG	GG	GG	TT	GG	TT	GG	TT	GG	GG	TT
Gm07_1119462_A_G	Gm07	1121927	AA	AA	AA	AA	AA	AA	AA	AA	AA	AA	AA	AA	AA	AA	AA	AA	AA	AA	AA	AA	AA	AA	AA	AA	AA	AA	AA	AA	AA	AA	AG	AA	AA	AA	AA	AA	AA	AA	AA	AA	AA	AA	AA	AA	AA	AA	AA
Gm07_1246890_T_G	Gm07	1249059	--	--	GG	GG	GG	--	GG	--	GG	--	GG	TT	TT	TT	TT	TG	GG	GG	TT	TT	TT	TG	--	GG	TG	GG	GG	--	TG	TT	GG	GG	GG	GG	TT	TT	GG	GG	GG	TT	GG	TT	GG	TG	GG	GG	TT
Gm07_1382983_T_G	Gm07	1385153	TT	TT	TT	TT	TT	TT	TT	TT	TT	TT	TT	TT	TT	TT	TT	TT	TT	TT	TT	TT	TT	TT	TT	TT	TT	TT	TT	TT	TT	TT	--	TT	TT	TT	TT	TT	TT	TT	TT	TT	TT	TT	TT	TT	TT	TT	TT
Gm07_2512664_A_G	Gm07	2532517	AA	AA	AA	AA	AA	AA	AA	AA	AA	AA	AA	AA	AA	AA	AA	AA	AA	AA	AA	AA	AA	AA	AA	AA	AA	AA	AA	AA	AA	AA	AA	AA	AA	AA	AA	AA	AA	AA	AA	AA	AA	AA	AA	AA	AA	AA	AA
Gm07_2580303_T_G	Gm07	2600156	TT	TT	TT	TT	TT	TT	TT	TT	TT	TT	TT	TT	TT	TT	TT	TT	TT	TT	TT	TT	TT	TT	TT	TT	TT	TT	TT	TT	TT	TT	TT	TT	TT	TT	TT	TT	TT	TT	TT	TT	TT	TT	TT	TT	TT	TT	TT
Gm07_3281799_T_G	Gm07	3300645	--	TT	TG	TT	TT	TG	GG	GG	GG	GG	TT	GG	GG	GG	TT	GG	TT	TT	GG	TT	GG	GG	GG	TT	GG	TT	TT	--	--	GG	TG	TT	GG	TT	GG	TT	TT	TT	--	TT	TG	GG	TT	--	TT	TT	GG
Gm07_3318193_T_C	Gm07	3337039	--	TT	TT	TT	TT	TT	CC	CC	CC	CC	TT	CC	CC	CC	TT	CC	TT	TT	CC	TT	CC	CC	CC	TT	CC	TT	TT	CC	CC	CC	TT	TT	CC	TT	CC	TT	TT	TT	--	TT	TT	CC	TT	CC	TT	TT	CC
Gm07_4837493_A_G	Gm07	4885291	AG	GG	GG	AG	AG	GG	AG	GG	GG	AG	AG	GG	GG	GG	GG	GG	GG	AG	GG	GG	GG	GG	GG	GG	GG	GG	AG	GG	GG	GG	AG	GG	GG	GG	GG	GG	AG	AG	AG	AG	GG	GG	AG	--	AG	AG	AG
Gm07_4921108_G_A	Gm07	4968848	GG	AA	--	GG	GG	AA	GG	AA	AA	GG	GG	AA	AA	AA	AA	AG	AA	GG	AA	AA	AA	AA	AG	AA	AA	AA	GG	AA	AG	AA	GG	AA	AA	AA	AA	AA	GG	GG	GG	GG	AA	AA	GG	AG	GG	GG	GG
Gm07_4968383_C_T	Gm07	5016125	CC	TT	TT	CC	CC	TT	CC	TT	TT	CC	CC	TT	TT	TT	TT	TT	TT	CC	TT	TT	CC	TT	TT	TT	TT	TT	CC	TC	TT	TT	CC	TT	TT	TT	TT	TT	CC	CC	CC	CC	TT	TT	CC	TT	CC	CC	CC
Gm07_5014895_T_G	Gm07	5062637	TT	TT	TT	TT	TT	TT	TT	TT	TT	TT	TT	TT	TT	TT	TT	TT	TT	TT	TT	TT	TT	TT	TT	TT	TT	TT	TT	TT	TT	TT	TT	TT	TT	TT	TT	TT	TT	TT	TT	TT	TT	TT	TT	TT	TT	TT	TT
Gm07_5097877_A_C	Gm07	5145587	AA	AA	AA	AA	AA	AA	AA	AA	AA	AA	AA	AA	AA	AA	AA	AA	AA	AA	AA	AA	AA	AA	AA	AA	AA	AA	AA	AA	AA	AA	AA	AA	AA	AA	AA	AA	AA	AA	AA	AA	AA	AA	AA	AA	AA	AA	AA
Gm07_5152231_A_G	Gm07	5191003	AA	AA	AA	AA	AA	AA	AA	AA	AA	AA	AA	AA	AA	AA	AA	AA	AA	AA	AA	AA	AA	AA	AA	AA	AA	AA	AA	AA	AA	AA	AA	AA	AA	AA	AA	AA	AA	AA	AA	AA	AA	AA	AA	AA	AA	AA	AA
Gm07_5226366_C_T	Gm07	5265136	CC	CC	CC	CC	CC	CC	CC	CC	CC	CC	CC	CC	CC	CC	CC	CC	CC	CC	CC	CC	CC	CC	CC	CC	CC	CC	CC	CC	CC	CC	CC	CC	CC	CC	CC	CC	CC	CC	CC	CC	CC	CC	CC	CC	CC	CC	CC
Gm07_5352313_T_C	Gm07	5391104	TT	TT	TT	TT	TT	TT	TT	TT	TT	TT	TT	TT	TT	TT	TT	TT	TT	TT	TT	TT	TT	TT	TT	TT	TT	TT	TT	TT	TT	TT	TT	TT	TT	TT	TT	TT	TT	TT	TT	TT	TT	TT	TT	TT	TT	TT	TT
Gm07_5417760_T_C	Gm07	5456442	TT	TT	TT	TT	TT	TT	TT	TT	TT	TT	TT	TT	TT	TT	TT	TT	TT	TT	TT	TT	TT	TT	TT	TT	TT	TT	TT	TT	TT	TT	TT	TT	TT	TT	TT	TT	TT	TT	TT	TT	TT	TT	TT	TT	TT	TT	TT
Gm07_5490895_G_T	Gm07	5529532	TT	TT	TT	TT	TT	TT	TT	TT	TT	TT	TT	TT	TT	TT	TT	TT	TT	TT	TT	TT	TT	TT	TT	TT	TT	TT	TT	TT	TT	TT	TT	TT	TT	TT	TT	TT	TT	TT	TT	TT	TT	TT	TT	TT	TT	TT	TT
Gm07_5636973_T_C	Gm07	5798679	CC	CC	CC	CC	CC	CC	CC	CC	CC	CC	CC	CC	CC	CC	CC	CC	CC	CC	CC	CC	CC	CC	CC	CC	CC	CC	CC	CC	CC	CC	CC	CC	CC	CC	CC	CC	CC	CC	CC	CC	CC	CC	CC	CC	CC	CC	CC
Gm07_5863012_C_A	Gm07	5901279	AA	AA	AA	AA	AA	AA	AA	AA	AA	AA	AA	AA	AA	AA	AA	AA	AA	AA	AA	AA	AA	AA	AA	AA	AA	AA	AA	AA	AA	AA	AA	AA	AA	AA	AA	AA	AA	AA	AA	AA	AA	AA	AA	AA	AA	AA	AA
Gm07_5944283_A_G	Gm07	5982921	AA	AA	GG	AA	AA	AA	AA	GG	GG	AA	AA	GG	GG	GG	AA	AA	GG	AA	GG	AA	AA	GG	GG	GG	GG	AA	AA	AG	AA	GG	AA	GG	GG	AA	GG	AA	AA	AA	AA	AA	AA	GG	AA	GG	AA	AA	AA
Gm07_6161800_A_G	Gm07	6200435	--	GG	AG	GG	GG	GG	GG	AA	AA	GG	GG	AA	AA	AA	GG	GG	AA	GG	AA	GG	GG	--	AG	AA	AA	GG	GG	--	GG	AA	GG	AA	AA	GG	AA	GG	GG	GG	GG	GG	GG	--	GG	AG	GG	GG	GG
Gm07_6352113_T_G	Gm07	6390761	GG	GG	TG	GG	GG	GG	GG	TT	TT	GG	GG	TT	TT	TT	GG	GG	TT	GG	TT	GG	GG	TT	TG	TT	TT	GG	--	TT	GG	TT	GG	TT	TT	GG	TT	GG	GG	GG	GG	GG	GG	TG	GG	TG	GG	GG	GG
Gm07_6405598_A_G	Gm07	6444246	GG	GG	--	GG	GG	GG	GG	AA	AA	GG	GG	AA	AA	AA	GG	GG	AA	GG	AA	GG	GG	AA	AG	AA	AA	GG	--	AA	GG	AA	GG	AA	AA	GG	AA	GG	GG	GG	GG	GG	GG	--	GG	AG	GG	GG	GG
Gm07_6521175_T_C	Gm07	6559823	CC	CC	--	CC	CC	CC	CC	TT	TT	CC	CC	TT	TT	TT	CC	CC	TT	CC	TT	CC	CC	TT	TC	TT	TT	CC	--	TT	CC	TT	CC	TT	TT	CC	TT	CC	CC	CC	CC	CC	CC	--	CC	TC	CC	CC	CC
Gm07_6555810_T_C	Gm07	6594458	--	CC	--	CC	CC	CC	CC	TT	TT	CC	CC	TT	TT	TT	CC	CC	TT	CC	TT	CC	CC	TT	TC	TT	TT	CC	--	TT	CC	TT	CC	TT	TT	CC	TT	CC	CC	CC	CC	CC	CC	--	CC	TC	CC	CC	CC
Gm07_6604493_G_A	Gm07	6643125	--	AA	GG	AA	AA	AA	AA	GG	GG	AA	AA	GG	GG	GG	AA	AA	GG	AA	GG	AA	AA	GG	--	GG	GG	AA	AG	GG	AA	GG	AA	GG	GG	AA	GG	AA	AA	AA	AA	AA	--	GG	AA	AG	AA	AA	AA
Gm07_6726514_G_A	Gm07	6765164	AA	AA	GG	AA	AA	AA	AA	GG	GG	AA	AA	GG	GG	GG	AA	AA	GG	AA	GG	AA	AA	GG	GG	GG	GG	AA	AG	GG	AA	GG	AA	GG	GG	AA	GG	AA	AA	AA	AA	AA	AA	GG	AA	--	AA	AA	AA
Gm07_6781309_T_C	Gm07	6819959	CC	CC	TT	CC	CC	CC	CC	TT	TT	CC	CC	TT	TT	TT	CC	CC	TT	CC	TT	CC	CC	TT	TT	TT	TT	CC	TC	TT	CC	TT	CC	TT	TT	CC	TT	CC	CC	CC	CC	CC	--	TT	CC	TT	CC	CC	CC
Gm07_6859582_A_G	Gm07	6898693	AA	AA	AA	AA	AA	AA	AA	AA	AA	AA	AA	AA	AA	AA	AA	AA	AA	AA	AA	AA	AA	AA	AA	AA	AA	AA	AA	AA	AA	AA	AA	AA	AA	AA	AA	AA	AA	AA	AA	AA	AA	AA	AA	AA	AA	AA	AA
Gm07_6947362_A_G	Gm07	6985620	--	GG	AA	GG	GG	GG	GG	AA	AA	GG	GG	AA	AA	AA	GG	GG	AA	GG	AA	GG	GG	AA	--	AA	AA	GG	--	AA	GG	AA	GG	AA	AA	GG	AA	GG	GG	GG	GG	GG	GG	AG	GG	AG	GG	GG	GG
Gm07_6986674_G_A	Gm07	7024929	GG	GG	GG	GG	GG	GG	GG	GG	GG	GG	GG	GG	GG	GG	GG	GG	GG	GG	GG	GG	GG	GG	GG	GG	GG	GG	GG	GG	GG	GG	GG	GG	GG	GG	GG	GG	GG	GG	GG	GG	GG	GG	GG	GG	GG	GG	GG
Gm07_7096376_G_T	Gm07	7134727	TG	TT	GG	--	TT	TT	TT	GG	GG	TG	TT	GG	GG	GG	TT	TT	GG	TT	GG	TT	TT	GG	--	GG	GG	TT	GG	GG	TT	GG	TG	GG	GG	TT	GG	--	TT	TT	TT	TT	TG	--	TG	--	TT	TT	TT
Gm07_7160924_T_C	Gm07	7199289	--	CC	TC	CC	CC	CC	CC	TT	TT	CC	CC	TT	TT	TT	CC	CC	TT	CC	TT	CC	CC	TT	TC	TT	TT	CC	TT	TT	--	TT	CC	TT	TT	CC	TT	CC	CC	CC	CC	CC	CC	--	CC	TC	CC	CC	CC
Gm07_7207534_C_T	Gm07	7245899	TC	TT	CC	TC	TT	TT	TT	CC	CC	TC	--	CC	CC	CC	TT	TT	CC	TT	CC	TT	TT	CC	CC	CC	CC	TT	CC	CC	TC	CC	TC	CC	CC	TT	CC	TC	TT	TT	TT	TT	TC	--	TC	CC	TT	TT	TT
Gm07_7579367_G_A	Gm07	7618741	AG	AA	GG	--	GG	AA	AA	GG	--	--	AA	GG	GG	GG	AA	AA	AA	AA	GG	AA	AA	--	--	--	GG	AA	GG	GG	AG	GG	--	AA	AA	AA	AA	AA	AA	AA	AA	AA	AG	--	--	--	AA	AA	AA
Gm07_7618698_T_C	Gm07	7658072	CC	CC	TC	CC	TT	CC	CC	TT	CC	CC	CC	TT	TT	TT	CC	CC	CC	CC	TT	CC	CC	TC	--	CC	TT	CC	TT	TT	CC	TT	CC	CC	CC	CC	CC	CC	CC	CC	CC	CC	CC	--	CC	CC	CC	CC	CC
Gm07_7732175_G_A	Gm07	7771549	AA	AA	AA	AA	AA	AA	AA	AA	AA	AA	AA	AA	AA	AA	AA	AA	AA	AA	AA	AA	AA	AA	AA	AA	AA	AA	AA	AA	AA	AA	AA	AA	AA	AA	AA	AA	AA	AA	AA	AA	AA	AA	AA	AA	AA	AA	AA
Gm07_7984980_G_T	Gm07	8024362	TT	TT	GG	TG	GG	TT	TT	GG	TG	TG	TT	TT	GG	GG	TT	TT	TT	TT	GG	TT	TT	GG	GG	TG	GG	TT	GG	GG	TG	GG	TG	TT	TT	TT	TT	TT	TT	TT	TT	TT	TG	TT	TG	TG	TT	TT	--
Gm07_8327392_G_A	Gm07	8367502	GG	GG	AA	GG	AA	GG	GG	AA	GG	GG	GG	GG	AA	AA	GG	GG	GG	GG	AA	GG	--	AG	AG	GG	AA	GG	AA	AA	GG	AA	GG	GG	GG	GG	GG	GG	GG	GG	GG	GG	GG	GG	GG	GG	GG	GG	GG
Gm07_8385653_T_C	Gm07	8425687	TT	TT	CC	TT	CC	TT	TT	CC	TT	TT	TT	TT	CC	CC	TT	TT	TT	TT	CC	TT	--	CC	--	TT	CC	TT	CC	CC	TT	CC	TT	TT	TT	TT	TT	TT	TT	TT	TT	TT	TT	TT	TT	TT	TT	TT	TT
Gm07_8488086_A_G	Gm07	8528893	AA	AA	GG	AG	GG	AA	AG	GG	GG	AG	AA	AA	GG	GG	--	AA	AA	AA	GG	AA	--	GG	GG	--	GG	AA	GG	GG	AG	GG	AG	--	AA	AA	AA	AG	AA	AA	AA	AA	AA	AA	AG	AG	AA	AA	--
Gm07_8535939_T_C	Gm07	8576746	CC	CC	TT	CC	TT	CC	CC	TT	TT	CC	CC	CC	TT	TT	CC	CC	CC	CC	TT	CC	--	TC	TC	CC	TT	CC	TT	TT	CC	TT	CC	CC	CC	CC	CC	CC	CC	CC	CC	CC	CC	CC	CC	CC	CC	CC	CC
Gm07_8591371_G_A	Gm07	8632178	AA	AA	--	AA	GG	AA	AA	GG	GG	AA	AA	AA	GG	GG	AA	AA	GG	AA	GG	AA	--	GG	--	GG	GG	AA	GG	GG	AA	GG	AA	GG	GG	AA	GG	AA	AA	AA	AA	AA	AA	AA	AA	AG	AA	AA	AA
Gm07_8698310_G_A	Gm07	8739263	AA	AA	GG	AA	GG	AA	AA	GG	GG	AA	AA	AA	GG	GG	AA	AA	GG	AA	GG	AA	--	GG	--	GG	GG	AA	GG	GG	AA	GG	AA	GG	GG	AA	GG	AA	AA	AA	AA	AA	AA	AA	AA	--	AA	AA	AA
Gm07_8887938_C_T	Gm07	8928888	TT	TT	CC	TT	CC	TT	TT	CC	CC	TT	TT	TT	CC	CC	TT	TT	CC	TT	CC	TT	--	CC	TC	CC	CC	TT	CC	CC	TT	CC	TT	CC	CC	TT	CC	TT	TT	TT	TT	TT	TT	TT	TT	TC	TT	TT	TT
Gm07_8928954_G_A	Gm07	8969904	GG	GG	AA	GG	AA	GG	GG	AA	AA	GG	GG	GG	AA	AA	GG	GG	AA	GG	AA	GG	AG	AA	AG	AA	AA	GG	AA	AA	GG	AA	GG	AA	AA	GG	AA	GG	GG	GG	GG	GG	GG	GG	GG	AG	GG	GG	GG
Gm07_8966079_T_G	Gm07	9007029	GG	GG	TG	GG	TT	GG	GG	TT	TT	GG	GG	GG	TT	TT	GG	GG	TT	GG	TT	GG	--	--	TG	TT	TT	GG	TT	TT	GG	TT	GG	TT	TT	GG	TT	GG	GG	GG	GG	GG	GG	GG	GG	TG	GG	GG	GG
Gm07_9057074_G_A	Gm07	9098060	GG	GG	AA	GG	AA	GG	GG	AA	AA	GG	GG	GG	AA	GG	GG	GG	AA	GG	AA	GG	AG	AA	AG	AA	AA	GG	AA	AA	GG	AA	GG	AA	AA	GG	AA	GG	AA	GG	GG	GG	GG	GG	GG	AG	GG	AG	GG
Gm07_9102516_A_G	Gm07	9143502	AA	AA	GG	AA	GG	AA	AA	GG	GG	AA	AA	AA	GG	AA	AA	AA	GG	AA	GG	AA	AG	GG	AG	GG	GG	AA	GG	GG	AA	GG	AA	GG	GG	AA	GG	AA	GG	AA	AA	AA	AA	AA	AA	AG	AA	AG	AA
Gm07_9267799_G_A	Gm07	9305057	AA	AA	GG	AA	GG	AA	AA	GG	GG	AA	AA	AA	GG	AA	AA	AA	GG	AA	GG	AA	AG	GG	AG	GG	GG	AA	GG	GG	AA	GG	AA	GG	GG	AA	GG	AA	GG	AA	AA	AA	AA	AA	AA	AG	AA	AG	AA
Gm07_9305234_A_G	Gm07	9342241	GG	GG	AG	GG	AA	GG	GG	AA	AA	GG	GG	GG	AA	GG	GG	GG	AA	GG	AA	GG	--	AA	AG	AA	AA	GG	AA	AA	GG	AA	GG	AA	AA	GG	AA	GG	AA	GG	GG	GG	GG	GG	GG	AG	GG	--	GG
Gm07_9402863_A_G	Gm07	9439870	AA	AA	AA	AA	AA	AA	AA	AA	AA	AA	AA	AA	AA	AA	AA	AA	AA	AA	AA	AA	AA	AA	AA	AA	AA	AA	AA	AA	AA	AA	AA	AA	AA	AA	AA	AA	AA	AA	AA	AA	AA	AA	AA	AA	AA	AA	AA
Gm07_9452257_T_C	Gm07	9489274	TT	TT	CC	TT	CC	TT	TT	CC	CC	TT	TT	TT	CC	TT	TT	TT	CC	TT	CC	TT	TC	CC	CC	CC	CC	TT	CC	CC	TT	CC	TT	CC	CC	TT	CC	TT	CC	TT	TT	TT	TT	TT	TT	--	TT	TC	TT
Gm07_9535678_A_G	Gm07	9572695	AA	AA	AA	AA	AA	AA	AA	AA	AA	AA	AA	AA	AA	AA	AA	AA	AA	AA	AA	AA	AA	AA	AA	AA	AA	AA	AA	AA	AA	AA	AA	AA	AA	AA	AA	AA	AA	AA	AA	AA	AA	AA	AA	AA	AA	AA	AA
Gm07_9684260_C_T	Gm07	9730337	CC	CC	CC	CC	CC	CC	CC	CC	CC	CC	CC	CC	CC	CC	CC	CC	CC	CC	CC	CC	CC	CC	CC	CC	CC	CC	CC	CC	CC	CC	CC	CC	CC	CC	CC	CC	CC	CC	CC	CC	CC	CC	CC	CC	CC	CC	CC
Gm07_9774687_G_A	Gm07	9820764	GG	GG	GG	GG	GG	GG	GG	GG	GG	GG	GG	GG	GG	GG	GG	GG	GG	GG	GG	GG	GG	GG	GG	GG	GG	GG	GG	GG	GG	GG	GG	GG	GG	GG	GG	GG	GG	GG	GG	GG	GG	GG	GG	GG	GG	GG	GG
Gm07_9800952_A_G	Gm07	9847029	AA	AA	AA	AA	AA	AA	AA	AA	AA	AA	AA	AA	AA	AA	AA	AA	AA	AA	AA	AA	AA	AA	AA	AA	AA	AA	AA	AA	AA	AA	AA	AA	AA	AA	AA	AA	AA	AA	AA	AA	AA	AA	AA	AA	AA	AA	AA
Gm07_9863864_A_C	Gm07	9909832	AA	AA	AA	AA	AA	AA	AA	AA	AA	AA	AA	AA	AA	AA	AA	AA	AA	AA	AA	AA	AA	AA	AC	AA	AA	AA	AA	AA	AA	AA	AA	AA	AA	AA	AA	AA	AA	AA	AA	AA	AA	AA	AA	AA	AA	AA	AA
Gm07_10009107_G_A	Gm07	10054874	GG	GG	--	GG	AA	GG	GG	AA	AA	GG	GG	GG	AA	GG	GG	GG	AA	GG	AA	GG	--	AA	AG	AA	AA	GG	AA	AA	--	AA	GG	AA	AA	GG	AA	GG	AA	GG	GG	GG	GG	GG	GG	AG	GG	--	GG
Gm07_10117575_G_A	Gm07	10165542	GG	GG	AG	GG	AA	GG	GG	AA	--	GG	GG	GG	AA	GG	GG	GG	AA	GG	AA	GG	--	--	AG	AA	AA	GG	AA	AA	AG	AA	GG	AA	AA	GG	AA	GG	AA	GG	GG	GG	GG	GG	GG	AG	GG	--	GG
Gm07_10193199_G_A	Gm07	10241187	GG	GG	GG	GG	GG	GG	GG	GG	GG	GG	GG	GG	GG	GG	GG	GG	GG	GG	GG	GG	GG	GG	GG	GG	GG	GG	GG	GG	GG	GG	GG	GG	GG	GG	GG	GG	GG	GG	GG	GG	GG	GG	GG	GG	GG	GG	GG
Gm07_10236359_A_G	Gm07	10286005	AA	AA	AA	AA	AA	AA	AA	AA	AA	AA	AA	AA	AA	AA	AA	AA	AA	AA	AA	AA	AA	AA	AA	AA	AA	AA	AA	AA	AA	AA	AA	AA	AA	AA	AA	AA	AA	AA	AA	AA	AA	AA	AA	AA	AA	AA	AA
Gm07_10403810_C_T	Gm07	10453460	CC	CC	--	CC	TT	CC	CC	TT	TT	CC	CC	CC	TT	CC	CC	CC	TT	CC	TT	CC	--	TT	TC	TT	TT	CC	TT	TT	--	TT	CC	TT	TT	CC	TT	CC	CC	CC	CC	CC	CC	CC	CC	TC	CC	CC	CC
Gm07_10451670_C_T	Gm07	10501318	--	--	--	--	--	--	--	--	--	--	--	CC	--	--	--	--	--	--	--	--	--	--	--	--	--	--	--	--	--	--	--	--	--	--	--	--	--	--	--	--	--	--	--	--	--	--	--
Gm07_12858110_C_A	Gm07	12441147	CC	CC	AA	CC	AA	CC	CC	AA	AA	CC	CC	CC	AA	CC	CC	CC	AA	CC	AA	CC	CC	AA	AC	AA	AA	CC	AA	AA	AA	AA	CC	AA	AA	CC	AA	CC	CC	CC	CC	CC	CC	CC	CC	AC	CC	CC	CC
Gm07_11956773_T_C	Gm07	13346801	TT	TT	TT	TT	TT	TT	TT	TT	TT	TT	TT	TT	TT	TT	TT	TT	TT	TT	TT	TT	TT	TT	TT	TT	TT	TT	TT	TT	TT	TT	TT	TT	TT	TT	TT	TT	TT	TT	TT	TT	TT	TT	TT	TT	TT	TT	TT
Gm07_11762657_T_C	Gm07	13540657	TT	TT	TT	TT	TT	TT	TT	TT	TT	TT	TT	TT	TT	TT	TT	TT	TT	TT	TT	TT	TT	TT	TT	TT	TT	TT	TT	TT	TT	TT	TT	TT	TT	TT	TT	TT	TT	TT	TT	TT	TT	TT	TT	TT	TT	TT	TT
Gm07_11218843_C_T	Gm07	14092832	CC	CC	CC	CC	CC	CC	CC	CC	CC	CC	CC	CC	CC	CC	CC	CC	CC	CC	CC	CC	CC	CC	CC	CC	CC	CC	CC	CC	CC	CC	CC	CC	CC	CC	CC	CC	CC	CC	CC	CC	CC	CC	CC	CC	CC	CC	CC
Gm07_11153441_A_G	Gm07	14158741	AA	AA	AA	AA	AA	AA	AA	AA	AA	AA	AA	AA	AA	AA	AA	AA	AA	AA	AA	AA	AA	AA	AA	AA	AA	AA	AA	AA	AA	AA	AA	AA	AA	AA	AA	AA	AA	AA	AA	AA	AA	AA	AA	AA	AA	AA	AA
Gm07_10967802_C_T	Gm07	14344298	CC	CC	CC	CC	CC	CC	CC	CC	CC	CC	CC	CC	CC	CC	CC	CC	CC	CC	CC	CC	CC	CC	CC	CC	CC	CC	CC	CC	CC	CC	CC	CC	CC	CC	CC	CC	CC	CC	CC	CC	CC	CC	CC	CC	CC	CC	CC
Gm07_10926994_A_G	Gm07	14385106	AG	AG	GG	AG	GG	AG	AG	GG	GG	--	AG	AA	GG	AG	AG	AA	GG	AG	GG	AG	GG	GG	--	GG	GG	AG	GG	GG	GG	GG	AG	GG	GG	AG	GG	--	AG	AG	AG	AG	--	AG	AG	--	AG	AG	AG
Gm07_10806729_G_A	Gm07	14505370	GG	GG	AG	GG	AA	GG	GG	AA	AA	GG	GG	GG	AA	GG	GG	GG	AA	GG	AA	GG	AA	AA	--	AA	AA	GG	AA	AA	--	AA	GG	AA	AA	GG	AA	GG	GG	GG	GG	GG	AG	GG	GG	--	GG	GG	GG
Gm07_15590266_C_T	Gm07	15677304	CC	CC	TT	CC	TT	CC	CC	TT	TT	CC	CC	CC	TT	CC	CC	CC	CC	CC	TT	CC	TT	TC	--	CC	TT	CC	TT	CC	CC	TT	CC	CC	CC	CC	CC	CC	CC	CC	CC	CC	TT	CC	CC	CC	CC	CC	CC
Gm07_15663842_T_C	Gm07	15750880	TT	TT	CC	TT	CC	TT	TT	CC	CC	TT	TT	TT	CC	TT	TT	TT	TT	TT	CC	TT	CC	--	CC	TT	CC	TT	CC	TT	TT	CC	TT	TT	TT	TT	TT	TT	TT	TT	TT	TT	CC	TT	TT	TT	TT	TT	TT
Gm07_15717199_G_T	Gm07	15804237	GG	GG	TG	GG	TT	GG	GG	TG	--	GG	GG	GG	TT	GG	GG	GG	TT	GG	TT	GG	TT	TT	TG	TT	TT	GG	TT	GG	GG	TT	GG	TT	TT	GG	TT	GG	GG	GG	GG	GG	TG	GG	GG	TG	GG	GG	GG
Gm07_15748996_T_G	Gm07	15836034	--	TT	GG	--	GG	TT	TG	GG	GG	TG	--	TT	GG	TT	TT	TT	GG	--	GG	TT	GG	GG	GG	GG	GG	TT	GG	TT	TG	GG	TT	GG	GG	TT	GG	TT	TT	TT	TG	TT	GG	TT	TG	GG	TT	TT	TT
Gm07_15800472_A_G	Gm07	15887510	AA	AA	GG	AA	GG	AA	AA	GG	GG	AA	AA	AA	GG	AA	AA	AA	GG	AA	GG	AA	GG	GG	--	GG	GG	AA	GG	AA	AA	GG	AA	GG	GG	AA	GG	AA	AA	AA	AA	AA	GG	AA	AA	AG	AA	AA	AA
Gm07_15870753_C_A	Gm07	15960048	CC	CC	AA	CC	AA	CC	CC	AA	AA	CC	CC	CC	AA	CC	CC	CC	AA	CC	AA	CC	AA	AA	AC	AA	AA	CC	AA	CC	CC	AA	CC	AA	AA	CC	AA	CC	CC	CC	CC	CC	AA	CC	CC	AC	CC	CC	CC
Gm07_16020670_G_T	Gm07	16111431	GG	GG	GG	GG	GG	GG	GG	GG	GG	GG	GG	GG	GG	GG	GG	GG	GG	GG	GG	GG	GG	GG	GG	GG	GG	GG	GG	GG	GG	GG	GG	GG	GG	GG	GG	GG	GG	GG	GG	GG	GG	GG	GG	GG	GG	GG	GG
Gm07_16031010_C_T	Gm07	16121771	CC	CC	CC	CC	CC	CC	CC	CC	CC	CC	CC	CC	CC	CC	CC	CC	CC	CC	CC	CC	CC	CC	CC	CC	CC	CC	CC	CC	CC	CC	CC	CC	CC	CC	CC	CC	CC	CC	CC	CC	CC	CC	CC	CC	CC	CC	CC
Gm07_16100034_C_T	Gm07	16190796	CC	CC	CC	CC	CC	CC	CC	CC	CC	CC	CC	CC	CC	CC	CC	CC	CC	CC	CC	CC	CC	CC	CC	CC	CC	CC	CC	CC	CC	CC	CC	CC	CC	CC	CC	CC	CC	CC	CC	CC	CC	CC	CC	CC	CC	CC	CC
Gm07_16155436_G_A	Gm07	16244037	GG	GG	GG	GG	GG	GG	GG	GG	GG	GG	GG	GG	GG	GG	GG	GG	GG	GG	GG	GG	GG	GG	GG	GG	GG	GG	GG	GG	GG	GG	GG	GG	GG	GG	GG	GG	GG	GG	GG	GG	GG	GG	GG	GG	GG	GG	GG
Gm07_17362808_A_G	Gm07	17449401	AA	AA	AA	AA	AA	AA	AA	AA	GG	AA	AA	AA	AA	AA	AA	AA	GG	AA	AA	AA	AA	AA	AA	GG	AA	AA	AA	AA	AA	AA	AA	GG	GG	AA	GG	AA	AA	AA	AA	AA	AA	AA	AA	GG	AA	AA	AA
Gm07_18293045_C_T	Gm07	18382782	CC	CC	CC	CC	CC	CC	CC	CC	TT	CC	CC	CC	CC	CC	CC	CC	TT	CC	CC	CC	CC	CC	CC	TT	CC	CC	CC	CC	CC	CC	CC	TT	TT	CC	TT	CC	CC	CC	CC	CC	CC	CC	CC	TT	CC	CC	CC
Gm07_18633505_T_C	Gm07	18723135	CC	CC	CC	CC	CC	CC	CC	CC	TT	CC	CC	CC	CC	CC	CC	CC	TT	CC	CC	CC	CC	CC	CC	TT	CC	CC	CC	CC	CC	CC	CC	TT	TT	CC	TT	CC	CC	CC	CC	CC	CC	CC	CC	TT	CC	CC	CC
Gm07_23710284_A_G	Gm07	23456879	GG	GG	GG	GG	GG	GG	GG	GG	GG	GG	GG	GG	GG	GG	GG	GG	GG	GG	GG	GG	GG	GG	GG	GG	GG	GG	GG	GG	GG	GG	GG	GG	GG	GG	GG	GG	GG	GG	GG	GG	GG	GG	GG	GG	GG	GG	GG
Gm07_31363791_T_C	Gm07	31263344	CC	CC	CC	CC	CC	CC	CC	CC	TT	CC	CC	CC	CC	CC	CC	CC	TT	CC	CC	CC	CC	CC	CC	TT	CC	CC	CC	CC	CC	CC	CC	TT	TT	CC	TT	CC	CC	CC	CC	CC	CC	CC	CC	TC	CC	CC	CC
Gm07_32588864_T_C	Gm07	32484469	CC	CC	CC	CC	CC	CC	CC	CC	TT	CC	CC	CC	CC	CC	CC	CC	TT	CC	CC	CC	CC	CC	CC	TT	CC	CC	CC	CC	CC	CC	CC	TT	TT	CC	TT	CC	CC	CC	CC	CC	CC	CC	CC	TC	CC	CC	CC
Gm07_33333813_T_C	Gm07	33227966	CC	CC	CC	CC	CC	CC	CC	CC	TT	CC	CC	CC	CC	CC	CC	CC	TT	CC	CC	CC	CC	CC	CC	TT	CC	CC	CC	CC	CC	CC	CC	TT	TT	CC	TT	CC	CC	CC	CC	CC	CC	CC	CC	TC	CC	CC	CC
Gm07_33718140_A_G	Gm07	33595655	GG	GG	GG	--	GG	GG	GG	GG	AA	GG	GG	GG	GG	GG	GG	GG	AA	GG	--	GG	GG	--	GG	AA	GG	GG	GG	GG	GG	GG	GG	AA	AA	GG	AA	GG	GG	GG	GG	GG	GG	GG	GG	--	GG	GG	GG
Gm07_34580678_G_A	Gm07	34451110	--	AA	AA	AG	AA	AA	AA	AA	GG	AA	AA	AA	AA	AA	AA	AA	GG	AA	AG	AA	AA	AG	AA	GG	AA	AA	AA	AA	AA	AA	AA	GG	GG	AA	GG	AA	AA	AA	AA	AA	AA	AA	--	GG	AA	AA	AA
Gm07_35142318_A_G	Gm07	35006083	AA	AA	AA	AA	AA	AA	AA	AA	--	AA	AA	AA	AA	AA	AA	AA	GG	AA	AA	AA	AA	AA	AA	--	AA	AA	AA	AA	AA	AA	AA	GG	GG	AA	GG	AA	AA	AA	AA	AA	AA	AA	AA	AG	AA	AA	AA
Gm07_35547398_T_C	Gm07	35411154	TT	TT	TT	TT	TT	TT	TT	TT	TT	TT	TT	TT	TT	TT	TT	TT	TT	TT	TT	TT	TT	TT	TT	TT	TT	TT	TT	TT	TT	TT	TT	TT	TT	TT	TT	TT	TT	TT	TT	TT	TT	TT	TT	TT	TT	TT	TT
Gm07_35619623_G_A	Gm07	35483387	GG	GG	GG	GG	GG	GG	GG	GG	GG	GG	GG	GG	GG	GG	GG	GG	GG	GG	GG	GG	GG	GG	GG	GG	GG	GG	GG	GG	GG	GG	GG	GG	GG	GG	GG	GG	GG	GG	GG	GG	GG	GG	GG	GG	GG	GG	GG
Gm07_37193303_C_T	Gm07	37098897	--	CC	CC	TT	TT	CC	TT	TT	CC	TT	TT	CC	TT	TT	TT	TT	CC	TT	TT	TC	TT	TT	TT	TT	TT	CC	TT	TT	TC	TT	TT	TT	CC	TT	TT	CC	TT	TT	TT	TT	TT	TT	TT	CC	TT	TT	TT
Gm07_37260926_G_A	Gm07	37166523	AA	GG	GG	AA	AA	GG	AA	AA	GG	AA	AA	GG	AA	AA	AA	AA	GG	AA	AA	AG	AA	AA	AA	AA	AA	GG	AA	AA	AA	AA	AA	AA	GG	AA	AA	GG	AA	AA	AA	AA	AA	AA	AA	GG	AA	AA	AA
Gm07_37272144_G_T	Gm07	37177741	GG	TT	TT	GG	GG	TT	GG	GG	TT	GG	GG	TT	GG	GG	GG	GG	TT	GG	GG	TG	GG	GG	GG	GG	GG	TT	GG	GG	GG	GG	GG	GG	TT	GG	GG	TT	GG	GG	GG	GG	GG	GG	GG	TT	GG	GG	GG
Gm07_37416258_G_A	Gm07	37321895	GG	AA	AG	GG	GG	AG	GG	GG	AA	GG	GG	AA	GG	GG	GG	GG	AA	GG	GG	--	GG	GG	GG	GG	GG	AG	GG	GG	GG	GG	GG	GG	AA	GG	GG	AA	GG	GG	GG	GG	GG	GG	GG	AG	GG	GG	GG
Gm07_37710555_C_T	Gm07	37616073	TT	CC	CC	TT	TT	CC	TT	TT	CC	TT	TT	CC	TT	TT	TT	TT	CC	TT	TT	TC	TT	TT	TT	TT	TT	CC	TT	TT	TT	TT	TT	TT	CC	TT	TT	CC	TT	TT	TT	TT	TT	TT	TT	CC	TT	TT	TT
Gm07_37813869_A_G	Gm07	37719046	AA	GG	GG	AA	AA	GG	AA	AA	GG	AA	AA	GG	AA	AA	AA	AA	GG	AA	AA	AG	AA	AA	AA	AA	AA	GG	AA	AA	AA	AA	AA	AA	GG	AA	AA	GG	AA	AA	AA	AA	AA	AA	AA	GG	AA	AA	AA
Gm07_37876224_T_C	Gm07	37781401	CC	TT	TT	CC	CC	TT	CC	CC	TT	CC	CC	TT	CC	CC	CC	CC	TT	CC	CC	TC	CC	CC	CC	CC	CC	TT	CC	CC	CC	CC	CC	CC	TT	CC	CC	TT	CC	CC	CC	CC	CC	CC	CC	TT	CC	CC	CC
Gm07_37983142_C_A	Gm07	37888361	AA	CC	CC	AA	AA	CC	AA	AA	CC	AA	AA	CC	AA	AA	AA	AA	CC	AA	AA	AC	AA	AA	AA	AA	AA	CC	AA	AA	AA	AA	AA	AA	CC	AA	AA	CC	AA	AA	AA	AA	AA	AA	AA	CC	AA	AA	AA
Gm07_38106438_A_C	Gm07	38066078	CC	AA	AA	CC	CC	AA	CC	CC	AA	CC	CC	AA	CC	CC	CC	CC	AA	CC	CC	AC	CC	CC	CC	CC	CC	AA	CC	CC	CC	CC	CC	CC	AA	CC	CC	AA	CC	CC	CC	CC	CC	CC	CC	AA	CC	CC	CC
Gm07_38334707_G_A	Gm07	38295714	AA	AA	AA	AA	GG	AA	AA	GG	--	--	AA	AA	GG	GG	GG	GG	AA	GG	GG	--	AA	GG	--	GG	--	AA	GG	AA	GG	GG	AA	GG	AA	GG	GG	AA	AA	AA	AG	AA	GG	GG	--	AA	AA	AA	AA
Gm07_38429072_C_T	Gm07	38390079	TT	TT	TT	TT	CC	TT	TT	CC	TT	TT	TT	TT	CC	CC	CC	CC	TT	CC	CC	TC	TT	CC	TC	CC	TT	TT	CC	TT	TC	CC	TT	CC	TT	CC	CC	TT	TT	TT	TT	TT	CC	CC	TT	TT	TT	TT	TT
Gm07_38631457_T_C	Gm07	38592439	--	TC	CC	TT	TT	CC	TT	TC	CC	TT	TT	CC	TT	TT	TT	TT	CC	TT	TT	TC	TT	TT	TT	TT	TT	CC	TT	TT	TC	TT	TT	TT	CC	TT	TT	CC	TT	TT	TT	TT	TT	TT	TT	CC	TT	TT	TT
Gm07_38811817_A_G	Gm07	38770938	AA	AG	AA	AA	GG	AA	AA	AG	AA	AA	AA	AA	GG	GG	GG	GG	AA	GG	GG	AG	AA	GG	AG	GG	AA	AA	GG	AA	AG	GG	AA	GG	AA	GG	GG	AA	AA	AA	AA	AA	GG	GG	AA	AA	AA	AA	AA
Gm07_38861000_C_T	Gm07	38820121	CC	TC	TT	CC	CC	TT	CC	TT	TT	CC	CC	TT	CC	CC	CC	CC	TT	CC	CC	TC	CC	CC	CC	CC	CC	TT	CC	CC	TC	CC	CC	CC	TT	CC	CC	TT	CC	CC	CC	CC	CC	CC	CC	TT	CC	CC	CC
Gm07_39160931_A_G	Gm07	39121324	GG	AG	GG	GG	AA	GG	GG	AG	GG	GG	GG	GG	AA	AA	AA	AA	GG	AA	AG	AG	GG	AA	AG	AA	GG	GG	AA	GG	AG	AA	GG	AA	GG	AA	AA	GG	GG	GG	GG	GG	AA	AA	GG	GG	GG	GG	GG
Gm07_39225759_C_T	Gm07	39181995	TT	TC	TT	TT	CC	TT	TT	TC	TT	TT	TT	TT	CC	CC	CC	CC	TT	CC	TC	TC	TT	CC	TC	CC	TT	TT	CC	TT	TC	CC	TT	CC	TT	CC	CC	TT	TT	TT	TT	TT	CC	CC	TT	TT	TT	TT	TT
Gm07_42450573_A_G	Gm07	42396323	GG	AA	AA	GG	GG	AA	GG	GG	GG	GG	GG	GG	GG	GG	GG	GG	GG	GG	GG	AG	GG	GG	GG	GG	GG	AA	GG	GG	AG	GG	GG	GG	GG	GG	GG	AA	GG	GG	GG	GG	GG	GG	GG	GG	GG	GG	GG
Gm07_42643191_A_G	Gm07	42588941	--	GG	GG	AA	AA	GG	AA	AA	AA	AA	AA	AA	AA	AA	AA	AA	AA	AA	AA	AG	AA	AA	AA	AA	AA	GG	AA	AA	AG	AA	AA	AA	AA	AA	AA	GG	AA	AA	AA	AA	AA	AA	AA	AA	AA	AA	AA
Gm07_42851461_T_C	Gm07	42797211	CC	CC	CC	CC	TT	CC	CC	TT	TT	CC	CC	TT	TT	TT	TC	TT	CC	TT	CC	TC	CC	TT	TT	TT	CC	CC	TT	CC	TC	TT	CC	TT	TT	TT	TT	CC	TT	CC	CC	CC	TT	TT	CC	--	CC	TT	CC
Gm07_42923420_G_A	Gm07	42869168	AA	AA	AA	AA	GG	AA	AA	GG	GG	AA	AA	GG	GG	GG	AG	GG	AA	GG	AA	AG	AA	GG	GG	GG	AA	AA	GG	AA	AG	GG	AA	GG	GG	GG	GG	AA	GG	AA	AA	AA	GG	GG	AA	--	AA	GG	AA
Gm07_42963672_C_A	Gm07	42909420	AA	CC	CC	AA	CC	CC	AA	CC	CC	AA	AA	CC	CC	CC	CC	CC	AA	CC	AA	CC	AA	CC	CC	CC	AA	CC	CC	AA	CC	CC	AA	CC	CC	CC	CC	CC	CC	AA	AA	AA	CC	CC	AA	--	AA	CC	AA
Gm07_43067274_G_T	Gm07	43012666	TG	GG	GG	TT	GG	GG	TT	GG	GG	--	TT	GG	GG	GG	GG	GG	TT	GG	--	GG	TT	GG	GG	GG	TT	GG	GG	TT	GG	GG	TT	GG	GG	GG	GG	GG	GG	TT	TG	TT	GG	GG	--	--	TT	GG	TT
Gm07_43946876_A_G	Gm07	43893649	GG	AA	AA	GG	GG	AA	GG	GG	GG	GG	GG	GG	GG	GG	AA	GG	GG	GG	GG	AA	GG	GG	GG	GG	GG	GG	GG	GG	AA	GG	GG	GG	GG	AA	GG	AA	GG	GG	GG	GG	GG	GG	GG	--	GG	GG	GG
Gm07_44621109_A_G	Gm07	44567848	AA	AA	AA	AA	AA	AA	AA	AA	AA	AA	AA	AA	AA	AA	AA	AA	AA	AA	AA	AA	AA	AA	AA	AA	AA	AA	AA	AA	AA	AA	AA	AA	AA	AA	AA	AA	AA	AA	AA	AA	AA	AA	AA	AA	AA	AA	AA
Gm08_1504393_C_T	Gm08	1506737	CC	TT	TT	CC	CC	CC	CC	TT	CC	CC	CC	TT	CC	CC	CC	TT	TT	CC	CC	CC	CC	TT	CC	CC	CC	CC	CC	CC	TC	CC	CC	TT	CC	CC	TC	CC	CC	CC	CC	CC	TT	CC	CC	CC	CC	CC	CC
Gm08_1817703_A_G	Gm08	1821010	AA	GG	GG	AA	AA	AA	AA	GG	AA	AA	--	GG	AA	AA	AA	GG	GG	AA	AA	AA	AA	GG	AG	AA	AA	AA	AA	AA	--	AA	AG	GG	AA	AA	--	AA	AA	AA	AG	AA	GG	AA	AA	AA	AA	AA	AA
Gm08_2288307_A_G	Gm08	2292177	AG	GG	GG	AA	AA	AA	AA	GG	GG	AA	--	GG	AA	AA	AA	GG	GG	AA	--	AA	AA	GG	AG	AA	AA	AA	AA	AA	AA	AA	AG	GG	AA	AA	--	AA	AA	AA	AG	AA	GG	AA	AA	--	AA	AA	AA
Gm08_2394647_G_A	Gm08	2398166	GG	AA	AA	GG	GG	GG	GG	AA	AA	GG	GG	AA	GG	GG	GG	AA	AA	GG	GG	GG	GG	AA	GG	GG	GG	GG	GG	GG	GG	GG	GG	AA	GG	GG	--	GG	GG	GG	GG	GG	AA	GG	GG	--	GG	GG	GG
Gm08_2467547_G_T	Gm08	2471066	TG	TT	TT	GG	GG	GG	GG	TT	TT	GG	TG	TT	GG	GG	GG	TT	TT	GG	GG	GG	GG	TT	TG	GG	GG	GG	GG	GG	GG	GG	TG	TT	GG	GG	--	GG	GG	GG	TG	GG	TT	GG	GG	--	GG	GG	GG
Gm08_2837248_T_C	Gm08	2840929	TC	CC	TT	CC	CC	CC	CC	TT	CC	CC	TC	TT	CC	CC	CC	TT	TT	CC	TC	CC	CC	TT	TC	CC	CC	CC	CC	CC	CC	CC	TC	TT	CC	CC	--	CC	CC	CC	TC	CC	TT	CC	CC	--	CC	CC	CC
Gm08_3018731_A_C	Gm08	3022795	CC	CC	AC	CC	CC	CC	CC	AA	CC	CC	--	AA	CC	CC	CC	AC	AA	CC	CC	CC	CC	AA	CC	CC	CC	CC	CC	CC	CC	CC	CC	AA	CC	CC	--	CC	CC	CC	--	CC	AA	CC	CC	--	CC	CC	CC
Gm08_3178655_C_A	Gm08	3182921	CC	CC	AA	CC	CC	CC	CC	AA	CC	CC	CC	AA	CC	CC	CC	AA	AA	CC	CC	CC	CC	AA	CC	CC	CC	CC	CC	CC	CC	CC	CC	AA	CC	CC	AA	CC	CC	CC	--	CC	AA	CC	CC	AC	CC	CC	CC
Gm08_3272385_G_T	Gm08	3276651	GG	GG	GG	GG	GG	GG	GG	GG	GG	GG	GG	GG	GG	GG	GG	GG	GG	GG	GG	GG	GG	GG	GG	GG	GG	GG	GG	GG	GG	GG	GG	GG	GG	GG	GG	GG	GG	GG	GG	GG	GG	GG	GG	GG	GG	GG	GG
Gm08_3285222_T_C	Gm08	3289486	TT	TT	TT	TT	TT	TT	TT	TT	TT	TT	TT	TT	TT	TT	TT	TT	TT	TT	TT	TT	TT	TT	TT	TT	TT	TT	TT	TT	TT	TT	TT	TT	TT	TT	TT	TT	TT	TT	TT	TT	TT	TT	TT	TT	TT	TT	TT
Gm08_3985008_T_C	Gm08	3991132	CC	CC	TT	CC	CC	CC	CC	TT	CC	CC	CC	TT	CC	CC	CC	TT	TT	CC	CC	CC	CC	--	CC	CC	CC	CC	CC	CC	TT	CC	CC	CC	CC	CC	TT	CC	CC	CC	CC	CC	TT	CC	CC	TC	CC	CC	CC
Gm08_4266625_A_C	Gm08	4272701	AA	AA	AA	AA	AA	AA	AA	AA	AA	AA	AA	AA	AA	AA	AA	AA	AA	AA	AA	AA	AA	AA	AA	AA	AA	AA	AA	AA	AA	AA	AC	AA	AA	AA	AA	AA	AA	AA	AA	AA	AA	AA	AA	AA	AA	AA	AA
Gm08_4873149_C_T	Gm08	4879302	CC	CC	CC	CC	CC	CC	CC	CC	CC	CC	CC	CC	CC	CC	CC	CC	CC	CC	CC	CC	CC	CC	CC	CC	CC	CC	CC	CC	CC	CC	CC	CC	CC	CC	CC	CC	CC	CC	CC	CC	CC	CC	CC	CC	CC	CC	CC
Gm08_4882276_A_G	Gm08	4888429	AA	AA	AA	AA	AA	AA	AA	AA	AA	AA	AA	AA	AA	AA	AA	AA	AA	AA	AA	AA	AA	AA	AA	AA	AA	AA	AA	AA	AA	AA	AG	AA	AA	AA	AA	AA	AA	AA	AA	AA	AA	AA	AA	AA	AA	AA	AA
Gm08_4959623_T_C	Gm08	4965776	TT	TT	TT	TT	TT	TT	TT	TT	TT	TT	TT	TT	TT	TT	TT	TT	TT	TT	TT	TT	TT	TT	TT	TT	TT	TT	TT	TT	TT	TT	TT	TT	TT	TT	TT	TT	TT	TT	TT	TT	TT	TT	TT	TT	TT	TT	TT
Gm08_5003648_C_T	Gm08	5009800	CC	CC	CC	CC	CC	CC	CC	CC	CC	CC	CC	CC	CC	CC	CC	CC	CC	CC	CC	CC	CC	CC	CC	CC	CC	CC	CC	CC	CC	CC	CC	CC	CC	CC	CC	CC	CC	CC	CC	CC	CC	CC	CC	CC	CC	CC	CC
Gm08_5082382_G_T	Gm08	5088534	GG	GG	GG	GG	GG	GG	GG	GG	GG	GG	GG	GG	GG	GG	GG	GG	GG	GG	GG	GG	GG	GG	GG	GG	GG	GG	GG	GG	GG	GG	GG	GG	GG	GG	GG	GG	GG	GG	GG	GG	GG	GG	GG	GG	GG	GG	GG
Gm08_5278800_G_T	Gm08	5287858	GG	GG	GG	GG	GG	GG	GG	GG	GG	GG	GG	GG	GG	GG	GG	GG	GG	GG	GG	GG	GG	GG	GG	GG	GG	GG	GG	GG	GG	GG	TG	GG	GG	GG	GG	GG	GG	GG	GG	GG	GG	GG	GG	GG	GG	GG	GG
Gm08_5701842_C_T	Gm08	5709053	TT	TT	TT	TT	CC	TT	CC	TT	TT	TC	CC	TT	TT	CC	TT	TT	TT	TT	TT	TT	TT	TT	TC	TT	CC	TT	CC	TT	TT	TT	TC	TT	TT	TT	TT	TT	TT	CC	TT	TT	TT	CC	--	--	TT	TT	TT
Gm08_7103134_G_A	Gm08	7108611	--	GG	GG	GG	GG	AA	GG	GG	AA	GG	GG	GG	GG	GG	GG	AA	GG	GG	GG	GG	GG	AA	GG	AA	GG	AG	GG	GG	AA	GG	GG	GG	AA	AA	AA	GG	GG	GG	GG	GG	AA	GG	GG	--	GG	GG	GG
Gm08_8268861_A_C	Gm08	8273185	CC	CC	CC	AA	AA	CC	AA	CC	CC	AA	AA	CC	CC	AC	CC	CC	CC	CC	CC	CC	CC	CC	CC	CC	AA	CC	AA	CC	CC	AA	AC	CC	CC	CC	CC	CC	CC	CC	AA	CC	CC	AA	AA	--	AA	CC	AA
Gm08_8305965_T_C	Gm08	8310289	CC	CC	CC	TT	TT	CC	TT	CC	CC	TT	TT	CC	CC	TC	CC	CC	CC	CC	CC	CC	CC	CC	CC	CC	TT	CC	TT	CC	CC	TT	TT	CC	CC	CC	CC	CC	CC	CC	TT	CC	CC	TT	TT	--	TT	CC	TT
Gm08_10570097_C_T	Gm08	10482820	CC	CC	CC	CC	CC	CC	CC	CC	CC	CC	CC	CC	CC	CC	CC	CC	CC	CC	CC	CC	CC	CC	CC	CC	CC	CC	CC	CC	CC	CC	CC	CC	CC	CC	CC	CC	CC	CC	CC	CC	CC	CC	CC	TC	CC	CC	CC
Gm08_10735245_T_G	Gm08	10646123	TT	TT	GG	GG	GG	GG	TT	TT	GG	GG	GG	TT	TT	TT	TT	GG	GG	GG	TT	TT	TT	GG	TT	GG	GG	GG	GG	TT	--	GG	TG	GG	GG	GG	GG	TT	GG	TT	GG	TT	GG	TT	GG	GG	GG	GG	GG
Gm08_10789902_T_C	Gm08	10700780	TT	TT	TT	TT	TT	TT	TT	TT	TT	TT	TT	TT	TT	TT	TT	TT	TT	TT	TT	TT	TT	TT	TT	TT	TT	TT	TT	TT	TT	TT	TT	TT	TT	TT	TT	TT	TT	TT	TT	TT	TT	TT	TT	TT	TT	TT	TT
Gm08_10947242_C_T	Gm08	10858120	CC	CC	CC	CC	CC	CC	CC	CC	CC	CC	CC	CC	CC	CC	CC	CC	CC	CC	CC	CC	CC	CC	CC	CC	CC	CC	CC	CC	CC	CC	CC	CC	CC	CC	CC	CC	CC	CC	CC	CC	CC	CC	CC	CC	CC	CC	CC
Gm08_11073425_T_G	Gm08	10984300	TT	TT	TT	TT	TT	TT	TT	TT	TT	TT	TT	TT	TT	TT	TT	TT	TT	TT	TT	TT	TT	TT	TT	TT	TT	TT	TT	TT	TT	TT	TT	TT	TT	TT	TT	TT	TT	TT	TT	TT	TT	TT	TT	TG	TT	TT	TT
Gm08_11257840_T_C	Gm08	11168730	TT	TT	TT	TT	TT	TT	TT	TT	TT	TT	TT	TT	TT	TT	TT	TT	TT	TT	TT	TT	TT	TT	TT	TT	TT	TT	TT	TT	TT	TT	TT	TT	TT	TT	TT	TT	TT	TT	TT	TT	TT	TT	TT	TC	TT	TT	TT
Gm08_11451417_C_T	Gm08	11367862	CC	CC	TT	TT	TT	TC	CC	CC	TT	TT	TT	CC	CC	CC	CC	TT	TT	--	CC	CC	CC	TT	CC	TT	CC	--	TT	CC	--	TT	--	TT	TT	TT	TT	CC	CC	CC	TC	CC	--	CC	TT	TC	TT	CC	--
Gm08_11759489_C_T	Gm08	11676355	CC	CC	TT	TT	TT	TC	CC	CC	--	TT	TT	CC	CC	CC	CC	TT	TT	--	CC	CC	CC	TT	CC	TT	CC	--	TT	CC	--	TT	--	TT	TT	TT	TT	CC	CC	CC	TC	CC	--	CC	TT	TC	TT	CC	--
Gm08_11971416_C_T	Gm08	11888613	TT	TT	CC	CC	CC	--	TT	TT	CC	CC	CC	TT	TT	TT	TT	CC	CC	--	CC	TT	CC	CC	TT	CC	TT	--	CC	TT	--	CC	--	CC	CC	CC	CC	TT	TT	TT	TC	TT	TC	TT	CC	--	CC	TT	--
Gm08_12055669_A_G	Gm08	11973143	AA	AA	GG	GG	GG	AG	AA	AA	--	GG	GG	AA	AA	AA	AA	GG	GG	--	GG	AA	GG	GG	AA	GG	AA	--	GG	AA	--	GG	--	GG	GG	GG	GG	AA	AA	--	AG	AA	AG	AA	GG	AG	GG	AA	--
Gm08_12189320_G_A	Gm08	12106889	GG	GG	AA	AA	AA	AA	GG	GG	AA	AA	AA	GG	GG	GG	GG	AA	AA	AG	AA	GG	AA	AA	GG	AA	GG	AG	AA	GG	AG	AA	AG	AA	AA	AA	AA	GG	GG	GG	AA	GG	AG	GG	AA	AA	AA	GG	AG
Gm08_12251183_T_C	Gm08	12168750	TT	TT	CC	CC	CC	--	TT	TT	CC	CC	CC	TT	TT	TT	TT	CC	CC	--	CC	TT	CC	CC	TT	CC	TT	--	CC	TT	--	CC	--	CC	CC	CC	CC	TT	TT	--	TC	TT	TC	TT	CC	TC	CC	TT	--
Gm08_12309919_A_G	Gm08	12227484	AA	AA	GG	GG	GG	GG	--	AA	GG	GG	GG	AA	AA	AA	AA	GG	GG	AG	GG	AA	GG	GG	AA	GG	--	AG	GG	AA	AG	GG	--	GG	GG	GG	GG	AA	AA	AG	GG	AA	--	AA	GG	GG	GG	AA	AG
Gm08_12392887_C_T	Gm08	12310493	TT	TT	CC	CC	CC	CC	TT	TT	CC	CC	CC	TT	TT	TT	TT	CC	CC	TC	CC	TT	CC	CC	TT	CC	TT	TC	CC	TT	TC	CC	TC	CC	CC	CC	CC	TT	TT	--	--	TT	--	TT	CC	--	CC	TT	TC
Gm08_13040141_A_G	Gm08	12966725	AA	AA	AA	AA	AA	AA	AA	AA	AA	AA	AA	AA	AA	AA	AA	AA	AA	AA	AA	AA	AA	AA	AA	AA	AA	AA	AA	AA	AA	AA	AA	AA	AA	AA	AA	AA	AA	AA	AA	AA	AA	AA	AA	AA	AA	AA	AA
Gm08_13880758_T_C	Gm08	13815507	TT	TT	TC	CC	CC	--	CC	TT	CC	CC	CC	TT	TT	CC	TT	--	CC	TC	CC	TT	CC	TC	CC	CC	TT	--	TT	TT	TC	CC	CC	CC	CC	CC	CC	CC	CC	--	--	TT	--	CC	CC	--	CC	CC	TC
Gm08_13914377_A_G	Gm08	13849126	AA	AA	AG	GG	GG	GG	GG	AA	GG	GG	GG	AA	AA	GG	AA	--	GG	AG	GG	AA	GG	AG	GG	GG	AA	--	AA	AA	AG	GG	GG	GG	GG	GG	GG	GG	GG	--	--	AA	--	GG	GG	GG	GG	GG	AG
Gm08_14004130_G_A	Gm08	13934839	GG	GG	--	--	AA	AG	AA	GG	AA	--	AA	GG	GG	AA	GG	GG	AA	--	--	GG	AA	--	AA	AA	GG	--	GG	GG	--	AA	AA	AA	AA	AA	AA	AA	AA	GG	AG	GG	AG	--	--	AA	AA	AA	--
Gm08_14233959_A_C	Gm08	14164691	AA	AA	AC	CC	CC	CC	CC	AA	CC	CC	CC	AA	AA	CC	AA	AA	CC	AC	CC	AA	CC	AC	CC	CC	AA	AC	AA	AA	--	CC	CC	CC	CC	CC	CC	CC	CC	AA	--	AA	AC	CC	CC	CC	CC	CC	AC
Gm08_14353179_A_C	Gm08	14283732	AA	AA	AA	AA	AA	AA	AA	AA	AA	AA	AA	AA	AA	AA	AA	AA	AA	AA	AA	AA	AA	AA	AC	AA	AA	AA	AA	AA	AA	AA	AA	AA	AA	AA	AA	AA	AA	AA	AA	AA	AA	AA	AA	AC	AA	AA	AA
Gm08_14431777_C_A	Gm08	14362330	CC	CC	CC	CC	CC	CC	CC	CC	CC	CC	CC	CC	CC	CC	CC	CC	CC	CC	CC	CC	CC	CC	CC	CC	CC	CC	CC	CC	CC	CC	CC	CC	CC	CC	CC	CC	CC	CC	CC	CC	CC	CC	CC	--	CC	CC	CC
Gm08_14646649_A_G	Gm08	14577038	AA	AA	AA	AA	AA	AA	AA	AA	AA	AA	AA	AA	AA	AA	AA	AA	AA	AA	AA	AA	AA	AA	AA	AA	AA	AA	AA	AA	AA	AA	AA	AA	AA	AA	AA	AA	AA	AA	AA	AA	AA	AA	AA	AA	AA	AA	AA
Gm08_14709181_C_A	Gm08	14639570	CC	CC	CC	CC	CC	CC	CC	CC	CC	CC	CC	CC	CC	CC	CC	CC	CC	CC	CC	CC	CC	CC	AC	CC	CC	CC	CC	CC	CC	CC	CC	CC	CC	CC	CC	CC	CC	CC	CC	CC	CC	CC	CC	AC	CC	CC	CC
Gm08_14781850_T_C	Gm08	14712827	TT	TT	TT	TT	TT	TT	TT	TT	TT	TT	TT	TT	TT	TT	TT	TT	TT	TT	TT	TT	TT	TT	TT	TT	TT	TT	TT	TT	TT	TT	TT	TT	TT	TT	TT	TT	TT	TT	TT	TT	TT	TT	TT	--	TT	TT	TT
Gm08_14833954_G_A	Gm08	14764913	GG	GG	GG	GG	GG	GG	GG	GG	GG	GG	GG	GG	GG	GG	GG	GG	GG	GG	GG	GG	GG	GG	GG	GG	GG	GG	GG	GG	GG	GG	GG	GG	GG	GG	GG	GG	GG	GG	GG	GG	GG	GG	GG	GG	GG	GG	GG
Gm08_15131577_A_G	Gm08	15062941	--	AA	--	GG	GG	GG	GG	AA	GG	GG	GG	AA	AA	AA	AA	--	GG	AG	GG	AA	GG	AG	GG	GG	AA	GG	AA	AA	AG	GG	GG	GG	GG	GG	GG	GG	AA	GG	--	AA	AG	GG	GG	GG	GG	AA	GG
Gm08_15153503_G_T	Gm08	15084953	TT	TT	TT	TT	TT	TT	TT	TT	TT	TT	TT	TT	TT	TT	TT	TT	TT	TT	TT	TT	TT	TT	TT	TT	TT	TT	TT	TT	TT	TT	TT	TT	TT	TT	TT	TT	TT	TT	TT	TT	TT	TT	TT	TT	TT	TT	TT
Gm08_15728680_T_C	Gm08	15645356	TC	CC	CC	TT	TT	TT	TT	CC	TT	TT	TT	CC	TT	CC	CC	TT	TT	TT	TT	CC	TT	TC	TT	TT	CC	TT	CC	CC	TC	TT	TT	TT	TT	TT	TT	TT	CC	TT	TT	CC	CC	TT	TT	TT	TT	CC	TT
Gm08_15829093_T_G	Gm08	15745785	GG	GG	GG	GG	GG	GG	GG	GG	GG	GG	GG	GG	GG	GG	GG	GG	GG	GG	GG	GG	GG	GG	GG	GG	GG	GG	GG	GG	GG	GG	GG	GG	GG	GG	GG	GG	GG	GG	GG	GG	GG	GG	GG	GG	GG	GG	GG
Gm08_15862930_A_C	Gm08	15780389	--	CC	AC	AA	AA	AA	AA	CC	AA	AA	AA	CC	AA	CC	CC	AA	AA	AA	AA	CC	AA	AC	AA	AA	CC	AA	CC	CC	AA	AA	AA	AA	AA	AA	AA	AA	CC	AA	--	CC	AC	AA	AA	AA	AA	CC	AA
Gm08_15928921_A_G	Gm08	15845309	AG	GG	GG	AA	AA	AA	AA	GG	AA	AA	AA	GG	AA	GG	GG	AA	AA	AA	AA	GG	AA	AG	AA	AA	GG	AA	GG	GG	AA	AA	AA	AA	AA	AA	AA	AA	GG	AA	--	GG	GG	AA	AA	AA	AA	GG	AA
Gm08_16170136_C_A	Gm08	16094804	AC	AA	AA	CC	CC	CC	CC	AA	CC	CC	CC	AA	CC	AA	AA	CC	CC	CC	CC	AA	CC	AA	CC	CC	AA	CC	AA	AA	CC	CC	CC	CC	CC	CC	CC	CC	AA	CC	--	AA	AA	CC	CC	CC	CC	AA	CC
Gm08_16256510_A_C	Gm08	16190177	--	CC	CC	AA	AA	AC	AA	CC	--	AC	AA	CC	AA	CC	CC	AA	AA	AC	AC	CC	AA	--	AC	AA	CC	AC	--	CC	AA	AA	--	AA	AA	AA	AA	CC	CC	AA	AC	CC	CC	AC	AC	AA	AA	CC	AA
Gm08_16516580_A_G	Gm08	16451124	AA	AA	AA	AA	AA	AA	AA	AA	AA	AA	AA	AA	AA	AA	AA	AA	AA	AA	AA	AA	AA	AA	AA	AA	AA	AA	AA	AA	AA	AA	AA	AA	AA	AA	AA	AA	AA	AA	AA	AA	AA	AA	AA	AA	AA	AA	AA
Gm08_16823465_A_C	Gm08	16757883	--	AA	AC	CC	CC	CC	CC	AA	CC	CC	CC	AA	CC	AA	AA	CC	CC	CC	CC	AA	AA	--	CC	CC	AA	AA	--	AA	CC	CC	CC	CC	CC	CC	CC	AA	AA	CC	--	AA	AC	AA	CC	--	CC	AA	CC
Gm08_16901934_C_T	Gm08	16836118	TC	CC	CC	TT	TT	TT	TT	CC	TT	TT	TT	CC	TT	CC	CC	TT	TT	TT	TT	CC	CC	TC	TT	TT	CC	CC	--	CC	TT	TT	TT	TT	TT	TT	TT	CC	CC	TT	TT	CC	CC	CC	TT	TT	TT	CC	TT
Gm08_16964379_T_C	Gm08	16898563	--	TT	TT	CC	CC	CC	CC	TT	CC	CC	CC	TT	CC	TT	TT	CC	CC	CC	CC	TT	TT	TC	CC	CC	TT	TT	TC	TT	CC	CC	CC	CC	CC	CC	CC	TT	TT	CC	CC	TT	TT	TT	CC	CC	CC	TT	CC
Gm08_17273651_T_C	Gm08	17207837	TC	TT	TT	CC	CC	CC	CC	TT	CC	CC	CC	TT	CC	TT	TT	CC	CC	CC	CC	TT	TT	TC	CC	CC	TT	TT	--	TT	CC	CC	CC	CC	CC	CC	CC	TT	TT	CC	CC	TT	TT	TT	CC	CC	CC	TT	CC
Gm08_17444010_T_G	Gm08	17378200	TG	TT	TT	GG	GG	GG	GG	TT	GG	GG	GG	TT	GG	TT	TT	GG	GG	GG	GG	TT	TT	TG	GG	GG	TT	TT	TG	GG	TG	GG	GG	GG	GG	GG	GG	TT	TT	GG	--	TT	TT	TT	GG	GG	GG	TT	GG
Gm08_17529249_G_T	Gm08	17464069	GG	GG	GG	GG	GG	GG	GG	GG	GG	GG	GG	GG	GG	GG	GG	GG	GG	GG	GG	GG	GG	GG	GG	GG	GG	GG	GG	GG	GG	GG	GG	GG	GG	GG	GG	GG	GG	GG	GG	GG	GG	GG	GG	--	GG	GG	GG
Gm08_17928709_C_T	Gm08	17864282	TT	TT	TT	TT	TT	TT	TT	TT	TT	TT	TT	TT	TT	TT	TT	TT	TT	TT	TT	TT	TT	TT	TT	TT	TT	TT	TT	TT	TT	TT	TT	TT	TT	TT	TT	TT	TT	TT	TT	TT	TT	TT	TT	TT	TT	TT	TT
Gm08_18101486_A_G	Gm08	18036698	--	--	AA	--	GG	AG	GG	AA	--	AG	GG	--	GG	AA	AA	GG	GG	--	--	AA	GG	--	GG	GG	AA	AA	AA	GG	--	GG	GG	GG	GG	GG	GG	AA	AA	GG	--	AA	AA	AA	GG	GG	GG	AA	GG
Gm08_18177939_C_T	Gm08	18113151	TC	TC	CC	TT	TT	--	TT	CC	TT	TT	TT	CC	TT	CC	CC	TT	TT	TC	TT	CC	TT	CC	TT	TT	CC	CC	CC	TT	--	TT	TT	TT	TT	TT	TT	CC	CC	TT	TT	CC	CC	CC	TT	TT	TT	CC	TT
Gm08_18379278_T_C	Gm08	18314214	TC	TC	TT	CC	CC	CC	CC	TT	CC	CC	CC	TT	CC	TT	TT	CC	CC	--	CC	TT	CC	TT	CC	CC	TT	TT	TT	CC	TT	CC	CC	TT	CC	CC	TT	TT	TT	CC	CC	TT	TT	TT	CC	CC	CC	TT	CC
Gm08_18626336_C_T	Gm08	18566925	TC	--	--	TT	TT	TT	TT	CC	TT	TT	TT	CC	TT	CC	CC	TT	TT	--	TT	CC	TT	TC	TT	TT	CC	CC	CC	TT	CC	TT	TT	CC	TT	TT	CC	CC	CC	TT	TT	CC	CC	CC	TT	TT	TT	CC	TT
Gm08_18748606_T_G	Gm08	18694242	TG	TG	TT	GG	GG	GG	GG	TT	GG	GG	GG	--	GG	TT	TT	GG	GG	TG	GG	TT	GG	TT	GG	GG	TT	TT	TT	GG	TT	GG	GG	TT	GG	GG	TT	TT	TT	GG	GG	TT	TT	TT	GG	GG	GG	TT	GG
Gm08_19117033_T_C	Gm08	19062988	TT	--	TC	TT	TT	TT	TT	CC	TT	TT	TT	TC	TT	CC	CC	TT	TT	--	TT	CC	TT	TC	TT	TT	CC	--	CC	TT	CC	TT	TT	CC	TT	TT	CC	CC	TT	TT	TT	CC	CC	CC	TT	TT	TT	TT	TT
Gm08_19162244_T_C	Gm08	19108199	TT	--	TC	TT	TT	TT	TT	CC	TT	TT	TT	TC	TT	CC	CC	TT	TT	--	TT	CC	TT	TC	TT	TT	CC	--	CC	TT	CC	TT	TT	CC	TT	TT	CC	CC	TT	TT	TT	CC	CC	CC	TT	TT	TT	TT	TT
Gm08_19226069_A_G	Gm08	19172024	AA	AG	GG	AA	AA	AA	AA	GG	AA	AA	AA	GG	AA	GG	GG	AA	AA	AG	AA	GG	AA	GG	AA	AA	GG	GG	GG	AA	GG	AA	AA	GG	AA	AA	GG	GG	AA	AA	AA	GG	GG	GG	AA	AA	AA	AA	AA
Gm08_19292385_T_C	Gm08	19249481	TT	TC	CC	TT	TT	TT	TT	CC	TT	TT	TT	CC	TT	CC	CC	TT	TT	TC	TT	CC	TT	CC	TT	TT	CC	CC	CC	TT	CC	TT	TT	CC	TT	TT	CC	CC	TT	TT	TT	CC	CC	CC	TT	TT	TT	TT	TT
Gm08_19414487_A_G	Gm08	19371483	AA	AG	GG	AA	AA	AA	AA	GG	AA	AA	AA	GG	AA	GG	GG	AA	AA	AG	AA	GG	AA	GG	AA	AA	GG	GG	GG	AA	GG	AA	AA	GG	AA	AA	GG	GG	AA	AA	AA	GG	GG	GG	AA	AA	AA	AA	AA
Gm08_19525771_A_G	Gm08	19482774	AA	--	AG	AA	AA	--	AA	GG	AA	AA	AA	--	AA	GG	GG	AA	AA	--	AA	GG	AA	AG	AA	AA	GG	GG	GG	AA	GG	AA	AA	GG	AA	AA	GG	GG	AA	AA	AA	GG	GG	GG	AA	AA	AA	AA	AA
Gm08_19635121_T_C	Gm08	19592124	TT	TC	CC	TT	TT	TT	TT	CC	TT	TT	TT	CC	TT	CC	CC	TT	TT	TC	TT	CC	TT	CC	TT	TT	CC	CC	CC	TT	CC	TT	TT	CC	TT	TT	CC	CC	TT	TT	TT	CC	CC	CC	TT	TT	TT	TT	TT
Gm08_19793746_C_T	Gm08	19750749	CC	--	TC	CC	CC	CC	CC	TT	CC	CC	--	--	CC	TT	TT	CC	CC	--	CC	TT	CC	TC	CC	CC	TT	--	TT	CC	TT	CC	--	TT	CC	CC	TT	TT	CC	CC	--	TT	TT	TT	CC	CC	CC	CC	CC
Gm08_19835719_T_G	Gm08	19793071	TT	TG	GG	TT	TT	TT	TT	GG	TT	TT	TT	GG	TT	GG	GG	TT	TT	--	TT	GG	TT	GG	TT	TT	GG	GG	GG	TT	GG	TT	TT	GG	GG	TT	GG	GG	TT	TT	TT	GG	GG	GG	TT	TG	TT	TT	TT
Gm08_19887196_G_A	Gm08	19844613	GG	--	AG	GG	GG	GG	GG	AA	GG	GG	GG	--	GG	AA	AA	GG	GG	--	GG	AA	GG	AA	GG	GG	AA	AA	AA	GG	AA	GG	GG	AA	AA	GG	AA	AA	GG	GG	GG	AA	AA	AA	GG	AG	GG	GG	GG
Gm08_20123542_G_A	Gm08	20081602	GG	AG	AA	GG	GG	GG	GG	AA	GG	GG	GG	AA	GG	AA	AA	GG	GG	AG	GG	AA	GG	AA	GG	GG	AA	AA	AA	GG	AA	GG	GG	AA	AA	GG	AA	AA	GG	GG	GG	AA	AA	AA	GG	--	GG	GG	GG
Gm08_20536534_C_T	Gm08	20493647	CC	TC	TT	CC	TT	CC	CC	TT	CC	CC	CC	TT	CC	TT	TT	CC	CC	TC	CC	TT	CC	TT	CC	CC	TT	TT	TT	TT	TT	CC	CC	TT	TT	CC	TT	TT	CC	CC	CC	TT	TT	TT	CC	--	CC	CC	CC
Gm08_21170988_C_T	Gm08	21127737	TT	TT	CC	TT	CC	TT	TT	CC	TT	TT	TT	--	TT	CC	CC	TT	TT	--	TT	CC	TT	CC	TT	TT	CC	CC	CC	CC	CC	CC	TT	CC	CC	TT	CC	CC	TT	TT	TT	CC	CC	CC	TT	CC	TT	TT	TT
Gm08_21362406_C_T	Gm08	21319155	CC	CC	CC	CC	CC	CC	CC	CC	CC	CC	CC	CC	CC	CC	CC	CC	CC	CC	CC	CC	CC	CC	CC	CC	CC	CC	CC	CC	CC	CC	CC	CC	CC	CC	CC	CC	CC	CC	CC	CC	CC	CC	CC	--	CC	CC	CC
Gm08_21933156_G_A	Gm08	21888120	GG	GG	AA	GG	AA	GG	GG	AA	GG	GG	GG	--	GG	AA	AA	GG	GG	AG	GG	AA	GG	AA	GG	GG	AA	AA	AA	AA	AA	AA	GG	AA	AA	GG	AA	AA	GG	GG	GG	AA	AA	AA	GG	AA	GG	GG	GG
Gm08_22013366_G_A	Gm08	21968675	GG	GG	AG	GG	AA	GG	GG	AA	GG	GG	GG	AG	GG	AA	AA	GG	GG	--	GG	AA	GG	AG	GG	GG	AA	AA	AA	AA	AA	AA	GG	AA	AA	GG	AA	AA	GG	GG	GG	AA	AA	AA	GG	AG	GG	GG	GG
Gm08_23245678_A_G	Gm08	23164827	GG	GG	GG	GG	GG	GG	GG	GG	GG	GG	GG	GG	GG	GG	GG	GG	GG	GG	GG	GG	GG	GG	GG	GG	GG	GG	GG	GG	GG	GG	GG	GG	GG	GG	GG	GG	GG	GG	GG	GG	GG	GG	GG	GG	GG	GG	GG
Gm08_23691942_G_A	Gm08	23614953	GG	GG	AG	GG	AA	GG	GG	AA	GG	GG	GG	--	GG	GG	AA	GG	GG	--	GG	GG	GG	AG	GG	GG	AA	AA	AA	AA	--	AA	GG	AA	AA	GG	AA	AA	AA	GG	GG	AA	AA	AA	GG	--	GG	AA	GG
Gm08_25518395_C_A	Gm08	25435928	CC	CC	AC	CC	AC	CC	CC	AC	CC	CC	CC	AA	CC	CC	--	CC	CC	--	CC	CC	CC	--	CC	CC	--	AC	AC	AC	--	AC	CC	AC	AC	CC	AC	AC	AC	CC	CC	AC	AC	AC	CC	--	CC	AC	CC
Gm08_27721821_G_A	Gm08	27620272	GG	GG	AG	GG	AA	GG	GG	AA	GG	GG	GG	--	GG	GG	AA	GG	GG	--	GG	GG	GG	AG	GG	GG	AA	AA	AA	AA	AG	AA	GG	AA	AA	GG	AA	AA	AA	GG	GG	AA	AA	AA	GG	AG	GG	AA	GG
Gm08_28027433_T_C	Gm08	27885824	TT	TT	CC	TT	CC	TT	TT	CC	TT	TT	TT	CC	TT	TT	CC	TT	TT	--	TT	TT	TT	CC	TT	TT	CC	CC	CC	CC	--	CC	TT	CC	CC	TT	CC	CC	CC	TT	TT	CC	CC	CC	TT	--	TT	CC	TT
Gm08_29497457_C_A	Gm08	30133773	CC	CC	--	CC	AA	CC	CC	AA	CC	CC	CC	--	CC	CC	AA	CC	CC	--	CC	CC	CC	AC	CC	CC	AA	AA	AA	AA	AC	AA	CC	AA	AA	CC	AA	AA	AA	CC	CC	AA	AA	AA	CC	AC	CC	AA	CC
Gm08_30225439_G_A	Gm08	30877366	AG	GG	AA	AG	AA	AG	GG	AA	GG	AG	AG	AA	GG	GG	AA	GG	GG	--	AG	GG	GG	AA	GG	GG	AA	AA	AA	AA	--	AA	GG	AA	AA	GG	AA	AA	AA	GG	AG	AA	AA	AA	--	--	GG	AA	GG
Gm08_34085111_C_T	Gm08	34690104	CC	CC	--	CC	TT	CC	CC	TT	CC	CC	CC	TT	CC	CC	TT	CC	CC	--	CC	CC	CC	TC	CC	CC	TT	TT	TT	TT	TC	TT	CC	TT	TT	CC	TT	TT	TT	CC	CC	TT	TT	TT	CC	TC	CC	TT	CC
Gm08_34506326_G_A	Gm08	35113908	AA	AA	AA	AA	AA	AA	AA	AA	AA	AA	AA	AA	AA	AA	AA	AA	AA	AA	AA	AA	AA	AA	AA	AA	AA	AA	AA	AA	AA	AA	AA	AA	AA	AA	AA	AA	AA	AA	AA	AA	AA	AA	AA	AA	AA	AA	AA
Gm08_35102127_G_A	Gm08	35718665	AA	AA	AA	AA	AA	AA	AA	AA	AA	AA	AA	AA	AA	AA	AA	AA	AA	AA	AA	AA	AA	AA	--	AA	AA	AA	AA	AA	AA	AA	AA	AA	AA	AA	AA	AA	AA	AA	AA	AA	AA	AA	AA	AA	AA	AA	AA
Gm08_35467148_T_C	Gm08	36075677	CC	CC	CC	CC	CC	CC	CC	CC	CC	CC	CC	CC	CC	CC	CC	CC	CC	CC	CC	CC	CC	CC	CC	CC	CC	CC	CC	CC	CC	CC	CC	CC	CC	CC	CC	CC	CC	CC	CC	CC	CC	CC	CC	CC	CC	CC	CC
Gm08_35664370_C_T	Gm08	36272305	TT	TT	TT	TT	TT	TT	TT	TT	TT	TT	TT	TT	TT	TT	TT	TT	TT	TT	TT	TT	TT	TT	TT	TT	TT	TT	TT	TT	TT	TT	TT	TT	TT	TT	TT	TT	TT	TT	TT	TT	TT	TT	TT	TT	TT	TT	TT
Gm08_35856368_C_A	Gm08	36466450	CC	CC	AC	CC	AA	--	CC	AA	CC	CC	CC	--	CC	CC	AA	CC	CC	--	CC	CC	CC	AC	CC	CC	AA	AA	AA	AA	AA	AA	CC	AA	AA	CC	AA	AA	AA	CC	CC	AA	AA	AA	CC	--	CC	AA	CC
Gm08_36324664_T_C	Gm08	36939282	TC	TT	CC	--	CC	TC	TT	CC	TT	--	--	--	TT	TT	CC	TT	TT	--	--	TT	TT	CC	TC	TT	CC	CC	CC	CC	CC	CC	TT	CC	CC	TT	CC	CC	CC	TT	--	CC	CC	CC	--	--	TT	CC	TT
Gm08_40303964_C_T	Gm08	40940261	TT	TT	TT	TT	TT	TT	TT	TT	TT	TT	TT	TT	TT	TT	TT	TT	TT	TT	TT	TT	TT	TT	TT	TT	TT	TT	TT	TT	TT	TT	TT	TT	TT	TT	TT	TT	TT	TT	TT	TT	TT	TT	TT	TT	TT	TT	TT
Gm08_40345085_C_A	Gm08	40981382	AA	AA	AA	AA	AA	AA	AA	AA	AA	AA	AA	AA	AA	AA	AA	AA	AA	AA	AA	AA	AA	AA	AA	AA	AA	AA	AA	AA	AA	AA	AA	AA	AA	AA	AA	AA	AA	AA	AA	AA	AA	AA	AA	AA	AA	AA	AA
Gm08_40401190_A_G	Gm08	41037487	GG	GG	GG	GG	GG	GG	GG	GG	GG	GG	GG	GG	GG	GG	GG	GG	GG	GG	GG	GG	GG	GG	GG	GG	GG	GG	GG	GG	GG	GG	GG	GG	GG	GG	GG	GG	GG	GG	GG	GG	GG	GG	GG	GG	GG	GG	GG
Gm08_40589333_T_C	Gm08	41225124	CC	CC	TC	CC	TT	CC	CC	TT	CC	CC	CC	TT	CC	CC	TT	CC	CC	CC	CC	TT	CC	TC	CC	CC	TT	TT	TT	TT	TT	TT	CC	TT	TT	CC	CC	TT	CC	CC	CC	TT	TT	TT	CC	TC	CC	CC	CC
Gm08_40735987_T_C	Gm08	41371777	CC	CC	--	CC	TT	CC	CC	TT	CC	CC	CC	TT	CC	CC	TT	CC	CC	CC	CC	TT	CC	TC	CC	CC	TT	TT	TT	TT	TT	TT	CC	TT	TT	CC	CC	TT	CC	CC	CC	TT	TT	TT	CC	TC	CC	CC	CC
Gm08_41126169_A_C	Gm08	41769114	CC	CC	AC	CC	AA	CC	CC	AA	CC	CC	CC	--	CC	AA	AA	CC	CC	CC	CC	AA	CC	AC	CC	CC	AA	AA	AA	AA	AA	AA	CC	AA	AA	CC	CC	AA	CC	CC	CC	AA	AA	CC	CC	AC	CC	CC	CC
Gm08_41191912_A_G	Gm08	41834095	GG	GG	AA	GG	AA	GG	GG	AA	GG	GG	GG	AA	GG	AA	AA	GG	GG	GG	GG	AA	GG	AA	GG	GG	AA	AA	AA	AA	AA	AA	GG	AA	AA	GG	GG	AA	GG	GG	GG	AG	AA	GG	GG	AG	GG	GG	GG
Gm08_41318101_A_G	Gm08	41960275	GG	GG	AG	GG	AA	GG	GG	AA	GG	GG	GG	AA	GG	AA	AA	GG	GG	GG	GG	AA	GG	AG	GG	GG	AA	AA	AA	AA	GG	AA	GG	AA	AA	GG	GG	AA	GG	GG	GG	--	AA	GG	GG	AG	GG	GG	GG
Gm08_41427473_A_G	Gm08	42069304	GG	GG	--	GG	AA	GG	GG	AA	GG	GG	GG	AA	GG	AA	AA	GG	GG	GG	GG	AA	GG	AG	GG	GG	AA	AA	AA	AA	GG	AA	GG	AA	AA	GG	GG	AA	GG	GG	GG	--	AA	GG	GG	AG	GG	GG	GG
Gm08_41504420_T_C	Gm08	42146252	CC	CC	TT	CC	TT	CC	CC	TT	CC	CC	CC	TT	CC	TT	TT	CC	CC	CC	CC	TT	CC	TT	CC	CC	TT	TT	TT	TT	CC	TT	CC	TT	TT	CC	CC	TT	CC	CC	CC	TC	TT	CC	CC	--	CC	CC	CC
Gm08_41798055_A_G	Gm08	42439047	GG	GG	AA	GG	AA	GG	GG	AA	AA	GG	GG	AA	AA	AA	AA	GG	AA	AG	GG	AA	GG	AA	GG	AA	AA	AA	AA	AA	GG	AA	GG	AA	AA	GG	AA	AA	GG	GG	GG	AG	AA	GG	GG	AG	GG	GG	GG
Gm08_41844881_T_C	Gm08	42485714	CC	TC	TT	CC	TT	CC	CC	TT	TT	CC	CC	TT	TT	TT	TT	CC	TT	TC	CC	TT	CC	TT	CC	TT	TT	TT	TT	TT	CC	TT	CC	TT	TT	CC	TT	TT	CC	CC	CC	--	TT	CC	CC	TC	CC	CC	CC
Gm08_42757127_T_G	Gm08	43583394	GG	GG	GG	GG	TT	GG	GG	TT	--	GG	GG	TT	TT	GG	GG	GG	TT	--	GG	GG	TT	TT	GG	TT	TT	TT	TT	TT	GG	TT	GG	TT	TT	GG	TT	GG	GG	GG	GG	TT	TT	GG	GG	--	GG	GG	GG
Gm08_42793022_A_G	Gm08	43619289	GG	GG	GG	GG	AA	GG	GG	AA	AA	GG	GG	AA	AA	GG	AA	GG	AA	AG	GG	GG	AA	AA	GG	AA	AA	AA	AA	AA	GG	AA	GG	AA	AA	GG	AA	GG	GG	GG	GG	AA	AA	GG	GG	AG	GG	GG	GG
Gm08_42859155_A_G	Gm08	43685137	GG	GG	GG	GG	AA	GG	GG	AA	AA	GG	GG	AA	AA	GG	AA	GG	AA	--	GG	GG	AA	AA	GG	AA	AA	AA	AA	AA	GG	AA	GG	AA	AA	GG	AA	GG	GG	GG	--	AA	AA	GG	GG	AG	GG	GG	GG
Gm08_42995552_G_A	Gm08	43821749	AA	AA	AA	AA	GG	AA	AA	GG	GG	AA	AA	GG	GG	AA	GG	AA	GG	--	AA	AA	GG	GG	AA	GG	GG	GG	GG	GG	AA	GG	AA	GG	GG	AA	GG	AA	AA	AA	AA	GG	GG	AA	AA	AG	AA	AA	AA
Gm08_43146859_G_T	Gm08	43981834	TT	TT	TT	TT	GG	TT	TT	GG	--	TT	TT	GG	GG	TT	GG	TT	GG	--	TT	TT	GG	GG	TT	--	GG	GG	GG	GG	TT	GG	TT	GG	GG	TT	GG	TT	TT	TT	TT	GG	GG	TT	TT	--	TT	TT	TT
Gm08_43345646_C_T	Gm08	44180613	TT	TT	TT	TT	CC	TT	TT	CC	--	TT	TT	CC	CC	TT	CC	TT	CC	--	TT	TT	CC	CC	TT	--	CC	CC	CC	CC	TT	CC	TT	CC	CC	TT	CC	TT	TT	TT	TT	CC	CC	TT	TT	--	TT	TT	TT
Gm08_43724738_C_A	Gm08	44559968	AA	AA	AA	AA	CC	AA	AA	AC	--	AA	AA	CC	CC	AA	CC	AA	CC	--	AA	AA	CC	CC	AA	--	CC	CC	CC	CC	AA	CC	AA	CC	CC	AA	CC	AA	AA	AA	AA	CC	CC	AA	AA	AC	AA	AA	AA
Gm08_43787988_G_A	Gm08	44623218	--	AA	AA	AA	GG	AA	AA	GG	GG	AA	AA	GG	GG	AA	GG	AA	GG	--	AA	AA	GG	GG	AA	GG	GG	GG	GG	GG	AA	GG	AA	GG	GG	AA	GG	AA	AA	AA	--	GG	GG	AA	AA	--	AA	AA	AA
Gm08_43896783_C_T	Gm08	44732011	TT	TT	TT	TT	CC	TT	TT	CC	CC	TT	TT	TT	CC	TT	CC	TT	CC	--	TT	TT	CC	CC	TT	CC	CC	CC	CC	CC	TT	CC	TT	CC	CC	TT	CC	TT	TT	TT	TT	CC	CC	TT	TT	CC	TT	TT	TT
Gm08_44087748_G_A	Gm08	44924890	AA	AA	AA	AA	GG	AA	AA	GG	GG	AA	AA	AA	GG	AA	GG	AA	GG	AG	AA	AA	GG	GG	AA	GG	GG	GG	GG	GG	AA	GG	AA	GG	GG	AA	GG	AA	AA	AA	AA	GG	GG	AA	AA	GG	AA	AA	AA
Gm08_44632488_A_G	Gm08	45140042	GG	GG	GG	GG	AA	GG	GG	AA	AA	GG	GG	GG	AA	GG	AA	GG	AA	AG	GG	GG	AA	AA	GG	AA	AA	AA	AA	AA	GG	AA	GG	AA	AA	GG	AA	GG	GG	GG	GG	AA	AA	GG	GG	AA	GG	GG	GG
Gm08_44422211_T_C	Gm08	45349709	CC	CC	CC	CC	TT	CC	CC	--	TT	CC	CC	CC	TT	CC	TT	CC	TT	--	CC	CC	TT	TT	TC	TT	TT	TT	TT	TT	CC	TT	CC	TT	TT	CC	TT	CC	CC	CC	CC	TT	TT	CC	CC	TC	CC	CC	CC
Gm08_44368268_A_G	Gm08	45403652	GG	GG	GG	GG	AA	GG	GG	AA	AA	GG	GG	GG	AA	GG	AA	GG	AA	AG	GG	GG	AA	AA	AA	AA	AA	AA	AA	AA	GG	AA	GG	AA	AA	GG	AA	GG	GG	GG	GG	AA	AA	GG	GG	AA	GG	GG	GG
Gm08_44814503_C_T	Gm08	45666704	TT	TT	TT	TT	CC	TT	TT	CC	CC	TT	TT	TT	CC	TT	CC	TT	CC	TC	TT	TT	CC	CC	CC	CC	CC	CC	CC	CC	TT	CC	TT	CC	CC	TT	CC	TT	TT	TT	TT	CC	CC	TT	TT	CC	TT	TT	TT
Gm08_45060561_C_T	Gm08	45913059	CC	CC	CC	CC	CC	CC	CC	CC	CC	CC	CC	CC	CC	CC	CC	CC	CC	CC	CC	CC	CC	CC	CC	CC	CC	CC	CC	CC	CC	CC	CC	CC	CC	CC	CC	CC	CC	CC	CC	CC	CC	CC	CC	CC	CC	CC	CC
Gm08_45317135_T_G	Gm08	46169650	TT	TT	TT	TT	TT	TT	TT	TT	TT	TT	TT	TT	TT	TT	TT	TT	TT	TT	TT	TT	TT	TT	TT	TT	TT	TT	TT	TT	TT	TT	TT	TT	TT	TT	TT	TT	TT	TT	TT	TT	TT	TT	TT	TT	TT	TT	TT
Gm08_45438731_T_C	Gm08	46291246	TT	TT	TT	TT	TT	TT	TT	TT	TT	TT	TT	TT	TT	TT	TT	TT	TT	TT	TT	TT	TT	TT	TT	TT	TT	TT	TT	TT	TT	TT	TT	TT	TT	TT	TT	TT	TT	TT	TT	TT	TT	TT	TT	TT	TT	TT	TT
Gm08_45541906_A_C	Gm08	46394422	CC	CC	CC	CC	AA	CC	CC	AC	AC	CC	CC	CC	AA	CC	AA	CC	AA	--	CC	CC	AA	AA	AC	AA	AA	AA	AA	AA	CC	AA	CC	AA	AA	CC	AA	CC	CC	CC	CC	CC	AA	CC	CC	AC	CC	CC	CC
Gm08_45590964_A_G	Gm08	46443480	GG	GG	GG	GG	AA	--	GG	--	AA	GG	GG	GG	AA	GG	AA	GG	AA	--	GG	GG	AA	AA	AG	AA	AA	AA	AA	AA	--	AA	GG	AA	AA	GG	AA	GG	GG	GG	--	GG	AA	GG	GG	AG	GG	GG	GG
Gm08_45697460_T_C	Gm08	46549976	CC	CC	CC	CC	TT	CC	CC	TC	--	CC	CC	CC	TT	CC	TT	CC	TT	--	CC	CC	TT	TT	TC	TT	TT	TT	CC	TT	CC	TT	CC	TT	TT	CC	TT	CC	CC	CC	CC	CC	TT	CC	CC	TC	CC	CC	CC
Gm08_45808855_C_T	Gm08	46659893	TT	TT	TT	TT	CC	TT	TT	CC	CC	TT	TT	TT	CC	TT	CC	TT	CC	TC	TT	TT	CC	CC	CC	CC	CC	CC	TT	CC	TT	CC	TT	CC	CC	TT	CC	TT	TT	TT	TT	TT	CC	TT	TT	CC	TT	TT	TT
Gm08_45846181_A_G	Gm08	46697219	GG	GG	GG	GG	AA	GG	GG	--	AA	GG	GG	GG	AA	GG	AA	GG	AA	--	GG	GG	AA	AA	AG	AA	AA	AA	GG	AA	GG	AA	GG	AA	AA	GG	AA	GG	GG	GG	GG	GG	AA	GG	GG	AG	GG	GG	GG
Gm08_45893888_T_C	Gm08	46744926	CC	CC	CC	CC	TT	CC	CC	--	TT	CC	CC	CC	TT	CC	TT	CC	TT	--	CC	CC	TT	TT	TC	TT	TT	TT	CC	TT	CC	TT	CC	TT	TT	CC	TT	CC	CC	CC	CC	CC	TT	CC	CC	TC	CC	CC	CC
Gm08_45981724_G_A	Gm08	46832876	GG	GG	GG	GG	GG	GG	GG	GG	GG	GG	GG	GG	GG	GG	GG	GG	GG	GG	GG	GG	GG	GG	GG	GG	GG	GG	GG	GG	GG	GG	GG	GG	GG	GG	GG	GG	GG	GG	GG	GG	GG	GG	GG	GG	GG	GG	GG
Gm08_46022059_A_G	Gm08	46873906	AA	AA	AA	AA	AA	AA	AA	AA	AA	AA	AA	AA	AA	AA	AA	AA	AA	AA	AA	AA	AA	AA	AA	AA	AA	AA	AA	AA	AA	AA	AA	AA	AA	AA	AA	AA	AA	AA	AA	AA	AA	AA	AA	AA	AA	AA	AA
Gm08_46188257_A_C	Gm08	47040104	CC	AC	CC	CC	AA	CC	CC	AA	AA	CC	CC	CC	AA	CC	AA	CC	AA	AC	CC	CC	AA	AA	AA	AA	AA	AA	CC	AA	AC	AA	CC	AA	AA	CC	AA	CC	CC	CC	CC	CC	AA	CC	CC	AA	CC	CC	CC
Gm08_46434966_G_T	Gm08	47286262	TT	TG	TT	TT	GG	--	TT	GG	GG	TT	TT	TT	GG	GG	GG	TG	GG	TG	TT	TT	GG	GG	GG	GG	GG	GG	TT	GG	TG	GG	TT	GG	GG	TT	GG	TT	TT	TT	--	TT	GG	GG	TT	--	TT	TT	TT
Gm08_46804090_A_G	Gm08	47655267	AA	AA	AA	AA	AA	AA	AA	AA	AA	AA	AA	AA	AA	AA	AA	AA	AA	AA	AA	AA	AA	AA	AA	AA	AA	AA	AA	AA	AA	AA	AA	AA	AA	AA	AA	AA	AA	AA	AA	AA	AA	AA	AA	AA	AA	AA	AA
Gm08_46881874_G_A	Gm08	47733111	GG	GG	GG	GG	GG	GG	GG	GG	GG	GG	GG	GG	GG	GG	GG	GG	GG	GG	GG	GG	GG	GG	GG	GG	GG	GG	GG	GG	GG	GG	GG	GG	GG	GG	GG	GG	GG	GG	GG	GG	GG	GG	GG	GG	GG	GG	GG
Gm09_104404_T_C	Gm09	106196	CC	CC	CC	CC	CC	CC	CC	CC	CC	CC	CC	CC	CC	CC	CC	CC	CC	CC	CC	CC	CC	CC	CC	CC	CC	CC	CC	CC	CC	CC	CC	CC	CC	CC	CC	CC	CC	CC	CC	CC	CC	CC	CC	--	CC	CC	CC
Gm09_413274_G_A	Gm09	415069	GG	GG	GG	GG	GG	GG	GG	GG	GG	GG	GG	GG	GG	GG	GG	GG	GG	GG	GG	GG	GG	GG	GG	GG	GG	GG	GG	GG	GG	GG	GG	GG	GG	GG	GG	GG	GG	GG	GG	GG	GG	GG	GG	GG	GG	GG	GG
Gm09_439265_T_C	Gm09	441060	CC	--	TT	TT	CC	CC	TT	TT	--	TT	TT	CC	CC	CC	CC	CC	TT	CC	CC	TT	CC	CC	CC	CC	CC	TT	--	TT	CC	CC	TT	TT	TT	TT	CC	TT	CC	TT	TC	CC	TT	CC	TT	TC	TT	CC	TT
Gm09_611923_A_G	Gm09	613726	GG	GG	GG	GG	GG	GG	GG	GG	GG	GG	GG	GG	GG	GG	GG	GG	GG	GG	GG	GG	GG	GG	GG	GG	GG	GG	GG	GG	GG	GG	GG	GG	GG	GG	GG	GG	GG	GG	GG	GG	GG	GG	GG	GG	GG	GG	GG
Gm09_720803_C_T	Gm09	722588	CC	CC	CC	CC	CC	CC	CC	CC	CC	CC	CC	CC	CC	CC	CC	CC	CC	CC	CC	CC	CC	CC	CC	CC	CC	CC	CC	CC	CC	CC	CC	CC	CC	CC	CC	CC	CC	CC	CC	CC	CC	CC	CC	CC	CC	CC	CC
Gm09_886505_T_C	Gm09	888248	TT	CC	CC	TT	TT	TT	CC	CC	CC	CC	TT	TT	CC	TT	TT	TT	CC	TT	TT	CC	TT	--	TT	TT	TT	CC	TT	CC	TT	TT	TT	CC	CC	CC	TT	CC	TT	CC	--	TT	CC	TT	CC	CC	CC	TT	CC
Gm09_1111460_T_C	Gm09	1126171	CC	CC	CC	CC	CC	CC	CC	CC	CC	CC	CC	CC	CC	CC	CC	CC	CC	CC	CC	CC	CC	CC	CC	CC	CC	CC	CC	CC	CC	CC	CC	CC	CC	CC	CC	CC	CC	CC	CC	CC	CC	CC	CC	CC	CC	CC	CC
Gm09_1162832_G_A	Gm09	1177685	AA	AA	AA	AA	AA	AA	AA	AA	AA	AA	AA	AA	AA	AA	AA	AA	AA	AA	AA	AA	AA	AA	AA	AA	AA	AA	AA	AA	AA	AA	AA	AA	AA	AA	AA	AA	AA	AA	AA	AA	AA	AA	AA	AA	AA	AA	AA
Gm09_1251128_T_C	Gm09	1265980	TT	CC	CC	TT	TT	TT	CC	CC	CC	CC	TT	TT	CC	TC	TT	TT	TT	TT	TT	CC	TT	TC	TT	TT	TT	CC	TT	CC	TT	TT	TT	CC	CC	CC	TT	CC	TT	CC	TC	TT	CC	CC	CC	CC	CC	TT	CC
Gm09_1320051_G_A	Gm09	1334941	GG	AA	AA	GG	GG	GG	AA	AA	AA	AA	GG	GG	AA	AG	GG	GG	GG	GG	GG	AA	GG	AG	--	GG	GG	AA	GG	AA	GG	GG	GG	AA	AA	AA	GG	AA	GG	AA	AG	GG	AA	AA	AA	AA	AA	GG	--
Gm09_1397467_C_T	Gm09	1412357	TT	TT	TT	TT	TT	TT	TT	TT	TT	TT	TT	TT	TT	TT	TT	TT	TT	TT	TT	TT	TT	TT	TT	TT	TT	TT	TT	TT	TT	TT	TT	TT	TT	TT	TT	TT	TT	TT	TT	TT	TT	TT	TT	TT	TT	TT	TT
Gm09_1458776_C_T	Gm09	1473666	CC	TC	TT	CC	CC	CC	TT	--	--	TT	CC	CC	TT	CC	CC	CC	CC	CC	CC	TT	CC	CC	CC	--	CC	TT	CC	TT	CC	CC	CC	TT	TT	TT	TT	TT	CC	TC	CC	CC	TT	TC	TT	TC	TT	CC	TC
Gm09_2327785_G_A	Gm09	2342864	AG	GG	GG	GG	GG	GG	GG	AG	AG	GG	GG	GG	AG	AG	GG	GG	GG	--	GG	GG	GG	--	GG	AG	GG	GG	GG	GG	--	GG	--	AG	AG	GG	AG	GG	GG	GG	GG	GG	GG	AG	GG	AG	GG	GG	GG
Gm09_2386432_G_A	Gm09	2401511	AA	GG	GG	GG	GG	GG	GG	AA	AA	GG	GG	GG	AA	AA	GG	GG	GG	GG	GG	GG	GG	GG	GG	AA	GG	GG	GG	GG	GG	GG	GG	AA	AA	GG	AA	GG	GG	GG	GG	GG	GG	AA	GG	AA	GG	GG	GG
Gm09_2685308_G_A	Gm09	2708833	AA	AA	AA	GG	GG	GG	GG	AA	AA	GG	GG	GG	AA	AA	GG	GG	GG	GG	GG	AG	GG	GG	GG	AA	GG	AA	GG	GG	AA	GG	GG	AA	AA	GG	AA	AA	GG	GG	GG	GG	AA	AA	GG	--	GG	GG	GG
Gm09_2784336_T_G	Gm09	2824832	TG	TG	TG	GG	GG	GG	GG	TG	TT	GG	GG	GG	TT	TT	GG	GG	GG	GG	GG	GG	TT	GG	GG	--	GG	TT	GG	GG	TT	GG	GG	TT	TT	GG	TT	TT	GG	GG	GG	GG	TT	TG	GG	--	GG	GG	GG
Gm09_2926870_T_C	Gm09	2967367	CC	CC	CC	CC	CC	CC	CC	CC	CC	CC	CC	CC	CC	CC	CC	CC	CC	CC	CC	CC	CC	CC	CC	CC	CC	CC	CC	CC	CC	CC	CC	CC	CC	CC	CC	CC	CC	CC	CC	CC	CC	CC	CC	CC	CC	CC	CC
Gm09_2976373_A_G	Gm09	3016870	GG	GG	GG	GG	GG	GG	GG	GG	GG	GG	GG	GG	GG	GG	GG	GG	GG	GG	GG	GG	GG	GG	GG	GG	GG	GG	GG	GG	GG	GG	GG	GG	GG	GG	GG	GG	GG	GG	GG	GG	GG	GG	GG	GG	GG	GG	GG
Gm09_3101824_A_G	Gm09	3142293	AA	AA	AA	AA	AA	AA	AA	AA	AA	AA	AA	AA	AA	AA	AA	AA	AA	AA	AA	AA	AA	AA	AA	AA	AA	AA	AA	AA	AA	AA	AA	AA	AA	AA	AA	AA	AA	AA	AA	AA	AA	AA	AA	AA	AA	AA	AA
Gm09_3174245_A_G	Gm09	3215569	GG	AA	AA	AA	AA	AG	AA	GG	GG	--	AA	--	GG	GG	AA	AA	AA	AG	AA	AA	GG	AG	AA	GG	AA	AA	GG	AA	AG	AA	AA	GG	GG	AA	GG	AA	AA	AA	AA	AA	AA	GG	AA	--	AA	AA	AA
Gm09_3420354_T_C	Gm09	3461540	CC	TT	TT	TT	TT	TC	TT	CC	CC	TT	TT	--	CC	CC	TT	TT	TT	--	TT	TT	CC	TC	--	CC	TT	TT	TT	TC	TC	CC	TC	CC	CC	TT	CC	TT	TT	TT	TT	TT	TT	CC	TT	--	TT	TT	TT
Gm09_3570585_A_C	Gm09	3612769	AA	AA	AA	AA	AA	AA	AA	AA	AA	AA	AA	AA	AA	AA	AA	AA	AA	AA	AA	AA	AA	AA	AA	AA	AA	AA	AA	AA	AA	AA	AA	AA	AA	AA	AA	AA	AA	AA	AA	AA	AA	AA	AA	AA	AA	AA	AA
Gm09_3708901_T_C	Gm09	3751124	TT	CC	CC	CC	CC	CC	CC	TT	TT	CC	CC	CC	TT	TT	CC	CC	CC	CC	CC	CC	TT	CC	TC	TT	CC	CC	CC	CC	CC	TT	CC	TT	TT	CC	TT	CC	CC	CC	CC	CC	CC	TT	CC	TC	CC	CC	CC
Gm09_3807440_T_C	Gm09	3849618	TT	TT	TT	TT	TT	TT	TT	TT	TT	TT	TT	TT	TT	TT	TT	TT	TT	TT	TT	TT	TT	TT	TT	TT	TT	TT	TT	TT	TT	TT	TC	TT	TT	TT	TT	TT	TT	TT	TT	TT	TT	TT	TT	TT	TT	TT	TT
Gm09_3886229_C_T	Gm09	3928746	CC	CC	CC	CC	CC	CC	CC	CC	CC	CC	CC	CC	CC	CC	CC	CC	CC	CC	CC	CC	CC	CC	CC	CC	CC	CC	CC	CC	CC	CC	CC	CC	CC	CC	CC	CC	CC	CC	CC	CC	CC	CC	CC	CC	CC	CC	CC
Gm09_3934271_C_T	Gm09	3976795	CC	CC	CC	CC	CC	CC	CC	CC	CC	CC	CC	CC	CC	CC	CC	CC	CC	CC	CC	CC	CC	CC	CC	CC	CC	CC	CC	CC	CC	CC	CC	CC	CC	CC	CC	CC	CC	CC	CC	CC	CC	CC	CC	CC	CC	CC	CC
Gm09_4152772_G_A	Gm09	4195294	AA	AA	AG	GG	GG	GG	GG	AA	AA	GG	GG	GG	GG	GG	GG	GG	GG	--	GG	AA	AA	AG	--	AA	GG	AA	GG	GG	AA	AA	GG	AA	AA	GG	AA	GG	GG	GG	--	GG	AA	AA	GG	--	GG	GG	GG
Gm09_4245412_T_C	Gm09	4288028	TT	TT	TC	CC	CC	CC	CC	TT	TT	CC	CC	CC	CC	CC	CC	CC	CC	CC	CC	TT	TT	--	--	TT	CC	TT	CC	CC	TT	TT	CC	TT	TT	CC	TT	CC	CC	CC	--	CC	TT	TT	CC	--	CC	CC	CC
Gm09_4354636_C_T	Gm09	4397300	CC	CC	--	TT	TT	--	TT	CC	CC	TT	TT	TT	TT	TT	TT	TT	TT	--	TT	CC	CC	TC	--	CC	TT	CC	TT	TT	CC	CC	TT	CC	CC	TT	CC	TT	TT	TT	TC	TT	CC	CC	TT	--	TT	TT	TT
Gm09_4404144_C_T	Gm09	4446465	TT	TT	TT	TT	TT	TT	TT	TT	TT	TT	TT	TT	TT	TT	TT	TT	TT	TT	TT	TT	TT	TT	TT	TT	TT	TT	TT	TT	TT	TT	TT	TT	TT	TT	TT	TT	TT	TT	TT	TT	TT	TT	TT	TT	TT	TT	TT
Gm09_4517002_T_C	Gm09	4559273	CC	CC	TC	TT	TT	TT	TT	CC	CC	TT	TT	TT	TT	TT	TT	TT	TT	TT	TT	CC	CC	TT	TC	CC	TT	CC	TT	TT	--	CC	TT	CC	CC	TT	CC	TT	TT	TT	TT	CC	CC	CC	TT	TC	TT	TT	TT
Gm09_4799335_A_C	Gm09	4842514	AC	AC	--	CC	CC	CC	CC	AC	--	CC	CC	CC	CC	CC	CC	CC	CC	CC	AC	AA	AA	CC	--	--	CC	AC	CC	CC	--	AA	CC	AA	AA	CC	AA	CC	CC	CC	CC	AA	AA	CC	CC	--	CC	CC	CC
Gm09_4991159_G_A	Gm09	5040021	GG	GG	--	AA	AA	AG	AA	GG	GG	AA	AA	AA	AA	AA	AA	AA	AA	AG	GG	GG	GG	AG	--	GG	AA	GG	AA	AA	--	GG	--	GG	GG	AA	GG	--	AA	AA	AG	GG	GG	--	AA	--	AA	AA	AA
Gm09_5016500_C_T	Gm09	5065362	TT	TT	TT	TT	TT	TT	TT	TT	TT	TT	TT	TT	TT	TT	TT	TT	TT	TT	TT	TT	TT	TT	TT	TT	TT	TT	TT	TT	TT	TT	TT	TT	TT	TT	TT	TT	TT	TT	TT	TT	TT	TT	TT	--	TT	TT	TT
Gm09_5038550_T_G	Gm09	5087412	GG	GG	GG	GG	GG	GG	GG	GG	GG	GG	GG	GG	GG	GG	GG	GG	GG	GG	GG	GG	GG	GG	GG	GG	GG	GG	GG	GG	GG	GG	GG	GG	GG	GG	GG	GG	GG	GG	GG	GG	GG	GG	GG	--	GG	GG	GG
Gm09_5122231_A_G	Gm09	5171096	GG	GG	GG	GG	GG	GG	GG	GG	GG	GG	GG	GG	GG	GG	GG	GG	GG	GG	GG	GG	GG	GG	GG	GG	GG	GG	GG	GG	GG	GG	GG	GG	GG	GG	GG	GG	GG	GG	GG	GG	GG	GG	GG	GG	GG	GG	GG
Gm09_5345445_A_G	Gm09	5388260	AA	AA	AA	AA	AA	AA	AA	AA	AA	AA	AA	AA	AA	AA	AA	AA	AA	AA	AA	AA	AA	AA	AA	AA	AA	AA	AA	AA	AA	AA	AG	AA	AA	AA	AA	AA	AA	AA	AA	AA	AA	AA	AA	AG	AA	AA	AA
Gm09_5514307_C_T	Gm09	5557122	CC	CC	--	TT	TT	--	TT	CC	CC	TT	TT	TT	TT	CC	TT	TT	TT	CC	CC	CC	CC	TC	--	CC	TT	CC	TT	TT	TC	CC	TT	CC	CC	TT	CC	TT	TT	TT	TC	CC	CC	CC	TT	--	TT	TT	TT
Gm09_5799228_A_C	Gm09	5842041	--	AA	--	CC	CC	AC	CC	AA	AA	--	CC	CC	CC	AA	CC	CC	CC	AA	AA	AA	AA	AC	--	AA	CC	AA	AA	CC	AC	AA	CC	AA	AA	CC	AA	CC	CC	CC	AC	AA	AA	AA	CC	--	CC	CC	CC
Gm09_5979646_C_T	Gm09	6027763	CC	TT	TT	TT	TT	TC	TT	CC	CC	--	TT	TT	TT	CC	TT	TT	TT	CC	CC	TT	CC	TT	--	CC	TT	TT	CC	TT	TC	CC	TT	CC	TT	TT	CC	TT	TT	TT	TT	TT	TT	CC	--	TT	TT	TT	TT
Gm09_6030925_A_C	Gm09	6079042	AC	CC	CC	CC	CC	CC	CC	AC	AA	CC	CC	CC	CC	AA	CC	CC	CC	AA	--	CC	AA	CC	--	AC	CC	CC	AA	CC	--	AA	CC	AA	CC	CC	AA	CC	CC	CC	CC	CC	CC	AC	CC	CC	CC	CC	CC
Gm09_6197309_G_A	Gm09	6155810	AG	GG	GG	GG	GG	GG	GG	AG	AA	GG	GG	GG	GG	AA	GG	GG	GG	AA	AG	GG	AA	GG	--	AG	GG	GG	AA	GG	GG	AA	GG	AA	GG	GG	AA	GG	GG	GG	GG	GG	GG	AG	GG	GG	GG	GG	GG
Gm09_6352861_T_C	Gm09	6311012	CC	TT	TT	TT	CC	TT	TT	CC	CC	TT	TT	TT	TT	CC	TT	TT	TT	CC	CC	TT	CC	TT	--	CC	TT	TT	CC	TT	TT	CC	TT	CC	TT	TT	CC	TT	TT	TT	TT	TT	TT	CC	TT	TT	TT	TT	TT
Gm09_7595772_G_T	Gm09	7558621	GG	--	--	TT	GG	TT	TT	GG	GG	TT	TT	--	TT	GG	GG	GG	TT	GG	GG	GG	GG	TT	TG	GG	TT	TT	GG	TT	--	GG	TT	GG	TT	TT	GG	TT	TT	TT	TT	TT	--	GG	TT	TT	TT	TT	TT
Gm09_8984771_A_G	Gm09	8934741	AG	GG	GG	GG	AG	GG	GG	AG	AG	GG	GG	GG	GG	AG	GG	GG	GG	AG	AG	GG	AG	GG	--	AG	GG	GG	AG	GG	GG	AG	GG	AG	GG	GG	AG	GG	GG	GG	GG	GG	GG	AG	GG	GG	GG	GG	GG
Gm02_24460388_G_T	Gm09	13752580	TT	TT	TT	TT	TT	TT	TT	TT	TT	TT	TT	TT	TT	TT	TT	TT	TT	TT	TT	TT	TT	TT	TT	TT	TT	TT	TT	TT	TT	TT	TT	TT	TT	TT	TT	TT	TT	TT	TT	TT	TT	TT	TT	TT	TT	TT	TT
Gm09_14923108_C_A	Gm09	15487393	CC	AC	AC	AA	CC	AA	AA	AA	AA	AA	AA	CC	AA	CC	CC	CC	AA	CC	CC	CC	CC	AA	AC	AA	AA	AA	CC	AA	CC	CC	AA	AA	AA	AA	AA	AA	AA	AA	AA	AA	AC	CC	AA	AA	AA	AA	AA
Gm09_18223900_A_G	Gm09	18833586	AA	AG	--	GG	AA	GG	GG	GG	GG	GG	GG	AA	GG	AA	AA	AA	GG	AA	AA	AA	AA	GG	AG	GG	GG	GG	AA	GG	AA	AA	GG	GG	GG	GG	GG	GG	GG	GG	GG	GG	AG	AA	GG	GG	GG	GG	GG
Gm09_18710874_C_A	Gm09	19320910	--	AC	AC	AA	CC	AA	AA	AA	AA	AA	AA	CC	AA	CC	CC	CC	AA	CC	CC	CC	CC	AA	--	AA	AA	AA	CC	AA	CC	CC	AA	AA	AA	AA	AA	AA	AA	AA	AA	AA	AC	CC	AA	AA	AA	AA	AA
Gm09_18799217_G_A	Gm09	19409253	--	--	--	AA	GG	AA	AA	AA	AA	AA	AA	AG	AA	GG	GG	GG	AA	GG	GG	GG	GG	AA	AG	AA	AA	AA	GG	AA	GG	GG	AA	AA	AA	AA	AA	AA	AA	AA	AA	AA	--	GG	AA	AA	AA	AA	AA
Gm09_19823605_G_A	Gm09	21080454	AG	--	--	AA	AG	AA	AA	AA	AG	AA	AA	GG	AA	AG	AG	AG	AA	--	AG	AG	AG	AA	AG	AG	AA	AA	AG	AA	AG	AG	AA	AG	AA	AA	AG	AA	AA	AA	AA	AA	--	AG	AA	AA	AA	AA	AA
Gm09_22305708_G_T	Gm09	25766065	GG	--	--	TT	GG	TT	TT	TT	GG	TT	TT	--	TT	GG	GG	--	TT	GG	GG	GG	GG	TT	TG	GG	TT	TT	GG	TT	GG	GG	TT	GG	TT	TT	GG	TT	TT	TT	TT	TT	TG	GG	TT	TT	TT	TT	TT
Gm09_27092089_A_G	Gm09	29576509	GG	GG	GG	GG	GG	--	GG	GG	AA	GG	GG	GG	GG	GG	GG	GG	GG	GG	GG	GG	GG	GG	GG	AA	GG	GG	GG	GG	GG	GG	GG	GG	GG	GG	GG	GG	GG	GG	GG	GG	GG	GG	GG	GG	GG	GG	GG
Gm09_29782119_G_A	Gm09	32388671	AA	AG	--	GG	AA	GG	GG	GG	GG	GG	GG	AA	GG	AA	AA	AA	GG	AA	AA	AA	AA	GG	AG	GG	GG	GG	AA	GG	AA	AA	GG	GG	GG	GG	GG	GG	GG	GG	GG	GG	AG	AA	GG	GG	GG	GG	GG
Gm09_30089678_T_C	Gm09	32695242	--	--	--	TT	CC	TT	TT	CC	CC	TT	TT	TC	TT	CC	CC	TC	TT	CC	--	CC	CC	TT	--	--	TT	TT	CC	TT	CC	CC	TT	TT	TT	TT	TT	TT	TT	TT	TT	TT	--	--	TT	TT	TT	TT	TT
Gm09_31217330_T_C	Gm09	33843724	TT	TC	TC	CC	TT	CC	CC	TT	TT	CC	CC	TT	CC	TT	TT	TT	CC	TT	TT	TT	TT	CC	TC	TT	CC	CC	TT	CC	TT	TT	CC	CC	CC	CC	CC	CC	CC	CC	CC	CC	CC	TT	CC	CC	CC	CC	CC
Gm09_32382867_G_T	Gm09	34972748	GG	--	TT	TT	GG	--	TT	GG	GG	TT	TT	GG	TT	GG	GG	GG	TT	GG	GG	GG	GG	TT	--	GG	TT	TT	GG	TT	GG	GG	--	TT	TT	TT	TT	TT	TT	TT	TT	TT	TG	GG	TT	TT	TT	TT	TT
Gm09_32987730_G_A	Gm09	35591012	GG	--	AA	AA	GG	AA	AA	GG	GG	AA	AA	GG	AA	GG	GG	GG	AA	GG	GG	GG	GG	AA	AG	GG	AA	AA	GG	AA	GG	GG	AA	AA	AA	AA	AA	AA	AA	AA	AA	AA	AA	GG	AA	AA	AA	AA	AA
Gm09_33313292_T_G	Gm09	35916459	TG	--	GG	GG	TT	GG	GG	TG	TT	GG	GG	TG	GG	TT	TT	TG	GG	TT	TG	TT	TT	GG	--	TT	GG	GG	TT	GG	TG	TT	GG	GG	GG	GG	GG	GG	GG	GG	GG	GG	GG	TG	GG	GG	GG	GG	GG
Gm09_33624152_T_C	Gm09	36224352	TT	--	CC	CC	TT	--	CC	TT	TT	CC	CC	TC	CC	TT	TT	TT	CC	TT	TT	TT	TT	CC	--	TT	CC	CC	TT	CC	--	TT	--	CC	CC	CC	CC	CC	CC	CC	--	CC	TC	TT	CC	--	CC	CC	CC
Gm09_33894091_A_C	Gm09	36455035	AA	CC	CC	CC	AA	CC	CC	AA	AA	CC	CC	AA	CC	AA	AA	AA	CC	AA	AA	AA	AA	CC	AC	AA	CC	CC	AA	CC	AA	AA	CC	CC	CC	CC	CC	CC	CC	CC	CC	CC	CC	AA	CC	CC	CC	CC	CC
Gm09_34354926_C_T	Gm09	36916485	--	CC	CC	CC	TT	--	CC	--	TT	CC	CC	TC	CC	TT	TT	--	CC	TT	--	TT	TT	TC	TC	--	CC	CC	TC	CC	--	TT	--	CC	CC	CC	CC	CC	CC	CC	CC	CC	--	--	CC	CC	CC	CC	CC
Gm09_34830637_A_G	Gm09	37391443	GG	GG	GG	GG	GG	GG	GG	AA	AA	GG	GG	GG	GG	GG	GG	GG	GG	GG	GG	GG	GG	--	GG	AA	GG	GG	GG	GG	GG	GG	GG	GG	GG	GG	GG	GG	GG	GG	GG	GG	GG	GG	GG	GG	GG	GG	GG
Gm09_35962679_T_C	Gm09	38523430	TC	CC	CC	TT	TT	CC	TT	TC	TT	TT	TT	CC	CC	TT	TT	CC	CC	TT	TC	TT	TT	--	TT	TT	TT	CC	TT	TT	--	TT	TT	CC	CC	CC	CC	CC	TT	TT	TT	TT	CC	TT	TT	--	TT	TT	TT
Gm09_36305321_T_C	Gm09	38864545	--	CC	CC	TT	TT	CC	TT	TT	TT	TT	TT	CC	CC	TT	TT	CC	CC	TT	TT	TT	TT	CC	TT	TT	TT	CC	TT	TT	--	TT	TT	CC	CC	CC	CC	CC	TT	TT	TT	TT	CC	TT	TT	CC	TT	TT	TT
Gm09_36486860_T_C	Gm09	39047264	CC	CC	CC	TT	CC	CC	TT	CC	CC	TT	TT	CC	CC	CC	CC	CC	CC	CC	CC	CC	CC	CC	TC	CC	CC	CC	TC	--	CC	CC	TC	CC	CC	CC	CC	CC	TT	TT	TC	CC	CC	CC	TT	--	TT	TT	TT
Gm09_36666374_A_C	Gm09	39239605	CC	CC	CC	AA	CC	CC	AA	CC	CC	AA	AA	CC	CC	CC	CC	CC	CC	CC	CC	CC	CC	CC	AC	CC	CC	CC	AC	--	CC	CC	AC	CC	CC	CC	CC	CC	AA	AA	AC	CC	CC	CC	AA	CC	AA	AA	--
Gm09_36784974_C_T	Gm09	39358464	TT	TT	TC	CC	TT	TT	CC	TT	TT	CC	CC	TT	TT	TT	TT	TC	TT	TT	TT	TT	TT	TT	CC	--	TT	TT	--	--	TC	TT	CC	TT	TT	TT	TT	TT	CC	CC	CC	TT	TT	TT	CC	TC	CC	CC	CC
Gm09_36844563_T_C	Gm09	39418052	TT	CC	CC	TT	TT	CC	TT	CC	CC	TT	TT	CC	CC	TT	CC	CC	CC	TT	TT	CC	TT	CC	TT	CC	TT	CC	TT	TT	CC	TT	TT	CC	CC	CC	CC	CC	TT	TT	TT	TT	CC	TT	TT	CC	TT	TT	TT
Gm09_36869408_A_C	Gm09	39443085	CC	CC	CC	AA	CC	CC	AA	CC	CC	AA	AA	CC	CC	CC	CC	--	CC	CC	CC	CC	CC	CC	AA	CC	CC	CC	AC	AC	CC	CC	AA	CC	CC	CC	CC	CC	AA	AA	AA	CC	CC	CC	AA	--	AA	AA	AA
Gm09_36946741_A_G	Gm09	39520644	GG	AA	AA	AA	GG	AA	AA	AA	AA	AA	AA	AA	AA	GG	AA	AA	AA	GG	GG	AA	GG	AA	AA	AA	GG	AA	AG	AG	AA	GG	AA	AA	AA	AA	AA	AA	AA	AA	AA	GG	AA	GG	AA	AA	AA	AA	AA
Gm09_38013391_A_G	Gm09	40608710	AA	AA	AA	AA	AA	AA	AA	AA	AA	AA	AA	AA	AA	AA	AA	AA	AA	AA	AA	AA	AA	AA	AA	AA	AA	AA	AA	AA	AA	AA	AA	AA	AA	AA	AA	AA	AA	AA	AA	AA	AA	AA	AA	AA	AA	AA	AA
Gm09_38454149_A_G	Gm09	41130494	AA	AA	AA	AA	AA	AA	AA	AA	AA	AA	AA	AA	AA	AA	AA	AA	AA	AA	AA	AA	AA	AA	AA	AA	AA	AA	AA	AA	AA	AA	AG	AA	AA	AA	AA	AA	AA	AA	AA	AA	AA	AA	AA	AA	AA	AA	AA
Gm09_38771421_G_A	Gm09	41449318	GG	GG	GG	GG	GG	GG	GG	GG	GG	GG	GG	GG	GG	GG	GG	GG	GG	GG	GG	GG	GG	GG	GG	GG	GG	GG	GG	GG	GG	GG	--	GG	GG	GG	GG	GG	GG	GG	GG	GG	GG	GG	GG	GG	GG	GG	GG
Gm09_38797525_C_A	Gm09	41475422	CC	CC	CC	CC	CC	CC	CC	CC	CC	CC	CC	CC	CC	CC	CC	CC	CC	CC	CC	CC	CC	CC	CC	CC	CC	CC	CC	CC	CC	CC	--	CC	CC	CC	CC	CC	CC	CC	CC	CC	CC	CC	CC	CC	CC	CC	CC
Gm09_38908716_T_C	Gm09	41586613	TT	TT	TT	TT	TT	TT	TT	TT	TT	TT	TT	TT	TT	TT	TT	TT	TT	TT	TT	TT	TT	TT	TT	TT	TT	TT	TT	TT	TT	TT	TC	TT	TT	TT	TT	TT	TT	TT	TT	TT	TT	TT	TT	TT	TT	TT	TT
Gm09_38927073_A_G	Gm09	41604970	AA	AA	AA	AA	AA	AA	AA	AA	AA	AA	AA	AA	AA	AA	AA	AA	AA	AA	AA	AA	AA	AA	AA	AA	AA	AA	AA	AA	AA	AA	AG	AA	AA	AA	AA	AA	AA	AA	AA	AA	AA	AA	AA	AA	AA	AA	AA
Gm09_39447611_G_T	Gm09	42124891	TT	TT	TT	GG	TT	TT	GG	--	TT	GG	GG	GG	GG	--	TT	TT	GG	TT	TT	TT	TT	GG	TT	TT	TT	--	GG	TT	--	TT	TG	TT	TT	TT	GG	TT	TT	GG	TG	GG	GG	GG	GG	TT	GG	TT	GG
Gm09_39693036_C_A	Gm09	42370093	AA	AA	AA	CC	AA	AA	CC	--	AA	CC	CC	CC	CC	--	AA	AA	CC	AA	AA	AA	AA	CC	AA	AA	AA	--	CC	AA	--	AA	AC	AA	AA	AA	CC	AA	AA	CC	AC	CC	CC	CC	CC	AA	CC	AA	CC
Gm09_40061792_C_T	Gm09	42738904	--	TT	TC	CC	TT	--	CC	CC	TT	CC	CC	CC	CC	--	TT	CC	CC	TT	--	TT	TT	CC	CC	TT	TT	--	CC	TT	--	CC	CC	TT	TT	TT	CC	TT	TT	CC	--	CC	CC	CC	CC	TC	CC	TT	CC
Gm09_40113368_A_G	Gm09	42790738	GG	GG	GG	AA	GG	GG	AA	AA	GG	AA	AA	AA	AA	AG	GG	AA	AA	GG	GG	GG	GG	AA	AA	GG	GG	AG	AA	GG	AG	AA	AA	GG	GG	GG	AG	GG	GG	AA	AA	AA	AA	AA	AA	GG	AA	GG	AA
Gm09_40407114_C_T	Gm09	43084231	CC	CC	CC	--	CC	CC	--	--	CC	TT	CC	--	--	CC	CC	--	TT	CC	CC	CC	CC	--	CC	CC	CC	CC	--	CC	CC	--	CC	CC	CC	CC	CC	CC	CC	TT	CC	TC	--	--	--	CC	--	CC	TT
Gm09_41103872_T_C	Gm09	43818290	TC	TT	--	CC	TT	TT	CC	CC	TT	CC	CC	CC	CC	--	TT	CC	CC	TT	--	TT	TT	CC	CC	--	TT	--	CC	TT	--	CC	CC	TT	TT	TT	TT	TT	TT	CC	CC	CC	CC	CC	CC	TC	CC	TT	CC
Gm09_41253226_T_C	Gm09	43968962	TT	TT	TT	TT	TT	TT	TT	CC	TT	CC	CC	CC	CC	TC	TT	CC	CC	TT	TT	TT	TT	CC	CC	TT	TT	TC	CC	TT	TC	CC	TT	TT	TT	TT	TT	TT	TT	CC	CC	CC	CC	CC	TC	TT	--	TT	CC
Gm09_43820536_T_C	Gm09	47025377	CC	CC	CC	CC	CC	CC	CC	TT	TC	TT	TT	CC	TT	CC	CC	CC	TT	TT	TT	CC	TC	TT	TT	TT	CC	TT	TT	CC	TT	TT	CC	CC	TC	CC	CC	CC	TT	TT	TT	TT	TT	CC	TC	CC	TC	TT	TT
Gm09_43874852_A_G	Gm09	47079696	GG	GG	GG	GG	GG	GG	GG	GG	GG	GG	GG	GG	GG	GG	GG	GG	GG	GG	GG	GG	GG	GG	GG	GG	GG	GG	GG	GG	GG	GG	GG	GG	GG	GG	GG	GG	GG	GG	GG	GG	GG	GG	GG	GG	GG	GG	GG
Gm09_44020265_C_T	Gm09	47225154	CC	--	CC	CC	CC	--	CC	TT	--	TT	TT	CC	TT	CC	CC	CC	TT	TT	TT	CC	--	TT	TC	--	CC	TT	TT	CC	--	TT	CC	CC	TC	CC	TT	CC	TT	--	TC	TT	TT	CC	--	CC	--	TT	TT
Gm09_44188059_T_C	Gm09	47388342	TT	TC	TT	TT	TC	TT	TT	CC	TC	CC	CC	TT	CC	TT	TT	TT	CC	CC	CC	TT	TC	CC	CC	TC	TT	CC	CC	TT	CC	CC	TT	TT	TC	TT	CC	TT	CC	CC	CC	CC	CC	TT	TC	TT	TC	CC	CC
Gm09_44266451_T_G	Gm09	47466734	TT	TG	TT	TT	TG	TT	TT	GG	TG	GG	GG	TT	GG	TT	TT	TT	GG	TT	GG	TT	TG	GG	GG	TG	TT	GG	GG	TT	GG	GG	TT	TT	TG	TT	GG	TT	GG	GG	--	GG	GG	TT	TG	TT	TG	GG	GG
Gm09_44598626_G_A	Gm09	47798573	AA	AA	GG	GG	AG	GG	GG	AA	AG	AA	AA	GG	AA	GG	GG	GG	AA	GG	AA	GG	AG	AA	AA	AG	GG	AA	AA	GG	AA	AA	GG	GG	AG	GG	AA	GG	AA	AA	AA	AA	AA	GG	AG	GG	AG	AA	AA
Gm09_44732111_G_A	Gm09	47932059	AA	AA	GG	GG	--	--	GG	AA	AG	AA	AA	GG	AA	GG	GG	GG	AA	GG	AA	GG	AG	AA	AG	--	GG	AA	AA	GG	--	AA	GG	GG	AG	GG	AA	GG	AA	--	AG	AA	AA	GG	AG	GG	AG	AA	AA
Gm09_44855340_C_T	Gm09	48055288	TT	TT	CC	CC	--	--	CC	TT	TC	TT	TT	CC	TT	CC	CC	CC	TT	CC	TT	CC	TC	TT	TC	--	CC	TT	TT	CC	--	TT	CC	CC	TT	CC	TT	CC	TT	--	TC	TT	TT	CC	TC	CC	TC	TT	TT
Gm09_45414016_C_T	Gm09	48612289	CC	CC	--	TT	TC	TC	TT	CC	--	CC	--	TT	CC	TT	TT	TC	CC	--	CC	TT	CC	CC	--	TC	TT	CC	CC	TT	CC	CC	TC	TT	CC	TT	CC	TT	CC	CC	--	CC	CC	TT	CC	TC	CC	CC	CC
Gm09_45548496_T_G	Gm09	48746815	TT	TT	GG	GG	TG	GG	GG	TT	TG	TT	GG	GG	TT	GG	GG	GG	GG	GG	TT	GG	TT	TT	TT	GG	GG	TT	TT	GG	TT	TT	GG	GG	TT	GG	TT	GG	TT	TT	TT	TT	TT	GG	TT	GG	TT	TT	TT
Gm09_45586982_T_C	Gm09	48785301	TT	TT	CC	CC	TC	CC	CC	TT	TC	TT	CC	--	TT	CC	CC	CC	CC	CC	TT	CC	TT	TT	--	CC	CC	TT	TT	CC	TT	TT	CC	CC	TT	CC	TT	CC	TT	TT	TT	TT	TT	CC	TT	CC	TT	TT	TT
Gm09_45659797_T_C	Gm09	48858116	TT	--	CC	CC	--	CC	CC	TT	TC	TT	CC	--	TT	CC	CC	--	CC	CC	TT	CC	TT	TT	TC	CC	CC	--	TT	CC	--	TT	CC	CC	TT	CC	TT	CC	TT	--	TC	TT	TT	CC	TT	--	TT	TT	TT
Gm09_45906491_A_C	Gm09	49104726	AA	AA	CC	CC	--	CC	CC	AA	AC	AA	CC	CC	AA	CC	CC	CC	CC	CC	AA	CC	AA	AA	AC	CC	CC	AA	AA	CC	--	AA	CC	CC	AA	CC	AA	CC	AA	--	AC	AA	AA	CC	AA	CC	AA	AA	AA
Gm09_45961226_G_A	Gm09	49159729	GG	GG	AA	AA	AG	AA	AA	GG	AG	GG	AA	--	GG	AA	AA	AA	AA	AA	GG	AA	GG	GG	--	AA	AA	GG	GG	AA	GG	GG	AA	AA	GG	AA	GG	AA	GG	GG	AG	GG	GG	AA	GG	AA	GG	GG	GG
Gm09_46243163_T_C	Gm09	49446584	TT	TC	CC	CC	--	CC	CC	TT	TC	TT	CC	CC	TT	CC	CC	CC	CC	CC	TT	CC	TT	TT	TC	CC	CC	--	TT	CC	--	TT	CC	CC	TT	CC	TT	CC	TT	TC	TC	TT	TT	CC	TT	CC	TT	TT	TT
Gm09_46319164_G_T	Gm09	49522637	GG	GG	TG	--	--	--	TT	GG	--	GG	TG	TG	GG	TT	TT	TG	TT	TG	GG	TT	GG	GG	GG	--	--	GG	GG	TT	GG	GG	TG	TT	GG	TT	GG	TT	GG	GG	--	GG	GG	TG	GG	TG	GG	GG	GG
Gm09_46570461_A_G	Gm09	49775019	AA	AG	GG	GG	--	GG	GG	AA	AG	AA	GG	--	AA	GG	GG	--	GG	GG	AA	GG	AA	AA	AG	GG	GG	AA	AA	GG	--	AA	GG	GG	AA	GG	AA	GG	AA	--	AG	AA	AA	GG	AA	--	AA	AA	AA
Gm09_46694731_C_A	Gm09	49901270	--	--	AA	AA	--	AA	AA	CC	AC	CC	AA	AA	CC	AA	AA	AA	AA	AA	CC	AA	CC	--	AC	AA	AA	--	CC	AA	--	CC	AA	AA	CC	AA	CC	AA	CC	AC	AC	CC	CC	AA	CC	AA	CC	CC	CC
Gm10_121493_A_G	Gm10	116991	GG	GG	GG	GG	GG	AA	GG	AA	GG	GG	GG	AA	AA	GG	GG	--	AA	AA	GG	--	GG	GG	AA	AA	GG	GG	GG	GG	GG	GG	GG	GG	GG	AA	AA	AA	AA	GG	GG	AA	AA	AA	GG	GG	GG	AA	GG
Gm10_214458_C_T	Gm10	209957	TT	TT	TT	TT	TT	CC	TT	CC	TT	TT	TT	CC	CC	TT	TT	TC	CC	CC	TT	--	TT	TT	CC	CC	TT	TT	TT	TT	--	TT	TT	TT	TT	CC	CC	CC	CC	TT	TT	CC	CC	CC	TT	--	TT	CC	TT
Gm10_227864_A_G	Gm10	223363	GG	GG	GG	GG	GG	AA	GG	AA	GG	GG	GG	AA	AA	GG	GG	AG	AA	AA	GG	AG	GG	GG	AA	AA	GG	GG	GG	GG	GG	GG	GG	GG	GG	AA	AA	AA	AA	GG	GG	AA	AA	AA	GG	GG	GG	AA	GG
Gm10_2437001_A_G	Gm10	2445007	GG	GG	GG	GG	GG	GG	GG	AA	GG	GG	GG	GG	GG	GG	GG	GG	AA	GG	GG	GG	GG	AA	GG	AA	GG	GG	GG	GG	GG	GG	--	AA	AA	GG	AA	GG	GG	GG	GG	GG	GG	GG	GG	GG	GG	GG	GG
Gm10_2714130_C_T	Gm10	2722140	CC	CC	CC	CC	CC	CC	CC	TT	TT	CC	CC	CC	CC	CC	CC	CC	TT	CC	CC	CC	CC	TT	CC	TT	CC	CC	CC	CC	CC	CC	--	TT	TT	CC	TT	CC	CC	CC	CC	CC	CC	CC	CC	CC	CC	CC	CC
Gm10_3375821_T_C	Gm10	3384270	CC	CC	TT	CC	CC	--	CC	TT	TT	TT	CC	TC	TT	TT	CC	CC	TT	CC	CC	TT	CC	TT	--	TT	CC	TT	CC	CC	CC	CC	CC	TT	TT	TT	TT	CC	CC	--	CC	TT	--	TT	TT	TT	TT	CC	TT
Gm10_3465857_C_T	Gm10	3474358	CC	CC	CC	CC	CC	CC	CC	TT	TC	CC	CC	CC	CC	CC	CC	CC	TT	CC	CC	CC	CC	TT	CC	TT	CC	CC	CC	CC	CC	CC	CC	TT	TT	CC	TT	CC	CC	CC	CC	CC	CC	CC	CC	CC	CC	CC	CC
Gm10_3840102_T_C	Gm10	3857527	CC	CC	TT	CC	CC	TT	CC	TT	TT	TT	CC	TC	TT	TT	CC	CC	TT	CC	CC	TT	CC	TT	--	TT	TT	TT	TT	CC	CC	CC	CC	TT	TT	TT	TT	CC	CC	TT	CC	TT	TT	TT	TT	TT	TT	CC	TT
Gm10_4218276_T_C	Gm10	4234910	TT	TT	CC	TT	TT	--	TT	TT	--	CC	CC	CC	CC	CC	TT	TT	TT	TT	TT	CC	TT	TT	--	TT	CC	CC	TT	TT	CC	TT	TT	TT	TT	TC	TT	TT	TT	--	TT	CC	TC	CC	CC	CC	CC	TT	CC
Gm10_4360182_A_G	Gm10	4376815	AA	AA	GG	AA	AA	GG	AG	AA	AG	GG	GG	GG	GG	GG	AA	AA	AA	AA	AA	GG	AA	AA	--	AA	GG	GG	AA	AA	GG	AA	AA	AA	AA	AG	AA	AA	AA	GG	AA	GG	GG	GG	GG	GG	GG	AA	GG
Gm10_4458104_G_A	Gm10	4474732	AG	AG	GG	AA	GG	GG	--	AG	--	GG	GG	GG	GG	GG	AA	AA	AA	AA	AA	GG	AA	AA	AG	AA	GG	GG	AA	AA	GG	AA	AG	AA	AA	--	AA	AA	AA	GG	AA	GG	GG	GG	GG	GG	GG	AA	GG
Gm10_4628151_G_A	Gm10	4644778	AA	AA	GG	AA	AA	GG	AG	AA	AG	GG	GG	GG	GG	GG	AA	AA	AA	AA	AA	GG	AA	GG	AG	AA	GG	GG	AG	AA	GG	AA	AA	AA	AA	--	AA	AA	AA	GG	--	GG	GG	GG	GG	GG	GG	AA	GG
Gm10_4670275_G_A	Gm10	4687011	AG	AG	AA	GG	GG	AA	--	AG	--	AA	AA	AA	AA	AA	GG	AG	GG	GG	GG	AA	GG	AA	AG	GG	AA	AA	--	GG	AA	GG	AG	GG	GG	--	GG	GG	GG	AA	--	AA	AA	AA	AA	AA	AA	GG	AA
Gm10_4722679_A_G	Gm10	4739387	GG	GG	AA	GG	GG	AA	AG	GG	AG	AA	AA	AA	AA	AA	GG	GG	GG	GG	GG	AA	GG	AA	--	GG	AA	AA	AG	GG	AA	GG	GG	GG	GG	--	GG	GG	GG	AA	AA	AA	AA	AA	AA	AA	AA	GG	AA
Gm10_4775496_T_C	Gm10	4794720	CC	CC	CC	CC	CC	CC	CC	CC	CC	CC	CC	CC	CC	CC	CC	CC	CC	CC	CC	CC	CC	CC	CC	CC	CC	CC	CC	CC	CC	CC	CC	CC	CC	CC	CC	CC	CC	CC	CC	CC	CC	CC	CC	CC	CC	CC	CC
Gm10_4814162_C_T	Gm10	4833274	TT	TT	CC	TT	TT	CC	TC	TT	TC	CC	CC	CC	CC	CC	TT	TT	TT	TT	TT	CC	TT	CC	--	TT	CC	CC	TC	TT	CC	TT	TT	TT	TT	TC	TT	TT	TT	CC	TC	CC	CC	CC	CC	CC	CC	TT	CC
Gm10_4892612_G_A	Gm10	4911476	--	--	GG	AA	AA	GG	--	--	AG	GG	GG	GG	GG	GG	AA	--	AA	AA	AA	GG	AA	GG	AG	AA	GG	GG	--	AA	GG	AA	--	AA	AA	AA	AA	AA	AA	GG	--	GG	GG	GG	GG	GG	GG	AA	GG
Gm10_4972351_T_C	Gm10	4991089	--	CC	TT	CC	CC	TC	--	CC	--	--	--	TT	TT	TT	CC	CC	CC	CC	CC	TT	CC	TT	CC	CC	TT	TT	--	CC	--	CC	CC	CC	CC	CC	CC	CC	CC	TC	TC	TT	TC	TT	--	TT	TT	CC	--
Gm10_5026251_T_C	Gm10	5044988	--	CC	TT	CC	CC	TT	TC	CC	TC	TT	TT	TT	TT	TT	CC	CC	CC	CC	CC	TT	CC	TT	--	CC	TT	TT	TC	CC	TT	CC	CC	CC	CC	CC	CC	CC	CC	TT	TC	TT	TT	TT	TT	TT	TT	CC	TT
Gm10_5206933_A_C	Gm10	5229058	--	AC	AA	CC	CC	AA	--	--	AC	AA	AA	AA	AA	AA	CC	AC	CC	CC	CC	AA	CC	AA	AC	CC	AA	AA	AC	CC	AA	CC	--	CC	CC	CC	CC	CC	CC	AA	--	AA	AA	AA	AA	AA	AA	CC	AA
Gm10_5404728_C_A	Gm10	5436558	CC	CC	CC	CC	CC	CC	CC	CC	CC	CC	CC	CC	CC	CC	CC	CC	CC	CC	CC	CC	CC	CC	CC	CC	CC	CC	CC	CC	CC	CC	CC	CC	CC	CC	CC	CC	CC	CC	CC	CC	CC	CC	CC	CC	CC	CC	CC
Gm10_5775923_A_G	Gm10	5808402	--	AG	GG	GG	AG	GG	AG	AG	AG	GG	GG	GG	GG	GG	AG	GG	AG	AG	AG	GG	AG	GG	AG	AG	GG	GG	AG	AG	GG	AG	AG	AG	AG	AG	AG	AG	AG	GG	--	GG	AG	GG	GG	GG	GG	AG	GG
Gm10_5922076_T_G	Gm10	5954818	TG	GG	TT	TT	GG	TT	TG	GG	TT	TT	TT	TT	TT	TT	GG	TT	GG	GG	GG	TT	GG	TT	--	GG	TT	TT	TG	GG	TT	GG	GG	GG	GG	GG	GG	TG	GG	TT	TG	TT	GG	TT	TT	TT	TT	GG	TT
Gm10_6196864_T_G	Gm10	6220803	TT	TT	TT	TT	TT	TT	TT	TT	TT	TT	TT	TT	TT	TT	TT	TT	TT	TT	TT	TT	TT	TT	TT	TT	TT	TT	TT	TT	TT	TT	TT	TT	TT	TT	TT	TT	TT	TT	TT	TT	TT	TT	TT	TT	TT	TT	TT
Gm10_6460304_G_A	Gm10	6487877	GG	GG	GG	GG	GG	GG	GG	GG	GG	GG	GG	GG	GG	GG	GG	GG	GG	GG	GG	GG	GG	GG	GG	GG	GG	GG	GG	GG	GG	GG	GG	GG	GG	GG	GG	GG	GG	GG	GG	GG	GG	GG	GG	GG	GG	GG	GG
Gm10_6572950_G_A	Gm10	6600506	GG	GG	GG	GG	GG	GG	GG	GG	GG	GG	GG	GG	GG	GG	GG	GG	GG	GG	GG	GG	GG	GG	GG	GG	GG	GG	GG	GG	GG	GG	GG	GG	GG	GG	GG	GG	GG	GG	GG	GG	GG	GG	GG	GG	GG	GG	GG
Gm10_6663940_T_C	Gm10	6700374	CC	CC	CC	CC	CC	CC	CC	CC	CC	CC	CC	CC	CC	CC	CC	CC	CC	CC	CC	CC	CC	CC	CC	CC	CC	CC	CC	CC	CC	CC	CC	CC	CC	CC	CC	CC	CC	CC	CC	CC	CC	CC	CC	CC	CC	CC	CC
Gm10_7507435_C_T	Gm10	7684035	--	--	--	CC	TT	CC	TT	--	CC	CC	TT	CC	CC	CC	CC	CC	TT	--	TT	TT	TT	CC	TC	TT	CC	TT	TC	TT	--	TT	--	TT	TT	TT	TT	TC	TT	TC	TC	CC	TT	CC	CC	CC	CC	TT	CC
Gm10_9207487_A_C	Gm10	9391907	--	--	--	AA	CC	AA	CC	--	AA	AA	CC	AA	AA	AA	AA	AA	CC	--	CC	CC	CC	AA	AC	CC	AA	CC	--	CC	AA	CC	--	CC	CC	CC	CC	--	CC	--	--	AA	CC	AA	AA	AA	AA	CC	AA
Gm10_9575150_C_T	Gm10	9759641	--	--	--	CC	TT	CC	TT	--	CC	CC	TT	CC	CC	CC	CC	CC	TT	--	TT	TT	TT	CC	TC	TT	CC	TT	TC	TT	CC	TT	--	TT	TT	TT	TT	--	TT	TC	--	CC	TT	CC	CC	CC	CC	TT	CC
Gm10_10015896_C_T	Gm10	10197783	--	--	TC	CC	TT	CC	TT	--	CC	CC	TT	CC	CC	CC	CC	CC	TT	--	TT	TT	TT	CC	TC	TT	CC	TT	TC	TT	CC	TT	--	TT	TT	TT	TT	--	TT	TC	--	CC	TT	CC	CC	CC	CC	TT	CC
Gm10_11518881_G_A	Gm10	11710604	AG	GG	GG	AA	GG	AA	GG	GG	AA	AA	GG	AA	AA	AA	AA	AA	GG	GG	GG	GG	GG	AA	--	GG	AA	GG	--	GG	AA	GG	AG	GG	GG	GG	GG	AG	GG	GG	AG	AA	GG	AA	AA	AA	AA	GG	AA
Gm10_12080275_G_A	Gm10	12272454	AG	GG	GG	AA	GG	AA	GG	GG	AA	AA	GG	AA	AA	AA	AA	AA	GG	GG	GG	GG	GG	AA	--	GG	AA	GG	AG	GG	AA	GG	AG	GG	GG	GG	GG	AG	GG	GG	AG	AA	GG	AA	AA	AA	AA	GG	AA
Gm10_12500364_A_G	Gm10	12677900	GG	GG	GG	GG	GG	GG	GG	GG	GG	GG	GG	GG	GG	GG	GG	GG	GG	GG	GG	GG	GG	GG	GG	GG	GG	GG	GG	GG	GG	GG	GG	GG	GG	GG	GG	GG	GG	GG	GG	GG	GG	GG	GG	GG	GG	GG	GG
Gm10_13185363_T_C	Gm10	13371564	TC	--	--	CC	TT	CC	TT	--	CC	CC	TT	CC	CC	CC	CC	--	TT	--	TT	TT	TT	CC	TC	TT	CC	TT	TC	TT	--	TT	TC	TT	TT	TT	TT	TC	TT	--	TC	CC	TT	CC	CC	CC	CC	TT	CC
Gm10_13684185_C_A	Gm10	13870722	--	AC	AC	AA	CC	AA	CC	AC	AA	AA	CC	AA	AA	AA	AA	AA	CC	AC	CC	CC	CC	AA	AC	CC	AA	CC	AC	CC	AA	CC	--	CC	CC	CC	CC	--	CC	AC	--	AA	CC	AA	AA	AA	AA	CC	AA
Gm10_26188429_A_G	Gm10	16707334	--	--	--	GG	AA	GG	AA	--	GG	GG	AA	GG	GG	GG	GG	GG	AA	AG	AA	AA	AA	GG	AG	AA	GG	AA	AG	AA	GG	AA	--	AA	AA	AA	AA	--	AA	--	--	GG	AA	GG	GG	GG	GG	AA	GG
Gm10_26598887_A_G	Gm10	17107529	AG	AA	AA	GG	AA	GG	AA	AA	GG	GG	AA	GG	GG	GG	GG	GG	AA	AA	AA	AA	AA	GG	--	AA	GG	AA	--	AA	GG	AA	AG	AA	AA	AA	AA	AG	AA	AA	AG	GG	AA	GG	GG	GG	GG	AA	GG
Gm10_27849090_A_G	Gm10	18353670	AG	AA	AA	GG	AA	GG	AA	AA	GG	GG	AA	GG	GG	GG	GG	GG	AA	AA	AA	AA	AA	GG	--	AA	GG	AA	AG	AA	GG	AA	AG	AA	AA	AA	AA	AG	AA	--	AG	GG	AA	GG	GG	GG	GG	AA	GG
Gm10_23967467_T_C	Gm10	20275514	--	--	--	CC	TT	CC	TT	--	CC	CC	TT	CC	CC	CC	CC	CC	TT	--	TT	TT	TT	CC	TC	TT	CC	TT	TC	TT	--	TT	--	TT	TT	TT	TT	--	TT	TC	--	CC	TT	CC	CC	CC	CC	TT	CC
Gm10_23868600_A_G	Gm10	20380713	AG	AA	AA	GG	AA	GG	AA	AA	GG	GG	AA	GG	GG	GG	GG	GG	AA	AA	AA	AA	AA	GG	--	AA	GG	AA	AG	AA	GG	AA	AG	AA	AA	AA	AA	AG	AA	AA	AG	GG	AA	GG	GG	GG	GG	AA	GG
Gm10_23322034_G_A	Gm10	20923667	AG	GG	GG	AA	GG	AA	GG	GG	AA	AA	GG	AA	AA	AA	AA	AA	GG	GG	GG	GG	GG	AA	--	GG	AA	GG	AG	GG	AA	GG	AG	GG	GG	GG	GG	AG	GG	GG	AG	AA	GG	AA	AA	AA	AA	GG	AA
Gm10_21384300_A_G	Gm10	21487994	AG	AA	AA	GG	AA	GG	AA	AA	GG	GG	AA	GG	GG	GG	GG	GG	AA	AA	AA	AA	AA	GG	--	AA	GG	AA	AG	AA	GG	AA	AG	AA	AA	AA	AA	AG	AA	AA	AG	GG	AA	GG	GG	GG	GG	AA	GG
Gm10_20222067_T_C	Gm10	22704627	--	TT	--	CC	TT	CC	TT	TT	CC	CC	TT	CC	CC	CC	CC	CC	TT	--	TT	TT	TT	CC	TC	TT	CC	TT	TC	TT	--	TT	--	TT	TT	TT	TT	--	TT	--	--	CC	TT	CC	CC	CC	CC	TT	CC
Gm17_9749711_A_G	Gm10	24446676	AA	AA	AA	AA	AA	AA	AA	AA	AA	AA	AA	AA	AA	AA	AA	AA	AA	AA	AA	AA	AA	AA	AA	AA	AA	AA	AA	AA	AA	AA	AA	AA	AA	AA	AA	AA	AA	AA	AA	AA	AA	AA	AA	AA	AA	AA	AA
Gm10_18092265_A_G	Gm10	24845866	AA	AA	AA	AA	AA	AA	AA	AA	AA	AA	AA	AA	AA	AA	AA	AA	AA	AA	AA	AA	AA	AA	AA	AA	AA	AA	AA	AA	AA	AA	AA	AA	AA	AA	AA	AA	AA	AA	AA	AA	AA	AA	AA	AA	AA	AA	AA
Gm10_17148524_C_A	Gm10	25805858	CC	CC	CC	CC	CC	CC	CC	CC	CC	CC	CC	CC	CC	CC	CC	CC	CC	CC	CC	CC	CC	CC	CC	CC	CC	CC	CC	CC	CC	CC	CC	CC	CC	CC	CC	CC	CC	CC	CC	CC	CC	CC	CC	CC	CC	CC	CC
Gm10_33347216_A_G	Gm10	33752433	--	GG	GG	AA	GG	AA	GG	GG	AA	AA	GG	AA	AA	AA	AA	AA	GG	GG	GG	GG	GG	AA	--	GG	AA	GG	--	GG	AG	GG	AG	GG	GG	GG	GG	AG	GG	GG	--	AA	GG	AA	AA	GG	AA	GG	AA
Gm10_36448006_T_G	Gm10	36974968	--	TG	TG	GG	TT	GG	TT	--	GG	GG	TT	GG	GG	GG	GG	GG	TT	TG	TT	TT	TT	GG	TG	TT	GG	TT	--	TT	GG	TT	--	TT	TT	TT	TT	--	TT	TG	--	GG	TT	GG	GG	TG	GG	TT	GG
Gm10_36634025_T_C	Gm10	37161455	TC	TT	TT	CC	TT	CC	TT	TT	CC	CC	TT	CC	CC	CC	CC	CC	TT	TT	TT	TT	TT	CC	--	TT	CC	TT	TC	TT	CC	TT	--	TT	TT	TT	TT	TC	TT	TT	TC	CC	TT	CC	CC	--	CC	TT	CC
Gm10_36651216_A_C	Gm10	37178646	AC	--	--	CC	AA	CC	AA	--	CC	CC	AA	CC	CC	CC	CC	--	AA	--	AA	AA	AA	CC	AC	AA	CC	AA	AC	AA	--	AA	AC	AA	AA	AA	AA	AC	AA	--	AC	CC	AA	CC	CC	--	CC	AA	CC
Gm10_36697318_G_A	Gm10	37224752	AG	GG	GG	AA	GG	AA	GG	GG	AA	AA	GG	AA	AA	AA	AA	AA	GG	GG	GG	AA	GG	AA	--	GG	AA	GG	AG	GG	AA	GG	--	GG	GG	GG	GG	AG	GG	GG	AG	AA	GG	AA	AA	GG	AA	GG	AA
Gm10_36725190_G_A	Gm10	37252624	AA	AA	AA	AA	AA	AA	AA	AA	AA	AA	AA	AA	AA	AA	AA	AA	AA	AA	AA	AA	AA	AA	--	AA	AA	AA	AA	AA	AA	AA	AA	AA	AA	AA	AA	AA	AA	AA	AA	AA	AA	AA	AA	AA	AA	AA	AA
Gm10_36761186_A_G	Gm10	37288018	AG	AA	AA	GG	AA	GG	AA	AA	GG	GG	AA	GG	GG	GG	GG	GG	AA	AA	AA	GG	AA	GG	--	AA	GG	AA	AG	AA	GG	AA	--	AA	AA	AA	AA	AG	AA	AA	AG	GG	AA	GG	GG	AA	GG	AA	GG
Gm10_36975604_C_T	Gm10	37502435	CC	CC	CC	CC	CC	CC	CC	CC	CC	CC	CC	CC	CC	CC	CC	CC	CC	CC	CC	CC	CC	CC	CC	CC	CC	CC	CC	CC	CC	CC	CC	CC	CC	CC	CC	CC	CC	CC	CC	CC	CC	CC	CC	CC	CC	CC	CC
Gm10_37298266_A_G	Gm10	37824499	AA	GG	GG	AA	GG	AA	GG	GG	AA	AA	GG	AA	AA	AA	AA	AA	GG	GG	GG	AA	GG	AA	--	GG	AA	GG	AG	GG	AA	GG	--	GG	GG	GG	GG	AG	GG	GG	AG	AA	GG	AA	AA	GG	AA	AG	AA
Gm10_37390628_A_G	Gm10	37916823	AA	AA	GG	AA	GG	AA	GG	GG	AA	AA	GG	AA	AA	AA	AA	AA	GG	GG	GG	AA	GG	AA	--	GG	AA	GG	AG	GG	AA	GG	--	GG	GG	GG	GG	AG	GG	--	AG	AA	GG	AA	AA	--	AA	AG	AA
Gm10_37618173_A_G	Gm10	38142567	--	AA	GG	AA	GG	AA	GG	GG	AA	AA	GG	AA	AA	AA	AA	--	GG	GG	GG	AA	GG	GG	--	GG	AA	GG	--	GG	AG	GG	AG	GG	GG	GG	GG	AG	GG	GG	AG	GG	GG	--	AA	GG	AA	--	AA
Gm10_37694425_C_T	Gm10	38218813	TC	TC	TT	TC	TT	--	TT	TT	TC	TC	TT	CC	--	TC	TC	TC	TT	CC	TT	TC	TT	TT	--	TT	TC	TT	TT	TT	TT	TT	--	TT	TT	TT	TT	--	TT	--	--	TT	TT	TC	TC	--	TC	--	TC
Gm10_37762178_C_T	Gm10	38286609	CC	CC	CC	CC	CC	CC	CC	CC	CC	CC	CC	CC	CC	CC	CC	CC	CC	CC	CC	CC	CC	CC	CC	CC	CC	CC	CC	CC	CC	CC	CC	CC	CC	CC	CC	CC	CC	CC	CC	CC	CC	CC	CC	CC	CC	CC	CC
Gm10_38661148_C_T	Gm10	39209324	--	--	CC	TC	CC	TC	CC	TC	TT	TC	CC	TT	TC	--	--	TC	--	TC	CC	TC	CC	--	--	--	CC	CC	CC	CC	CC	CC	CC	TC	TC	CC	--	--	CC	CC	--	CC	CC	TC	--	TC	TC	--	--
Gm10_38751669_C_A	Gm10	39299840	--	AC	CC	AC	CC	AC	AC	AC	AC	AC	CC	AA	AC	AC	AC	AC	AC	AC	CC	AC	CC	--	CC	AC	CC	CC	CC	CC	CC	CC	CC	AC	AC	CC	AC	--	CC	CC	--	CC	CC	--	--	AC	AC	--	AC
Gm10_39350141_T_C	Gm10	39906756	CC	CC	CC	CC	TT	CC	CC	TT	CC	CC	TT	CC	CC	TT	CC	CC	TT	CC	TT	CC	TT	TT	TT	TT	TT	CC	TT	TT	CC	TT	TT	TT	TT	CC	TT	CC	CC	--	CC	TT	CC	TT	CC	TT	CC	CC	CC
Gm10_39501335_C_A	Gm10	40057951	AA	AA	AA	AA	CC	AA	AA	AC	AA	AA	CC	AA	AA	CC	AA	AA	CC	AA	CC	AA	CC	CC	AC	CC	--	AA	CC	CC	AA	CC	CC	CC	CC	AA	CC	AA	AA	--	AA	CC	AA	CC	AA	AC	AA	AA	AA
Gm10_39771689_T_G	Gm10	40329105	--	GG	GG	GG	TT	--	TT	TT	--	TG	TT	GG	GG	TT	GG	GG	TT	GG	TT	GG	TT	TT	TT	TT	TT	GG	TT	TT	TG	TT	TT	TT	TT	GG	TT	GG	GG	--	TG	TT	GG	TT	--	--	GG	GG	GG
Gm10_39827303_A_C	Gm10	40384719	CC	CC	CC	CC	AA	CC	AA	AA	CC	CC	AA	CC	CC	AA	CC	CC	AA	CC	AA	CC	AA	AA	AA	AA	AA	CC	AA	AA	CC	AA	AA	AA	AA	CC	AA	CC	CC	AC	--	AA	CC	AA	CC	AA	CC	CC	CC
Gm10_40022334_A_C	Gm10	40581832	--	AA	AC	AA	CC	--	CC	CC	AC	CC	CC	AA	--	CC	AA	AA	CC	AA	CC	AA	CC	CC	CC	CC	CC	AA	CC	CC	AC	CC	CC	CC	CC	AA	CC	AA	AA	--	AC	CC	AA	CC	AC	CC	AA	AA	AA
Gm10_40077126_A_G	Gm10	40636624	AA	AA	AA	AA	GG	AA	GG	GG	AA	GG	GG	AA	AG	GG	AA	AA	GG	AA	GG	AA	GG	--	GG	GG	GG	AA	GG	GG	AA	GG	GG	GG	GG	AA	GG	AA	AA	AG	AA	GG	AA	GG	AA	GG	AA	AA	AA
Gm10_40258740_G_A	Gm10	40818239	AA	AA	GG	AA	AA	AA	AA	AA	AA	AA	AA	AA	AA	AA	AG	AA	AA	AA	AA	AA	AA	AA	AA	AA	AA	GG	AA	AA	GG	AA	AA	AA	AA	GG	AA	AA	AA	AA	AA	AA	GG	AA	AA	AA	AA	AA	AA
Gm10_40692799_T_C	Gm10	41226209	TT	TT	TT	TT	CC	TT	CC	CC	TT	CC	TT	TT	CC	CC	TT	TT	CC	TT	CC	TT	CC	TT	CC	CC	CC	TT	CC	CC	TT	CC	TT	CC	CC	TT	CC	TT	TC	TC	--	CC	TT	CC	TT	--	TT	--	TT
Gm10_41103076_T_C	Gm10	41649823	TT	TT	TT	TT	TT	TT	TT	TT	TT	TT	TT	TT	TT	TT	TT	TT	TT	TT	TT	TT	TT	TT	TT	TT	TT	TT	TT	TT	TT	TT	TT	TT	TT	TT	TT	TT	TT	TT	TT	TT	TT	TT	TT	TT	TT	TT	TT
Gm10_41374120_G_A	Gm10	41929339	GG	GG	GG	GG	GG	GG	GG	GG	GG	GG	GG	GG	GG	GG	GG	GG	GG	GG	GG	GG	GG	GG	GG	GG	GG	GG	GG	GG	GG	GG	GG	GG	GG	GG	GG	GG	GG	GG	GG	GG	GG	GG	GG	GG	GG	GG	GG
Gm10_41445184_T_C	Gm10	42000403	TT	TT	TT	TT	TT	TT	TT	TT	TT	TT	TT	TT	TT	TT	TT	TT	TT	TT	TT	TT	TT	TT	TT	TT	TT	TT	TT	TT	TT	TT	TT	TT	TT	TT	TT	TT	TT	TT	TT	TT	TT	TT	TT	TT	TT	TT	TT
Gm10_41488608_T_G	Gm10	42043833	TT	TT	TT	TT	TT	TT	TT	TT	TT	TT	TT	TT	TT	TT	TT	TT	TT	TT	TT	TT	TT	TT	TT	TT	TT	TT	TT	TT	TT	TT	TT	TT	TT	TT	TT	TT	TT	TT	TT	TT	TT	TT	TT	TT	TT	TT	TT
Gm10_41610215_C_T	Gm10	42166065	CC	CC	CC	CC	CC	CC	CC	CC	CC	CC	CC	CC	CC	CC	CC	CC	CC	CC	CC	CC	CC	CC	CC	CC	CC	CC	CC	CC	CC	CC	CC	CC	CC	CC	CC	CC	CC	CC	CC	CC	CC	CC	CC	CC	CC	CC	CC
Gm10_41958155_A_G	Gm10	42522750	AA	AA	AA	AA	AA	AA	AA	AA	AA	AA	AA	AA	AA	AA	AA	AA	AA	AA	AA	AA	AA	AA	AA	AA	AA	AA	AA	AA	AA	AA	AA	AA	AA	AA	AA	AA	AA	AA	AA	AA	AA	AA	AA	AA	AA	AA	AA
Gm10_42296579_T_G	Gm10	42861060	TT	TT	TT	TT	TT	TT	TT	TT	TT	TT	TT	TT	TT	TT	TT	TT	TT	TT	TT	TT	TT	TT	TT	TT	TT	TT	TT	TT	TT	TT	TT	TT	TT	TT	TT	TT	TT	TT	TT	TT	TT	TT	TT	TT	TT	TT	TT
Gm10_44091618_T_C	Gm10	44671785	TT	TT	TT	TT	TT	TT	TT	TT	TT	TT	TT	TT	TT	TT	TT	TT	TT	TT	TT	TT	TT	TT	TT	TT	TT	TT	TT	TT	TT	TT	TT	TT	TT	TT	TT	TT	TT	TT	TT	TT	TT	TT	TT	TT	TT	TT	TT
Gm10_44137020_T_C	Gm10	44714548	TT	TT	TT	TT	TT	TT	TT	TT	TT	TT	TT	TT	TT	TT	TT	TT	TT	TT	TT	TT	TT	TT	TT	TT	TT	TT	TT	TT	TT	TT	TT	TT	TT	TT	TT	TT	TT	TT	TT	TT	TT	TT	TT	TT	TT	TT	TT
Gm10_44227652_C_T	Gm10	44805178	TT	TT	TT	TT	TT	TT	TT	TT	TT	TT	TT	TT	TT	TT	TT	TT	--	TT	TT	TT	TT	TT	TT	TT	TT	TT	TT	TT	TT	TT	TT	TT	TT	TT	TT	TT	TT	TT	TT	TT	TT	TT	TT	TT	TT	TT	TT
Gm10_44274964_T_G	Gm10	44852490	TT	TT	TT	TT	TT	TT	TT	TT	TT	TT	TT	TT	TT	TT	TT	TT	TT	TT	TT	TT	TT	TT	TT	TT	TT	TT	TT	TT	TT	TT	TT	TT	TT	TT	TT	TT	TT	TT	TT	TT	TT	TT	TT	TT	TT	TT	TT
Gm10_44972284_T_C	Gm10	45550230	TT	TT	TT	TT	TT	TT	TT	TT	TT	TT	TT	TT	TT	TT	TT	TT	TT	TT	TT	TT	TT	TT	TT	TT	TT	TT	TT	TT	TT	TT	TT	TT	TT	TT	TT	TT	TT	TT	TT	TT	TT	TT	TT	TT	TT	TT	TT
Gm10_45141082_A_G	Gm10	45722273	GG	AA	AG	AA	AA	GG	GG	--	--	GG	GG	AA	AA	GG	GG	GG	AA	GG	--	GG	AA	--	--	--	AA	GG	AA	AA	AA	AA	GG	AA	AA	GG	AA	AA	AA	--	AG	AA	GG	GG	GG	--	GG	AA	GG
Gm10_45332216_A_G	Gm10	45903960	AA	AA	AA	AA	AA	AA	AA	AA	AA	AA	AA	AA	AA	AA	AA	AA	AA	AA	AA	AA	AA	AA	AA	AA	AA	AA	AA	AA	AA	AA	AA	AA	AA	AA	AA	AA	AA	AA	AA	AA	AA	AA	AA	AA	AA	AA	AA
Gm10_45608453_A_G	Gm10	46179721	AA	AA	AA	AA	AA	AA	AA	AA	AA	AA	AA	AA	AA	AA	AA	AA	AA	AA	AA	AA	AA	AA	AA	AA	AA	AA	AA	AA	AA	AA	AA	AA	AA	AA	AA	AA	AA	AA	AA	AA	AA	AA	AA	AA	AA	AA	AA
Gm10_45670539_T_C	Gm10	46241807	CC	CC	CC	CC	CC	CC	CC	CC	CC	CC	CC	CC	CC	CC	CC	CC	CC	CC	CC	CC	CC	CC	CC	CC	CC	CC	CC	CC	CC	CC	CC	CC	CC	CC	CC	CC	CC	CC	CC	CC	CC	CC	CC	CC	CC	CC	CC
Gm10_45863169_A_G	Gm10	46434446	GG	GG	GG	GG	GG	AG	AA	GG	GG	AG	AA	GG	AA	AA	AA	AG	GG	AG	GG	AA	GG	--	GG	GG	GG	AA	GG	GG	GG	GG	AA	GG	GG	AA	GG	GG	GG	AG	GG	GG	AA	AG	AG	GG	AA	GG	GG
Gm10_45890133_C_T	Gm10	46461410	TT	TT	TC	TT	TT	CC	CC	TT	TT	CC	CC	TT	CC	CC	CC	CC	TT	CC	TC	CC	TT	CC	TT	TT	TT	CC	TT	TT	TT	TT	CC	TT	TT	CC	TT	TT	TT	CC	--	TT	CC	CC	CC	TC	CC	TT	TT
Gm10_46069887_A_G	Gm10	46639345	GG	GG	GG	GG	GG	AA	AA	GG	GG	AA	AA	GG	AA	AA	AA	AA	GG	AA	GG	AA	GG	AA	GG	GG	GG	AA	GG	GG	GG	GG	AA	GG	GG	AA	GG	GG	GG	AA	--	GG	AA	AA	AA	GG	AA	GG	GG
Gm10_46269434_G_A	Gm10	46839076	AA	AA	AA	AA	AA	GG	GG	AA	AA	GG	GG	AA	GG	GG	GG	GG	AA	GG	AA	GG	AA	GG	AA	AA	AA	GG	AA	AA	AA	AA	GG	AA	AA	GG	AA	AA	AA	GG	AA	AA	GG	GG	GG	AA	GG	AA	AA
Gm10_46688003_C_T	Gm10	47258556	CC	CC	CC	CC	CC	TT	TT	CC	CC	TT	TT	CC	TT	TT	TT	TT	CC	TT	CC	TT	CC	TT	CC	CC	CC	TT	CC	CC	CC	CC	TT	CC	CC	TT	CC	CC	CC	TT	--	CC	TT	TT	TT	CC	TT	CC	CC
Gm10_47417315_G_A	Gm10	48012886	AA	AA	AG	AA	GG	GG	GG	AA	AA	GG	GG	AA	GG	GG	GG	GG	AA	GG	AA	GG	AA	--	AG	AA	GG	GG	AA	AA	AA	--	GG	AA	AA	GG	AA	AA	AA	GG	AG	AA	GG	GG	GG	--	GG	AA	AA
Gm10_48111404_A_G	Gm10	48707094	GG	GG	GG	GG	AA	AA	AA	GG	GG	AA	AA	GG	AA	AA	AA	AA	GG	AA	GG	AA	GG	AA	GG	GG	AA	AA	GG	GG	GG	AG	AA	GG	GG	AA	GG	GG	GG	AA	--	GG	AA	AA	AA	GG	AA	GG	GG
Gm10_48265015_A_G	Gm10	48860704	GG	GG	GG	GG	AA	AA	AA	GG	GG	AA	AA	GG	AA	AA	AA	AA	GG	AA	GG	AA	GG	AA	GG	GG	AA	AA	GG	GG	GG	AG	AA	GG	GG	AA	GG	GG	GG	AA	--	GG	AA	AA	AA	GG	AA	GG	GG
Gm10_48331152_G_A	Gm10	48926841	AA	AA	AA	AA	GG	GG	GG	AA	AA	GG	GG	AA	GG	GG	GG	GG	AA	GG	AA	GG	AA	--	AA	AA	GG	GG	AA	AA	AA	--	GG	AA	AA	GG	AA	GG	AA	GG	AA	AA	GG	GG	GG	AA	GG	AA	AA
Gm10_48426970_A_G	Gm10	49022659	GG	GG	GG	GG	AA	AA	AA	GG	GG	AA	AA	GG	AA	AA	AA	AA	GG	AA	GG	AA	GG	AA	GG	GG	AA	AA	GG	GG	GG	AG	AA	GG	GG	AA	GG	AA	GG	AA	--	GG	AA	AA	AA	GG	AA	GG	GG
Gm10_49447586_C_T	Gm10	50044631	TT	TT	TT	TT	TT	CC	TT	TT	TT	TT	TT	TT	CC	CC	CC	CC	CC	CC	CC	CC	CC	CC	--	TT	CC	CC	TT	TT	TT	CC	TT	TT	TT	TT	TT	CC	TT	TT	TC	TT	CC	CC	TT	TT	TT	TT	TT
Gm10_49559305_A_G	Gm10	50156350	GG	GG	GG	GG	GG	AA	GG	GG	GG	GG	GG	GG	AA	AA	AA	AA	AA	AA	AA	AA	AA	AA	GG	GG	AA	AA	GG	GG	GG	AA	GG	GG	GG	GG	GG	AA	GG	GG	GG	GG	AA	AA	GG	GG	GG	GG	GG
Gm10_49630664_C_T	Gm10	50227775	TT	TT	TT	TT	TT	CC	TT	TT	TT	TT	TT	TT	CC	CC	CC	CC	CC	CC	CC	CC	CC	CC	TT	TT	CC	CC	TT	TT	TT	CC	TT	TT	TT	TT	TT	CC	TT	TT	TT	TT	CC	CC	TT	TT	TT	TT	TT
Gm10_49967536_T_C	Gm10	50564648	CC	CC	CC	CC	CC	CC	CC	CC	CC	CC	CC	CC	CC	CC	CC	CC	CC	CC	CC	CC	CC	CC	CC	CC	CC	CC	CC	CC	CC	CC	CC	CC	CC	CC	CC	CC	CC	CC	CC	CC	CC	CC	CC	CC	CC	CC	CC
Gm11_423298_C_T	Gm11	432285	CC	TT	--	TT	TT	--	TT	TT	CC	TT	TT	CC	CC	CC	TT	TT	TT	CC	CC	TT	CC	CC	--	CC	TT	TT	CC	CC	--	TT	CC	CC	CC	CC	CC	TC	TT	TT	TT	TT	CC	TT	TT	TC	TT	TT	TT
Gm11_571208_A_C	Gm11	580183	AA	--	--	CC	CC	--	CC	CC	AA	CC	CC	AA	AA	AA	CC	CC	CC	AA	AA	CC	AA	AA	--	AA	CC	--	AA	AA	--	CC	AA	AA	AA	AA	AA	AC	CC	CC	CC	CC	AA	CC	CC	AC	CC	CC	CC
Gm11_614313_A_G	Gm11	623288	AA	GG	--	GG	GG	--	GG	GG	AA	GG	GG	AA	AA	AA	GG	GG	GG	AA	AA	GG	AA	AA	--	AA	GG	GG	AA	AA	AG	GG	AA	AA	AA	AA	AA	--	GG	GG	GG	GG	AA	GG	GG	AG	GG	GG	GG
Gm11_1055471_G_A	Gm11	1064453	GG	GG	GG	GG	GG	GG	GG	GG	GG	GG	GG	GG	GG	GG	GG	GG	GG	GG	GG	GG	GG	GG	GG	GG	GG	GG	GG	GG	GG	GG	GG	GG	GG	GG	GG	GG	GG	GG	GG	GG	GG	GG	GG	GG	GG	GG	GG
Gm11_1093109_T_G	Gm11	1102059	TT	TT	TT	TT	TT	TT	TT	TT	TT	TT	TT	TT	TT	TT	TT	TT	TT	TT	TT	TT	TT	TT	TT	TT	TT	TT	TT	TT	TT	TT	TT	TT	TT	TT	TT	TT	TT	TT	TT	TT	TT	TT	TT	TT	TT	TT	TT
Gm11_1874390_T_G	Gm11	1882993	TT	TT	TT	TT	TT	TT	TT	TT	TT	TT	TT	TT	TT	TT	TT	TT	TT	TT	TT	TT	TT	TT	TT	TT	TT	TT	TT	TT	TT	TT	TT	TT	TT	TT	TT	TT	TT	TT	TT	TT	TT	TT	TT	TT	TT	TT	TT
Gm11_2092125_G_A	Gm11	2100501	GG	GG	GG	GG	GG	GG	GG	GG	GG	GG	GG	GG	GG	GG	GG	GG	GG	GG	GG	GG	GG	GG	GG	GG	GG	GG	GG	GG	GG	GG	GG	GG	GG	GG	GG	GG	GG	GG	GG	GG	GG	GG	GG	GG	GG	GG	GG
Gm11_2625440_A_G	Gm11	2633828	AA	AA	AA	AA	AA	AA	AA	AA	AA	AA	AA	AA	AA	AA	AA	AA	AA	AA	AA	AA	AA	AA	AA	AA	AA	AA	AA	AA	AA	AA	AA	AA	AA	AA	AA	AA	AA	AA	AA	AA	AA	AA	AA	AA	AA	AA	AA
Gm11_2777893_A_C	Gm11	2786281	AA	AA	AA	AA	AA	AA	AA	AA	AA	AA	AA	AA	AA	AA	AA	AA	AA	AA	AA	AA	AA	AA	AA	AA	AA	AA	AA	AA	AA	AA	AA	AA	AA	AA	AA	AA	AA	AA	AA	AA	AA	AA	AA	AA	AA	AA	AA
Gm11_3432665_A_G	Gm11	3441553	--	AA	GG	AA	GG	GG	AA	GG	GG	AA	AA	GG	AA	GG	AA	AA	AA	GG	AA	AA	GG	GG	--	AA	AA	--	GG	GG	GG	AA	GG	AA	AA	GG	AA	GG	GG	GG	--	AG	AA	GG	AA	--	AA	GG	AA
Gm11_3754670_C_T	Gm11	3764301	CC	CC	TT	CC	TT	TT	CC	TT	TT	CC	CC	TT	CC	TT	CC	CC	CC	TT	CC	CC	TT	TT	TC	CC	CC	CC	TT	TT	TT	CC	TT	CC	CC	TT	CC	TT	TT	TT	CC	--	CC	TT	CC	CC	CC	TT	CC
Gm11_3856937_G_T	Gm11	3866567	--	GG	TT	GG	TT	TT	GG	TT	TT	GG	GG	TT	GG	TT	GG	GG	GG	TT	GG	GG	TT	TT	--	GG	GG	--	TT	TT	TT	GG	TT	GG	GG	TT	GG	TT	TT	TT	GG	TG	GG	TT	GG	--	GG	TT	GG
Gm11_3950213_T_C	Gm11	3959854	TC	TT	CC	TT	CC	CC	TT	CC	CC	TT	TT	CC	TT	CC	TT	TT	TT	CC	--	TT	CC	CC	--	--	TT	--	CC	CC	CC	TT	CC	TT	TT	CC	TT	CC	CC	CC	--	TC	TT	CC	TT	TC	TT	CC	TT
Gm11_4094763_A_G	Gm11	4104444	AA	AA	AA	AA	GG	AA	AA	GG	GG	AA	AA	AA	AA	GG	AA	AA	AA	GG	AA	AA	AA	GG	GG	AA	AA	AA	GG	AA	AA	AA	GG	AA	AA	AA	AA	AA	GG	GG	AA	--	AA	GG	AA	AA	AA	GG	AA
Gm11_4135246_C_T	Gm11	4144927	CC	CC	CC	CC	CC	CC	CC	CC	CC	CC	CC	CC	CC	CC	CC	CC	CC	CC	CC	CC	CC	CC	CC	CC	CC	CC	CC	CC	CC	CC	CC	CC	CC	CC	CC	CC	CC	CC	CC	CC	CC	CC	CC	CC	CC	CC	CC
Gm11_4216279_A_G	Gm11	4225960	AA	AA	AA	AA	GG	AA	AA	GG	GG	AA	AA	AA	AA	GG	AA	AA	AA	GG	AA	AA	AA	GG	GG	AA	AA	AA	GG	AA	AA	AA	GG	AA	AA	AA	AA	AA	GG	GG	AA	AG	AA	GG	AA	AA	AA	GG	AA
Gm11_4329480_T_C	Gm11	4338907	TT	TT	TT	TT	CC	TT	TT	CC	CC	TT	TT	TT	TT	CC	TT	TT	TT	CC	TT	TT	TT	CC	CC	TT	TT	TT	CC	TT	TT	TT	CC	TT	TT	TT	TT	TT	CC	CC	TT	TC	TT	CC	TT	TT	TT	CC	TT
Gm11_4345198_G_A	Gm11	4354625	AG	AG	AG	AG	AA	AG	AG	AA	AA	AG	AG	GG	AG	AA	--	AG	AG	AA	AG	AG	AG	AA	--	AG	--	--	AA	GG	AG	AG	AA	AG	AG	AG	--	AG	AA	AA	AG	--	AG	AA	--	--	AG	AA	AG
Gm11_4453218_T_C	Gm11	4462645	TT	TT	TT	TT	CC	TT	TT	CC	CC	TT	TT	TT	TT	CC	TT	TT	TT	--	--	TT	TT	CC	TC	TT	TT	TT	CC	TT	--	TT	CC	TT	TT	TT	TT	TT	CC	CC	TT	--	TT	--	TT	--	TT	CC	TT
Gm11_4519147_C_A	Gm11	4528574	CC	CC	CC	CC	AA	CC	AA	AA	AA	CC	CC	CC	CC	AA	CC	CC	CC	AA	CC	CC	CC	AA	--	CC	CC	CC	AA	CC	--	CC	AA	CC	CC	CC	CC	CC	AA	AA	CC	AC	CC	AA	CC	CC	CC	AA	CC
Gm11_4702578_C_A	Gm11	4712175	AA	AA	AA	AA	CC	AA	CC	CC	CC	AC	AA	AA	AA	CC	AA	AA	AA	CC	AC	AA	AA	CC	CC	--	--	AA	CC	AA	AC	AA	CC	CC	AA	AA	AA	AA	CC	CC	AA	--	AA	CC	AC	AC	AA	CC	AA
Gm11_4796577_A_C	Gm11	4806173	AA	AA	AA	AA	AA	AA	AA	AA	AA	AA	AA	AA	AA	AA	AA	AA	AA	AA	AA	AA	AA	AA	AA	AA	AA	AA	AA	AA	AA	AA	AA	AA	AA	AA	AA	AA	AA	AA	AA	AA	AA	AA	AA	AC	AA	AA	AA
Gm11_4961902_C_T	Gm11	4971452	CC	CC	CC	CC	TT	CC	CC	TT	TT	CC	CC	CC	CC	TT	CC	CC	CC	TT	CC	CC	CC	TT	TC	CC	CC	CC	CC	CC	--	CC	--	TT	CC	CC	CC	CC	TT	CC	CC	--	CC	TT	CC	--	CC	TT	CC
Gm11_5001720_T_C	Gm11	5011270	CC	CC	CC	CC	TT	CC	CC	TT	TT	CC	CC	CC	CC	TT	CC	CC	CC	--	CC	CC	CC	TC	TC	CC	CC	CC	CC	CC	CC	CC	CC	TT	CC	CC	CC	CC	TT	CC	CC	--	CC	TC	CC	CC	CC	TT	CC
Gm11_5065170_G_A	Gm11	5074720	GG	GG	GG	GG	AA	GG	GG	AA	AA	GG	GG	GG	GG	AA	GG	GG	GG	--	GG	GG	GG	AG	AG	GG	GG	GG	GG	GG	--	GG	GG	AA	GG	GG	GG	GG	AA	GG	GG	--	GG	AG	GG	GG	GG	AA	GG
Gm11_5536036_C_A	Gm11	5545123	CC	CC	CC	CC	CC	CC	CC	CC	CC	CC	CC	CC	CC	CC	CC	CC	CC	CC	CC	CC	CC	CC	CC	CC	CC	CC	CC	CC	CC	CC	CC	CC	CC	CC	CC	CC	CC	CC	CC	CC	CC	CC	CC	CC	CC	CC	CC
Gm11_6232705_A_C	Gm11	6242845	CC	AA	CC	CC	CC	CC	CC	AA	CC	CC	CC	AA	CC	CC	CC	CC	CC	CC	CC	CC	CC	AA	CC	CC	CC	AA	CC	CC	AA	CC	CC	CC	CC	AA	CC	AA	CC	CC	CC	CC	AA	CC	CC	--	CC	CC	CC
Gm11_6332303_A_G	Gm11	6342443	GG	AA	GG	GG	GG	GG	GG	AA	GG	GG	GG	--	GG	GG	GG	GG	GG	GG	GG	GG	GG	AA	GG	AA	GG	AA	GG	GG	AA	GG	GG	GG	GG	AA	GG	AA	GG	GG	GG	GG	AA	GG	GG	GG	GG	GG	GG
Gm11_6383207_G_A	Gm11	6393348	AA	GG	AA	AA	AA	AA	AA	GG	AA	AA	AA	--	AA	AA	AA	AA	AA	AA	AA	AA	AA	GG	AA	GG	AA	GG	AA	AA	--	AA	AA	AA	AA	GG	AA	GG	AA	AA	AA	AA	GG	AA	AA	--	AA	AA	AA
Gm11_6555265_A_G	Gm11	6565408	AA	AA	AA	AA	AA	AA	AA	AA	AA	AA	AA	AA	AA	AA	AA	AA	AA	AA	AA	AA	AA	AA	AA	AA	AA	AA	AA	AA	AA	AA	AA	AA	AA	AA	AA	AA	AA	AA	AA	AA	AA	AA	AA	AG	AA	AA	AA
Gm11_6882885_T_G	Gm11	6892876	GG	GG	GG	GG	GG	GG	GG	GG	GG	GG	GG	GG	GG	TT	GG	GG	GG	TG	GG	GG	GG	GG	--	GG	GG	GG	GG	GG	GG	GG	GG	GG	GG	GG	GG	GG	TT	GG	GG	TT	GG	TT	GG	GG	GG	TT	GG
Gm11_6901726_C_T	Gm11	6911717	TT	TT	TT	TT	TT	TT	TT	TT	TT	TT	TT	TT	TT	CC	TT	TT	TT	CC	TT	TT	TT	TT	CC	TT	TT	TT	TT	TT	TT	TT	TT	TT	TT	TT	TT	TT	CC	TT	TT	CC	TT	CC	TT	TT	TT	CC	TT
Gm11_6906614_A_G	Gm11	6916605	GG	GG	GG	GG	GG	GG	GG	GG	GG	GG	GG	GG	GG	AA	GG	GG	GG	AA	GG	GG	GG	GG	AA	GG	GG	GG	GG	GG	GG	GG	GG	GG	GG	GG	GG	GG	AA	GG	GG	AA	GG	AA	GG	GG	GG	AA	GG
Gm11_7243925_T_C	Gm11	7253927	TT	CC	TT	TT	TT	TT	TT	CC	TT	TT	TT	--	TT	TT	TT	TT	TT	TT	TT	TT	TT	CC	TT	CC	TT	CC	TT	TT	CC	TT	TT	TT	TT	CC	TT	TT	TT	TT	TT	TT	CC	TT	TT	TT	TT	TT	TT
Gm11_7358578_C_T	Gm11	7368580	CC	TT	CC	CC	CC	CC	CC	TT	CC	CC	CC	--	CC	CC	CC	CC	CC	CC	CC	CC	CC	TT	CC	TT	CC	TT	CC	CC	TT	CC	CC	CC	CC	TT	CC	CC	CC	CC	CC	CC	TT	CC	CC	CC	CC	CC	CC
Gm11_7596095_C_T	Gm11	7606123	CC	TT	CC	CC	CC	CC	CC	TT	CC	CC	CC	TT	CC	CC	CC	CC	CC	CC	CC	CC	CC	TT	CC	TT	CC	TT	CC	CC	TT	CC	CC	CC	CC	TT	CC	CC	CC	CC	CC	CC	TT	CC	CC	CC	CC	CC	CC
Gm11_7843684_C_T	Gm11	7854392	--	TT	--	CC	CC	CC	CC	TT	CC	TT	TT	TC	CC	TT	CC	--	CC	TT	CC	CC	CC	TT	TC	TT	CC	TT	CC	CC	TC	CC	CC	CC	CC	TT	CC	CC	TT	CC	TT	--	TT	TT	TT	--	TT	TT	TT
Gm11_7934621_G_A	Gm11	7945234	AA	AA	AA	AA	AA	AA	AA	AA	AA	GG	GG	AA	AA	GG	AA	AA	AA	GG	AA	AA	AA	AA	GG	AA	AA	AA	AA	AA	AA	AA	AA	AA	AA	AA	AA	AA	GG	AA	GG	AG	AA	GG	GG	AG	GG	GG	GG
Gm11_7983593_A_C	Gm11	7994204	AC	CC	AC	AA	AA	--	AA	CC	AC	CC	CC	CC	AA	CC	AA	AC	AA	CC	AC	AA	AA	CC	CC	CC	AC	CC	AA	AA	CC	AA	AC	AA	AA	CC	AA	AA	CC	AA	CC	--	CC	CC	CC	--	CC	CC	CC
Gm11_8039969_A_G	Gm11	8050544	AA	GG	GG	AA	AA	GG	AA	GG	AA	GG	GG	GG	AA	GG	GG	GG	AA	GG	AA	GG	AA	GG	--	GG	AA	GG	AA	AA	GG	AA	--	AA	AA	GG	AA	GG	GG	AA	GG	--	GG	GG	GG	AG	GG	GG	GG
Gm11_8095797_G_A	Gm11	8106372	GG	AA	AA	GG	GG	AA	GG	AA	GG	AA	AA	--	GG	AA	AA	AA	GG	AA	GG	AA	GG	AA	AG	AA	GG	AA	GG	GG	--	GG	GG	GG	GG	AA	GG	AA	AA	GG	AA	AG	AA	AA	AA	--	AA	AA	AA
Gm11_8185486_G_A	Gm11	8195937	AA	AA	GG	AA	AA	GG	AA	AA	AA	AA	AA	AA	AA	AA	GG	GG	AA	AA	AA	GG	AA	AA	AA	AA	AA	AA	AA	AA	AA	AA	AA	AA	AA	AA	AA	GG	AA	AA	AA	AA	AA	AA	AA	AA	AA	AA	AA
Gm11_8237055_T_G	Gm11	8247504	GG	GG	TT	GG	GG	TT	GG	GG	GG	GG	GG	GG	GG	GG	TT	TT	GG	GG	GG	TT	GG	GG	GG	GG	GG	GG	GG	GG	GG	GG	GG	GG	GG	GG	GG	TT	GG	GG	GG	GG	GG	GG	GG	GG	GG	GG	GG
Gm11_8556791_G_A	Gm11	8567240	AG	GG	--	AA	AA	AA	AA	GG	AA	GG	GG	GG	AA	GG	AA	--	AA	GG	AA	AA	AA	GG	--	--	AA	GG	AA	AA	GG	AA	--	AA	AA	GG	AA	AA	GG	AA	GG	AG	GG	GG	GG	AG	GG	GG	GG
Gm11_9038408_C_A	Gm11	9057723	AC	AA	--	CC	CC	CC	CC	AA	CC	AA	AA	--	CC	AA	CC	--	CC	AA	CC	CC	CC	AA	--	--	AA	AA	CC	CC	--	CC	CC	AA	CC	AA	CC	CC	AA	CC	AA	CC	AA	AA	AA	AC	AA	AA	AA
Gm11_9666296_T_G	Gm11	9695622	TT	TT	TT	TT	TT	TT	TT	GG	TT	TT	TT	TT	TT	TT	TT	TT	TT	TT	TT	TT	TT	GG	TT	TG	TT	TT	TT	TT	TT	TT	TT	GG	TT	TT	TT	TT	TT	TT	TT	TT	TT	TT	TT	TT	TT	TT	TT
Gm11_10060565_A_G	Gm11	10091012	AA	AA	AA	AA	AA	AA	AA	GG	AA	AA	AA	AA	AA	AA	AA	AA	AA	AA	AA	AA	AA	GG	AA	GG	AA	AA	AA	AA	AA	AA	AA	GG	AA	AA	AA	AA	AA	AA	AA	AA	AA	AA	AA	AA	AA	AA	AA
Gm11_10360391_G_A	Gm11	10391700	AA	AA	AA	AA	AA	AA	AA	GG	AA	AA	AA	AA	AA	AA	AA	AA	AA	AA	AA	AA	AA	GG	AA	AG	AA	AA	AA	AA	AA	AA	AA	GG	AA	AA	AA	AA	AA	AA	AA	AA	AA	AA	AA	AA	AA	AA	AA
Gm11_10446473_A_G	Gm11	10477945	GG	GG	GG	GG	GG	GG	GG	AA	GG	GG	GG	GG	GG	GG	GG	GG	GG	GG	GG	GG	GG	AA	GG	AG	GG	GG	GG	GG	GG	GG	GG	AA	GG	GG	GG	GG	GG	GG	GG	GG	GG	GG	GG	GG	GG	GG	GG
Gm11_10509014_T_C	Gm11	10540668	CC	CC	CC	CC	CC	CC	CC	TT	CC	CC	CC	CC	CC	CC	CC	CC	CC	CC	CC	CC	CC	TT	CC	--	CC	CC	CC	CC	CC	CC	CC	TT	CC	CC	CC	CC	CC	CC	CC	CC	CC	CC	CC	CC	CC	CC	CC
Gm11_10721006_A_G	Gm11	10752462	GG	GG	GG	GG	GG	GG	GG	AG	GG	GG	GG	GG	GG	GG	GG	GG	GG	GG	GG	GG	GG	AG	GG	AG	GG	GG	GG	GG	GG	GG	GG	AG	GG	GG	GG	GG	GG	GG	GG	GG	GG	GG	GG	GG	GG	GG	GG
Gm11_10847172_T_C	Gm11	10878645	CC	CC	CC	CC	CC	CC	CC	TT	CC	CC	CC	CC	CC	CC	CC	CC	CC	CC	CC	CC	CC	TT	CC	--	CC	CC	CC	CC	CC	CC	CC	TT	CC	CC	CC	CC	CC	CC	CC	CC	CC	CC	CC	CC	CC	CC	CC
Gm11_10926986_T_C	Gm11	10958741	CC	CC	CC	CC	CC	CC	CC	TT	CC	CC	CC	CC	CC	CC	CC	CC	CC	CC	CC	CC	CC	TT	CC	TC	CC	CC	CC	CC	CC	CC	CC	TT	CC	CC	CC	CC	CC	CC	CC	CC	CC	CC	CC	CC	CC	CC	CC
Gm11_10999596_T_C	Gm11	11031273	CC	CC	CC	CC	CC	CC	CC	TT	CC	CC	CC	CC	CC	CC	CC	CC	CC	CC	CC	CC	CC	TT	CC	TC	CC	CC	CC	CC	CC	CC	CC	TT	CC	CC	CC	CC	CC	CC	CC	CC	CC	CC	CC	CC	CC	CC	CC
Gm11_17237725_G_A	Gm11	11133013	--	GG	AG	--	AA	GG	AA	GG	AA	GG	AG	AA	GG	AA	AA	AA	--	GG	AG	AA	AA	GG	GG	GG	GG	GG	AA	AA	GG	AA	GG	GG	AA	GG	AA	--	AA	AA	AA	AA	GG	--	AA	AA	AA	AA	AA
Gm11_17318773_A_C	Gm11	11214061	CC	CC	CC	CC	CC	CC	CC	CC	CC	CC	CC	CC	CC	CC	CC	CC	CC	CC	CC	CC	CC	CC	CC	CC	CC	CC	CC	CC	CC	CC	CC	CC	CC	CC	CC	CC	CC	CC	CC	CC	CC	CC	CC	CC	CC	CC	CC
Gm11_17462922_A_G	Gm11	11358906	GG	GG	GG	GG	GG	GG	GG	GG	GG	GG	GG	GG	GG	GG	GG	GG	GG	GG	GG	GG	GG	GG	GG	GG	GG	GG	GG	GG	GG	GG	GG	GG	GG	GG	GG	GG	GG	GG	GG	GG	GG	GG	GG	GG	GG	GG	GG
Gm11_17531261_C_A	Gm11	11428446	AA	AA	AA	AA	AA	AA	AA	AA	AA	AA	AA	AA	AA	AA	AA	AA	AA	AA	AA	AA	AA	AA	AA	AA	AA	AA	AA	AA	AA	AA	AA	AA	AA	AA	AA	AA	AA	AA	AA	AA	AA	AA	AA	AA	AA	AA	AA
Gm11_17607681_A_G	Gm11	11504868	AG	AA	GG	GG	GG	AA	GG	AA	GG	AA	GG	GG	--	GG	GG	GG	AG	AA	GG	GG	GG	AA	AA	AA	AA	AA	AG	GG	AA	AA	AA	AA	GG	AA	AG	GG	GG	GG	GG	GG	AA	GG	GG	GG	GG	GG	GG
Gm11_17645767_C_T	Gm11	11542956	--	CC	TC	TC	TC	CC	TT	CC	TT	CC	TC	TT	--	TT	TT	TT	CC	CC	TC	TT	TC	CC	CC	CC	CC	CC	CC	TT	CC	CC	CC	CC	TT	CC	CC	TC	TT	TT	TT	TT	CC	--	TT	TT	TT	TT	TT
Gm11_17988599_A_G	Gm11	11884947	--	AA	GG	GG	GG	--	GG	AA	GG	--	GG	GG	--	GG	GG	GG	--	AA	GG	GG	GG	AA	AG	AA	AA	AA	--	GG	AA	AA	AG	AA	GG	AA	AG	GG	GG	GG	GG	GG	--	GG	GG	GG	GG	GG	GG
Gm11_18083338_T_C	Gm11	11983839	TC	TT	CC	CC	CC	TT	CC	TT	CC	TT	CC	CC	--	CC	CC	CC	TC	TT	CC	CC	CC	TT	TT	TT	TT	TT	TC	CC	TT	TT	TT	TT	CC	TT	--	CC	CC	CC	CC	CC	TT	CC	CC	CC	CC	CC	CC
Gm11_24186948_A_C	Gm11	13718964	AA	AA	AA	AA	AA	AA	AA	AA	AA	AA	AA	AA	AA	AA	AA	AA	AA	AA	AA	AA	AA	AA	AA	AA	AA	AA	AA	AA	AA	AA	AA	AA	AA	AA	AA	AA	AA	AA	AA	AA	AA	AA	AA	AA	AA	AA	AA
Gm11_24299777_A_G	Gm11	13831823	AG	GG	AA	AA	AA	GG	AA	GG	AA	GG	AA	AA	AG	GG	AA	AA	AG	GG	AA	AA	AA	GG	GG	GG	GG	GG	AG	AA	GG	GG	GG	GG	AA	GG	AG	AA	AA	AA	AA	AA	GG	AA	AA	AA	AA	AA	AA
Gm11_30902153_T_C	Gm11	14909065	TC	CC	TT	TT	TT	CC	TT	CC	TT	CC	TT	TT	--	CC	TT	TT	TC	CC	TT	TT	TT	CC	CC	CC	CC	CC	TC	TT	CC	CC	CC	CC	TT	CC	TC	TT	TT	TT	TT	TT	CC	TT	TT	TT	TT	TT	TT
Gm11_30588492_T_G	Gm11	15221133	TG	GG	TT	TT	TT	GG	TT	GG	TT	GG	TT	TT	--	GG	TT	TT	--	GG	TT	TT	TT	GG	GG	GG	GG	GG	TG	TT	GG	GG	GG	GG	TT	GG	TG	--	TT	TT	TT	TT	GG	TT	TT	TT	TT	TT	TT
Gm11_30114058_A_G	Gm11	15694871	AG	AA	GG	GG	GG	AA	GG	AA	AA	AA	GG	GG	--	AA	GG	GG	--	AA	GG	GG	GG	AA	AA	AA	AA	AA	AG	GG	AA	AA	--	AA	GG	AA	AG	GG	GG	GG	GG	GG	AA	GG	GG	GG	GG	GG	GG
Gm11_29678792_C_A	Gm11	16146461	--	AA	CC	CC	CC	--	CC	AA	AA	--	CC	CC	--	AA	CC	CC	--	AA	CC	CC	CC	AA	--	AA	AA	AA	AC	CC	AA	AA	AC	AA	CC	AA	AC	CC	CC	CC	CC	CC	--	CC	CC	CC	CC	CC	CC
Gm11_27494790_T_C	Gm11	18321103	TC	TC	TC	TT	TT	TC	TT	TC	TT	TT	TT	CC	TT	TT	TC	TT	TC	TC	TC	TC	TT	TT	TT	TT	TC	TT	TC	TT	TT	TT	TT	TC	TT	TC	TC	TT	TT	TT	TT	TT	TC	TT	TT	TT	TT	TT	TT
Gm11_23209753_T_C	Gm11	24088624	TT	TT	CC	TT	CC	TT	TT	TT	TT	TT	TT	CC	--	TT	CC	CC	--	TT	CC	CC	CC	TT	TT	TT	TT	--	TC	CC	TT	TT	TT	TT	CC	TT	--	CC	CC	TT	TT	CC	TT	CC	TT	--	TT	CC	TT
Gm11_14896456_G_A	Gm11	24398311	GG	GG	GG	GG	GG	GG	GG	GG	GG	GG	GG	GG	GG	GG	GG	GG	GG	GG	GG	GG	GG	GG	GG	GG	GG	GG	GG	GG	GG	GG	GG	GG	GG	GG	GG	GG	GG	GG	GG	GG	GG	GG	GG	GG	GG	GG	GG
Gm11_14951565_C_T	Gm11	24456157	--	CC	TT	TT	TT	CC	TT	CC	TT	CC	TT	CC	TC	CC	TT	TT	TT	CC	TT	TT	TT	CC	CC	CC	CC	CC	TT	TT	CC	TT	CC	CC	TT	CC	TT	TT	TT	CC	TT	TC	CC	CC	CC	TC	CC	TT	TT
Gm11_15000789_T_C	Gm11	24505381	TC	TT	CC	CC	CC	TT	CC	TT	CC	TT	CC	TT	TC	TT	CC	CC	CC	TT	CC	CC	CC	TT	TT	TT	TT	TT	CC	CC	TT	CC	TT	TT	CC	TT	CC	CC	CC	TT	CC	TC	TT	TT	TT	TC	TT	CC	CC
Gm11_15558504_T_C	Gm11	25067208	TC	TT	CC	CC	CC	TT	CC	TT	CC	TT	CC	TT	TT	CC	CC	CC	CC	TT	CC	CC	CC	TT	TT	TT	TT	TT	CC	CC	TT	CC	TT	TT	CC	TT	CC	CC	CC	TT	CC	TC	TT	CC	TT	--	TT	CC	CC
Gm11_15739122_G_A	Gm11	25247264	--	GG	AA	AA	AA	GG	AA	GG	AA	--	AA	GG	GG	AA	AA	AA	AA	GG	AA	AA	AA	--	GG	GG	GG	GG	AA	AA	--	AA	GG	GG	AA	GG	AA	AA	AA	GG	AA	--	GG	AA	--	--	GG	AA	AA
Gm11_31989879_A_G	Gm11	25906288	AG	GG	AA	AA	AA	GG	AA	GG	AA	GG	AA	GG	GG	AA	AA	AA	AA	GG	AA	AA	AA	GG	GG	GG	GG	GG	AA	AA	GG	AA	GG	GG	AA	GG	AA	AA	AA	GG	AA	AG	GG	AA	GG	--	GG	AA	AA
Gm11_16109471_T_C	Gm11	26075475	--	TT	CC	CC	CC	TT	CC	TT	CC	TT	CC	TT	TT	CC	CC	CC	CC	TT	CC	CC	CC	TT	TT	TT	TT	TT	CC	CC	--	CC	TT	TT	CC	TT	CC	CC	CC	CC	CC	--	TT	CC	TT	--	TT	CC	CC
Gm11_16165070_T_G	Gm11	26131251	--	TT	GG	GG	GG	--	GG	TT	GG	TG	GG	TT	TT	GG	GG	GG	GG	TT	GG	GG	GG	TG	--	TT	TT	TT	GG	GG	TG	GG	TG	TT	GG	TT	GG	GG	GG	GG	GG	--	TT	GG	TG	--	TT	GG	GG
Gm11_16202963_G_A	Gm11	26169302	AG	GG	AA	AA	AA	GG	AA	GG	AA	GG	AA	GG	GG	AA	AA	AA	AA	GG	AA	AA	AA	GG	GG	GG	GG	GG	AA	AA	GG	AA	GG	GG	AA	GG	AA	AA	AA	AA	AA	AG	GG	AA	GG	--	GG	AA	AA
Gm11_16492046_A_G	Gm11	26458968	AA	AA	AA	AA	AA	AA	AA	AA	AA	AA	AA	AA	AA	AA	AA	AA	AA	AA	AA	AA	AA	AA	AA	AA	AA	AA	AA	AA	AA	AA	AA	AA	AA	AA	AA	AA	AA	AA	AA	AA	AA	AA	AA	AA	AA	AA	AA
Gm11_17116826_T_C	Gm11	27088134	TT	TT	TT	TT	TT	TT	TT	TT	TT	TT	TT	TT	TT	TT	TT	TT	TT	TT	TT	TT	TT	TT	TT	TT	TT	TT	TT	TT	TT	TT	TT	TT	TT	TT	TT	TT	TT	TT	TT	TT	TT	TT	TT	TT	TT	TT	TT
Gm11_32839864_A_C	Gm11	28002720	AA	AA	CC	AA	AA	AA	AA	AA	CC	AA	AA	CC	AC	AA	AC	CC	AC	AA	CC	CC	CC	AA	AA	AA	AA	AC	AC	CC	AA	AA	AA	AA	CC	AA	AC	CC	CC	AA	AA	CC	AA	CC	AA	--	AA	CC	AA
Gm11_32910236_A_G	Gm11	28082094	AA	AA	GG	AA	AA	AA	AA	AA	GG	AA	AA	GG	AG	AA	AG	GG	--	AA	GG	GG	GG	AA	AA	AA	AA	AG	AG	GG	AA	AA	AA	AA	GG	AA	AG	GG	GG	AA	AA	GG	AA	GG	AA	--	AA	GG	AA
Gm11_33511924_C_T	Gm11	28686199	TT	TT	TT	TT	TT	TT	TT	TT	TT	TT	TT	TT	TT	TT	TT	TT	TT	TT	TT	TT	TT	TT	TT	TT	TT	TT	TT	TT	TT	TT	TT	TT	TT	TT	TT	TT	TT	TT	TT	TT	TT	TT	TT	TT	TT	TT	TT
Gm13_25271849_T_G	Gm11	30454098	GG	--	GG	GG	TT	TG	GG	--	TT	GG	GG	TT	TT	GG	GG	--	GG	TT	GG	GG	GG	TT	GG	TT	TT	GG	TT	GG	TT	GG	GG	TT	TT	TT	TT	TT	GG	GG	--	GG	TT	GG	GG	TG	GG	GG	GG
Gm11_36404950_G_A	Gm11	31929823	GG	GG	GG	GG	GG	GG	GG	GG	GG	GG	GG	GG	GG	GG	GG	GG	GG	GG	GG	GG	GG	GG	GG	GG	GG	GG	GG	GG	GG	GG	GG	GG	GG	GG	GG	GG	GG	GG	GG	GG	GG	GG	GG	GG	GG	GG	GG
Gm11_36733260_C_A	Gm11	32276359	CC	CC	CC	CC	CC	CC	CC	CC	CC	CC	CC	CC	CC	CC	CC	CC	CC	CC	CC	CC	CC	CC	CC	CC	CC	CC	CC	CC	CC	CC	CC	CC	CC	CC	CC	CC	CC	CC	CC	CC	CC	CC	CC	CC	CC	CC	CC
Gm11_36890484_A_G	Gm11	32433567	AG	AA	GG	AA	AA	AA	AA	AA	GG	AA	AA	AA	AG	AA	GG	AA	GG	AA	GG	GG	GG	AA	--	GG	GG	GG	AG	GG	AA	GG	AA	AA	GG	AA	AG	GG	AA	AA	--	AA	--	GG	AA	AA	AA	AA	AA
Gm11_36931482_C_T	Gm11	32474474	TC	CC	--	CC	CC	CC	CC	CC	TT	CC	CC	CC	TC	CC	TT	CC	TT	CC	TT	TT	TT	CC	TC	TT	TT	TT	TC	TT	CC	TT	CC	CC	TT	CC	--	TT	CC	CC	CC	CC	CC	--	CC	CC	CC	CC	CC
Gm11_36976384_G_A	Gm11	32519376	GG	GG	GG	GG	GG	GG	GG	GG	GG	GG	GG	GG	GG	GG	GG	GG	GG	GG	GG	GG	GG	GG	GG	GG	GG	GG	GG	GG	GG	GG	GG	GG	GG	GG	GG	GG	GG	GG	GG	GG	GG	GG	GG	GG	GG	GG	GG
Gm11_37106045_C_T	Gm11	32654006	CC	CC	CC	CC	CC	CC	CC	CC	CC	CC	CC	CC	CC	CC	CC	CC	CC	CC	CC	CC	CC	CC	CC	CC	CC	CC	CC	CC	CC	CC	CC	CC	CC	CC	CC	CC	CC	CC	CC	CC	CC	CC	CC	CC	CC	CC	CC
Gm11_37179389_G_T	Gm11	32727353	GG	GG	GG	GG	GG	GG	GG	GG	GG	GG	GG	GG	GG	GG	GG	GG	GG	GG	GG	GG	GG	GG	GG	GG	GG	GG	GG	GG	GG	GG	GG	GG	GG	GG	GG	GG	GG	GG	GG	GG	GG	GG	GG	GG	GG	GG	GG
Gm11_37237023_G_T	Gm11	32784991	TG	GG	TT	TT	GG	GG	TT	GG	TT	TT	TG	TT	TG	GG	TT	GG	TT	GG	TT	TT	TT	GG	--	TT	TT	TT	TT	TT	GG	TT	GG	GG	TT	GG	TG	TT	GG	TG	TT	GG	GG	TT	TT	GG	TT	GG	TT
Gm11_37408299_G_A	Gm11	32959788	GG	GG	GG	GG	GG	GG	GG	GG	GG	GG	GG	GG	GG	GG	GG	GG	GG	GG	GG	GG	GG	GG	GG	GG	GG	GG	GG	GG	GG	GG	GG	GG	GG	GG	GG	GG	GG	GG	GG	GG	GG	GG	GG	GG	GG	GG	GG
Gm11_39108822_A_G	Gm11	33424559	AA	AA	AA	AA	AA	AA	AA	AA	AA	AA	AA	AA	AA	AA	AA	AA	AA	AA	AA	AA	AA	AA	AA	AA	AA	AA	AA	AA	AA	AA	AA	AA	AA	AA	AA	AA	AA	AA	AA	AA	AA	AA	AA	AA	AA	AA	AA
Gm11_39031139_T_C	Gm11	33502187	CC	CC	CC	CC	CC	CC	CC	CC	CC	CC	CC	CC	CC	CC	CC	CC	CC	CC	CC	CC	CC	CC	CC	CC	CC	CC	CC	CC	CC	CC	CC	CC	CC	CC	CC	CC	CC	CC	CC	CC	CC	CC	CC	CC	CC	CC	CC
Gm11_38892011_G_A	Gm11	33641304	GG	AA	GG	GG	GG	AA	GG	AA	--	GG	GG	GG	AG	GG	GG	AA	GG	GG	GG	GG	GG	AA	--	GG	GG	GG	GG	GG	AG	GG	--	GG	GG	AA	AG	GG	GG	GG	GG	GG	GG	GG	GG	AG	GG	GG	GG
Gm11_38648336_A_G	Gm11	33885696	AA	AA	AA	AA	AA	AA	AA	AA	AA	AA	AA	AA	AA	AA	AA	AA	AA	AA	AA	AA	AA	AA	AA	AA	AA	AA	AA	AA	AA	AA	AA	AA	AA	AA	AA	AA	AA	AA	AA	AA	AA	AA	AA	AA	AA	AA	AA
Gm11_38424068_C_T	Gm11	34109876	TT	CC	TT	TT	CC	CC	TT	CC	TC	TT	TT	TC	TC	TT	TT	CC	TT	TT	TT	TT	TT	CC	CC	TT	CC	CC	TT	TT	CC	CC	TT	TT	TT	CC	TC	TT	TT	TT	TT	CC	CC	TT	TT	CC	TT	TT	TT
Gm11_38299330_T_G	Gm11	34234546	GG	TT	GG	GG	GG	TT	GG	TT	--	GG	GG	GG	GG	GG	GG	--	GG	GG	GG	GG	GG	TT	GG	GG	GG	TT	GG	GG	TG	GG	GG	GG	GG	TT	--	GG	GG	GG	GG	GG	TG	GG	GG	TG	GG	GG	GG
Gm11_38261784_G_A	Gm11	34272092	AA	GG	AA	AA	AA	GG	AA	GG	AG	AA	AA	--	AG	AA	AA	GG	AA	AA	AA	AA	AA	GG	AA	AA	AA	GG	AA	AA	GG	AA	AA	AA	AA	GG	AG	AA	AA	AA	AA	AA	GG	AA	AA	GG	AA	AA	AA
Gm11_38183607_G_A	Gm11	34350149	AA	GG	AA	AA	AA	GG	AA	GG	AG	AA	AA	--	AG	AA	AA	GG	AA	AA	AA	AA	AA	GG	AA	AA	AA	GG	AA	AA	GG	AA	AA	AA	AA	GG	AG	AA	AA	AA	AA	AA	GG	AA	AA	GG	AA	AA	AA
Gm11_38136659_T_C	Gm11	34397097	CC	TT	CC	CC	CC	TT	CC	TT	--	CC	CC	CC	--	CC	CC	--	CC	CC	CC	CC	CC	TT	CC	CC	CC	--	CC	CC	TC	CC	CC	CC	CC	TT	--	CC	CC	CC	CC	CC	TT	CC	CC	TC	CC	CC	CC
Gm11_38056078_C_T	Gm11	34477652	TT	TT	TT	TT	TT	TT	TT	TT	TT	TT	TT	TT	TT	TT	TT	TT	TT	TT	TT	TT	TT	TT	TT	TT	TT	TT	TT	TT	TT	TT	TT	TT	TT	TT	TT	TT	TT	TT	TT	TT	TT	TT	TT	TT	TT	TT	TT
Gm11_37978746_G_T	Gm11	34554985	TT	TT	TT	TT	TT	TT	TT	TT	TT	TT	TT	TT	TT	TT	TT	TT	TT	TT	TT	TT	TT	TT	TT	TT	TT	TT	TT	TT	TT	TT	TT	TT	TT	TT	TT	TT	TT	TT	TT	TT	TT	TT	TT	TT	TT	TT	TT
Gm11_37877507_G_A	Gm11	34656421	GG	AA	GG	GG	GG	AA	GG	AA	AG	GG	GG	GG	AG	GG	GG	AA	GG	GG	GG	GG	GG	AA	GG	GG	GG	AA	GG	GG	AA	GG	GG	GG	AA	AA	AG	--	GG	GG	GG	GG	AA	GG	GG	AA	GG	GG	GG
Gm12_82828_T_C	Gm12	87780	TT	TT	CC	CC	CC	CC	TT	TT	CC	TT	TT	TT	CC	TT	CC	CC	TT	TT	TT	TT	CC	CC	CC	TT	TT	TT	CC	TT	CC	CC	TT	TT	CC	CC	TT	CC	TT	CC	CC	TT	TT	TT	TT	CC	TT	TT	TT
Gm12_352935_G_A	Gm12	357905	AG	GG	--	AA	AA	AA	GG	GG	AA	GG	GG	GG	AA	GG	AA	AA	GG	GG	GG	GG	AA	AA	AA	GG	GG	GG	AA	GG	--	AA	GG	GG	AA	AA	GG	AA	GG	AA	AA	GG	GG	GG	GG	AG	GG	GG	GG
Gm12_405621_A_C	Gm12	410590	CC	AA	CC	CC	CC	CC	AA	AA	CC	AC	AA	AC	CC	AA	CC	CC	AA	AC	AC	AA	CC	CC	CC	AC	--	AA	CC	AA	CC	CC	AA	AA	CC	CC	AA	CC	AA	CC	CC	AA	AA	--	AC	CC	AA	AA	AA
Gm12_425751_C_A	Gm12	430719	AC	CC	AC	AA	AA	--	CC	CC	--	CC	CC	CC	AA	CC	AA	AA	CC	CC	CC	CC	AA	AA	AA	CC	CC	CC	AA	CC	AC	AA	CC	CC	AA	AA	CC	AA	CC	AA	AA	CC	CC	CC	CC	AC	CC	CC	CC
Gm12_553862_G_T	Gm12	558830	TT	GG	TT	TT	TT	TT	GG	GG	TT	GG	GG	GG	TT	GG	TT	TT	GG	GG	GG	GG	TT	TT	TT	GG	GG	GG	TT	GG	TT	TT	GG	GG	TT	TT	GG	TT	GG	TT	TT	GG	GG	GG	GG	TT	GG	GG	GG
Gm12_632910_C_T	Gm12	637878	TT	CC	TT	TT	TT	TT	CC	CC	TT	CC	CC	CC	TT	CC	TT	TT	CC	CC	CC	CC	TT	TT	TT	CC	CC	CC	TT	CC	TT	TT	CC	CC	TT	TT	CC	TT	CC	TT	TT	CC	CC	CC	CC	TT	CC	CC	CC
Gm12_849243_A_G	Gm12	854212	GG	AA	GG	GG	GG	GG	AA	AA	GG	--	AA	AG	GG	AA	GG	GG	AA	GG	AG	AA	GG	GG	GG	AG	AA	AA	GG	AA	GG	GG	AA	AA	GG	GG	AA	GG	AA	GG	GG	AA	AA	AA	--	GG	AA	AA	AA
Gm12_915327_T_C	Gm12	920290	CC	--	CC	CC	CC	CC	TT	TT	CC	TT	TT	TC	CC	TT	CC	CC	TT	CC	TT	TT	CC	CC	CC	TT	TT	TT	CC	TT	CC	CC	TT	TT	CC	CC	TT	CC	TT	CC	CC	TT	TT	TT	TT	CC	TT	TT	TT
Gm12_975837_G_A	Gm12	980800	--	AG	AG	AA	AA	AA	GG	GG	AA	GG	GG	GG	AA	GG	AA	AA	GG	AA	GG	GG	AA	--	AA	GG	GG	GG	AA	GG	--	AA	GG	GG	AA	AA	GG	AA	GG	AA	AA	GG	GG	GG	GG	AG	GG	GG	GG
Gm12_1064727_T_C	Gm12	1069688	TC	TC	TC	TC	TC	TC	TT	TT	TC	TT	TT	--	TC	TT	TC	TC	TT	TC	TT	TT	TC	TC	TC	TT	TT	TT	TC	TT	TC	TC	TT	TT	TC	TC	TT	TC	TT	TC	TC	TT	TT	TT	TT	TC	TT	TT	TT
Gm12_1070930_T_C	Gm12	1075891	CC	--	CC	CC	CC	CC	TT	TT	CC	TT	TT	--	CC	TT	CC	CC	TT	CC	TT	TT	CC	CC	CC	TT	TT	TT	CC	TT	CC	CC	TT	TT	CC	CC	TT	CC	TT	CC	CC	TT	TT	TT	TT	CC	TT	TT	TT
Gm12_1161576_T_C	Gm12	1166537	TC	TC	TC	TC	TC	TC	TT	TT	TC	TT	TT	--	TC	TT	TC	TC	TT	TC	TT	TT	TC	TC	TC	TT	TT	TT	TC	TT	TC	TC	TT	TT	TC	TC	TT	TC	TT	TC	TC	TT	TT	TT	TT	TC	TT	TT	TT
Gm12_1229101_T_C	Gm12	1234005	CC	--	CC	CC	CC	CC	TT	TT	CC	TT	TT	TC	CC	TT	CC	CC	TT	CC	TT	TT	CC	CC	CC	TT	TT	TT	CC	TT	CC	CC	TT	TT	CC	CC	TT	CC	TT	CC	CC	TT	TT	TT	TT	CC	TT	TT	TT
Gm12_1374970_T_C	Gm12	1379873	CC	--	CC	CC	CC	CC	TT	TT	CC	--	TT	--	CC	TT	CC	CC	TT	CC	--	TT	CC	CC	CC	--	TT	TT	CC	TT	CC	CC	TT	TT	CC	CC	TT	CC	TT	CC	CC	TT	TT	TT	--	CC	TT	TT	TT
Gm12_1433336_C_A	Gm12	1438251	AA	AA	AA	AA	AA	AA	AA	AA	AA	AA	AA	AA	AA	AA	AA	AA	AA	AA	AA	AA	AA	AA	AA	AA	AA	AA	AA	AA	AA	AA	AA	AA	AA	AA	AA	AA	AA	AA	AA	AA	AA	AA	AA	AA	AA	AA	AA
Gm12_1632399_G_A	Gm12	1637312	AA	AA	AA	AA	AA	AA	AA	AA	AA	AA	AA	AA	AA	AA	AA	AA	AA	AA	AA	AA	AA	AA	AA	AA	AA	AA	AA	AA	AA	AA	AA	AA	AA	AA	AA	AA	AA	AA	AA	AA	AA	AA	AA	AA	AA	AA	AA
Gm12_1761905_G_T	Gm12	1766819	GG	GG	GG	GG	GG	GG	GG	GG	GG	GG	GG	GG	GG	GG	GG	GG	GG	GG	GG	GG	GG	GG	GG	GG	GG	GG	GG	GG	GG	GG	GG	GG	GG	GG	GG	GG	GG	GG	GG	GG	GG	GG	GG	GG	GG	GG	GG
Gm12_1839277_A_G	Gm12	1844191	AA	AA	AA	AA	AA	AA	AA	AA	AA	AA	AA	AA	AA	AA	AA	AA	AA	AA	AA	AA	AA	AA	AA	AA	AA	AA	AA	AA	AA	AA	AA	AA	AA	AA	AA	AA	AA	AA	AA	AA	AA	AA	AA	AA	AA	AA	AA
Gm12_2049842_G_A	Gm12	2054699	GG	GG	GG	GG	GG	GG	GG	GG	GG	GG	GG	GG	GG	GG	GG	GG	GG	GG	GG	GG	GG	GG	GG	GG	GG	GG	GG	GG	GG	GG	GG	GG	GG	GG	GG	GG	GG	GG	GG	GG	GG	GG	GG	GG	GG	GG	GG
Gm12_2140417_A_G	Gm12	2145273	AA	AA	AA	AA	AA	AA	AA	AA	AA	AA	AA	AA	AA	AA	AA	AA	AA	AA	AA	AA	AA	AA	AA	AA	AA	AA	AA	AA	AA	AA	AA	AA	AA	AA	AA	AA	AA	AA	AA	AA	AA	AA	AA	AA	AA	AA	AA
Gm12_2184391_A_G	Gm12	2189248	AA	AA	AA	AA	AA	AA	AA	AA	AA	AA	AA	AA	AA	AA	AA	AA	AA	AA	AA	AA	AA	AA	AA	AA	AA	AA	AA	AA	AA	AA	AA	AA	AA	AA	AA	AA	AA	AA	AA	AA	AA	AA	AA	AA	AA	AA	AA
Gm12_2379195_C_A	Gm12	2383625	CC	CC	CC	CC	CC	CC	CC	CC	CC	CC	CC	CC	CC	CC	CC	CC	CC	CC	CC	CC	CC	CC	CC	CC	CC	CC	CC	CC	CC	CC	CC	CC	CC	CC	CC	CC	CC	CC	CC	CC	CC	CC	CC	CC	CC	CC	CC
Gm12_2681036_G_A	Gm12	2677409	AG	AA	AA	GG	GG	GG	AA	AA	GG	AA	AA	--	GG	AA	GG	GG	AA	GG	AA	AA	GG	AG	--	AA	AA	AG	AA	AA	AG	GG	AA	AA	GG	GG	AA	GG	AA	AA	GG	AA	AA	AA	AA	AG	AA	AA	AA
Gm12_3843573_G_A	Gm12	3849110	AA	AA	AA	AA	AA	AA	AA	AA	AA	AA	AA	AA	AA	AA	AA	AA	AA	AA	AA	AA	AA	AA	AA	AA	AA	AA	AA	AA	AA	AA	AA	AA	AA	AA	AA	AA	AA	AA	AA	AA	AA	AA	AA	AA	AA	AA	AA
Gm12_4025840_T_G	Gm12	4031021	GG	GG	GG	GG	GG	GG	GG	GG	GG	GG	GG	GG	GG	GG	GG	GG	GG	GG	GG	GG	GG	GG	GG	GG	GG	GG	GG	GG	GG	GG	GG	GG	GG	GG	GG	GG	GG	GG	GG	GG	GG	GG	GG	GG	GG	GG	GG
Gm12_4268262_G_A	Gm12	4268882	AA	AA	AA	AA	AA	AA	AA	AA	AA	AA	AA	AA	AA	AA	AA	AA	AA	AA	AA	AA	AA	AA	AA	AA	AA	AA	AA	AA	AA	AA	AA	AA	AA	AA	AA	AA	AA	AA	AA	AA	AA	AA	AA	AA	AA	AA	AA
Gm12_4363882_T_C	Gm12	4364475	TT	TT	TT	TT	TT	TT	TT	TT	TT	TT	TT	TT	TT	TT	TT	TT	TT	TT	TT	TT	TT	TT	TT	TT	TT	TT	TT	TT	TT	TT	TT	TT	TT	TT	TT	TT	TT	TT	TT	TT	TT	TT	TT	TT	TT	TT	TT
Gm12_4829922_C_T	Gm12	4830371	--	TC	CC	CC	CC	CC	CC	CC	CC	CC	CC	--	TT	CC	CC	--	CC	--	CC	CC	TT	TT	--	CC	CC	CC	CC	CC	TC	TT	--	CC	CC	TT	CC	TT	CC	TT	CC	CC	TT	CC	CC	CC	CC	CC	--
Gm12_6023395_T_C	Gm12	6052289	CC	CC	CC	CC	CC	CC	CC	CC	CC	CC	CC	CC	CC	CC	CC	CC	CC	CC	CC	CC	CC	CC	CC	CC	CC	CC	CC	CC	CC	CC	CC	CC	CC	CC	CC	CC	CC	CC	CC	CC	CC	CC	CC	CC	CC	CC	CC
Gm12_6195964_C_T	Gm12	6224858	TT	TT	TT	TT	TT	TT	TT	TT	TT	TT	TT	TT	TT	TT	TT	TT	TT	TT	TT	TT	TT	TT	TT	TT	TT	TT	TT	TT	TT	TT	TT	TT	TT	TT	TT	TT	TT	TT	TT	TT	TT	TT	TT	TC	TT	TT	TT
Gm12_6295017_A_C	Gm12	6324308	CC	CC	CC	CC	CC	CC	CC	CC	CC	CC	CC	CC	CC	CC	CC	CC	CC	CC	CC	CC	CC	CC	CC	CC	CC	CC	CC	CC	CC	CC	CC	CC	CC	CC	CC	CC	CC	CC	CC	CC	CC	CC	CC	--	CC	CC	CC
Gm12_6407458_T_C	Gm12	6436749	TT	TT	CC	CC	CC	CC	CC	CC	CC	TT	CC	CC	--	CC	CC	CC	CC	CC	CC	CC	TT	TT	TC	CC	CC	CC	CC	CC	CC	TT	TT	CC	CC	CC	CC	CC	CC	TT	CC	TT	--	CC	CC	CC	CC	CC	TT
Gm12_6420304_C_T	Gm12	6449595	CC	CC	TT	TT	TT	TT	TT	TT	TT	CC	TT	TT	--	TT	TT	TT	TT	TT	TT	TT	CC	CC	TC	TT	TT	TT	TT	TT	TT	CC	CC	TT	TT	TT	TT	TT	TT	CC	TT	CC	--	TT	TT	--	TT	TT	CC
Gm12_6621471_A_G	Gm12	6652775	AA	AA	AA	AA	AA	AA	AA	AA	AA	AA	AA	AA	AA	AA	AA	AA	AA	AA	AA	AA	AA	AA	AA	AA	AA	AA	AA	AA	AA	AA	AA	AA	AA	AA	AA	AA	AA	AA	AA	AA	AA	AA	AA	AA	AA	AA	AA
Gm12_6663270_C_T	Gm12	6694566	CC	CC	CC	CC	CC	CC	CC	CC	CC	CC	CC	CC	CC	CC	CC	CC	CC	CC	CC	CC	CC	CC	CC	CC	CC	CC	CC	CC	CC	CC	CC	CC	CC	CC	CC	CC	CC	CC	CC	CC	CC	CC	CC	CC	CC	CC	CC
Gm12_6892713_T_C	Gm12	6931210	--	--	--	CC	CC	CC	CC	CC	CC	--	CC	TT	CC	CC	CC	CC	CC	CC	CC	CC	--	--	TC	CC	CC	--	CC	--	CC	--	TC	CC	CC	CC	CC	CC	CC	TC	--	--	TC	CC	TC	--	--	CC	--
Gm12_6932978_G_A	Gm12	6971475	GG	GG	--	AA	AA	AA	AA	AA	AA	GG	AA	GG	AA	AA	AA	AA	AA	AA	AA	AA	GG	GG	--	AA	AA	--	AA	GG	AA	GG	GG	AA	AA	AA	AA	AA	AA	GG	--	GG	GG	AA	GG	AG	GG	AA	GG
Gm12_6943211_G_A	Gm12	6981708	GG	--	--	AA	AA	--	AA	AA	AA	--	AA	GG	AA	AA	AA	AA	AA	--	AA	AA	GG	GG	AG	--	AA	--	AA	GG	AA	--	--	AA	AA	AA	AA	AA	AA	--	--	--	--	--	--	--	GG	AA	--
Gm12_7162872_G_A	Gm12	7201537	GG	GG	GG	GG	GG	GG	GG	GG	GG	GG	GG	GG	GG	GG	GG	GG	GG	GG	GG	GG	GG	GG	GG	GG	GG	GG	GG	GG	GG	GG	GG	GG	GG	GG	GG	GG	GG	GG	GG	GG	GG	GG	GG	GG	GG	GG	GG
Gm12_7270512_G_A	Gm12	7309177	GG	GG	GG	GG	GG	GG	GG	GG	GG	GG	GG	GG	GG	GG	GG	GG	GG	GG	GG	GG	GG	GG	GG	GG	GG	GG	GG	GG	GG	GG	GG	GG	GG	GG	GG	GG	GG	GG	GG	GG	GG	GG	GG	GG	GG	GG	GG
Gm12_7316668_A_G	Gm12	7355333	AA	AA	GG	GG	GG	GG	GG	GG	GG	AA	GG	GG	GG	GG	GG	GG	GG	GG	GG	GG	AA	AA	--	GG	AA	GG	GG	AA	GG	AA	AA	GG	GG	GG	GG	GG	GG	AA	GG	AA	AA	GG	AA	GG	AA	GG	AA
Gm12_7584843_C_T	Gm12	7623089	TT	TT	TT	TT	TT	TT	TT	TT	TT	TT	TT	TT	TT	TT	TT	TT	TT	TT	TT	TT	TT	TT	TT	TT	TT	TT	TT	TT	TT	TT	TT	TT	TT	TT	TT	TT	TT	TT	TT	TT	TT	TT	TT	TT	TT	TT	TT
Gm12_7855367_G_A	Gm12	7893592	AA	AA	AA	AA	AA	AA	AA	AA	AA	AA	AA	AA	AA	AA	AA	AA	AA	AA	AA	AA	AA	AA	AA	AA	AA	AA	AA	AA	AA	AA	AA	AA	AA	AA	AA	AA	AA	AA	AA	AA	AA	AA	AA	AA	AA	AA	AA
Gm12_7949328_T_C	Gm12	7987575	CC	CC	CC	CC	CC	CC	CC	CC	CC	CC	CC	CC	CC	CC	CC	CC	CC	CC	CC	CC	CC	CC	CC	CC	CC	CC	CC	CC	CC	CC	CC	CC	CC	CC	CC	CC	CC	CC	CC	CC	CC	CC	CC	CC	CC	CC	CC
Gm12_8075838_G_A	Gm12	8113476	AA	AA	AA	AA	AA	AA	AA	AA	AA	AA	AA	AA	AA	AA	AA	AA	AA	AA	AA	AA	AA	AA	AA	AA	AA	AA	AA	AA	AA	AA	AA	AA	AA	AA	AA	AA	AA	AA	AA	AA	AA	AA	AA	AA	AA	AA	AA
Gm12_8435100_T_C	Gm12	8468710	CC	CC	CC	CC	CC	CC	CC	CC	CC	CC	CC	CC	CC	CC	CC	CC	CC	CC	CC	CC	CC	CC	CC	CC	CC	CC	CC	CC	CC	CC	CC	CC	CC	CC	CC	CC	CC	CC	CC	CC	CC	CC	CC	CC	CC	CC	CC
Gm12_8469462_T_C	Gm12	8505012	CC	CC	CC	CC	CC	CC	CC	CC	CC	CC	CC	CC	CC	CC	CC	CC	CC	CC	CC	CC	CC	CC	CC	CC	CC	CC	CC	CC	CC	CC	CC	CC	CC	CC	CC	CC	CC	CC	CC	CC	CC	CC	CC	CC	CC	CC	CC
Gm12_9114648_G_T	Gm12	9149774	TG	--	TT	GG	TT	TT	GG	TT	GG	TT	GG	GG	TT	GG	TT	TG	TT	TT	GG	TT	TT	TT	--	TG	GG	TT	TT	GG	--	TT	--	TT	TT	TT	TT	TT	TT	TG	GG	TT	TG	TT	TT	--	TT	TT	TT
Gm12_9153986_G_A	Gm12	9189112	AA	AG	AA	GG	AA	AA	GG	AA	GG	AA	GG	GG	AA	GG	AA	AA	AA	AA	GG	AA	AA	AA	GG	AA	GG	AA	AA	GG	AA	AA	AA	AA	AA	AA	AA	AA	AA	AA	GG	AA	AA	AA	AA	GG	AA	AA	AA
Gm12_9174400_A_G	Gm12	9209526	GG	--	GG	AA	GG	GG	AA	GG	AA	GG	AA	--	GG	AA	GG	GG	GG	GG	AA	GG	GG	GG	AG	GG	AA	GG	GG	AA	GG	GG	GG	GG	GG	GG	GG	GG	GG	GG	--	GG	GG	GG	GG	AG	GG	GG	GG
Gm12_9193994_C_T	Gm12	9229120	--	--	TT	CC	TT	TT	CC	TT	CC	TT	CC	--	TT	CC	TT	TT	TT	TT	CC	TT	TT	TT	TC	TT	CC	TT	TT	CC	TT	TT	TT	TT	TT	TT	TT	TT	TT	TT	--	TT	--	TT	TT	TC	TT	TT	TT
Gm12_9770096_T_C	Gm12	9804254	--	--	CC	TT	CC	CC	TT	CC	TT	CC	--	--	CC	TT	CC	CC	CC	CC	--	CC	CC	CC	TC	CC	TT	CC	CC	TT	CC	CC	CC	CC	CC	CC	CC	CC	CC	CC	TC	CC	CC	CC	CC	TC	CC	CC	CC
Gm12_9840192_G_A	Gm12	9883350	AG	--	AA	GG	AA	AA	GG	AA	GG	AA	GG	GG	AA	GG	AA	AG	AA	AA	GG	AA	AA	--	--	--	GG	--	AA	GG	AA	AA	AA	AA	AA	AA	AA	AA	AA	AG	GG	AA	AA	AA	AA	--	AA	AA	AA
Gm12_9929827_C_T	Gm12	9972984	--	TT	TT	CC	TT	TT	CC	TT	CC	TT	CC	--	TT	CC	TT	--	TT	TT	CC	TT	TT	TT	TC	TT	CC	TT	TT	CC	TT	TT	TT	TT	TT	TT	TT	TT	TT	TT	TC	TT	TT	TT	TT	TC	TT	TT	TT
Gm12_10015000_T_C	Gm12	10072931	CC	CC	CC	TT	CC	CC	TT	CC	TT	CC	TT	TC	CC	TT	CC	CC	CC	CC	--	CC	CC	CC	TC	CC	TT	CC	CC	TT	CC	CC	CC	CC	CC	CC	CC	CC	CC	CC	TC	CC	CC	CC	CC	TC	CC	CC	CC
Gm12_10933346_T_G	Gm12	11006736	TG	GG	GG	TT	GG	GG	TT	GG	TT	GG	TT	--	GG	TT	GG	TG	GG	GG	TT	GG	GG	GG	--	TG	TT	TG	GG	TT	GG	GG	GG	GG	GG	GG	GG	GG	GG	TG	TT	GG	GG	GG	GG	--	GG	GG	GG
Gm12_10990594_C_T	Gm12	11063984	--	TT	TT	--	TT	TT	CC	TT	CC	TT	TC	--	TT	CC	TT	--	TT	TT	TC	TT	TT	TT	--	TT	CC	TT	TT	CC	TT	TT	TT	TT	TT	TT	TT	TT	TT	TT	TC	TT	TT	TT	TT	TC	TT	TT	TT
Gm12_11045583_T_C	Gm12	11119667	--	CC	CC	TC	CC	CC	TT	CC	TT	CC	TC	--	CC	TT	CC	--	CC	CC	TC	CC	CC	CC	TC	CC	TT	CC	CC	TT	CC	CC	CC	CC	CC	CC	CC	CC	CC	CC	TC	CC	CC	CC	CC	TC	CC	CC	CC
Gm12_11083164_G_A	Gm12	11157215	AA	AA	AA	GG	AA	AA	GG	AA	GG	AA	GG	--	AA	GG	AA	AA	AA	AA	GG	AA	AA	AA	GG	AA	GG	AG	AA	GG	AA	AA	AA	AA	AA	AA	AA	AA	AA	AA	GG	AA	AA	AA	AA	GG	AA	AA	AA
Gm12_11177435_T_C	Gm12	11252007	--	CC	CC	TT	CC	CC	TT	CC	TT	CC	TT	--	CC	TT	CC	CC	CC	CC	TT	CC	CC	CC	TC	CC	TT	--	CC	TT	CC	CC	CC	CC	CC	CC	CC	CC	CC	CC	--	CC	CC	CC	CC	TC	CC	CC	CC
Gm12_11276724_A_G	Gm12	11351830	--	GG	GG	AA	GG	GG	AA	GG	AA	GG	AA	--	GG	AA	GG	GG	GG	GG	AA	GG	GG	GG	AG	GG	AA	--	GG	AA	GG	GG	GG	GG	GG	GG	GG	GG	GG	GG	--	GG	GG	GG	GG	AG	GG	GG	GG
Gm12_11325625_T_C	Gm12	11400705	CC	CC	CC	TT	CC	CC	TT	CC	TT	CC	TT	--	CC	TT	CC	CC	CC	CC	TT	CC	CC	CC	TC	CC	TT	--	CC	TT	CC	CC	CC	CC	CC	CC	CC	CC	CC	CC	--	CC	CC	CC	CC	TC	CC	CC	CC
Gm12_11373315_G_T	Gm12	11448388	TG	TT	TT	GG	TT	TT	GG	TT	GG	TT	GG	GG	TT	GG	TT	TG	TT	TT	GG	TT	TT	TT	--	--	GG	--	TT	GG	TT	TT	TT	TT	TT	TT	TT	TT	TT	TG	GG	TT	TT	TT	TT	--	TT	TT	TT
Gm12_12224641_G_A	Gm12	12295387	--	AA	AA	AA	AA	AA	GG	AA	GG	AA	GG	--	AA	GG	AA	AA	AA	AA	GG	AA	AA	AA	AG	AA	GG	--	AA	GG	AA	AA	AA	AA	AA	AA	AA	AA	AA	AA	--	AA	AA	AA	AA	--	AA	AA	AA
Gm12_12635492_A_G	Gm12	12706240	--	GG	GG	GG	GG	GG	AA	GG	AA	GG	AA	--	GG	AA	GG	GG	GG	GG	AA	GG	GG	GG	--	GG	AA	AG	GG	AA	GG	GG	GG	GG	GG	GG	GG	GG	GG	GG	AA	GG	GG	GG	GG	--	GG	GG	GG
Gm12_12686063_T_C	Gm12	12756876	--	CC	CC	CC	CC	CC	TT	CC	TT	CC	--	--	CC	TT	CC	CC	CC	CC	--	CC	CC	CC	TC	CC	TT	--	CC	TT	CC	CC	CC	CC	CC	CC	CC	CC	CC	CC	TC	CC	CC	CC	CC	--	CC	CC	CC
Gm12_13354287_T_C	Gm12	13421597	--	CC	CC	CC	CC	CC	TT	CC	TT	--	--	--	CC	TT	CC	CC	CC	CC	--	CC	CC	CC	TC	CC	TT	--	CC	TT	CC	CC	CC	CC	CC	CC	CC	CC	CC	CC	TC	CC	CC	CC	CC	--	CC	CC	CC
Gm12_14309506_T_C	Gm12	14384675	--	CC	CC	CC	CC	CC	TT	CC	CC	--	--	--	CC	TT	CC	--	CC	CC	--	CC	CC	CC	TC	CC	TT	--	CC	TT	CC	CC	CC	CC	CC	CC	CC	CC	CC	CC	TC	CC	CC	CC	CC	--	CC	CC	CC
Gm12_14736851_A_G	Gm12	14824668	GG	GG	GG	GG	GG	GG	AA	GG	GG	--	AA	AA	GG	AA	GG	GG	GG	GG	AA	GG	GG	GG	AG	GG	AA	--	GG	AA	GG	GG	GG	GG	GG	GG	GG	GG	GG	GG	--	GG	GG	GG	GG	GG	GG	GG	GG
Gm12_24271835_G_A	Gm12	20474981	--	GG	GG	GG	GG	GG	AA	GG	AA	--	AA	--	GG	AA	GG	--	GG	GG	--	GG	GG	GG	AG	GG	AA	--	GG	GG	GG	GG	GG	GG	GG	GG	GG	GG	GG	GG	--	GG	GG	GG	GG	--	GG	GG	GG
Gm12_24320821_T_C	Gm12	20523955	TT	TT	--	TT	TT	TT	CC	TT	CC	TC	CC	--	TT	CC	TT	--	TT	TT	CC	TT	TT	TT	--	TT	CC	TC	TT	TT	TT	TT	TT	TT	TT	TT	TT	TT	TT	TT	CC	TT	TT	TT	TT	--	TT	TT	TT
Gm12_25839577_G_A	Gm12	22040646	GG	GG	GG	GG	GG	GG	AG	GG	AG	--	AG	AA	GG	AG	GG	GG	GG	GG	AG	GG	GG	GG	AG	GG	AG	--	GG	GG	GG	GG	GG	GG	GG	GG	GG	GG	GG	GG	AG	GG	GG	GG	GG	--	GG	GG	GG
Gm12_19958851_A_G	Gm12	28136735	AA	AA	AA	AA	AA	AA	GG	AA	GG	AG	GG	GG	AA	GG	AA	AA	AA	AA	GG	AA	AA	AA	--	AA	GG	AG	AA	AA	AA	AA	AA	AA	AA	AA	AA	AA	AA	AA	GG	AA	AA	AA	AA	--	AA	AA	AA
Gm12_32389331_A_C	Gm12	32347348	CC	CC	CC	CC	CC	CC	AA	CC	AA	AC	AA	AA	CC	AA	CC	CC	CC	CC	AA	CC	CC	CC	AA	AA	AA	AC	CC	CC	CC	CC	CC	AA	CC	CC	AA	CC	CC	CC	AA	AA	CC	AA	CC	CC	CC	CC	CC
Gm12_32537979_A_G	Gm12	32495160	GG	GG	GG	GG	GG	GG	GG	GG	GG	GG	GG	GG	GG	GG	GG	GG	GG	GG	GG	GG	GG	GG	GG	GG	GG	GG	GG	GG	GG	GG	GG	GG	GG	GG	GG	GG	GG	GG	GG	GG	GG	GG	GG	GG	GG	GG	GG
Gm12_32582310_T_G	Gm12	32539490	TG	TT	TG	TT	TT	TT	GG	TT	GG	--	GG	GG	TT	GG	GG	TG	TT	TT	GG	GG	TT	TT	GG	GG	GG	--	TT	TT	TT	TT	TT	GG	TT	TT	GG	TT	TT	TT	GG	GG	TT	GG	TT	TT	TT	TT	TT
Gm12_32734395_T_C	Gm12	32690982	CC	CC	CC	CC	CC	CC	CC	CC	CC	CC	CC	CC	CC	CC	CC	CC	CC	CC	CC	CC	CC	CC	CC	CC	CC	CC	CC	CC	CC	CC	CC	CC	CC	CC	CC	CC	CC	CC	CC	CC	CC	CC	CC	CC	CC	CC	CC
Gm12_32771353_A_G	Gm12	32727465	GG	GG	GG	GG	GG	GG	GG	GG	GG	GG	GG	GG	GG	GG	GG	GG	GG	GG	GG	GG	GG	GG	GG	GG	GG	GG	GG	GG	GG	GG	GG	GG	GG	GG	GG	GG	GG	GG	GG	GG	GG	GG	GG	GG	GG	GG	GG
Gm12_33110081_G_T	Gm12	33067511	GG	GG	GG	GG	GG	GG	GG	GG	GG	GG	GG	GG	GG	GG	GG	GG	GG	GG	GG	GG	GG	GG	GG	GG	GG	GG	GG	GG	GG	GG	GG	GG	GG	GG	GG	GG	GG	GG	GG	GG	GG	GG	GG	GG	GG	GG	GG
Gm12_33258930_A_C	Gm12	33216359	CC	CC	CC	CC	CC	CC	CC	CC	CC	CC	CC	CC	CC	CC	CC	CC	CC	CC	CC	CC	CC	CC	CC	CC	CC	CC	CC	CC	CC	CC	CC	CC	CC	CC	CC	CC	CC	CC	CC	CC	CC	CC	CC	CC	CC	CC	CC
Gm12_33536846_T_G	Gm12	33493819	TT	TT	TT	TT	TT	TT	GG	TT	TT	--	GG	TT	TT	GG	TT	TT	TT	TT	TG	TT	TT	TT	TT	TT	GG	TT	TT	TT	TT	TT	TT	TT	TT	TT	TT	TT	TT	TT	TG	GG	TT	GG	TT	TT	TT	TT	TT
Gm12_33680937_A_G	Gm12	33637803	GG	GG	GG	GG	GG	GG	GG	GG	GG	GG	GG	GG	GG	GG	GG	GG	GG	GG	GG	GG	GG	GG	GG	GG	GG	GG	GG	GG	GG	GG	GG	GG	GG	GG	GG	GG	GG	GG	GG	GG	GG	GG	GG	AG	GG	GG	GG
Gm12_33815566_A_G	Gm12	33776738	AA	AA	AA	AA	AA	AA	GG	AA	AA	--	GG	AA	AA	GG	AA	AA	AA	AA	GG	AA	AA	AA	AA	AA	GG	AA	AA	AA	AA	AA	AA	AA	AA	AA	AA	AA	AA	AA	GG	GG	AA	GG	AA	AA	AA	AA	AA
Gm12_33892140_G_A	Gm12	33853312	AA	AA	--	AA	AA	AG	GG	AA	GG	AG	GG	AG	AA	GG	GG	--	AA	AA	GG	GG	AA	AA	AG	GG	GG	GG	AA	AA	AA	AA	AA	GG	AA	GG	GG	AA	AA	AA	--	GG	AA	GG	AA	AA	AA	AA	AA
Gm12_34217043_C_T	Gm12	34178221	TT	TT	TT	TT	TT	TT	TT	TT	TT	--	TC	TT	TT	CC	TT	TT	TT	TT	CC	TT	TT	TT	TT	TT	CC	TT	TT	TT	TT	TT	TT	TT	TT	TT	TT	TT	TT	TT	CC	CC	TT	CC	TT	TT	TT	TT	TT
Gm12_34380492_G_A	Gm12	34341718	AA	AA	--	AA	AA	--	AA	AA	--	--	AG	AA	AA	GG	AA	--	AA	AA	--	AA	AA	AA	--	AA	GG	AA	AA	AA	AA	AA	AA	AA	AA	AA	AA	AA	AA	AA	--	GG	AA	GG	AA	AA	AA	AA	AA
Gm12_34661871_A_C	Gm12	34623277	AA	AA	AA	AA	AA	AA	AA	AA	AA	AC	CC	AA	AA	CC	AA	AA	AA	AA	CC	AA	AA	AA	CC	AA	CC	AA	AA	AA	AA	AA	AA	AA	AA	AA	AA	AA	AA	AA	CC	CC	AA	CC	AA	AA	AA	AA	AA
Gm12_35111865_A_G	Gm12	35086789	GG	GG	GG	GG	GG	AG	GG	GG	AA	GG	GG	AG	GG	GG	AA	GG	AG	GG	GG	AA	GG	GG	GG	AA	GG	AA	GG	GG	GG	GG	GG	AA	GG	AA	AA	GG	GG	GG	GG	GG	GG	GG	GG	--	GG	GG	GG
Gm12_35192993_C_T	Gm12	35167918	TT	TT	TT	TT	TT	TC	TT	TT	CC	TT	TT	TC	TT	TT	CC	TT	TC	TT	TT	CC	TT	TT	--	CC	TT	CC	TT	TT	TT	TT	TT	CC	TT	CC	CC	TT	TT	TT	TT	TT	TT	TT	TT	--	TT	TT	TT
Gm12_35586020_G_A	Gm12	35559975	GG	GG	GG	GG	GG	GG	GG	GG	GG	GG	GG	GG	GG	GG	GG	GG	GG	GG	GG	GG	GG	GG	GG	GG	GG	GG	GG	GG	GG	GG	GG	GG	GG	GG	GG	GG	GG	GG	GG	GG	GG	GG	GG	GG	GG	GG	GG
Gm12_35626081_G_A	Gm12	35600329	AA	AA	AA	GG	GG	AG	AA	AA	GG	AA	GG	--	AA	GG	GG	AA	GG	AA	GG	GG	AA	AA	GG	GG	GG	GG	AA	AA	AA	AA	GG	GG	AA	GG	GG	AA	AA	AA	GG	GG	GG	GG	--	AG	AG	AA	AA
Gm12_36002148_G_T	Gm12	35992900	--	TG	TT	GG	GG	GG	TT	TT	GG	TT	GG	--	TT	GG	GG	TG	GG	--	GG	GG	TT	TT	GG	GG	GG	GG	TT	TT	--	TT	TG	GG	TT	GG	TG	TT	TT	--	GG	GG	GG	GG	--	TG	TG	TT	--
Gm12_36496913_T_C	Gm12	36452567	CC	CC	CC	TT	TT	TT	TT	CC	CC	CC	TT	TC	CC	TT	TT	CC	TT	TT	CC	TT	CC	CC	TT	TT	TT	TT	CC	CC	CC	CC	TC	TT	CC	TT	TC	CC	CC	CC	TT	CC	TT	TT	--	CC	TC	CC	CC
Gm12_36510299_T_C	Gm12	36465953	CC	CC	CC	TT	TT	TT	TT	CC	CC	CC	TT	TC	CC	TT	TT	CC	TT	TT	CC	TT	CC	CC	TT	TT	TT	TT	CC	CC	CC	CC	TC	TT	CC	TT	TC	CC	CC	CC	TT	CC	TT	TT	TC	--	TC	CC	CC
Gm12_36700187_G_A	Gm12	36656366	AA	AA	AA	GG	GG	AA	GG	AA	AA	AA	GG	AA	AA	GG	AA	--	AA	GG	AA	AA	AA	AA	GG	AA	GG	AA	AA	AA	AA	AA	AG	AA	AA	AA	AA	AA	AA	AA	GG	AA	AA	GG	--	--	AG	AA	AA
Gm12_36960931_T_C	Gm12	36916909	TT	TT	TT	TT	TT	CC	TT	TT	TT	TT	TT	TC	TT	TT	CC	TT	CC	TT	TT	CC	TT	TT	TT	CC	TT	CC	TT	TT	TT	TT	TT	CC	TT	CC	TC	TT	TT	TT	TT	TT	CC	TT	TT	TT	TT	TT	TT
Gm12_37036017_C_A	Gm12	36991996	AA	AA	AA	AC	AC	AA	--	AA	AA	AA	AC	AA	AA	AC	AA	AA	AA	AC	AA	AA	AA	AA	AC	AA	AC	AA	AA	AA	AA	AA	--	AA	AA	AA	AA	AA	AA	AA	AC	AA	AA	AC	--	AA	--	AA	AA
Gm12_37075152_C_T	Gm12	37031186	TT	TT	TT	CC	CC	TT	CC	TT	TT	TT	CC	TT	TT	CC	TT	TT	TT	CC	TT	TT	TT	TT	CC	TT	CC	TT	TT	TT	TT	TT	TC	TT	TT	TT	TT	TT	TT	TT	CC	TT	TT	CC	TC	--	TC	TT	TT
Gm12_37136269_C_T	Gm12	37092076	TT	TT	TT	CC	CC	TT	CC	TT	--	TT	CC	TT	TT	CC	TT	--	TT	--	TT	TT	TT	TT	--	TT	CC	TT	TT	TT	TT	TT	TC	TT	TT	TT	TT	TT	TT	--	--	TT	TT	--	TC	TC	TC	TT	TT
Gm12_37315664_A_G	Gm12	37271684	AA	AA	AA	AA	AA	AA	AA	AA	AA	AA	AA	AA	AA	AA	AA	AA	AA	AA	AA	AA	AA	AA	AA	AA	AA	AA	AA	AA	AA	AA	AA	AA	AA	AA	AA	AA	AA	AA	AA	AA	AA	AA	AA	AA	AA	AA	AA
Gm12_37702572_C_A	Gm12	37673640	CC	AA	AA	CC	CC	AA	CC	AA	AA	CC	CC	AA	AA	AA	AA	AA	AA	CC	AA	AA	AA	AA	AC	AA	CC	AA	AA	AA	AA	AA	CC	AA	AA	AA	AA	AA	AA	CC	CC	AA	AA	CC	CC	AA	CC	AA	CC
Gm12_37761495_G_T	Gm12	37732563	GG	GG	GG	GG	GG	GG	GG	GG	GG	GG	GG	GG	GG	GG	GG	GG	GG	GG	GG	GG	GG	GG	GG	GG	GG	GG	GG	GG	GG	GG	GG	GG	GG	GG	GG	GG	GG	GG	GG	GG	GG	GG	GG	GG	GG	GG	GG
Gm12_37971963_G_A	Gm12	37942902	GG	AA	--	GG	GG	AA	GG	AA	AA	GG	GG	AA	AA	AA	AA	AA	AA	GG	AA	AA	AA	AA	--	AA	GG	AA	AA	AA	AA	AA	GG	AA	AA	AA	AA	AA	AA	GG	GG	AA	AA	GG	GG	--	GG	AA	GG
Gm12_38053931_C_T	Gm12	38033264	CC	TT	--	CC	CC	TT	CC	TT	TT	CC	CC	TT	TT	TT	TT	--	TT	CC	TT	TT	TT	TT	--	TT	CC	TT	TT	TT	TT	TT	CC	TT	TT	TT	TT	TT	TT	CC	--	TT	TT	CC	CC	TC	CC	TT	CC
Gm12_38183927_C_T	Gm12	38161783	CC	TT	--	CC	CC	TT	CC	TT	TT	CC	CC	TT	TT	TT	TT	--	TT	CC	TT	TT	TT	TT	--	TT	CC	TT	TT	TT	TT	CC	CC	TT	TT	TT	TT	TT	TT	CC	CC	TT	TT	CC	CC	TC	CC	TT	CC
Gm12_38202617_T_C	Gm12	38180473	TT	CC	CC	TT	TT	CC	TT	CC	CC	TT	TT	CC	CC	CC	CC	CC	CC	TT	CC	CC	CC	CC	--	CC	TT	CC	CC	CC	CC	TT	TT	CC	CC	CC	CC	CC	CC	TT	TT	CC	CC	TT	TT	CC	TT	CC	TT
Gm12_38338813_T_C	Gm12	38314956	TT	TT	TT	TT	TT	TT	TT	TT	TT	TT	TT	TT	TT	TT	TT	TT	TT	TT	TT	TT	TT	TT	--	TT	TT	TT	TT	TT	TT	TT	TT	TT	TT	TT	TT	TT	TT	TT	TT	TT	TT	TT	TT	TC	TT	TT	TT
Gm13_12045535_T_C	Gm13	324571	--	TC	CC	CC	CC	CC	CC	--	CC	CC	CC	CC	TT	CC	CC	CC	CC	CC	CC	CC	CC	TT	CC	--	TT	CC	CC	CC	TT	CC	CC	CC	CC	CC	TT	CC	TT	CC	CC	TT	CC	CC	CC	CC	CC	TT	CC
Gm13_12158356_T_G	Gm13	437287	GG	GG	GG	GG	GG	GG	GG	GG	GG	GG	GG	GG	GG	GG	GG	GG	GG	GG	GG	GG	GG	GG	GG	GG	GG	GG	GG	GG	GG	GG	GG	GG	GG	GG	GG	GG	GG	GG	GG	GG	GG	GG	GG	GG	GG	GG	GG
Gm13_12461649_G_A	Gm13	740564	AA	AA	AA	AA	AA	AA	AA	AA	AA	AA	AA	AA	AA	AA	AA	AA	AA	AA	AA	AA	AA	AA	AA	AA	AA	AA	AA	AA	AA	AA	AA	AA	AA	AA	AA	AA	AA	AA	AA	AA	AA	AA	AA	AA	AA	AA	AA
Gm13_13049201_G_T	Gm13	1322421	GG	GG	GG	GG	GG	GG	GG	--	GG	GG	GG	GG	--	GG	GG	GG	GG	GG	GG	GG	GG	--	GG	GG	--	GG	GG	GG	--	GG	GG	GG	GG	GG	--	GG	--	GG	GG	--	GG	GG	GG	GG	GG	--	GG
Gm13_13159950_C_A	Gm13	1438856	AA	AA	AA	AA	AA	AA	AA	AA	AA	AA	AA	AA	AA	AA	AA	AA	AA	AA	AA	AA	AA	AA	AA	AA	AA	AA	AA	AA	AA	AA	AA	AA	AA	AA	AA	AA	AA	AA	AA	AA	AA	AA	AA	AA	AA	AA	AA
Gm13_13613605_C_T	Gm13	1900612	--	--	TT	TT	TT	TT	TT	CC	TT	TT	TT	TT	CC	TT	TT	TT	TT	TT	TT	TT	TT	CC	--	CC	CC	TT	TT	TT	CC	TT	TT	TT	TT	TT	CC	TT	CC	TT	TT	CC	TT	TT	TT	TT	TT	CC	TT
Gm13_13756682_A_G	Gm13	2055850	GG	GG	GG	GG	GG	GG	GG	GG	GG	GG	GG	GG	GG	GG	GG	GG	GG	GG	GG	GG	GG	GG	GG	GG	GG	GG	GG	GG	GG	GG	GG	GG	GG	GG	GG	GG	GG	GG	GG	GG	GG	GG	GG	GG	GG	GG	GG
Gm13_13892231_T_C	Gm13	2191814	TT	TT	TT	TT	TT	TT	TT	TT	TT	TT	TT	TT	TT	TT	TT	TT	TT	TT	TT	TT	TT	TT	TT	TT	TT	TT	TT	TT	TT	TT	TT	TT	TT	TT	TT	TT	TT	TT	TT	TT	TT	TT	TT	TT	TT	TT	TT
Gm13_14588417_G_A	Gm13	2878578	--	GG	AA	AA	AA	AA	AA	GG	AA	AA	AA	AA	GG	AA	AA	AA	AA	AA	AA	AA	AA	GG	AA	GG	GG	AA	AA	AA	GG	AA	AA	AA	AA	AA	GG	AA	GG	AA	AA	GG	AA	AA	AA	AA	AA	GG	AA
Gm13_15583636_A_G	Gm13	4157086	GG	GG	GG	GG	GG	GG	GG	GG	GG	GG	GG	GG	GG	GG	GG	GG	GG	GG	GG	GG	GG	GG	GG	GG	GG	GG	GG	GG	GG	GG	GG	GG	GG	GG	GG	GG	GG	GG	GG	GG	GG	GG	GG	GG	GG	GG	GG
Gm13_16721293_A_G	Gm13	5255911	GG	GG	GG	GG	GG	GG	GG	GG	GG	GG	GG	GG	GG	GG	GG	GG	GG	GG	GG	GG	GG	GG	GG	GG	GG	GG	GG	GG	GG	GG	GG	GG	GG	GG	GG	GG	GG	GG	GG	GG	GG	GG	GG	GG	GG	GG	GG
Gm13_17191857_G_A	Gm13	5724230	AA	AA	AA	AA	AA	AA	AA	AA	AA	AA	AA	AA	AA	AA	AA	AA	AA	AA	AA	AA	AA	AA	AA	AA	AA	AA	AA	AA	AA	AA	AA	AA	AA	AA	AA	AA	AA	AA	AA	AA	AA	AA	AA	AA	AA	AA	AA
Gm13_17652991_A_G	Gm13	6185319	GG	GG	GG	GG	GG	GG	GG	GG	GG	GG	GG	GG	GG	GG	GG	GG	GG	GG	GG	GG	GG	GG	GG	GG	GG	GG	GG	GG	GG	GG	GG	GG	GG	GG	GG	GG	GG	GG	GG	GG	GG	GG	GG	GG	GG	GG	GG
Gm13_19452973_G_A	Gm13	7353724	AA	AA	AA	AA	AA	AA	AA	AA	AA	AA	AA	AA	AA	AA	AA	AA	AA	AA	AA	AA	AA	AA	AA	AA	AA	AA	AA	AA	AA	AA	AA	AA	AA	AA	AA	AA	AA	AA	AA	AA	AA	AA	AA	AA	AA	AA	AA
Gm13_19040172_G_A	Gm13	7767773	--	GG	AA	AA	AA	AA	AA	GG	AA	AA	AA	AA	GG	AA	AA	AA	AA	AA	AA	AA	AA	GG	--	GG	GG	AA	AA	AA	GG	AA	AA	AA	AA	AA	GG	AA	GG	AA	AA	GG	AA	AA	AA	AA	AA	GG	AA
Gm02_27295513_G_A	Gm13	10071637	AA	AA	AA	AA	AA	AA	AA	AA	AA	AA	AA	AA	AA	AA	AA	AA	AA	AA	AA	AA	AA	AA	AA	AA	AA	AA	AA	AA	AA	AA	AA	AA	AA	AA	AA	AA	AA	AA	AA	AA	AA	AA	AA	AA	AA	AA	AA
Gm13_11463853_T_C	Gm13	10423581	--	CC	CC	CC	CC	CC	CC	TT	CC	CC	CC	CC	TT	CC	CC	CC	CC	CC	CC	CC	CC	TT	CC	TT	TT	CC	CC	CC	TT	CC	CC	CC	CC	CC	TT	CC	TT	CC	CC	TT	CC	CC	CC	CC	CC	TT	CC
Gm13_10759545_A_C	Gm13	11130398	CC	CC	CC	CC	CC	CC	CC	CC	CC	CC	CC	CC	CC	CC	CC	CC	CC	CC	CC	CC	CC	CC	CC	CC	CC	CC	CC	CC	CC	CC	CC	CC	CC	CC	CC	CC	CC	CC	CC	CC	CC	CC	CC	CC	CC	CC	CC
Gm13_10630165_T_C	Gm13	11259402	--	CC	CC	CC	CC	CC	CC	TT	CC	CC	CC	CC	TT	CC	CC	CC	CC	CC	CC	CC	CC	CC	CC	TT	TT	CC	CC	CC	TT	CC	CC	CC	CC	CC	TT	CC	TT	CC	CC	TT	CC	CC	CC	CC	CC	TT	CC
Gm13_10330320_T_G	Gm13	11559403	GG	GG	GG	GG	GG	GG	GG	GG	GG	GG	GG	GG	GG	GG	GG	GG	GG	GG	GG	GG	GG	GG	GG	GG	GG	GG	GG	GG	GG	GG	GG	GG	GG	GG	GG	GG	GG	GG	GG	GG	GG	GG	GG	GG	GG	GG	GG
Gm13_9993080_C_T	Gm13	11887842	TT	TT	TT	TT	TT	TT	TT	TT	TT	TT	TT	TT	TT	TT	TT	TT	TT	TT	TT	TT	TT	TT	TT	TT	TT	TT	TT	TT	TT	TT	TT	TT	TT	TT	TT	TT	TT	TT	TT	TT	TT	TT	TT	TT	TT	TT	TT
Gm13_8720423_A_G	Gm13	13136275	AG	AA	AA	AA	AA	AA	AA	GG	AA	AA	AA	AA	GG	AA	AA	AA	AA	AA	AA	AA	AA	AA	AA	GG	GG	AA	AA	AA	GG	AA	AA	AA	AA	AA	GG	AA	GG	AA	AA	GG	AA	AA	AA	AA	AA	GG	AA
Gm13_8529479_G_T	Gm13	13331067	TG	GG	GG	GG	GG	GG	GG	TT	GG	GG	GG	GG	TT	GG	GG	GG	GG	GG	GG	GG	GG	--	GG	TT	TT	GG	GG	GG	TT	GG	GG	GG	GG	GG	TT	GG	TT	GG	GG	TT	GG	GG	GG	GG	GG	TT	GG
Gm13_8308962_C_A	Gm13	13550863	--	CC	CC	CC	CC	CC	CC	AA	CC	CC	CC	CC	AA	CC	CC	CC	CC	CC	CC	CC	CC	CC	CC	--	AA	CC	CC	CC	AA	CC	CC	CC	CC	CC	AA	CC	AA	CC	CC	AA	CC	CC	CC	CC	CC	AA	CC
Gm13_8232824_G_T	Gm13	13626971	--	GG	GG	GG	GG	GG	GG	TT	GG	GG	GG	GG	TT	GG	GG	GG	GG	GG	GG	GG	GG	GG	GG	--	TT	GG	GG	GG	TT	GG	GG	GG	GG	GG	TT	GG	TT	GG	GG	TT	GG	GG	GG	GG	GG	TT	GG
Gm13_8168052_C_T	Gm13	13691537	--	CC	CC	CC	CC	CC	CC	TT	CC	CC	CC	CC	TT	CC	CC	CC	CC	CC	CC	CC	CC	CC	CC	TT	TT	CC	CC	CC	TT	CC	CC	CC	CC	CC	TT	CC	TT	CC	CC	TT	CC	CC	CC	CC	CC	TT	CC
Gm13_7285098_T_C	Gm13	14567149	CC	CC	CC	CC	CC	CC	CC	CC	CC	CC	CC	CC	CC	CC	--	CC	CC	CC	CC	CC	CC	CC	CC	CC	--	CC	CC	CC	CC	CC	CC	CC	CC	CC	CC	CC	CC	CC	CC	CC	CC	CC	--	CC	CC	CC	CC
Gm13_7102873_G_A	Gm13	14748561	AA	AA	AA	AA	AA	AA	AA	AA	AA	AA	AA	AA	AA	AA	AA	AA	AA	AA	AA	AA	AA	AA	AA	AA	AA	AA	AA	AA	AA	AA	AA	AA	AA	AA	AA	AA	AA	AA	AA	AA	AA	AA	AA	AA	AA	AA	AA
Gm13_6811934_T_G	Gm13	15075811	GG	GG	GG	GG	GG	GG	GG	GG	GG	GG	GG	GG	GG	GG	GG	GG	GG	GG	GG	GG	GG	GG	GG	GG	GG	GG	GG	GG	GG	GG	GG	GG	GG	GG	GG	GG	GG	GG	GG	GG	GG	GG	GG	GG	GG	GG	GG
Gm13_6761450_T_G	Gm13	15126101	GG	GG	GG	GG	GG	GG	GG	GG	GG	GG	GG	GG	GG	GG	GG	GG	GG	GG	GG	GG	GG	GG	--	GG	GG	GG	GG	GG	GG	GG	GG	GG	GG	GG	GG	GG	GG	GG	GG	GG	GG	GG	GG	GG	GG	GG	GG
Gm13_6687503_A_C	Gm13	15198737	--	CC	--	CC	CC	--	CC	AA	CC	CC	CC	CC	AA	CC	CC	CC	CC	CC	CC	CC	CC	--	--	AA	AA	CC	CC	CC	AA	CC	CC	CC	CC	CC	AA	CC	AA	CC	CC	AA	CC	CC	CC	--	CC	AA	CC
Gm13_6626930_G_A	Gm13	15259977	AG	AA	AG	AA	AA	AA	AA	GG	AA	AA	AA	AA	GG	AA	AA	AA	AA	AA	AA	AA	AA	AA	AA	GG	GG	AA	AA	AA	GG	AA	AA	AA	AA	AA	GG	AA	GG	AA	AA	GG	AA	AA	AA	AG	AA	GG	AA
Gm13_6509852_C_T	Gm13	15377081	TC	TT	--	TT	TT	TT	TT	CC	TT	TT	TT	TT	CC	TT	TT	TT	TT	TT	TT	TT	TT	TT	TT	CC	CC	TT	TT	TT	CC	TT	TT	TT	TT	TT	CC	TT	CC	TT	TT	CC	TT	TT	TT	--	TT	CC	TT
Gm13_6207590_G_A	Gm13	15624186	AG	AA	AG	AA	AA	AA	AA	GG	AA	AA	AA	AA	GG	AA	AA	AA	AA	AA	AA	AA	AA	AA	AA	GG	GG	AA	AA	AA	GG	AA	AA	AA	AA	AA	GG	AA	GG	AA	AA	GG	AG	AA	AA	--	AA	GG	AA
Gm13_6151892_T_C	Gm13	15679762	TT	TT	TT	TT	TT	TT	TT	TT	TT	TT	TT	TT	TT	TT	TT	TT	TT	TT	TT	TT	TT	TT	TT	TT	TT	TT	TT	TT	TT	TT	TT	TT	TT	TT	TT	TT	TT	TT	TT	TT	TT	TT	TT	TT	TT	TT	TT
Gm13_5993892_T_C	Gm13	15834409	TC	CC	--	CC	CC	CC	CC	TT	CC	CC	CC	CC	TT	CC	CC	CC	TT	CC	CC	CC	CC	CC	CC	TT	TT	CC	CC	CC	TT	CC	CC	CC	CC	CC	TT	CC	TT	CC	CC	TT	TC	CC	CC	TT	CC	TT	CC
Gm13_5872811_G_A	Gm13	15948186	AG	AA	--	--	AA	AG	AA	GG	AA	AA	AA	AA	GG	AA	AA	AA	GG	--	AA	AA	AA	AG	AG	--	GG	AA	AA	AA	GG	AA	AG	AA	AA	AA	GG	AA	GG	AA	AA	GG	AG	--	AA	--	AA	GG	AA
Gm13_5674534_C_T	Gm13	16146461	CC	CC	CC	CC	CC	CC	CC	CC	CC	CC	CC	CC	CC	CC	CC	CC	CC	CC	CC	CC	CC	CC	CC	CC	CC	CC	CC	CC	CC	CC	CC	CC	CC	CC	CC	CC	CC	CC	CC	CC	CC	CC	CC	CC	CC	CC	CC
Gm13_5376431_T_C	Gm13	16455228	CC	CC	CC	CC	CC	CC	CC	CC	CC	CC	CC	CC	CC	CC	CC	CC	CC	CC	CC	CC	CC	CC	CC	CC	CC	CC	CC	CC	CC	CC	CC	CC	CC	CC	CC	CC	CC	CC	CC	CC	CC	CC	CC	--	CC	CC	CC
Gm13_5259517_G_A	Gm13	16572167	GG	GG	GG	GG	GG	GG	GG	GG	GG	GG	GG	GG	GG	GG	GG	GG	GG	GG	GG	GG	GG	GG	GG	GG	GG	GG	GG	GG	GG	GG	GG	GG	GG	GG	GG	GG	GG	GG	GG	GG	GG	GG	GG	GG	GG	GG	GG
Gm13_5211326_T_C	Gm13	16620358	TT	TT	TT	TT	TT	TT	TT	TT	TT	TT	TT	TT	TT	TT	TT	TT	TT	TT	TT	TT	TT	TT	TT	TT	TT	TT	TT	TT	TT	TT	TT	TT	TT	TT	TT	TT	TT	TT	TT	TT	TT	TT	TT	TT	TT	TT	TT
Gm13_5075945_G_A	Gm13	16756004	GG	GG	GG	GG	GG	GG	GG	GG	GG	GG	GG	GG	GG	GG	GG	GG	GG	GG	GG	GG	GG	GG	GG	GG	GG	GG	GG	GG	GG	GG	GG	GG	GG	GG	GG	GG	GG	GG	GG	GG	GG	GG	GG	GG	GG	GG	GG
Gm13_5020064_C_T	Gm13	16811968	TC	TT	--	CC	CC	TC	CC	TT	CC	CC	CC	CC	CC	CC	TT	CC	--	TT	CC	TT	CC	--	CC	TT	CC	TT	--	CC	TT	CC	CC	CC	CC	CC	TT	CC	TT	CC	CC	TT	TC	CC	CC	--	CC	TT	CC
Gm13_4817327_C_T	Gm13	17047053	TC	TT	CC	CC	CC	TC	CC	TT	CC	CC	CC	CC	CC	CC	TT	CC	--	TT	CC	TT	CC	--	TC	CC	CC	TT	--	CC	TT	CC	--	CC	CC	CC	CC	CC	TT	CC	CC	TT	CC	CC	CC	--	CC	TT	CC
Gm13_4739271_T_C	Gm13	17125100	TT	TT	TT	TT	TT	TT	TT	TT	TT	TT	TT	TT	TT	TT	TT	TT	TT	TT	TT	TT	TT	TT	TT	TT	TT	TT	TT	TT	TT	TT	TT	TT	TT	TT	TT	TT	TT	TT	TT	TT	TT	TT	TT	TT	TT	TT	TT
Gm13_3620512_G_A	Gm13	18248678	GG	GG	GG	GG	GG	GG	GG	GG	GG	GG	GG	GG	GG	GG	GG	GG	GG	GG	GG	GG	GG	GG	GG	GG	GG	GG	GG	GG	GG	GG	GG	GG	GG	GG	GG	GG	GG	GG	GG	GG	GG	GG	GG	GG	GG	GG	GG
Gm13_3316463_A_G	Gm13	18552568	AA	AA	AA	AA	AA	AA	AA	AA	AA	AA	AA	AA	AA	AA	AA	AA	AA	AA	AA	AA	AA	AA	AA	AA	AA	AA	AA	AA	AA	AA	AA	AA	AA	AA	AA	AA	AA	AA	AA	AA	AA	AA	AA	AA	AA	AA	AA
Gm13_3010849_A_G	Gm13	18857463	AA	AA	AA	AA	AA	AA	AA	AA	AA	AA	AA	AA	AA	AA	AA	AA	AA	AA	AA	AA	AA	AA	AA	AA	AA	AA	AA	AA	AA	AA	AA	AA	AA	AA	AA	AA	AA	AA	AA	AA	AA	AA	AA	AA	AA	AA	AA
Gm13_2993802_T_C	Gm13	18873313	TT	TT	TT	TT	TT	TT	TT	TT	TT	TT	TT	TT	TT	TT	TT	TT	TT	TT	TT	TT	TT	TT	TT	TT	TT	TT	TT	TT	TT	TT	TT	TT	TT	TT	TT	TT	TT	TT	TT	TT	TT	TT	TT	TT	TT	TT	TT
Gm13_2911344_A_G	Gm13	18955770	AA	AA	AA	AA	AA	AA	AA	AA	AA	AA	AA	AA	AA	AA	AA	AA	AA	AA	AA	AA	AA	AA	AA	AA	AA	AA	AA	AA	AA	AA	AA	AA	AA	AA	AA	AA	AA	AA	AA	AA	AA	AA	AA	AA	AA	AA	AA
Gm13_2833623_T_C	Gm13	19033491	TT	TT	TT	TT	TT	TT	TT	TT	TT	TT	TT	TT	TT	TT	TT	TT	TT	TT	TT	TT	TT	TT	TT	TT	TT	TT	TT	TT	TT	TT	TT	TT	TT	TT	TT	TT	TT	TT	TT	TT	TT	TT	TT	TT	TT	TT	TT
Gm13_2558742_C_T	Gm13	19308479	CC	CC	CC	CC	CC	CC	CC	CC	CC	CC	CC	CC	CC	CC	CC	CC	CC	CC	CC	CC	CC	CC	CC	CC	CC	CC	CC	CC	CC	CC	CC	CC	CC	CC	CC	CC	CC	CC	CC	CC	CC	CC	CC	CC	CC	CC	CC
Gm13_898111_T_G	Gm13	20966554	--	TT	TT	TT	GG	--	TT	--	GG	TT	TT	GG	GG	GG	TT	--	GG	TG	GG	TT	GG	GG	GG	GG	GG	TT	TG	GG	--	GG	TT	GG	GG	GG	GG	GG	TT	TT	TG	TT	GG	GG	TT	TT	TT	TT	TT
Gm13_850370_T_C	Gm13	21014295	TT	TT	TT	TT	CC	CC	TT	TT	CC	TT	TT	CC	CC	CC	TT	CC	CC	TC	CC	TT	CC	CC	CC	CC	CC	TT	TC	CC	CC	CC	TT	CC	CC	CC	CC	CC	TT	TT	--	TT	CC	CC	TT	TT	TT	TT	TT
Gm13_717318_C_T	Gm13	21147361	TC	TT	TT	TT	CC	--	--	TC	--	TT	TT	CC	CC	CC	TT	CC	TT	--	CC	TT	CC	CC	CC	CC	CC	TT	--	CC	CC	CC	TT	CC	CC	CC	CC	CC	TT	TT	TC	TT	CC	CC	TT	TT	TT	TT	TT
Gm13_21773778_A_G	Gm13	23329861	AG	AG	AA	AA	GG	GG	AA	AA	GG	AA	AA	GG	GG	GG	AA	GG	AA	GG	AA	AA	AA	GG	GG	GG	GG	--	GG	AA	GG	GG	AA	GG	GG	GG	GG	GG	AA	AA	--	AA	GG	GG	AA	GG	AA	AA	AA
Gm13_22446130_C_T	Gm13	23931630	--	TC	TT	TT	CC	CC	TT	TT	CC	TT	TT	CC	CC	CC	TT	CC	TT	CC	TT	TT	TT	CC	--	CC	CC	--	CC	TT	CC	CC	--	CC	CC	CC	CC	CC	TT	TT	TC	TT	CC	CC	TT	--	TT	TT	TT
Gm13_23131251_C_T	Gm13	24618809	TC	CC	CC	CC	TT	TT	CC	CC	TT	CC	CC	TT	TT	CC	CC	TT	CC	TT	CC	CC	CC	TT	CC	TT	TT	TC	TT	CC	TT	TT	CC	TT	TT	TT	TT	TT	CC	CC	--	CC	TT	CC	CC	TT	CC	CC	CC
Gm13_23261690_T_C	Gm13	24748152	--	TT	TT	TT	CC	CC	TT	TT	CC	TT	TT	CC	CC	TT	TT	CC	TT	CC	TT	TT	TT	CC	TC	CC	CC	--	CC	TT	CC	CC	TC	CC	CC	CC	CC	CC	TT	TT	TC	TT	CC	TT	--	CC	TT	TT	TT
Gm13_23509779_C_T	Gm13	24996808	--	CC	CC	CC	TT	TC	CC	CC	--	CC	CC	TT	TT	CC	CC	TC	CC	--	CC	CC	CC	--	CC	TT	TT	CC	TT	CC	TC	TT	--	TT	TT	TT	TT	TT	CC	CC	--	CC	TT	CC	CC	TC	CC	CC	CC
Gm13_23686614_T_C	Gm13	25172194	--	TT	TT	TT	CC	CC	TT	TT	CC	--	TT	CC	CC	TT	TT	CC	TT	CC	TT	TT	TT	CC	TC	CC	CC	TT	CC	TT	CC	CC	TC	CC	CC	CC	CC	CC	TT	TT	TC	TT	CC	TT	--	--	TT	TT	TT
Gm13_24708738_A_G	Gm13	26194440	AA	AA	AA	AA	AA	AA	AA	AA	AA	AA	AA	AA	AA	AA	AA	AA	AA	AA	AA	AA	AA	AA	AA	AA	AA	AA	AA	AA	AA	AA	AG	AA	AA	AA	AA	AA	AA	AA	AA	AA	AA	AA	AA	AA	AA	AA	AA
Gm13_24847753_A_C	Gm13	26333455	AA	AC	AA	AA	CC	CC	AA	CC	CC	AA	AA	CC	CC	AA	AA	CC	AA	CC	AA	AA	AA	CC	AA	CC	CC	AA	CC	AA	CC	AA	AA	CC	CC	CC	CC	CC	AA	AA	AA	AA	CC	AA	AA	CC	AA	AA	AA
Gm13_25707705_G_A	Gm13	26893749	AA	AA	AA	AA	AA	AA	AA	AA	AA	AA	AA	AA	AA	AA	AA	AA	AA	AA	AA	AA	AA	AA	AA	AA	AA	AA	AA	AA	AA	AA	AG	AA	AA	AA	AA	AA	AA	AA	AA	AA	AA	AA	AA	AA	AA	AA	AA
Gm13_25925316_C_T	Gm13	27112106	TT	--	TT	TT	CC	TC	TT	--	CC	TT	TT	CC	CC	TT	TT	TC	TT	CC	TT	TT	TT	CC	TT	CC	CC	TT	--	TT	CC	TT	TT	CC	CC	CC	CC	CC	TT	TT	--	TT	CC	TT	TT	--	TT	TT	TT
Gm13_26504428_C_T	Gm13	27700711	--	TT	CC	CC	TT	--	CC	TC	TT	CC	CC	TT	TT	CC	TT	TT	CC	TT	TT	CC	CC	TT	CC	TT	TT	CC	TC	TT	TT	CC	--	TT	TT	TT	TT	TT	CC	CC	TC	CC	CC	CC	CC	--	CC	CC	CC
Gm13_26684102_C_A	Gm13	27877847	AA	CC	AA	AA	CC	CC	AA	--	CC	AA	AA	CC	CC	AA	CC	AC	AA	AC	--	AA	AA	CC	AA	CC	CC	AA	--	CC	--	AA	AA	CC	CC	CC	CC	CC	AA	AA	AA	AA	AA	AA	AA	--	AA	AA	AA
Gm13_26749514_T_C	Gm13	27943258	CC	TT	CC	CC	TT	TT	CC	--	TT	CC	CC	TT	TT	CC	TT	TT	CC	TT	TT	CC	CC	TT	CC	TT	TT	CC	TC	TT	TT	CC	CC	TT	TT	TT	TT	TT	CC	CC	--	CC	CC	CC	CC	TC	CC	CC	CC
Gm13_27013838_A_G	Gm13	28207736	AA	GG	AA	AA	GG	GG	AA	AG	GG	AA	AA	GG	GG	AA	GG	GG	AA	GG	GG	GG	AA	GG	AA	GG	GG	AA	AG	GG	GG	AA	AA	GG	GG	GG	GG	GG	AA	AA	AA	AA	AA	AA	AA	AG	AA	AA	AA
Gm13_27132590_C_T	Gm13	28324765	TC	CC	TT	TT	CC	CC	TT	TC	CC	TT	TT	CC	CC	TT	CC	CC	TT	CC	CC	CC	TT	CC	TC	CC	CC	TT	--	CC	CC	TT	TC	CC	CC	CC	CC	CC	TT	TT	TC	TT	TT	TT	TT	--	TT	TT	TT
Gm13_27257076_C_T	Gm13	28449297	TT	CC	TT	TT	CC	CC	TT	--	CC	TT	TT	CC	CC	TT	CC	CC	TT	CC	CC	CC	TT	CC	TT	CC	CC	TT	TC	CC	CC	TT	TT	CC	CC	CC	CC	CC	TT	TT	--	TT	TT	TT	TT	TC	TT	TT	TT
Gm13_27302662_C_T	Gm13	28496350	TT	CC	TT	TT	CC	CC	TT	--	CC	TT	TT	CC	CC	TT	CC	CC	TT	CC	CC	CC	TT	CC	TT	CC	CC	TT	TC	CC	CC	TT	TT	CC	CC	CC	CC	CC	TT	TT	--	TT	TT	TT	TT	TC	TT	TT	TT
Gm13_27373181_G_A	Gm13	28566713	--	GG	AA	AA	GG	GG	AA	AG	GG	AA	AA	GG	GG	AA	GG	GG	AA	GG	GG	GG	AA	GG	--	GG	GG	AA	AG	GG	GG	AA	--	GG	GG	GG	GG	GG	AA	AA	AG	AA	AA	AA	AA	--	AA	AA	AA
Gm13_27418207_G_A	Gm13	28611737	AG	GG	AA	AA	GG	GG	AA	AG	GG	AA	AA	GG	GG	AA	GG	--	AA	GG	GG	GG	AA	GG	--	GG	GG	AA	--	GG	GG	AA	--	GG	GG	GG	GG	GG	AA	AA	AG	AA	AA	AA	AA	--	AA	AA	AA
Gm13_27485765_T_C	Gm13	28679294	CC	TT	CC	CC	TT	TT	CC	TC	TT	CC	CC	TT	TT	CC	TT	TT	CC	TT	TT	TT	CC	TT	CC	TT	TT	CC	TC	TT	TT	CC	CC	TT	TT	TT	TT	TT	CC	CC	CC	CC	CC	CC	CC	TC	CC	CC	CC
Gm13_27601319_C_T	Gm13	28795604	CC	TT	CC	CC	TT	TC	CC	--	TC	CC	CC	TT	TT	CC	TT	TC	CC	TC	TC	TT	CC	--	CC	--	TT	CC	--	TT	TC	CC	CC	TT	TT	TT	TT	TT	CC	CC	CC	CC	CC	CC	CC	--	CC	CC	CC
Gm13_27659281_A_G	Gm13	28853572	GG	GG	GG	GG	GG	GG	GG	GG	GG	GG	GG	GG	GG	GG	GG	GG	GG	GG	GG	GG	GG	GG	--	GG	GG	GG	GG	GG	GG	GG	GG	GG	GG	GG	GG	GG	GG	GG	GG	GG	GG	GG	GG	GG	GG	GG	GG
Gm13_27665585_A_G	Gm13	28859734	GG	GG	GG	GG	GG	GG	GG	GG	GG	GG	GG	GG	GG	GG	GG	GG	GG	GG	GG	GG	GG	GG	GG	GG	GG	GG	GG	GG	GG	GG	GG	GG	GG	GG	GG	GG	GG	GG	GG	GG	GG	GG	GG	GG	GG	GG	GG
Gm13_27796524_G_T	Gm13	28990627	TT	TT	TT	TT	TT	TT	TT	TT	TT	TT	TT	TT	TT	TT	TT	TT	TT	TT	TT	TT	TT	TT	TT	TT	TT	TT	TT	TT	TT	TT	TT	TT	TT	TT	TT	TT	TT	TT	TT	TT	TT	TT	TT	TT	TT	TT	TT
Gm13_27846120_C_T	Gm13	29040223	CC	TT	CC	CC	TT	TT	CC	TC	TT	CC	CC	TT	TT	CC	TT	TT	CC	TT	TT	TT	CC	TT	CC	TT	TT	CC	TC	TT	TT	CC	CC	TT	TT	TT	TT	TT	CC	CC	CC	CC	CC	CC	CC	TC	CC	CC	CC
Gm13_27935177_A_G	Gm13	29128801	AA	GG	AA	AA	GG	GG	AA	AG	GG	AA	AA	GG	GG	AA	GG	GG	AA	GG	GG	GG	AA	GG	AA	GG	GG	AA	AG	GG	GG	AA	AA	GG	GG	GG	GG	GG	AA	AA	AA	AA	AA	AA	AA	AG	AA	AA	AA
Gm13_27987641_C_T	Gm13	29181004	CC	CC	CC	CC	CC	CC	CC	CC	CC	CC	CC	CC	CC	CC	CC	CC	CC	CC	CC	CC	CC	CC	CC	CC	CC	CC	CC	CC	CC	CC	CC	CC	CC	CC	CC	CC	CC	CC	CC	CC	CC	CC	CC	CC	CC	CC	CC
Gm13_28141969_T_G	Gm13	29335356	GG	TT	GG	GG	TT	TT	GG	--	TT	GG	GG	TT	TT	GG	TT	TT	GG	TT	TT	TT	GG	TT	GG	TT	TT	GG	TG	TT	TT	GG	GG	TT	TT	TT	TT	TT	GG	GG	--	GG	GG	GG	GG	TG	GG	GG	GG
Gm13_28252435_A_G	Gm13	29445805	GG	AA	GG	GG	AA	AA	GG	--	AA	GG	GG	AA	AA	GG	AA	AA	GG	AA	AA	AA	GG	AA	GG	AA	AA	GG	AG	AA	AA	GG	GG	AA	AA	AA	AA	AA	GG	GG	--	GG	GG	GG	GG	--	GG	GG	GG
Gm13_28323043_C_T	Gm13	29516674	TT	CC	TT	TT	CC	--	TT	--	--	TT	TT	CC	CC	TT	CC	TC	TT	TC	--	CC	TT	--	TT	CC	CC	TT	--	CC	--	TT	TT	CC	CC	CC	CC	CC	TT	TT	TT	TT	TT	TT	TT	--	TT	TT	TT
Gm13_28437643_G_A	Gm13	29630754	GG	AA	GG	GG	AA	AA	GG	AG	AA	GG	GG	AA	AA	GG	AA	AA	GG	AA	AA	AA	GG	AA	GG	AA	AA	GG	AG	AA	AA	GG	GG	AA	AA	AA	AA	AA	GG	GG	GG	GG	GG	GG	GG	AG	GG	GG	GG
Gm13_28544194_T_C	Gm13	29741893	TT	CC	TT	TT	CC	CC	TT	--	CC	TT	TT	CC	CC	TT	CC	CC	TT	CC	CC	CC	TT	CC	TT	CC	CC	TT	TC	CC	CC	TT	TT	CC	CC	CC	CC	CC	TT	TT	TT	TT	TT	TT	TT	TC	TT	TT	TT
Gm13_28826405_A_C	Gm13	30026216	AA	AA	AA	AA	AA	AA	AA	AA	AA	AA	AA	AA	AA	AA	AA	AA	AA	AA	AA	AA	AA	AA	AA	AA	AA	AA	AA	AA	AA	AA	AA	AA	AA	AA	AA	AA	AA	AA	AA	AA	AA	AA	AA	AA	AA	AA	AA
Gm13_28868130_A_C	Gm13	30067943	AA	AA	AA	AA	--	AA	--	AA	--	--	--	AA	AA	AA	--	AA	AA	--	AA	AA	--	AA	AA	AA	AA	--	AA	AA	AA	AA	AA	AA	AA	--	AA	AA	AA	AA	AA	AA	--	AA	AA	AA	AA	AA	AA
Gm13_28918187_A_C	Gm13	30117998	AA	AA	AA	AA	AA	AA	AA	AA	AA	AA	AA	AA	AA	AA	AA	AA	AA	AA	AA	AA	AA	AA	AA	AA	AA	AA	AA	AA	AA	AA	AA	AA	AA	AA	AA	AA	AA	AA	AA	AA	AA	AA	AA	AA	AA	AA	AA
Gm13_28957669_T_C	Gm13	30157326	TC	CC	TT	TT	CC	CC	TT	TC	CC	TT	TT	CC	CC	TT	CC	--	TT	CC	CC	CC	TT	CC	TT	CC	CC	TT	--	CC	CC	TT	--	CC	CC	CC	CC	CC	TT	TT	TC	TT	TT	TT	TT	--	TT	TT	TT
Gm13_29265240_A_G	Gm13	30465386	GG	AA	GG	GG	AA	AA	GG	--	AA	GG	GG	AA	AA	GG	AA	AA	GG	AA	AA	AA	GG	AA	GG	AA	AA	GG	GG	AA	AA	GG	GG	AA	AA	AA	AA	GG	GG	GG	--	GG	GG	GG	GG	AG	GG	GG	GG
Gm13_29375136_A_G	Gm13	30575285	AA	AA	AA	AA	AA	AA	AA	AA	AA	AA	AA	AA	AA	AA	AA	AA	AA	AA	AA	AA	AA	AA	AA	AA	AA	AA	AA	AA	AA	AA	AA	AA	AA	AA	AA	AA	AA	AA	AA	AA	AA	AA	AA	AA	AA	AA	AA
Gm13_29481243_C_A	Gm13	30681387	CC	AA	CC	CC	AA	AA	CC	--	AA	CC	CC	AA	AA	CC	AA	AA	CC	AA	AA	AA	CC	AA	CC	AA	AA	CC	CC	AA	AA	CC	CC	AA	AA	AA	AA	CC	CC	CC	CC	CC	CC	CC	CC	AC	CC	CC	CC
Gm13_29565413_G_A	Gm13	30765585	GG	GG	GG	GG	GG	GG	GG	GG	GG	GG	GG	GG	GG	GG	GG	GG	GG	GG	GG	GG	GG	GG	GG	GG	GG	GG	GG	GG	GG	GG	GG	GG	GG	GG	GG	GG	GG	GG	GG	GG	GG	GG	GG	GG	GG	GG	GG
Gm13_29677928_G_T	Gm13	30875555	GG	GG	GG	GG	GG	GG	GG	GG	GG	GG	GG	GG	GG	GG	GG	GG	GG	GG	GG	GG	GG	GG	GG	GG	GG	GG	GG	GG	GG	GG	GG	GG	GG	GG	GG	GG	GG	GG	GG	GG	GG	GG	GG	GG	GG	GG	GG
Gm13_29739984_C_A	Gm13	30937609	CC	CC	CC	CC	CC	CC	CC	CC	CC	CC	CC	CC	CC	CC	CC	CC	CC	CC	CC	CC	CC	CC	CC	CC	CC	CC	CC	CC	CC	CC	CC	CC	CC	CC	CC	CC	CC	CC	CC	CC	CC	CC	CC	CC	CC	CC	CC
Gm13_29808335_C_T	Gm13	31005956	CC	CC	CC	CC	CC	CC	CC	CC	CC	CC	CC	CC	CC	CC	CC	CC	CC	CC	CC	CC	CC	CC	CC	CC	CC	CC	CC	CC	CC	CC	CC	CC	CC	CC	CC	CC	CC	CC	CC	CC	CC	CC	CC	CC	CC	CC	CC
Gm13_29858691_C_A	Gm13	31040358	CC	CC	CC	CC	CC	CC	CC	CC	CC	CC	CC	CC	CC	CC	CC	CC	CC	CC	CC	CC	CC	CC	CC	CC	CC	CC	CC	CC	CC	CC	CC	CC	CC	CC	CC	CC	CC	CC	CC	CC	CC	CC	CC	CC	CC	CC	CC
Gm13_30078140_A_G	Gm13	31259181	AA	AA	AA	AA	AA	AA	AA	AA	AA	AA	AA	AA	AA	AA	AA	AA	AA	AA	AA	AA	AA	AA	AA	AA	AA	AA	AA	AA	AA	AA	AA	AA	AA	AA	AA	AA	AA	AA	AA	AA	AA	AA	AA	AA	AA	AA	AA
Gm13_30268845_G_A	Gm13	31449060	GG	AG	GG	GG	AA	AA	GG	AG	AA	GG	GG	AA	AA	GG	AA	AA	GG	AA	AA	AA	GG	AA	GG	AA	AA	GG	GG	AA	AA	AA	GG	AA	AA	AA	AA	GG	GG	GG	--	GG	GG	GG	GG	--	GG	GG	GG
Gm13_30310888_T_C	Gm13	31514695	TT	TC	TT	TT	CC	CC	TT	TC	CC	TT	TT	CC	CC	TT	CC	CC	TT	CC	CC	CC	TT	CC	TT	CC	CC	TT	TT	CC	CC	CC	TT	CC	CC	CC	CC	TT	TT	TT	--	TT	TT	TT	TT	--	TT	TT	TT
Gm13_30351547_A_G	Gm13	31555228	AA	AG	AA	AA	GG	GG	AA	AG	GG	AA	AA	GG	GG	AA	GG	GG	AA	GG	GG	GG	AA	GG	AA	GG	GG	AA	AA	GG	GG	GG	AA	GG	GG	GG	GG	AA	AA	AA	--	AA	AA	AA	AA	--	AA	AA	AA
Gm13_30479725_C_T	Gm13	31691971	CC	TC	CC	CC	TT	TT	CC	TC	TT	CC	CC	TT	TT	CC	TT	TT	CC	TT	TT	TT	CC	TT	CC	TT	TT	CC	CC	TT	TT	TT	CC	TT	TT	TT	TT	CC	CC	CC	--	CC	CC	CC	CC	--	CC	CC	CC
Gm13_30578807_C_A	Gm13	31791054	CC	AC	CC	CC	AA	AA	CC	AC	AA	CC	CC	AA	AA	CC	AA	AA	CC	AA	AA	AA	CC	AA	CC	AA	AA	CC	CC	AA	AA	AA	CC	AA	AA	AA	AA	CC	CC	CC	--	CC	CC	CC	CC	AA	CC	CC	CC
Gm13_30744043_A_G	Gm13	31956416	GG	GG	GG	GG	GG	GG	GG	GG	GG	GG	GG	GG	GG	GG	GG	GG	GG	GG	GG	GG	GG	GG	GG	GG	GG	GG	GG	GG	GG	GG	GG	GG	GG	GG	GG	GG	GG	GG	GG	GG	GG	GG	GG	GG	GG	GG	GG
Gm13_30792419_T_C	Gm13	32004792	TT	TT	TT	TT	TT	TT	TT	TT	TT	TT	TT	TT	TT	TT	TT	TT	TT	TT	TT	TT	TT	TT	TT	TT	TT	TT	TT	TT	TT	TT	TT	TT	TT	TT	TT	TT	TT	TT	TT	TT	TT	TT	TT	TT	TT	TT	TT
Gm13_30896864_A_G	Gm13	32109291	GG	GG	GG	GG	GG	GG	GG	GG	GG	GG	GG	GG	GG	GG	GG	GG	GG	GG	GG	GG	GG	GG	GG	GG	GG	GG	GG	GG	GG	GG	GG	GG	GG	GG	GG	GG	GG	GG	GG	GG	GG	GG	GG	--	GG	GG	GG
Gm13_31013252_A_G	Gm13	32225680	GG	GG	GG	GG	GG	GG	GG	GG	GG	GG	GG	GG	GG	GG	GG	GG	GG	GG	GG	GG	GG	GG	GG	GG	GG	GG	GG	GG	GG	GG	GG	GG	GG	GG	GG	GG	GG	GG	GG	GG	GG	GG	GG	GG	GG	GG	GG
Gm13_31079210_G_A	Gm13	32291638	GG	GG	GG	GG	GG	GG	GG	GG	GG	GG	GG	GG	GG	GG	GG	GG	GG	GG	GG	GG	GG	GG	GG	GG	GG	GG	GG	GG	GG	GG	GG	GG	GG	GG	GG	GG	GG	GG	GG	GG	GG	GG	GG	GG	GG	GG	GG
Gm13_31135256_T_C	Gm13	32347696	CC	CC	CC	CC	CC	CC	CC	CC	CC	CC	CC	CC	CC	CC	CC	CC	CC	CC	CC	CC	CC	CC	CC	CC	CC	CC	CC	CC	CC	CC	CC	CC	CC	CC	CC	CC	CC	CC	CC	CC	CC	CC	CC	--	CC	CC	CC
Gm13_31424193_T_G	Gm13	32636682	GG	GG	GG	GG	GG	GG	GG	GG	GG	GG	GG	GG	GG	GG	GG	GG	GG	GG	GG	GG	GG	GG	GG	GG	GG	GG	GG	GG	GG	GG	GG	GG	GG	GG	GG	GG	GG	GG	GG	GG	GG	GG	GG	GG	GG	GG	GG
Gm13_31491632_C_T	Gm13	32704120	TT	TT	TT	TT	TT	TT	TT	TT	TT	TT	TT	TT	TT	TT	TT	TT	TT	TT	TT	TT	TT	TT	TT	TT	TT	TT	TT	TT	TT	TT	TT	TT	TT	TT	TT	TT	TT	TT	TT	TT	TT	TT	TT	TT	TT	TT	TT
Gm13_31602992_A_G	Gm13	32814804	GG	GG	GG	GG	GG	GG	GG	GG	GG	GG	GG	GG	GG	GG	GG	GG	GG	GG	GG	GG	GG	GG	GG	GG	GG	GG	GG	GG	GG	GG	GG	GG	GG	GG	GG	GG	GG	GG	GG	GG	GG	GG	GG	--	GG	GG	GG
Gm13_31736878_G_A	Gm13	32948671	AA	AA	AA	AA	AA	AA	AA	AA	AA	AA	AA	AA	AA	AA	AA	AA	AA	AA	AA	AA	AA	AA	AA	AA	AA	AA	AA	AA	AA	AA	AA	AA	AA	AA	AA	AA	AA	AA	AA	AA	AA	AA	AA	AG	AA	AA	AA
Gm13_31766939_T_G	Gm13	32978732	GG	GG	GG	GG	GG	GG	GG	GG	GG	GG	GG	GG	GG	GG	GG	GG	GG	GG	GG	GG	GG	GG	GG	GG	GG	GG	GG	GG	GG	GG	GG	GG	GG	GG	GG	GG	GG	GG	GG	GG	GG	GG	GG	GG	GG	GG	GG
Gm13_31860090_G_A	Gm13	33071883	--	--	GG	AA	AA	--	GG	GG	AG	GG	AA	AG	GG	GG	AA	AG	GG	AA	AG	AA	GG	AG	AG	AA	AA	GG	GG	AA	AG	GG	AA	AA	AA	AA	AA	GG	GG	AA	--	GG	GG	GG	AG	AG	AA	GG	AA
Gm13_31934756_G_A	Gm13	33146571	AA	--	GG	AA	AA	AA	GG	GG	AG	GG	AA	AA	GG	GG	AA	AA	GG	AA	AA	AA	GG	AA	--	AA	AA	GG	GG	AA	AA	GG	--	AA	AA	AA	AA	GG	GG	AA	--	AA	GG	GG	AA	--	AA	GG	AA
Gm13_32100739_A_G	Gm13	33312556	GG	AG	AA	GG	GG	GG	AA	AA	AG	AA	GG	GG	AA	AA	GG	GG	AA	GG	GG	GG	AA	GG	GG	GG	GG	AA	AA	GG	GG	AA	GG	GG	GG	GG	GG	AA	AA	GG	--	GG	AA	AA	GG	GG	GG	AA	GG
Gm13_32210915_T_C	Gm13	33422715	CC	TC	TT	CC	CC	CC	TT	TT	TC	TT	CC	CC	TT	TT	TT	CC	TT	TT	CC	TT	TT	CC	CC	CC	CC	TT	TT	CC	CC	TT	CC	CC	CC	CC	CC	TT	TT	CC	--	CC	TT	TT	CC	CC	CC	TT	CC
Gm13_32254260_T_C	Gm13	33466062	TT	TT	TT	TT	TT	TT	TT	TT	TT	TT	TT	TT	TT	TT	TT	TT	TT	TT	TT	TT	TT	TT	TT	TT	TT	TT	TT	TT	TT	TT	TC	TT	TT	TT	TT	TT	TT	TT	TT	TT	TT	TT	TT	TC	TT	TT	TT
Gm13_32368683_G_A	Gm13	33580485	AA	AA	AA	AA	AA	AA	AA	AA	AA	AA	AA	AA	AA	AA	AA	AA	AA	AA	AA	AA	AA	AA	AA	AA	AA	AA	AA	AA	AA	AA	AA	AA	AA	AA	AA	AA	AA	AA	AA	AA	AA	AA	AA	AG	AA	AA	AA
Gm13_32435575_G_A	Gm13	33647377	AA	AA	AA	AA	AA	AA	AA	AA	AA	AA	AA	AA	AA	AA	AA	AA	AA	AA	AA	AA	AA	AA	AA	AA	AA	AA	AA	AA	AA	AA	AA	AA	AA	AA	AA	AA	AA	AA	AA	AA	AA	AA	AA	AA	AA	AA	AA
Gm13_32712123_C_A	Gm13	33923772	CC	CC	CC	CC	CC	CC	CC	CC	CC	CC	CC	CC	CC	CC	CC	CC	CC	CC	CC	CC	CC	CC	CC	CC	CC	CC	CC	CC	CC	CC	CC	CC	CC	CC	CC	CC	CC	CC	CC	CC	CC	CC	CC	--	CC	CC	CC
Gm13_32795953_T_G	Gm13	34008029	TT	TT	TT	TT	TT	TT	TT	TT	TT	TT	TT	TT	TT	TT	TT	TT	TT	TT	TT	TT	TT	TT	TT	TT	TT	TT	TT	TT	TT	TT	TT	TT	TT	TT	TT	TT	TT	TT	TT	TT	TT	TT	TT	TG	TT	TT	TT
Gm13_32875289_C_A	Gm13	34087365	CC	AC	AA	CC	CC	CC	CC	AA	AA	AA	CC	CC	AA	AA	AA	CC	AA	AA	CC	CC	AA	CC	CC	CC	CC	AA	AA	CC	CC	AA	CC	CC	CC	CC	CC	AA	AA	CC	AC	CC	AA	--	CC	CC	CC	AA	CC
Gm13_33004100_T_G	Gm13	34216199	GG	--	TT	GG	GG	GG	GG	TT	TT	TT	GG	GG	TT	TT	TT	GG	TT	TG	TT	GG	TT	GG	GG	GG	GG	--	TT	GG	GG	TT	GG	GG	GG	GG	GG	TT	TT	GG	--	GG	TT	TG	GG	GG	GG	TT	GG
Gm13_33027247_T_C	Gm13	34239346	CC	--	TT	CC	CC	CC	CC	TT	TT	TT	CC	CC	TT	TT	TT	CC	TT	--	TT	CC	TT	CC	--	CC	CC	TT	TT	CC	CC	TT	CC	CC	CC	CC	CC	TT	TT	CC	--	CC	TT	TC	CC	CC	CC	TT	CC
Gm13_33113825_A_G	Gm13	34325919	GG	--	AA	GG	GG	GG	GG	AA	AA	AA	GG	--	AA	AA	AA	--	AA	AA	AA	GG	AA	GG	--	GG	GG	AA	AA	GG	GG	AA	GG	GG	GG	GG	GG	AA	AA	GG	--	GG	AA	AA	GG	--	GG	AA	GG
Gm13_33597361_T_G	Gm13	34809421	GG	GG	GG	GG	GG	GG	GG	GG	GG	GG	GG	GG	GG	GG	GG	GG	GG	GG	GG	GG	GG	GG	GG	GG	GG	GG	GG	GG	GG	GG	GG	GG	GG	GG	GG	GG	GG	GG	GG	GG	GG	GG	GG	GG	GG	GG	GG
Gm13_33637077_T_C	Gm13	34849137	CC	TC	TT	CC	TT	CC	CC	TT	TT	TT	CC	--	TT	TT	TT	CC	TT	TT	TT	CC	TT	CC	CC	TT	CC	CC	TT	CC	CC	TT	CC	TT	TT	CC	TT	TC	TT	CC	TC	CC	TT	TT	CC	TC	CC	TT	CC
Gm13_33688582_C_T	Gm13	34900662	CC	TC	TT	CC	TT	CC	CC	TT	TT	TT	CC	TC	TT	TT	TT	CC	TT	TT	TT	CC	TT	TT	CC	TT	CC	CC	TT	CC	CC	TT	CC	TT	TT	CC	TT	TC	TT	CC	TC	CC	TT	--	CC	TC	CC	TT	CC
Gm13_34602307_A_G	Gm13	35814032	GG	AG	AA	GG	AA	GG	GG	AA	AA	AA	GG	--	AA	AA	AA	GG	AA	GG	AA	GG	AA	AA	GG	AA	GG	GG	AA	GG	GG	AA	GG	AA	AA	GG	AA	AG	AA	GG	GG	GG	AA	--	GG	--	GG	AA	GG
Gm13_35854636_G_A	Gm13	36995772	AA	AG	AA	AA	GG	AA	AA	GG	GG	AA	AA	--	GG	AA	GG	AA	GG	AA	GG	AA	GG	AA	AA	GG	AA	GG	AG	AA	AA	GG	AA	GG	GG	AA	GG	AG	GG	AA	AA	AA	GG	GG	AA	GG	AA	GG	AA
Gm13_35909612_G_A	Gm13	37050736	AA	AG	AA	AA	GG	AA	AA	GG	GG	AA	AA	AG	GG	AA	GG	AA	GG	AA	GG	AA	GG	AA	AA	GG	AA	GG	AA	AA	AA	GG	AA	GG	GG	AA	GG	AG	GG	AA	AA	AA	GG	GG	AA	GG	AA	GG	AA
Gm13_36031702_T_C	Gm13	37172826	TT	TT	TT	TT	TT	TT	TT	TT	TT	TT	TT	TT	TT	TT	TT	TT	TT	TT	TT	TT	TT	TT	TT	TT	TT	TT	TT	TT	TT	TT	TT	TT	TT	TT	TT	TT	TT	TT	TT	TT	TT	TT	TT	TT	TT	TT	TT
Gm13_36073020_C_A	Gm13	37214144	AA	AA	AA	AA	CC	AA	AA	CC	CC	AA	AA	AC	CC	AA	CC	AA	CC	AA	CC	AA	CC	AA	AA	CC	AA	--	AA	AA	AA	CC	AA	CC	CC	AA	CC	AA	CC	AA	AA	AA	CC	CC	AA	CC	AA	CC	AA
Gm13_36224364_G_A	Gm13	37365297	GG	GG	GG	GG	AA	GG	GG	AA	AA	GG	GG	GG	AA	GG	AA	GG	AA	GG	AA	GG	AA	GG	GG	AA	GG	AA	GG	GG	GG	AA	GG	AA	AA	GG	AA	AG	AA	GG	GG	GG	AA	AA	GG	AA	GG	AA	GG
Gm13_36316916_C_T	Gm13	37457852	TT	TT	TT	TT	TT	TT	TT	TT	TT	TT	TT	TT	TT	TT	TT	TT	TT	TT	TT	TT	TT	TT	TT	TT	TT	TT	TT	TT	TT	TT	TT	TT	TT	TT	TT	TT	TT	TT	TT	TT	TT	TT	TT	TT	TT	TT	TT
Gm13_36411761_A_G	Gm13	37553062	GG	GG	GG	GG	GG	GG	GG	GG	GG	GG	GG	GG	GG	GG	GG	GG	GG	GG	GG	GG	GG	GG	GG	GG	GG	GG	GG	GG	GG	GG	GG	GG	GG	GG	GG	GG	GG	GG	GG	GG	GG	GG	GG	GG	GG	GG	GG
Gm13_36633721_C_T	Gm13	37774478	CC	CC	CC	CC	TT	CC	CC	TT	TT	CC	CC	CC	CC	CC	TT	CC	TT	CC	TT	CC	TT	CC	CC	TT	CC	TT	CC	CC	CC	TT	CC	TT	TT	CC	TT	CC	TT	CC	CC	CC	TT	TT	CC	TT	CC	TT	CC
Gm13_36716562_G_T	Gm13	37857762	TT	TT	TT	TT	GG	TT	TT	GG	GG	TT	TT	TT	TT	TT	GG	TT	GG	TT	GG	TT	GG	TT	TT	GG	TT	GG	TT	TT	--	GG	TT	GG	GG	TT	GG	TT	GG	TT	TT	TT	GG	GG	TT	GG	TT	GG	TT
Gm13_36886485_G_A	Gm13	38027686	AA	AA	AA	AA	GG	AA	AA	GG	GG	AA	AA	AA	AA	AA	GG	AA	GG	AA	GG	AA	GG	AA	AA	GG	AA	GG	AA	AA	AA	GG	AA	GG	GG	AA	GG	AA	GG	AA	AA	AA	GG	GG	AA	--	AA	GG	AA
Gm13_37204738_A_G	Gm13	38366685	GG	GG	GG	GG	AA	GG	GG	AA	AA	GG	GG	GG	GG	GG	AA	GG	AA	GG	AA	GG	AA	GG	GG	AA	GG	AA	GG	GG	GG	AA	GG	AA	AA	GG	AA	GG	AA	GG	GG	GG	AA	AA	GG	AA	GG	AA	GG
Gm13_38032737_G_A	Gm13	39210206	GG	AA	AA	AA	AA	AA	GG	GG	GG	AA	AA	AA	AA	AA	GG	AA	AA	AA	GG	AA	GG	GG	AA	GG	AA	GG	AA	AA	AA	GG	AA	GG	GG	AA	GG	AA	GG	AA	AA	AA	GG	GG	AA	--	AA	GG	AA
Gm13_38133840_A_C	Gm13	39311323	AA	CC	CC	CC	CC	CC	AA	AA	AA	CC	CC	CC	CC	CC	AA	CC	CC	CC	AA	CC	AA	AA	CC	AA	CC	AA	CC	CC	CC	AA	CC	AA	AA	CC	AA	CC	AA	CC	CC	CC	AA	AA	CC	--	CC	AA	CC
Gm13_38412903_T_G	Gm13	39590255	TT	TT	TT	TT	TT	TT	TT	TT	TT	TT	TT	TT	TT	TT	TT	TT	TT	TT	TT	TT	TT	TT	TT	TT	TT	TT	TT	TT	TT	TT	TT	TT	TT	TT	TT	TT	TT	TT	TT	TT	TT	TT	TT	TT	TT	TT	TT
Gm13_38492652_C_A	Gm13	39670045	AA	CC	CC	CC	CC	CC	AA	AA	AA	CC	CC	CC	CC	CC	AA	CC	CC	CC	CC	CC	CC	AA	CC	AA	CC	AA	CC	CC	CC	AA	CC	AA	AA	CC	AA	AA	AA	CC	CC	CC	CC	AA	CC	AA	CC	AA	CC
Gm13_38554316_C_T	Gm13	39731709	CC	TT	TT	TT	TT	TT	CC	CC	CC	TT	TT	TT	TT	TT	CC	TT	TT	TT	TT	TT	TT	CC	TT	CC	TT	CC	TT	TT	TT	CC	TT	CC	CC	TT	CC	CC	CC	TT	TT	TT	TT	CC	TT	CC	TT	CC	TT
Gm13_38620130_A_G	Gm13	39797053	AA	GG	GG	GG	GG	GG	AA	AA	AA	GG	GG	GG	GG	GG	AA	GG	GG	GG	GG	GG	GG	AA	GG	AA	GG	AA	GG	GG	GG	AA	GG	AA	AA	GG	AA	AA	AA	GG	GG	GG	GG	AA	GG	AA	GG	AA	GG
Gm13_38840706_A_G	Gm13	40017050	GG	GG	GG	GG	GG	GG	GG	GG	GG	GG	GG	GG	GG	GG	GG	GG	GG	GG	GG	GG	GG	GG	GG	GG	GG	GG	GG	GG	GG	GG	GG	GG	GG	GG	GG	GG	GG	GG	GG	GG	GG	GG	GG	GG	GG	GG	GG
Gm13_38988256_T_C	Gm13	40167119	CC	CC	CC	CC	CC	CC	CC	CC	CC	CC	CC	CC	CC	CC	CC	CC	CC	CC	CC	CC	CC	CC	CC	CC	CC	CC	CC	CC	CC	CC	CC	CC	CC	CC	CC	CC	CC	CC	CC	CC	CC	CC	CC	CC	CC	CC	CC
Gm13_39054715_T_C	Gm13	40233656	CC	CC	CC	CC	CC	CC	CC	CC	CC	CC	CC	CC	CC	CC	CC	CC	CC	CC	CC	CC	CC	CC	CC	CC	CC	CC	CC	CC	CC	CC	CC	CC	CC	CC	CC	CC	CC	CC	CC	CC	CC	CC	CC	CC	CC	CC	CC
Gm13_39065528_G_A	Gm13	40244469	AA	AA	AA	AA	AA	AA	AA	AA	AA	AA	AA	AA	AA	AA	AA	AA	AA	AA	AA	AA	AA	AA	AA	AA	AA	AA	AA	AA	AA	AA	AA	AA	AA	AA	AA	AA	AA	AA	AA	AA	AA	AA	AA	AA	AA	AA	AA
Gm13_39307253_G_A	Gm13	40486199	AA	AA	AA	AA	AA	AA	AA	AA	AA	AA	AA	AA	AA	AA	AA	AA	AA	AA	AA	AA	AA	AA	AA	AA	AA	AA	AA	AA	AA	AA	AG	AA	AA	AA	AA	AA	AA	AA	AA	AA	AA	AA	AA	AG	AA	AA	--
Gm13_39378998_G_A	Gm13	40557947	AA	AA	AA	AA	AA	AA	AA	AA	AA	AA	AA	AA	AA	AA	AA	AA	AA	AA	AA	AA	AA	AA	AA	AA	AA	AA	AA	AA	AA	AA	AG	AA	AA	AA	AA	AA	AA	AA	AA	AA	AA	AA	AA	AG	AA	AA	AA
Gm13_39721684_C_A	Gm13	40900709	AA	AA	AA	AA	AA	AA	AA	AA	AA	AA	AA	AA	AA	AA	AA	AA	AA	AA	AA	AA	AA	AA	AA	AA	AA	AA	AA	AA	AA	AA	AA	AA	AA	AA	AA	AA	AA	AA	AA	AA	AA	AA	AA	AA	AA	AA	AA
Gm13_40069069_A_G	Gm13	41247800	GG	GG	GG	GG	GG	GG	GG	GG	GG	GG	GG	GG	GG	GG	GG	GG	GG	GG	GG	GG	GG	GG	GG	GG	GG	GG	GG	GG	GG	GG	GG	GG	GG	GG	GG	GG	GG	GG	GG	GG	GG	GG	GG	GG	GG	GG	GG
Gm13_40114029_C_T	Gm13	41292816	TT	TT	TT	TT	TT	TT	TT	TT	TT	TT	TT	TT	TT	TT	TT	TT	TT	TT	TT	TT	TT	TT	TT	TT	TT	TT	TT	TT	TT	TT	TC	TT	TT	TT	TT	TT	TT	TT	TT	TT	TT	TT	TT	TT	TT	TT	TT
Gm17_3709542_G_A	Gm13	41412436	AA	AA	AA	AA	AA	AA	AA	AA	AA	AA	AA	AA	AA	AA	AA	AA	AA	AA	AA	AA	AA	AA	AA	AA	AA	AA	AA	AA	AA	AA	AG	AA	AA	AA	AA	AA	AA	AA	AA	AA	AA	AA	AA	AA	AA	AA	AA
Gm17_3775685_C_A	Gm13	41478579	--	AA	AA	AA	AA	AA	AA	AA	AA	AA	AA	AA	AA	AA	AA	AA	AA	AA	AA	AA	AA	AA	AA	AA	AA	AA	AA	AA	AA	AA	AC	AA	AA	AA	AA	AA	AA	AA	AA	AA	AA	AA	AA	AA	AA	AA	--
Gm13_40185451_G_A	Gm13	41630848	AA	AA	AA	AA	AA	AA	AA	AA	AA	AA	AA	AA	AA	AA	AA	AA	AA	AA	AA	AA	AA	AA	AA	AA	AA	AA	AA	AA	AA	AA	AG	AA	AA	AA	AA	AA	AA	AA	AA	AA	AA	AA	AA	AA	AA	AA	AA
Gm13_40244844_T_C	Gm13	41690241	CC	CC	CC	CC	CC	CC	CC	CC	CC	CC	CC	CC	CC	CC	CC	CC	CC	CC	CC	CC	CC	CC	CC	CC	CC	CC	CC	CC	CC	CC	CC	CC	CC	CC	CC	CC	CC	CC	CC	CC	CC	CC	CC	CC	CC	CC	CC
Gm13_40434294_C_A	Gm13	41879883	AA	AA	AA	AA	AA	AA	AA	AA	AA	AA	AA	AA	AA	AA	AA	AA	AA	AA	AA	AA	AA	AA	AA	AA	AA	AA	AA	AA	AA	AA	AC	AA	AA	AA	AA	AA	AA	AA	AA	AA	AA	AA	AA	AA	AA	AA	AA
Gm13_40582006_A_G	Gm13	42027599	GG	AA	GG	AA	AA	AA	GG	GG	GG	AA	AA	AA	AA	AA	AA	AA	AA	AA	AA	--	AA	GG	AA	GG	AA	GG	AA	AA	AA	GG	AA	GG	AA	AA	GG	AA	GG	AA	AA	AA	GG	GG	AA	GG	AA	GG	AG
Gm13_40623113_T_C	Gm13	42068706	TT	TT	TT	TT	TT	TT	TT	TT	TT	TT	TT	TT	TT	TT	TT	TT	TT	TT	TT	TT	TT	TT	TT	TT	TT	TT	TT	TT	TT	TT	TT	TT	TT	TT	TT	TT	TT	TT	TT	TT	TT	TT	TT	TT	TT	TT	TT
Gm13_40665132_A_G	Gm13	42110725	AA	AA	AA	AA	AA	AA	AA	AA	AA	AA	AA	AA	AA	AA	AA	AA	AA	AA	AA	AA	AA	AA	AA	AA	AA	AA	AA	AA	AA	AA	AA	AA	AA	AA	AA	AA	AA	AA	AA	AA	AA	AA	AA	AA	AA	AA	AA
Gm13_40715679_A_G	Gm13	42161272	GG	AA	GG	AA	AA	AA	GG	GG	GG	AA	AA	AA	AA	AA	AA	AA	AA	AA	AA	AG	AA	GG	--	GG	AA	GG	AA	AA	AA	GG	AA	GG	AA	AA	GG	AA	GG	AA	AA	AA	GG	GG	AA	GG	AA	GG	AG
Gm13_40977421_G_A	Gm13	42416671	AA	GG	AA	GG	AA	GG	AA	AA	AA	GG	GG	GG	GG	GG	GG	GG	GG	GG	GG	AG	GG	AA	GG	AA	GG	AA	GG	GG	GG	AA	GG	AA	GG	GG	AA	GG	AA	GG	GG	GG	AA	AA	GG	AA	GG	AA	AG
Gm13_41057913_C_T	Gm13	42497612	TT	CC	TT	CC	TT	CC	TT	TT	TT	CC	CC	CC	CC	CC	CC	CC	CC	CC	CC	TC	CC	TT	CC	TT	CC	TT	CC	CC	CC	TT	CC	TT	CC	CC	TT	CC	TT	CC	CC	CC	TT	TT	CC	TT	CC	TT	TC
Gm13_41210917_T_G	Gm13	42650588	GG	TT	GG	TT	GG	TT	GG	GG	GG	TT	TT	TT	TT	TT	TT	TT	TT	TT	TT	TG	TT	GG	TT	GG	TT	GG	TT	TT	TT	GG	TT	GG	TT	TT	GG	TT	GG	TT	TT	TT	GG	GG	TT	GG	TT	GG	TG
Gm13_41312689_T_C	Gm13	42752378	CC	TT	CC	TT	CC	--	CC	CC	CC	TT	--	TT	TT	TT	TT	TT	TT	TT	TT	--	--	CC	--	CC	TT	CC	TT	TT	TT	CC	TT	CC	TT	TT	CC	TT	CC	TT	TT	TT	CC	CC	TT	CC	TT	CC	--
Gm13_41464063_A_C	Gm13	42903598	AA	AA	AA	AA	AA	AA	AA	AA	AA	AA	AA	AA	AA	AA	AA	AA	AA	AA	AA	AA	AA	AA	AA	AA	AA	AA	AA	AA	AA	AA	AA	AA	AA	AA	AA	AA	AA	AA	AA	AA	AA	AA	AA	AA	AA	AA	AA
Gm13_41818065_T_C	Gm13	43257796	TT	TT	TT	TT	TT	TT	TT	TT	TT	TT	TT	TT	TT	TT	TT	TT	TT	TT	TT	TT	TT	TT	TT	TT	TT	TT	TT	TT	TT	TT	TT	TT	TT	TT	TT	TT	TT	TT	TT	TT	TT	TT	TT	TT	TT	TT	TT
Gm13_41886328_C_T	Gm13	43326059	CC	CC	CC	CC	CC	CC	CC	CC	CC	CC	CC	CC	CC	CC	CC	CC	CC	CC	CC	CC	CC	CC	CC	CC	CC	CC	CC	CC	CC	CC	CC	CC	CC	CC	CC	CC	CC	CC	CC	CC	CC	CC	CC	CC	CC	CC	CC
Gm13_42150006_A_G	Gm13	43590044	AA	AA	AA	AA	AA	AA	AA	AA	AA	AA	AA	AA	AA	AA	AA	AA	AA	AA	AA	AA	AA	AA	AA	AA	AA	AA	AA	AA	AA	AA	AA	AA	AA	AA	AA	AA	AA	AA	AA	AA	AA	AA	AA	AA	AA	AA	AA
Gm13_42192487_T_C	Gm13	43632525	TT	TT	TT	TT	TT	TT	TT	TT	TT	TT	TT	TT	TT	TT	TT	TT	TT	TT	TT	TT	TT	TT	TT	TT	TT	TT	TT	TT	TT	TT	TT	TT	TT	TT	TT	TT	TT	TT	TT	TT	TT	TT	TT	TT	TT	TT	TT
Gm13_42263255_C_T	Gm13	43703293	CC	CC	CC	CC	CC	CC	CC	CC	CC	CC	CC	CC	CC	CC	CC	CC	CC	CC	CC	CC	CC	CC	CC	CC	CC	CC	CC	CC	CC	CC	CC	CC	CC	CC	CC	CC	CC	CC	CC	CC	CC	CC	CC	CC	CC	CC	CC
Gm13_42337548_A_C	Gm13	43777586	AA	AA	AA	AA	AA	AA	AA	AA	AA	AA	AA	AA	AA	AA	AA	AA	AA	AA	AA	AA	AA	AA	AA	AA	AA	AA	AA	AA	AA	AA	AA	AA	AA	AA	AA	AA	AA	AA	AA	AA	AA	AA	AA	AA	AA	AA	AA
Gm13_42452681_G_A	Gm13	43873457	GG	GG	GG	GG	GG	GG	GG	GG	GG	GG	GG	GG	GG	GG	GG	GG	GG	GG	GG	GG	GG	GG	GG	GG	GG	GG	GG	GG	GG	GG	GG	GG	GG	GG	GG	GG	GG	GG	GG	GG	GG	GG	GG	GG	GG	GG	GG
Gm13_42868706_C_T	Gm13	44289742	TT	TT	TT	CC	TT	CC	TT	TT	CC	CC	CC	CC	CC	TT	TT	CC	CC	TC	CC	TT	CC	TT	--	TT	CC	TT	CC	CC	TT	TT	CC	TT	CC	CC	TT	TT	TT	CC	CC	CC	TT	TT	CC	CC	CC	TT	CC
Gm13_42920565_A_G	Gm13	44344336	GG	GG	GG	AA	GG	AA	GG	GG	AA	AA	AA	AA	AA	GG	GG	AA	AA	AG	AA	GG	AA	GG	--	GG	AA	GG	AA	AA	GG	GG	AA	GG	AA	AA	GG	GG	GG	AA	AA	AA	GG	GG	AA	AA	AA	GG	AA
Gm13_42988030_G_A	Gm13	44411801	AA	AG	AG	GG	AA	GG	AA	--	AA	GG	GG	GG	GG	AA	AA	GG	GG	GG	GG	AA	GG	AG	GG	--	GG	AG	GG	GG	AG	AA	GG	AA	GG	GG	AA	AA	AA	GG	GG	GG	AA	AG	GG	GG	GG	AA	GG
Gm13_43259421_T_C	Gm13	44683118	CC	CC	CC	TT	CC	TC	CC	CC	CC	TT	TT	TT	TT	CC	CC	TT	TT	--	--	CC	TT	CC	TC	CC	TT	CC	TT	TT	CC	CC	TT	CC	TT	TT	CC	CC	CC	TT	TC	CC	CC	CC	TT	TC	TT	CC	TT
Gm13_43349947_T_C	Gm13	44776012	CC	CC	CC	TT	CC	TC	CC	CC	CC	TT	TT	TT	TT	CC	CC	TT	TT	--	--	CC	TT	CC	TC	CC	TT	CC	TT	TT	--	CC	TT	CC	TT	TT	CC	CC	CC	TT	TC	CC	CC	CC	TT	TC	TT	CC	TT
Gm13_43641774_C_T	Gm13	45076128	TT	TT	TT	CC	TT	CC	TC	TT	TT	CC	CC	CC	CC	TT	TT	CC	CC	TC	CC	TT	CC	TT	CC	TT	CC	TT	CC	CC	TT	TT	CC	TT	CC	CC	TT	TT	TT	CC	--	TT	TT	TT	CC	CC	CC	TT	CC
Gm13_43901091_A_G	Gm13	45335445	GG	GG	GG	AA	GG	--	--	GG	GG	AA	AA	AA	AA	GG	GG	AA	AA	--	--	GG	AA	GG	GG	GG	AA	GG	AA	AA	GG	GG	AA	GG	AA	AA	GG	GG	GG	AA	AG	GG	GG	GG	AA	GG	AA	GG	AA
Gm13_43988715_T_C	Gm13	45433282	CC	CC	CC	CC	CC	CC	CC	CC	CC	CC	CC	CC	CC	CC	CC	CC	CC	CC	CC	CC	CC	CC	CC	CC	CC	CC	CC	CC	CC	CC	CC	CC	CC	CC	CC	CC	CC	CC	CC	CC	CC	CC	CC	CC	CC	CC	CC
Gm14_86112_G_A	Gm14	92589	GG	GG	GG	GG	GG	GG	GG	GG	GG	GG	GG	GG	GG	GG	GG	GG	GG	GG	GG	GG	GG	GG	GG	GG	GG	GG	GG	GG	GG	GG	GG	GG	GG	GG	GG	GG	GG	GG	GG	GG	GG	GG	GG	GG	GG	GG	GG
Gm14_344009_T_C	Gm14	350497	--	TC	TT	TT	TT	--	TT	CC	TT	TT	TT	CC	TT	CC	CC	CC	CC	CC	TT	CC	TT	TT	CC	TT	TT	TT	TT	TT	TT	TT	TT	TT	TT	TT	TT	TT	TC	TT	TC	CC	CC	CC	TT	--	TT	--	TT
Gm14_387906_T_C	Gm14	394402	--	TT	TT	TT	TT	--	TT	CC	TT	TT	TT	CC	TT	CC	CC	CC	CC	CC	TT	CC	TT	TT	--	TT	TT	TT	TT	TT	TT	TT	TT	TT	TT	TT	TT	TT	TC	TT	--	CC	CC	CC	TT	--	TT	--	TT
Gm14_1167509_A_G	Gm14	1169042	--	AA	AA	AA	AA	--	AA	GG	AA	AA	AA	GG	AA	GG	AA	AA	GG	GG	AA	GG	AA	AA	GG	AA	AA	AA	AA	AA	GG	AA	AA	AA	AA	AA	AA	AA	GG	AA	AG	GG	GG	GG	AA	--	AA	GG	AA
Gm14_1340473_G_T	Gm14	1342110	GG	GG	GG	GG	GG	GG	GG	GG	GG	GG	GG	GG	GG	GG	GG	GG	GG	GG	GG	GG	GG	GG	GG	GG	GG	GG	GG	GG	GG	GG	GG	GG	GG	GG	GG	GG	GG	GG	GG	GG	GG	GG	GG	GG	GG	GG	GG
Gm14_1564632_C_T	Gm14	1566268	TT	TT	TT	TT	TT	TT	TT	TT	TT	TT	TT	TT	TT	TT	TT	TT	TT	TT	TT	TT	TT	TT	TT	TT	TT	TT	TT	TT	TT	TT	TT	TT	TT	TT	TT	TT	TT	TT	TT	TT	TT	TT	TT	TT	TT	TT	TT
Gm14_1613564_T_G	Gm14	1615206	GG	GG	GG	GG	GG	GG	GG	TT	GG	GG	GG	TT	GG	TT	GG	GG	TT	TT	GG	TT	GG	GG	TT	GG	GG	GG	GG	GG	TT	GG	GG	GG	GG	GG	GG	TT	TT	GG	--	TT	TT	TT	GG	--	GG	TT	GG
Gm14_1657815_T_G	Gm14	1658941	GG	GG	GG	GG	GG	GG	GG	GG	GG	GG	GG	GG	GG	GG	GG	GG	GG	GG	GG	GG	GG	GG	GG	GG	GG	GG	GG	GG	GG	GG	GG	GG	GG	GG	GG	GG	GG	GG	GG	GG	GG	GG	GG	GG	GG	GG	GG
Gm14_1723025_T_C	Gm14	1724237	CC	CC	CC	CC	CC	CC	CC	CC	CC	CC	CC	CC	CC	CC	CC	CC	CC	CC	CC	CC	CC	CC	CC	CC	CC	CC	CC	CC	CC	CC	CC	CC	CC	CC	CC	CC	CC	CC	CC	CC	CC	CC	CC	CC	CC	CC	CC
Gm14_1804116_C_T	Gm14	1805327	TC	TT	TT	TT	TT	TC	TT	CC	TT	TT	TT	CC	TT	CC	TT	TT	CC	CC	TT	CC	TT	CC	CC	TT	TT	TT	TT	TT	CC	TT	TT	TT	TT	TT	TT	CC	CC	TT	TC	CC	CC	CC	TT	--	TT	--	TT
Gm14_1879468_A_C	Gm14	1874810	CC	CC	CC	CC	CC	CC	CC	CC	CC	CC	CC	CC	CC	CC	CC	CC	CC	CC	CC	CC	CC	CC	CC	CC	CC	CC	CC	CC	CC	CC	CC	CC	CC	CC	CC	CC	CC	CC	CC	CC	CC	CC	CC	CC	CC	CC	CC
Gm14_2131407_C_T	Gm14	2131853	--	CC	CC	CC	CC	--	CC	--	CC	CC	CC	--	CC	TT	CC	CC	TT	TT	CC	TT	CC	--	--	CC	CC	CC	CC	CC	--	CC	CC	CC	CC	CC	CC	TT	TT	CC	--	TT	TT	TT	CC	TC	CC	TC	CC
Gm14_2201279_A_G	Gm14	2201645	AG	AA	AA	AA	AA	AG	AA	GG	--	AA	AA	GG	AA	GG	AA	AA	GG	GG	AA	GG	AA	GG	GG	--	AA	AA	AA	AA	GG	AA	AA	AA	AA	AA	AA	GG	GG	AA	AG	GG	GG	GG	AA	--	AA	--	AA
Gm14_2266236_A_G	Gm14	2266551	--	AA	AA	AA	AA	AG	AA	GG	AA	AA	AA	--	AA	GG	GG	AA	GG	GG	AA	GG	AA	GG	GG	AA	AA	AA	AA	AA	GG	AA	AA	AA	AA	AA	AA	GG	GG	AA	AG	GG	GG	GG	AA	--	AA	GG	AA
Gm14_2311158_G_A	Gm14	2311478	GG	GG	GG	GG	GG	GG	GG	AA	GG	GG	GG	AA	GG	AA	AA	GG	AA	AA	GG	AA	GG	AA	AA	GG	GG	GG	GG	GG	AA	GG	GG	GG	GG	GG	GG	AA	AA	GG	GG	AA	AA	AA	GG	AG	GG	AG	GG
Gm14_2404878_A_G	Gm14	2405177	AA	AA	AA	AA	AA	AA	AA	GG	AA	AA	AA	--	AA	GG	GG	AA	GG	GG	AA	GG	AA	GG	GG	AA	AA	AA	AA	AA	GG	AA	AA	AA	AA	AA	AA	GG	GG	AA	AA	GG	GG	GG	AA	AG	AA	AG	AA
Gm14_2480875_A_C	Gm14	2481174	AA	AA	AA	AA	AA	AA	AA	CC	AA	AA	AA	CC	AA	CC	CC	AA	CC	CC	AA	CC	AA	CC	CC	AA	AA	AA	AA	AA	CC	AA	AA	AA	AA	AA	AA	CC	CC	AA	AA	CC	CC	CC	AA	AC	AA	AC	AA
Gm14_2523580_A_G	Gm14	2523881	AA	AA	AA	AA	AA	AA	AA	AA	AA	AA	AA	AA	AA	AA	AA	AA	AA	AA	AA	AA	AA	AA	AA	AA	AA	AA	AA	AA	AA	AA	AA	AA	AA	AA	AA	AA	AA	AA	AA	AA	AA	AA	AA	AA	AA	AA	AA
Gm14_2650425_C_T	Gm14	2650759	CC	CC	CC	CC	CC	CC	CC	CC	CC	CC	CC	CC	CC	CC	CC	CC	CC	CC	CC	CC	CC	CC	CC	CC	CC	CC	CC	CC	CC	CC	CC	CC	CC	CC	CC	CC	CC	CC	CC	CC	CC	CC	CC	CC	CC	CC	CC
Gm14_2762103_T_C	Gm14	2762413	TT	TT	TT	TT	TT	TT	TT	TT	TT	TT	TT	TT	TT	TT	TT	TT	TT	TT	TT	TT	TT	TT	TT	TT	TT	TT	TT	TT	TT	TT	TT	TT	TT	TT	TT	TT	TT	TT	TT	TT	TT	TT	TT	TT	TT	TT	TT
Gm14_2854797_C_A	Gm14	2854417	CC	CC	CC	CC	CC	CC	CC	CC	CC	CC	CC	CC	CC	CC	CC	CC	CC	CC	CC	CC	CC	CC	CC	CC	CC	CC	CC	CC	CC	CC	CC	CC	CC	CC	CC	CC	CC	CC	CC	CC	CC	CC	CC	CC	CC	CC	CC
Gm14_3042771_T_C	Gm14	3044904	TT	TT	TT	TT	TT	TT	TT	TT	TT	TT	TT	TT	TT	TT	TT	TT	TT	TT	TT	TT	TT	TT	TT	TT	TT	TT	TT	TT	TT	TT	TT	TT	TT	TT	TT	TT	TT	TT	TT	TT	TT	TT	TT	TT	TT	TT	TT
Gm14_3157865_C_A	Gm14	3159986	CC	CC	CC	CC	CC	CC	CC	CC	CC	CC	CC	CC	CC	CC	CC	CC	CC	CC	CC	CC	CC	CC	CC	CC	CC	CC	CC	CC	CC	CC	CC	CC	CC	CC	CC	CC	CC	CC	CC	CC	CC	CC	CC	CC	CC	CC	CC
Gm14_3328915_A_C	Gm14	3339991	AA	AA	AA	AA	AA	AA	AA	AA	AA	AA	AA	AA	AA	AA	AA	AA	AA	AA	AA	AA	AA	AA	AA	AA	AA	AA	AA	AA	AA	AA	AA	AA	AA	AA	AA	AA	AA	AA	AA	AA	AA	AA	AA	AA	AA	AA	AA
Gm14_3470438_G_A	Gm14	3481682	GG	GG	GG	GG	GG	GG	GG	GG	GG	GG	GG	GG	GG	GG	GG	GG	GG	GG	GG	GG	GG	GG	GG	GG	GG	GG	GG	GG	GG	GG	GG	GG	GG	GG	GG	GG	GG	GG	GG	GG	GG	GG	GG	GG	GG	GG	GG
Gm14_3750971_G_A	Gm14	3763434	GG	GG	GG	GG	GG	GG	GG	GG	GG	GG	GG	GG	GG	GG	GG	GG	GG	GG	GG	GG	GG	GG	GG	GG	GG	GG	GG	GG	GG	GG	GG	GG	GG	GG	GG	GG	GG	GG	GG	GG	GG	GG	GG	GG	GG	GG	GG
Gm14_3779194_T_C	Gm14	3791659	TT	TT	TT	TT	TT	TT	TT	TT	TT	TT	TT	TT	TT	TT	TT	TT	TT	TT	TT	TT	TT	TT	TT	TT	TT	TT	TT	TT	TT	TT	TT	TT	TT	TT	TT	TT	TT	TT	TT	TT	TT	TT	TT	TT	TT	TT	TT
Gm14_3932543_G_A	Gm14	3945360	GG	GG	GG	GG	GG	GG	GG	GG	GG	GG	GG	GG	GG	GG	GG	GG	GG	GG	GG	GG	GG	GG	GG	GG	GG	GG	GG	GG	GG	GG	GG	GG	GG	GG	GG	GG	GG	GG	GG	GG	GG	GG	GG	GG	GG	GG	GG
Gm14_4056741_C_T	Gm14	4069652	CC	CC	CC	CC	CC	CC	CC	CC	CC	CC	CC	CC	CC	CC	CC	CC	CC	CC	CC	CC	CC	CC	CC	CC	CC	CC	CC	CC	CC	CC	CC	CC	CC	CC	CC	CC	CC	CC	CC	CC	CC	CC	CC	CC	CC	CC	CC
Gm14_4770786_C_T	Gm14	4856342	TT	TT	TT	TT	TT	TT	TT	TT	TT	TT	TT	TT	TT	TT	TT	TT	TT	TT	TT	TT	TT	TT	TT	TT	TT	TT	TT	TT	TT	TT	TT	TT	TT	TT	TT	TT	TT	TT	TT	TT	TT	TT	TT	TT	TT	TT	TT
Gm14_4889916_T_C	Gm14	4974018	TC	CC	TT	TT	TT	TC	TT	CC	TT	TT	TT	CC	TT	TT	CC	CC	CC	CC	--	CC	CC	CC	CC	--	CC	TT	TT	CC	TT	TT	TT	TT	CC	TT	TT	TT	TT	TT	TT	CC	CC	CC	TT	TT	TT	TT	TT
Gm14_4956317_G_A	Gm14	5040727	AA	GG	AA	AA	AA	AA	AA	GG	AA	AA	AA	--	AA	AA	GG	GG	GG	GG	AA	GG	GG	GG	GG	AA	GG	AA	AA	GG	AA	AA	AA	AA	GG	AA	AA	AA	AA	AA	AA	GG	GG	GG	AA	AA	AA	AA	AA
Gm14_5031070_G_A	Gm14	5115479	AA	GG	AA	AA	AA	AG	AA	GG	AA	AA	AA	AG	AA	AA	GG	--	GG	--	--	GG	GG	GG	GG	--	GG	AA	AA	GG	AA	AA	AA	AA	GG	AA	AA	AA	AA	AA	AA	GG	GG	GG	AA	AA	AA	AA	AA
Gm14_5105291_C_T	Gm14	5189720	TT	CC	TT	TT	TT	TT	TT	CC	TT	TT	TT	CC	TT	TT	CC	CC	CC	CC	TT	CC	CC	CC	TT	TT	CC	TT	TT	CC	TT	TT	TT	TT	CC	TT	TT	TT	TT	TT	TT	CC	CC	CC	TT	TT	TT	TT	TT
Gm14_5500948_A_G	Gm14	5611378	GG	AA	GG	GG	GG	GG	GG	AA	GG	GG	GG	AA	GG	GG	AA	AA	AA	AA	GG	AA	AA	AA	GG	GG	AA	GG	GG	AA	GG	GG	GG	GG	AA	GG	GG	GG	GG	GG	GG	AA	AA	AA	GG	GG	GG	GG	GG
Gm14_5908034_T_C	Gm14	6019064	TT	TT	TT	TT	TT	TT	TT	TT	TT	TT	TT	TT	TT	TT	TT	TT	TT	TT	TT	TT	TT	TT	TT	TT	TT	TT	TT	TT	TT	TT	TT	TT	TT	TT	TT	TT	TT	TT	TT	TT	TT	TT	TT	TT	TT	TT	TT
Gm14_6024101_T_C	Gm14	6135158	TT	TT	TT	TT	TT	TT	TT	TT	TT	TT	TT	TT	TT	TT	TT	TT	TT	TT	TT	TT	TT	TT	TT	TT	TT	TT	TT	TT	TT	TT	TT	TT	TT	TT	TT	TT	TT	TT	TT	TT	TT	TT	TT	TT	TT	TT	TT
Gm14_6203160_A_G	Gm14	6314219	AA	AA	AA	AA	AA	AA	AA	AA	AA	AA	AA	AA	AA	AA	AA	AA	AA	AA	AA	AA	AA	AA	AA	AA	AA	AA	AA	AA	AA	AA	AA	AA	AA	AA	AA	AA	AA	AA	AA	AA	AA	AA	AA	AA	AA	AA	AA
Gm14_6448182_T_G	Gm14	6551353	GG	GG	GG	GG	GG	GG	GG	GG	GG	GG	GG	GG	GG	GG	--	GG	GG	GG	GG	GG	GG	GG	GG	GG	--	--	GG	GG	GG	GG	GG	GG	GG	GG	GG	GG	GG	GG	GG	GG	GG	GG	GG	GG	GG	GG	GG
Gm14_6458854_A_G	Gm14	6561966	GG	GG	GG	GG	GG	GG	GG	GG	GG	GG	GG	GG	GG	GG	GG	GG	GG	GG	GG	GG	GG	GG	GG	GG	GG	GG	GG	GG	GG	GG	GG	GG	GG	GG	GG	GG	GG	GG	GG	GG	GG	GG	GG	GG	GG	GG	GG
Gm14_6659109_T_C	Gm14	6769526	CC	CC	CC	CC	CC	CC	CC	CC	CC	CC	CC	CC	CC	CC	CC	CC	CC	CC	CC	CC	CC	CC	CC	CC	CC	CC	CC	CC	CC	CC	CC	CC	CC	CC	CC	CC	CC	CC	CC	CC	CC	CC	CC	CC	CC	CC	CC
Gm14_6912739_G_A	Gm14	7019688	AA	AA	AA	AA	AA	AA	AA	AA	AA	AA	AA	AA	AA	AA	AA	AA	AA	AA	AA	AA	AA	AA	AA	AA	AA	AA	AA	AA	AA	AA	AA	AA	AA	AA	AA	AA	AA	AA	AA	AA	AA	AA	AA	AA	AA	AA	AA
Gm14_7151265_G_A	Gm14	7259161	GG	GG	GG	GG	GG	GG	GG	GG	GG	GG	GG	GG	GG	GG	GG	GG	GG	GG	GG	GG	GG	GG	GG	GG	GG	GG	GG	GG	GG	GG	GG	GG	GG	GG	GG	GG	GG	GG	GG	GG	GG	GG	GG	GG	GG	GG	GG
Gm14_7195140_G_A	Gm14	7302532	AA	AA	AA	AA	AA	AA	AA	AA	AA	AA	AA	AA	AA	AA	AA	AA	AA	AA	AA	AA	AA	AA	AA	AA	AA	AA	AA	AA	AA	AA	AA	AA	AA	AA	AA	AA	AA	AA	AA	AA	AA	AA	AA	AA	AA	AA	AA
Gm14_8288373_T_G	Gm14	8080546	TT	TT	TT	TT	TT	TG	TT	GG	TT	TT	TT	GG	GG	TT	GG	GG	GG	GG	TT	TT	GG	--	TT	TT	TT	TT	TT	GG	TT	TT	TT	TT	TT	TT	TT	--	GG	TT	TG	TT	TT	TT	TT	TT	TT	GG	TT
Gm14_8918021_T_G	Gm14	8709515	GG	GG	GG	GG	GG	TG	GG	GG	GG	GG	GG	GG	TT	GG	TT	--	TT	TG	GG	GG	TT	--	GG	GG	GG	GG	GG	TT	--	GG	GG	GG	GG	GG	GG	GG	TT	GG	TG	GG	GG	GG	GG	GG	GG	TT	GG
Gm14_9087566_C_A	Gm14	8879534	AA	AA	AA	AA	AA	AA	AA	AA	AA	AA	AA	AA	CC	AA	CC	CC	CC	--	AA	AA	CC	CC	AA	AA	AA	AA	AA	CC	AA	AA	AA	AA	AA	AA	AA	AA	CC	AA	AA	AA	AA	AA	AA	AA	AA	CC	AA
Gm14_9258533_G_A	Gm14	9050779	AG	AA	AA	AA	AA	AG	AA	AA	AA	AA	AA	AA	GG	AA	GG	--	GG	--	--	AA	GG	GG	AA	AA	AA	AA	AA	GG	AG	AA	AA	AA	AA	AA	AA	AA	GG	AA	AG	AA	AA	AA	AA	AA	AA	GG	AA
Gm14_9307586_A_G	Gm14	9099832	AA	AA	AA	AA	AA	AA	AA	AA	AA	AA	AA	AA	GG	AA	GG	GG	GG	--	AA	AA	GG	--	AA	AA	AA	GG	AA	GG	AA	AA	AA	AA	AA	AA	AA	AA	GG	AA	AA	AA	GG	AA	AA	AA	AA	GG	AA
Gm14_9803364_T_G	Gm14	9595999	GG	GG	GG	GG	GG	GG	GG	GG	GG	GG	GG	GG	GG	GG	GG	GG	GG	GG	GG	GG	GG	GG	GG	GG	GG	GG	GG	GG	GG	GG	GG	GG	GG	GG	GG	GG	GG	GG	GG	GG	GG	GG	GG	GG	GG	GG	GG
Gm14_9907255_C_T	Gm14	9699675	TT	TT	TT	TT	TT	TT	TT	TT	TT	TT	TT	TT	TT	TT	TT	TT	TT	TT	TT	TT	TT	TT	TT	TT	TT	TT	TT	TT	TT	TT	TT	TT	TT	TT	TT	TT	TT	TT	TT	TT	TT	TT	TT	TT	TT	TT	TT
Gm14_10071491_C_T	Gm14	9863990	TT	TT	TT	TT	TT	TT	TT	TT	TT	TT	TT	TT	TT	TT	TT	TT	TT	TT	TT	TT	TT	TT	TT	TT	TT	TT	TT	TT	TT	TT	TT	TT	TT	TT	TT	TT	TT	TT	TT	TT	TT	TT	TT	TT	TT	TT	TT
Gm14_10197799_A_G	Gm14	9990544	GG	GG	GG	GG	GG	GG	GG	GG	GG	GG	GG	GG	GG	GG	GG	GG	GG	GG	GG	GG	GG	GG	GG	GG	GG	GG	GG	GG	GG	GG	GG	GG	GG	GG	GG	GG	GG	GG	GG	GG	GG	GG	GG	GG	GG	GG	GG
Gm14_10360733_C_T	Gm14	10153478	--	CC	CC	CC	CC	--	CC	CC	CC	CC	CC	CC	TT	CC	TT	--	TT	TC	CC	TT	TT	--	CC	CC	CC	TT	CC	TT	CC	CC	CC	CC	CC	CC	CC	CC	TT	CC	CC	CC	TT	CC	CC	CC	CC	TT	CC
Gm14_10409229_T_G	Gm14	10201982	GG	GG	GG	GG	GG	GG	GG	GG	GG	GG	GG	GG	GG	GG	GG	GG	GG	GG	GG	GG	GG	GG	GG	GG	GG	GG	GG	GG	GG	GG	GG	GG	GG	GG	GG	GG	GG	GG	GG	GG	GG	GG	GG	GG	GG	GG	GG
Gm14_10477535_C_T	Gm14	10270279	CC	CC	CC	CC	CC	CC	CC	CC	CC	CC	CC	CC	TT	CC	TT	--	TT	TC	CC	TT	TT	TC	CC	CC	CC	TT	CC	TT	CC	CC	CC	CC	CC	CC	CC	CC	TT	CC	CC	CC	TT	CC	CC	CC	CC	TT	CC
Gm14_10517826_C_T	Gm14	10310570	TC	TT	TT	TT	TT	TC	TT	TT	TT	TT	TT	TT	CC	TT	CC	--	CC	--	--	CC	CC	--	TT	TT	TT	CC	TT	CC	TC	TT	TT	TT	TT	TT	TT	TT	CC	TT	--	TT	CC	TT	TT	TT	TT	CC	TT
Gm14_10575538_G_A	Gm14	10367765	GG	GG	GG	GG	GG	GG	GG	GG	GG	GG	GG	GG	AA	GG	AA	AA	AA	AG	GG	AA	AA	AA	GG	GG	GG	AA	GG	AA	GG	GG	GG	GG	GG	GG	GG	GG	AA	GG	GG	GG	AA	GG	GG	GG	GG	AA	GG
Gm14_10704639_A_G	Gm14	10496865	GG	GG	GG	GG	GG	GG	GG	GG	GG	GG	GG	GG	GG	GG	GG	GG	GG	GG	GG	GG	GG	GG	GG	GG	GG	GG	GG	GG	GG	GG	GG	GG	GG	GG	GG	GG	GG	GG	GG	GG	GG	GG	GG	GG	GG	GG	GG
Gm14_12224854_G_A	Gm14	12017581	AA	AA	AA	AA	AA	AA	AA	AA	AA	AA	AA	AA	AA	AA	AA	AA	AA	AA	AA	AA	AA	AA	AA	AA	AA	AA	AA	AA	AA	AA	AA	AA	AA	AA	AA	AA	AA	AA	AA	AA	AA	AA	AA	AA	AA	AA	AA
Gm14_12712102_T_C	Gm14	12515770	CC	CC	CC	CC	CC	CC	CC	CC	CC	CC	CC	CC	CC	CC	CC	CC	CC	CC	CC	CC	CC	CC	CC	CC	CC	CC	CC	CC	CC	CC	CC	CC	CC	CC	CC	CC	CC	CC	CC	CC	CC	CC	CC	CC	CC	CC	CC
Gm14_13510414_A_G	Gm14	13312001	GG	GG	GG	GG	GG	GG	GG	GG	GG	GG	GG	GG	GG	GG	GG	GG	GG	GG	GG	GG	GG	GG	GG	GG	GG	GG	GG	GG	GG	GG	GG	GG	GG	GG	GG	GG	GG	GG	GG	GG	GG	GG	GG	GG	GG	GG	GG
Gm14_13557173_C_A	Gm14	13358759	--	AA	AA	AA	AA	AA	AA	AA	AA	AA	AA	AA	AA	AA	AA	AA	AA	AA	AA	AA	AA	AA	AA	AA	AA	AA	AA	AA	AA	AA	AA	AA	AA	AA	AA	AA	AA	AA	AA	AA	AA	AA	AA	AA	AA	AA	AA
Gm14_32629667_A_C	Gm14	15779318	AA	AA	AA	AA	AA	AC	AA	AA	--	AA	AA	AA	CC	CC	CC	CC	CC	--	AA	CC	CC	CC	AC	AA	--	CC	AA	CC	--	AA	AA	AA	AA	AA	AA	AA	CC	AA	AC	AA	CC	CC	AA	AA	AA	CC	AA
Gm14_32943443_C_T	Gm14	16115896	CC	CC	CC	CC	CC	--	CC	CC	CC	CC	CC	CC	TT	TT	TT	--	TT	TC	CC	TT	TT	TC	--	CC	TC	TT	CC	TT	CC	CC	CC	CC	CC	CC	CC	CC	TT	CC	--	CC	TT	--	CC	CC	CC	TT	CC
Gm14_33918871_C_T	Gm14	17099998	CC	CC	CC	CC	CC	--	CC	CC	CC	CC	CC	CC	TT	TT	TT	TT	TT	TC	CC	TT	TT	--	TC	CC	TC	TT	CC	TT	CC	CC	CC	CC	CC	CC	CC	CC	TT	CC	TC	CC	TT	TT	CC	CC	CC	TT	CC
Gm14_34265654_T_C	Gm14	17442487	TT	TT	TT	TT	TT	--	TT	TT	TT	TT	TT	TT	CC	CC	CC	--	CC	TC	TT	CC	CC	--	--	TT	TC	CC	TT	CC	TT	TT	TT	TT	TT	TT	TT	TT	CC	TT	TC	TT	CC	CC	TT	TT	TT	CC	TT
Gm14_35678375_G_A	Gm14	18849056	GG	GG	GG	GG	GG	AG	GG	GG	GG	GG	GG	GG	AA	AA	AA	AA	AA	--	GG	AA	AA	--	AG	GG	--	AA	GG	AA	GG	GG	GG	GG	GG	GG	GG	GG	AA	GG	AG	GG	AA	AA	GG	GG	GG	AA	GG
Gm14_17569578_A_G	Gm14	21700497	GG	GG	GG	GG	GG	GG	GG	GG	GG	GG	GG	GG	GG	GG	GG	GG	GG	GG	GG	GG	GG	GG	GG	GG	GG	GG	GG	GG	GG	GG	GG	GG	GG	GG	GG	GG	GG	GG	GG	GG	GG	GG	GG	GG	GG	GG	GG
Gm14_18515404_A_G	Gm14	22645728	GG	GG	GG	GG	GG	GG	GG	GG	GG	GG	GG	GG	GG	GG	GG	GG	GG	GG	GG	GG	GG	GG	GG	GG	GG	GG	GG	GG	GG	GG	GG	GG	GG	GG	GG	GG	GG	GG	GG	GG	GG	GG	GG	GG	GG	GG	GG
Gm14_18927676_T_C	Gm14	23057134	CC	CC	CC	CC	CC	CC	CC	CC	CC	CC	CC	CC	CC	CC	CC	CC	CC	CC	CC	CC	CC	CC	CC	CC	CC	CC	CC	CC	CC	CC	CC	CC	CC	CC	CC	CC	CC	CC	CC	CC	CC	CC	CC	CC	CC	CC	CC
Gm14_19030405_G_A	Gm14	23160034	GG	GG	GG	GG	GG	GG	GG	GG	GG	GG	GG	GG	AA	AA	AA	AA	AA	AG	GG	AA	AA	AA	GG	GG	GG	AA	GG	AA	GG	GG	GG	GG	GG	GG	GG	GG	AA	GG	GG	GG	AA	AA	GG	GG	GG	AA	GG
Gm14_19103544_T_C	Gm14	23233125	CC	CC	CC	CC	CC	CC	CC	CC	CC	CC	CC	CC	CC	CC	CC	CC	CC	CC	CC	CC	CC	CC	CC	CC	CC	CC	CC	CC	CC	CC	CC	CC	CC	CC	CC	CC	CC	CC	CC	CC	CC	CC	CC	CC	CC	CC	CC
Gm14_19373649_A_G	Gm14	23503557	GG	GG	GG	GG	GG	GG	GG	GG	GG	GG	GG	GG	GG	GG	GG	GG	GG	GG	GG	GG	GG	GG	GG	GG	GG	GG	GG	GG	GG	GG	GG	GG	GG	GG	GG	GG	GG	GG	GG	GG	GG	GG	GG	GG	GG	GG	GG
Gm14_20045677_A_G	Gm14	24192109	GG	GG	GG	GG	GG	GG	GG	GG	GG	GG	GG	GG	AA	AA	AA	AA	AA	AG	GG	AA	AA	AG	GG	GG	GG	AA	GG	AA	GG	GG	GG	GG	GG	GG	GG	GG	AA	GG	GG	GG	AA	AA	GG	GG	GG	AA	GG
Gm14_20914356_G_T	Gm14	25070555	TT	TT	TT	TT	TT	TT	TT	TT	TT	TT	TT	TT	GG	GG	GG	GG	GG	TG	TT	GG	GG	GG	TT	TT	TT	GG	TT	GG	TT	TT	TT	TT	TT	TT	TT	TT	GG	TT	TT	TT	GG	GG	TT	TT	TT	GG	TT
Gm14_21921074_T_C	Gm14	26059250	--	CC	CC	CC	CC	--	CC	CC	CC	CC	CC	CC	TT	TT	TT	TT	TT	TC	CC	TT	TT	--	--	CC	CC	TT	CC	TT	CC	CC	CC	CC	CC	CC	CC	CC	TT	CC	CC	CC	TT	TT	CC	CC	CC	TT	CC
Gm14_22224138_A_G	Gm14	26354793	GG	GG	GG	GG	GG	GG	GG	GG	GG	GG	GG	GG	AA	AA	AA	AA	AA	AG	GG	AA	AA	AA	GG	GG	GG	AA	GG	AA	GG	GG	GG	GG	GG	GG	GG	GG	AA	GG	GG	GG	AA	AA	GG	GG	GG	AA	GG
Gm14_24016030_A_C	Gm14	28132962	CC	CC	CC	CC	CC	CC	CC	CC	CC	CC	CC	CC	AA	AA	AA	--	AA	AC	CC	AA	AA	AC	CC	CC	CC	AA	CC	AA	CC	CC	CC	CC	CC	CC	CC	CC	AA	CC	CC	CC	AA	--	CC	CC	CC	AA	CC
Gm14_27809405_T_G	Gm14	31978272	--	GG	GG	GG	GG	TG	GG	GG	GG	GG	GG	GG	TT	TT	TT	TT	TT	--	GG	TT	TT	--	TG	GG	GG	TT	GG	TT	GG	GG	GG	GG	GG	GG	GG	GG	TT	GG	TG	GG	TT	TT	GG	GG	GG	TT	GG
Gm14_27937142_C_T	Gm14	32105943	CC	CC	CC	CC	CC	--	CC	CC	CC	CC	CC	CC	TT	TT	TT	TT	TT	TC	CC	TT	TT	--	--	CC	CC	TT	CC	TT	CC	CC	CC	CC	CC	CC	CC	CC	TT	CC	--	CC	TT	TT	CC	CC	CC	TT	CC
Gm14_28158698_T_C	Gm14	32327489	TT	TT	TT	TT	TT	TT	TT	TT	TT	TT	TT	TT	CC	CC	CC	TC	CC	--	TT	CC	CC	TC	--	TT	TT	CC	TT	CC	TT	TT	TT	TT	TT	TT	TT	TT	CC	TT	--	TT	CC	--	TT	TT	TT	CC	TT
Gm14_28361034_A_G	Gm14	32529543	AA	AA	AA	AA	AA	AG	AA	AA	AA	AA	AA	AA	GG	GG	GG	GG	GG	--	AA	GG	GG	--	AG	AA	AA	GG	AA	GG	--	AA	AA	AA	AA	AA	AA	AA	GG	AA	AG	AA	GG	GG	AA	AA	AA	GG	AA
Gm14_30024382_T_C	Gm14	34212172	TT	TT	TT	TT	TT	--	TT	TT	TT	TT	TT	TT	CC	CC	CC	--	CC	TC	TT	CC	CC	--	TC	TT	TC	CC	TT	CC	TT	TT	TT	TT	TT	TT	TT	TT	CC	TT	--	TT	CC	--	TT	TT	TT	CC	TT
Gm14_30760829_T_C	Gm14	34945350	TT	TT	TT	TT	TT	TC	TT	TT	TT	TT	TT	TT	CC	CC	CC	CC	CC	--	TT	CC	CC	--	TC	TT	TC	CC	TT	CC	--	TT	TT	TT	TT	TT	TT	TT	CC	TT	TC	TT	CC	CC	TT	TT	TT	CC	TT
Gm14_31348204_T_C	Gm14	35546575	TT	TT	TT	TT	TT	--	TT	TT	TT	TT	TT	TT	CC	CC	CC	CC	CC	TC	TT	CC	CC	--	TC	TT	TC	CC	TT	CC	TT	TT	TT	TT	TT	TT	TT	TT	CC	TT	TC	TT	CC	CC	TT	TT	TT	CC	TT
Gm14_31829614_G_T	Gm14	36022086	GG	GG	GG	GG	GG	GG	GG	GG	GG	GG	GG	GG	TT	TT	TT	TT	TT	TG	GG	TT	TT	TG	GG	GG	TG	TT	GG	TT	GG	GG	GG	GG	GG	GG	GG	GG	TT	GG	GG	GG	TT	--	GG	GG	GG	TT	GG
Gm14_37234273_G_A	Gm14	36485408	GG	GG	GG	GG	GG	AG	GG	GG	GG	GG	GG	GG	AA	AA	AA	AA	AA	--	GG	AA	AA	--	AG	GG	--	AA	GG	AA	GG	GG	GG	GG	GG	GG	GG	GG	AA	GG	AG	GG	AA	AA	GG	GG	GG	AA	GG
Gm14_37444310_C_T	Gm14	36695550	CC	CC	CC	CC	CC	TC	CC	CC	CC	CC	CC	CC	TT	TT	TT	TT	TT	--	CC	TT	TT	--	TC	CC	--	TT	CC	TT	CC	CC	CC	CC	CC	CC	CC	CC	TT	CC	TC	CC	TT	TT	CC	CC	CC	TT	CC
Gm14_37946546_G_T	Gm14	37236716	GG	GG	GG	GG	GG	--	GG	GG	GG	GG	GG	GG	TT	TT	TT	TT	TT	TG	GG	TT	TT	--	TG	GG	TG	TT	GG	TT	GG	GG	GG	GG	GG	GG	GG	GG	TT	GG	TG	GG	TT	TT	GG	GG	GG	TT	GG
Gm14_38660623_T_C	Gm14	37956056	TT	TT	TT	TT	TT	TC	TT	TT	TT	TT	TT	TT	CC	CC	CC	CC	CC	--	TT	CC	CC	--	TC	TT	TC	CC	TT	CC	TT	TT	TT	TT	TT	TT	TT	TT	CC	TT	TC	TT	CC	CC	TT	TT	TT	CC	TT
Gm14_39336505_C_T	Gm14	38633203	CC	CC	CC	CC	CC	--	CC	CC	CC	CC	CC	CC	TT	TT	TT	TT	TT	--	CC	TT	TT	--	TC	CC	TC	TT	CC	TT	CC	CC	CC	CC	CC	CC	CC	CC	TT	CC	TC	CC	TT	TT	CC	CC	CC	TT	CC
Gm14_40852336_C_T	Gm14	40114946	CC	CC	CC	CC	CC	--	CC	CC	CC	CC	CC	CC	TT	TT	TT	--	TT	TC	CC	TT	TT	TC	--	CC	TC	TT	CC	TT	CC	CC	CC	CC	CC	CC	CC	CC	TT	CC	--	CC	TT	--	CC	CC	CC	TT	CC
Gm14_40986359_T_C	Gm14	40258704	TT	TT	TT	TT	TT	TC	TT	TT	--	TT	TT	TT	CC	CC	CC	--	CC	TC	TT	CC	CC	--	TC	TT	TC	CC	TT	CC	--	TT	TT	TT	TT	TT	TT	TT	CC	TT	TC	TT	CC	CC	TT	TT	TT	CC	TT
Gm14_41251974_T_C	Gm14	40524189	TT	TT	TT	TT	TT	TC	TT	TT	TT	TT	TT	TT	CC	CC	CC	CC	CC	--	TT	CC	CC	--	TC	TT	--	CC	TT	CC	TT	TT	TT	TT	TT	TT	TT	TT	CC	TT	TC	TT	CC	CC	TT	TT	TT	CC	TT
Gm14_41448441_G_A	Gm14	40721874	GG	GG	GG	GG	GG	--	GG	GG	GG	GG	GG	GG	AA	AA	AA	--	AA	--	GG	AA	AA	AG	GG	GG	--	AA	GG	AA	GG	GG	GG	GG	GG	GG	GG	GG	AA	GG	--	GG	AA	--	GG	GG	GG	AA	GG
Gm14_41890154_T_C	Gm14	41162037	TT	TT	TT	TT	TT	TC	TT	TT	TT	TT	TT	TT	CC	CC	CC	CC	CC	--	TT	CC	CC	--	TC	TT	--	CC	TT	CC	--	TT	TT	TT	TT	TT	TT	TT	CC	TT	TC	TT	CC	CC	TT	TT	TT	CC	TT
Gm14_42703536_T_G	Gm14	41972229	TT	TT	TT	TT	TT	TG	TT	TT	TT	TT	TT	TT	GG	GG	GG	GG	GG	--	TT	GG	GG	--	TG	TT	--	GG	TT	GG	--	TT	TT	TT	TT	TT	TT	TT	GG	TT	TG	TT	GG	GG	TT	TT	TT	GG	TT
Gm14_42974017_G_A	Gm14	42248603	GG	GG	GG	GG	GG	--	GG	GG	GG	GG	GG	GG	AA	AA	AA	--	AA	AG	GG	AA	AA	AG	--	GG	AG	AA	GG	AA	GG	GG	GG	GG	GG	GG	GG	GG	AA	GG	--	GG	AA	AG	GG	GG	GG	AA	GG
Gm14_43053930_A_G	Gm14	42323834	AA	AA	AA	AA	AA	AA	AA	AA	AA	AA	AA	AA	AA	AA	AA	AA	AA	AA	AA	AA	AA	AA	AA	AA	AA	AA	AA	AA	AA	AA	AA	AA	AA	AA	AA	AA	AA	AA	AA	AA	AA	AA	AA	AA	AA	AA	AA
Gm14_43139188_A_G	Gm14	42409093	GG	GG	GG	GG	GG	GG	GG	GG	GG	GG	GG	GG	GG	GG	GG	GG	GG	GG	GG	GG	GG	GG	GG	GG	GG	GG	GG	GG	GG	GG	GG	GG	GG	GG	GG	GG	GG	GG	GG	GG	GG	GG	GG	GG	GG	GG	GG
Gm14_43270248_C_T	Gm14	42540527	TT	TT	CC	TT	TT	--	TT	CC	TT	TT	TT	TT	CC	CC	CC	CC	CC	TC	TT	CC	CC	--	--	TT	TC	CC	TT	CC	TC	TT	TT	TT	TT	TT	TT	TT	CC	TT	TC	TT	CC	CC	TT	TT	TT	CC	TT
Gm14_43348217_C_T	Gm14	42618496	TT	TT	TT	TT	TT	TT	TT	TT	TT	TT	TT	TT	TT	TT	TT	TT	TT	TT	TT	TT	TT	TT	TT	TT	TT	TT	TT	TT	TT	TT	TT	TT	TT	TT	TT	TT	TT	TT	TT	TT	TT	TT	TT	TT	TT	TT	TT
Gm14_43417417_T_C	Gm14	42687702	TT	TC	--	TT	TT	--	TT	CC	TT	TT	TT	TT	CC	CC	CC	--	CC	TC	TT	CC	CC	TC	--	TT	TC	CC	TT	CC	TC	TT	TT	TT	TT	TT	TT	TT	CC	TT	TC	TT	CC	--	TT	TT	TT	CC	TT
Gm14_43744309_A_G	Gm14	43013299	GG	GG	GG	GG	GG	GG	GG	GG	GG	GG	GG	GG	GG	GG	GG	GG	GG	GG	GG	GG	GG	GG	GG	GG	GG	GG	GG	GG	GG	GG	GG	GG	GG	GG	GG	GG	GG	GG	GG	GG	GG	GG	GG	GG	GG	GG	GG
Gm14_44146640_T_C	Gm14	43412535	TT	TC	--	TT	TT	--	TT	--	TT	TT	TT	TT	CC	CC	CC	--	CC	TC	TT	CC	CC	TC	--	TT	CC	CC	TT	CC	TC	TT	TT	TT	TT	TT	TT	TT	CC	TT	TC	TT	CC	--	TT	TT	TT	CC	TT
Gm14_44193109_G_A	Gm14	43457807	GG	AG	AA	GG	GG	GG	GG	AA	GG	GG	GG	GG	AA	AA	AA	AA	AA	AG	GG	AA	AA	--	GG	GG	AA	AA	GG	AA	AG	GG	GG	GG	GG	GG	GG	GG	AA	GG	--	GG	AA	AA	GG	GG	GG	AA	GG
Gm14_44393026_T_C	Gm14	43657351	TT	--	CC	TT	TT	TC	TT	CC	--	TT	TT	TT	CC	CC	CC	CC	CC	TC	TT	CC	CC	CC	TC	TT	CC	CC	TT	CC	--	TT	TT	TT	TT	TT	TT	TT	CC	TT	TC	TT	CC	CC	TT	TT	TT	CC	TT
Gm14_44692351_T_C	Gm14	43967770	CC	CC	CC	CC	CC	CC	CC	CC	CC	CC	CC	CC	CC	CC	CC	CC	CC	CC	CC	CC	CC	CC	CC	CC	CC	CC	CC	CC	CC	CC	CC	CC	CC	CC	CC	CC	CC	CC	CC	CC	CC	CC	CC	CC	CC	CC	CC
Gm14_44697544_T_C	Gm14	43972963	CC	CC	CC	CC	CC	CC	CC	CC	CC	CC	CC	CC	CC	CC	CC	CC	CC	CC	CC	CC	CC	CC	CC	CC	CC	CC	CC	CC	CC	CC	CC	CC	CC	CC	CC	CC	CC	CC	CC	CC	CC	CC	CC	CC	CC	CC	CC
Gm14_45186718_A_G	Gm14	44464828	GG	--	AA	GG	GG	AA	GG	AA	GG	GG	GG	GG	AA	AA	AA	AA	AG	AG	GG	AA	GG	--	GG	GG	AA	AA	GG	GG	AG	GG	GG	GG	GG	GG	GG	AA	AA	GG	AG	GG	AA	AA	GG	GG	GG	AA	GG
Gm14_45234122_T_C	Gm14	44512232	TT	TT	TT	TT	TT	TT	TT	TT	TT	TT	TT	TT	TT	TT	TT	TT	TT	TT	TT	TT	TT	TT	TT	TT	TT	TT	TT	TT	TT	TT	TT	TT	TT	TT	TT	TT	TT	TT	TT	TT	TT	TT	TT	TT	TT	TT	TT
Gm14_45457682_A_G	Gm14	44735794	AA	AA	AA	AA	AA	AA	AA	AA	AA	AA	AA	AA	AA	AA	AA	AA	AA	AA	AA	AA	AA	AA	AA	AA	AA	AA	AA	AA	AA	AA	AA	AA	AA	AA	AA	AA	AA	AA	AA	AA	AA	AA	AA	AA	AA	AA	AA
Gm14_45901019_T_C	Gm14	45179507	CC	TC	TT	CC	CC	--	CC	TT	TC	TC	TT	CC	CC	TT	TT	TT	TT	--	CC	TT	CC	CC	--	CC	TT	TT	CC	CC	CC	CC	TT	CC	CC	CC	CC	TT	TT	CC	TT	CC	TT	--	TC	--	TC	TT	CC
Gm14_46205549_C_T	Gm14	45484095	TT	TC	CC	TT	TT	TC	TT	CC	--	TC	CC	TT	TT	CC	CC	CC	TC	TT	TT	CC	TT	TT	TC	TT	CC	CC	TT	TT	--	TT	CC	TT	CC	TT	TT	CC	CC	TT	CC	TT	CC	CC	TC	CC	TC	CC	TT
Gm14_46513248_G_A	Gm14	45801155	--	AG	GG	AA	AA	AG	AA	GG	AG	AG	GG	AA	AA	GG	GG	GG	AG	AA	AA	GG	AA	AA	--	AA	GG	GG	AA	AA	AA	AA	GG	AA	GG	AA	AA	GG	GG	AA	GG	AA	GG	GG	AG	GG	AG	GG	AA
Gm14_46557629_T_G	Gm14	45845534	TG	--	TT	GG	GG	TG	GG	TT	--	TG	TT	GG	GG	TT	TT	TT	TG	GG	GG	TT	GG	GG	TG	GG	TT	TT	GG	GG	--	GG	TT	GG	TT	GG	GG	TT	TT	GG	TT	GG	TT	TT	--	--	TG	TT	GG
Gm14_46635262_T_C	Gm14	45923165	--	--	TT	CC	CC	TC	CC	TT	TC	TC	TT	CC	CC	TT	TT	TT	TC	CC	CC	TT	CC	CC	--	CC	TT	TT	CC	CC	--	CC	TT	CC	TT	CC	CC	TT	TT	CC	TT	CC	TT	TT	--	TT	TC	TT	CC
Gm14_46845195_C_T	Gm14	46134214	CC	CC	CC	CC	CC	CC	CC	CC	CC	CC	CC	CC	CC	CC	CC	CC	CC	CC	CC	CC	CC	CC	CC	CC	CC	CC	CC	CC	CC	CC	CC	CC	CC	CC	CC	CC	CC	CC	CC	CC	CC	CC	CC	CC	CC	CC	CC
Gm14_46898740_A_C	Gm14	46187759	--	CC	AA	CC	CC	AC	CC	AA	--	AC	AA	CC	CC	AA	AA	AA	AC	CC	CC	AA	CC	CC	--	CC	AA	AA	CC	CC	CC	CC	AA	CC	AA	CC	CC	AA	AA	CC	AA	CC	AA	AA	--	--	AC	AA	CC
Gm14_47081002_T_C	Gm14	46375456	TT	TT	TT	TT	TT	TT	TT	TT	TT	TT	TT	TT	TT	TT	TT	TT	TT	TT	TT	TT	TT	TT	TT	TT	TT	TT	TT	TT	TT	TT	TT	TT	TT	TT	TT	TT	TT	TT	TT	TT	TT	TT	TT	TT	TT	TT	TT
Gm14_47299310_T_C	Gm14	46588335	TT	TT	TT	TT	TT	TT	TT	TT	TT	TT	TT	TT	TT	TT	TT	TT	TT	TT	TT	TT	TT	TT	TT	TT	TT	TT	TT	TT	TT	TT	TT	TT	TT	TT	TT	TT	TT	TT	TT	TT	TT	TT	TT	TT	TT	TT	TT
Gm14_47354923_T_C	Gm14	46675129	TC	TT	CC	TT	TT	TT	TT	CC	--	TC	CC	TT	TT	TC	CC	CC	TC	TT	TT	CC	TT	TT	--	TT	CC	CC	TT	TT	TT	TT	TT	TT	CC	TT	TT	CC	CC	TT	CC	TT	CC	CC	CC	CC	CC	CC	TT
Gm14_47418167_T_C	Gm14	46738490	TC	TT	CC	TT	TT	TC	TT	CC	--	TC	CC	TT	TT	--	CC	CC	TC	TT	--	CC	TT	TT	TC	TT	CC	CC	TT	TT	--	TT	TT	TT	CC	TT	TT	CC	CC	TT	CC	TT	CC	CC	CC	CC	CC	CC	TT
Gm14_47475993_G_A	Gm14	46796309	AG	AA	GG	AA	AA	--	AA	GG	--	AG	GG	AA	AA	--	GG	GG	AG	AA	AA	GG	AA	AA	AG	AA	GG	GG	AA	AA	--	AA	AA	AA	GG	AA	AA	GG	GG	AA	GG	AA	GG	GG	GG	GG	GG	GG	AA
Gm14_47565830_C_T	Gm14	46886467	--	CC	--	CC	CC	CC	CC	--	--	CC	TC	CC	CC	--	TT	TT	--	CC	CC	TT	CC	CC	CC	CC	TT	TT	CC	CC	CC	CC	CC	CC	TT	CC	CC	TT	TT	CC	TT	CC	--	TC	--	TC	TT	TT	CC
Gm14_47636308_T_G	Gm14	46956963	TT	TT	TT	TT	TT	TT	TT	TT	TT	TT	TT	TT	TT	TT	--	TT	TT	TT	TT	TT	--	TT	TT	TT	TT	TT	TT	TT	TT	TT	TT	TT	TT	TT	TT	TT	TT	TT	TT	TT	TT	TT	TT	TT	TT	TT	TT
Gm14_47643269_A_G	Gm14	46963924	AA	AA	AA	AA	AA	AA	AA	AA	AA	AA	AA	AA	AA	AA	AA	AA	AA	AA	AA	AA	AA	AA	AA	AA	AA	AA	AA	AA	AA	AA	AA	AA	AA	AA	AA	AA	AA	AA	AA	AA	AA	AA	AA	AA	AA	AA	AA
Gm14_47744620_G_A	Gm14	47065318	--	AA	GG	AA	AA	AA	AA	GG	--	AG	GG	AA	AA	--	GG	GG	--	GG	--	GG	AA	AA	AG	AA	GG	GG	AA	AA	--	AA	AA	AA	GG	AA	AA	GG	GG	AA	GG	AA	GG	GG	GG	GG	GG	GG	AA
Gm14_47895113_G_A	Gm14	47215997	--	AA	--	AA	AA	AA	AA	AG	--	--	AG	AA	AA	AA	--	--	--	GG	AA	AG	AA	AA	AG	AA	AA	AG	AA	AA	AA	AG	AA	AA	AG	AA	AA	--	AG	AA	AG	AA	--	AA	--	AG	--	AG	AA
Gm14_47991114_C_A	Gm14	47308561	AC	AA	CC	AA	AA	AA	AA	CC	AC	AC	CC	AA	AA	AA	AC	CC	AC	CC	AA	CC	AA	AA	--	AA	AA	CC	AA	AA	AA	CC	AA	AA	CC	AA	AA	CC	CC	AA	CC	AA	CC	AA	CC	CC	CC	CC	AA
Gm14_48026115_C_T	Gm14	47343562	TC	TT	CC	TT	TT	TT	TT	CC	TC	--	CC	TT	TT	TT	TC	CC	TC	CC	TT	CC	TT	TT	CC	TT	TT	CC	TT	TT	TT	CC	TT	TT	CC	TT	TT	CC	CC	TT	CC	TT	CC	TT	CC	CC	CC	CC	TT
Gm14_48219705_C_T	Gm14	47538042	TC	CC	TT	CC	CC	CC	CC	TT	TC	--	TT	CC	CC	CC	TC	TT	TC	TT	CC	TT	CC	CC	--	CC	CC	TT	CC	CC	CC	TT	CC	CC	TT	TC	CC	TT	TT	CC	TT	CC	TT	CC	TT	TT	TT	TT	CC
Gm14_48425707_A_G	Gm14	47744626	AG	GG	AA	GG	GG	AA	GG	AA	AG	--	AA	GG	GG	GG	AG	GG	AG	AA	GG	AA	GG	GG	--	AA	GG	AA	GG	GG	GG	AA	GG	AA	AA	AA	AA	AG	AA	GG	AA	GG	AA	GG	AA	AA	AA	AA	GG
Gm14_48467415_C_T	Gm14	47786334	TC	CC	TT	CC	CC	TT	CC	--	TC	--	--	CC	CC	CC	--	CC	--	--	CC	TT	CC	CC	TC	TT	CC	TT	CC	CC	CC	TT	CC	TT	TT	TT	TT	--	TT	CC	TT	CC	--	CC	--	TC	TT	TT	CC
Gm15_511387_T_C	Gm15	511864	--	--	--	--	--	--	--	--	--	--	--	CC	--	--	--	--	--	--	--	--	--	--	--	--	--	--	--	--	--	--	--	--	--	--	--	--	--	--	--	--	--	--	--	--	--	--	--
Gm15_630331_G_A	Gm15	629908	AA	AG	GG	GG	AA	GG	AA	AA	AA	--	GG	AA	GG	AA	AA	AG	AA	GG	AA	GG	GG	AA	AA	AA	AA	AA	GG	AA	AA	AA	GG	AA	AA	GG	AA	AA	AA	GG	GG	AA	AA	AA	GG	AG	GG	AA	AA
Gm15_741627_C_A	Gm15	741109	AA	AC	CC	CC	AA	CC	AA	AA	AA	AC	CC	AA	CC	AA	AA	AC	AA	CC	AA	CC	CC	AA	AA	AA	AA	AA	CC	AA	AA	AA	CC	AA	AA	CC	AA	AA	AA	CC	CC	AA	AA	AA	CC	AC	CC	AA	AA
Gm15_756303_T_C	Gm15	755785	CC	CC	CC	CC	CC	CC	CC	CC	CC	CC	CC	CC	CC	CC	CC	CC	CC	CC	CC	CC	CC	CC	CC	CC	CC	CC	CC	CC	CC	CC	CC	CC	CC	CC	CC	CC	CC	CC	CC	CC	CC	CC	CC	CC	CC	CC	CC
Gm15_872867_T_G	Gm15	872351	GG	GG	GG	GG	GG	GG	GG	GG	GG	GG	GG	GG	GG	GG	GG	GG	GG	GG	GG	GG	GG	GG	GG	GG	GG	GG	GG	GG	GG	GG	GG	GG	GG	GG	GG	GG	GG	GG	GG	GG	GG	GG	GG	GG	GG	GG	GG
Gm15_948412_T_C	Gm15	947896	CC	CC	CC	CC	CC	CC	CC	CC	CC	CC	CC	CC	CC	CC	CC	CC	CC	CC	CC	CC	CC	CC	CC	CC	CC	CC	CC	CC	CC	CC	CC	CC	CC	CC	CC	CC	CC	CC	CC	CC	CC	CC	CC	CC	CC	CC	CC
Gm15_1007132_A_C	Gm15	1006618	CC	CC	CC	CC	CC	CC	CC	CC	CC	CC	CC	CC	CC	CC	CC	CC	CC	CC	CC	CC	CC	CC	CC	CC	CC	CC	CC	CC	CC	CC	CC	CC	CC	CC	CC	CC	CC	CC	CC	CC	CC	CC	CC	CC	CC	CC	CC
Gm15_1842053_G_T	Gm15	1842060	TT	TT	TT	TT	TT	TT	TT	TT	TT	TT	TT	TT	TT	TT	TT	TT	TT	TT	TT	TT	TT	TT	TT	TT	TT	TT	TT	TT	TT	TT	TG	TT	TT	TT	TT	TT	TT	TT	TT	TT	TT	TT	TT	TT	TT	TT	TT
Gm15_1910769_G_A	Gm15	1910780	AA	AA	AA	AG	AA	AG	AA	AA	AA	AA	AG	AA	AG	AA	AA	--	AA	AG	AA	AG	AG	AA	AA	AA	AA	AG	AG	AA	AA	AA	AG	AA	AA	AG	AA	AA	AA	AG	AG	AA	AA	AA	AG	--	AG	AA	AA
Gm15_1969687_A_G	Gm15	1969699	GG	GG	GG	GG	GG	GG	GG	GG	GG	GG	GG	GG	GG	GG	GG	GG	GG	GG	GG	GG	GG	GG	GG	GG	GG	GG	GG	GG	GG	GG	GG	GG	GG	GG	GG	GG	GG	GG	GG	GG	GG	GG	GG	GG	GG	GG	GG
Gm15_2072075_A_G	Gm15	2072091	AA	AA	AA	AA	AA	AA	AA	AA	AA	AA	AA	AA	AA	AA	AA	AA	AA	AA	AA	AA	AA	AA	AA	AA	AA	AA	AA	AA	AA	AA	AG	AA	AA	AA	AA	AA	AA	AA	AA	AA	AA	AA	AA	AA	AA	AA	AA
Gm15_2198097_A_G	Gm15	2198120	GG	GG	GG	GG	GG	GG	GG	GG	GG	GG	GG	GG	GG	GG	GG	GG	GG	GG	GG	GG	GG	GG	GG	GG	GG	GG	GG	GG	GG	GG	GG	GG	GG	GG	GG	GG	GG	GG	GG	GG	GG	GG	GG	GG	GG	GG	GG
Gm15_2781077_T_C	Gm15	2780998	TT	TT	TT	--	TT	CC	TT	TT	TT	TT	CC	CC	CC	TT	TT	TT	TT	--	TT	TT	CC	--	TT	TT	TT	TC	CC	TT	TT	TT	--	TT	TT	CC	TT	TT	TT	CC	--	CC	TT	--	--	--	CC	TT	TT
Gm15_3050845_G_T	Gm15	3050698	GG	GG	GG	TT	GG	TT	GG	GG	GG	GG	TT	TT	TT	GG	GG	GG	GG	TT	GG	GG	TT	TT	GG	GG	GG	TT	TT	GG	GG	GG	TT	GG	GG	TT	GG	GG	GG	TT	--	TT	GG	GG	TT	GG	TT	GG	GG
Gm15_3160423_T_G	Gm15	3169943	--	TG	TT	GG	TT	GG	TT	TG	TT	TT	GG	GG	GG	TT	TT	TT	TT	GG	TG	TT	GG	GG	TT	TT	TT	GG	GG	TT	TG	TT	GG	TT	TT	GG	TT	TT	TT	GG	--	GG	GG	TG	GG	TG	GG	TT	TT
Gm15_3281983_G_A	Gm15	3291460	AA	AG	AA	GG	AA	GG	AA	AG	AA	AA	GG	GG	GG	AA	AA	AA	AA	--	AG	AA	GG	GG	AA	AA	AA	GG	GG	AA	AG	AA	GG	AA	AA	GG	AA	AA	AA	GG	--	GG	AA	AG	GG	AG	GG	AA	AA
Gm15_3845971_T_C	Gm15	3863922	CC	CC	CC	TT	CC	CC	TT	CC	CC	CC	TT	CC	TT	CC	CC	CC	CC	TT	CC	CC	TT	TT	CC	CC	CC	CC	TT	CC	CC	CC	TT	CC	CC	CC	CC	CC	CC	TT	TC	TT	CC	CC	TT	TC	TT	CC	CC
Gm15_4264903_C_T	Gm15	4283809	TT	TT	TT	CC	TT	TT	CC	TT	TT	TT	CC	TT	CC	TT	TT	TT	TT	CC	TT	TT	CC	CC	TT	TT	TT	TT	CC	TT	TT	TT	CC	TT	TT	TT	TT	TT	TT	CC	TC	CC	TT	TT	CC	TC	CC	TT	TT
Gm15_4315169_T_C	Gm15	4334070	TT	TT	TT	CC	TT	TT	CC	TT	TT	TT	CC	TT	CC	TT	TT	TT	TT	CC	TT	TT	CC	CC	TT	TT	TT	TT	CC	TT	TT	TT	CC	TT	TT	TT	TT	TT	TT	CC	TC	CC	TT	TT	CC	TT	CC	TT	TT
Gm15_4406751_T_C	Gm15	4425676	TT	TT	TT	CC	TT	TT	CC	TT	TT	TT	CC	TT	CC	TT	TT	TT	TT	CC	TT	TT	CC	CC	TT	TT	TT	TT	CC	TT	TT	TT	CC	TT	TT	TT	TT	TT	TT	CC	TC	CC	TT	TT	CC	TT	CC	TT	TT
Gm15_4456903_G_A	Gm15	4475844	GG	GG	GG	AA	GG	AA	AA	GG	GG	GG	AA	AA	AA	GG	GG	GG	GG	AA	GG	GG	AA	AA	GG	GG	GG	AA	AA	GG	GG	GG	AA	GG	GG	AA	GG	GG	GG	AA	AG	AA	GG	GG	AA	GG	AA	GG	GG
Gm15_4522374_C_A	Gm15	4541338	CC	CC	CC	AA	CC	AA	AA	CC	CC	CC	AA	AA	AA	CC	CC	CC	CC	AA	CC	CC	AA	AA	CC	CC	CC	AA	AA	CC	CC	CC	AA	CC	CC	AA	CC	CC	CC	AA	AC	AA	CC	CC	AA	CC	AA	CC	CC
Gm15_4751337_G_A	Gm15	4770814	GG	GG	GG	GG	GG	GG	GG	GG	GG	GG	GG	GG	GG	GG	GG	GG	GG	GG	GG	GG	GG	GG	GG	GG	GG	GG	GG	GG	GG	GG	GG	GG	GG	GG	GG	GG	GG	GG	GG	GG	GG	GG	GG	GG	GG	GG	GG
Gm15_4911708_G_T	Gm15	4931211	GG	GG	GG	GG	GG	GG	GG	GG	GG	GG	GG	GG	GG	GG	GG	GG	GG	GG	GG	GG	GG	GG	GG	GG	GG	GG	GG	GG	GG	GG	GG	GG	GG	GG	GG	GG	GG	GG	GG	GG	GG	GG	GG	GG	GG	GG	GG
Gm15_4973977_T_C	Gm15	4991877	TT	TT	TT	TT	TT	TT	TT	TT	TT	TT	TT	TT	TT	TT	TT	TT	TT	TT	TT	TT	TT	TT	TT	TT	TT	TT	TT	TT	TT	TT	TT	TT	TT	TT	TT	TT	TT	TT	TT	TT	TT	TT	TT	TT	TT	TT	TT
Gm15_5203685_C_T	Gm15	5222329	TT	TT	TT	TT	TT	TT	TT	TT	TT	TT	TT	TT	TT	TT	TT	TT	TT	TT	TT	TT	TT	TT	TT	TT	TT	TT	TT	TT	TT	TT	TT	TT	TT	TT	TT	TT	TT	TT	TT	TT	TT	TT	TT	TT	TT	TT	TT
Gm15_5312718_C_T	Gm15	5331364	--	TC	TT	CC	TT	CC	CC	TC	TT	--	CC	--	CC	TT	TT	TT	TT	CC	TT	TT	CC	--	TC	TT	TT	CC	CC	CC	TT	TT	CC	TT	TT	CC	TT	TT	TT	CC	--	CC	TC	TC	CC	TC	CC	TT	CC
Gm15_5522858_T_C	Gm15	5541487	--	CC	CC	TC	CC	TC	--	CC	CC	CC	TC	TC	TC	CC	CC	CC	CC	TC	CC	CC	--	--	--	CC	CC	--	TC	--	CC	TC	--	CC	CC	--	CC	CC	CC	TC	--	TC	CC	CC	TC	CC	TC	CC	TC
Gm15_5638918_T_G	Gm15	5657544	--	TG	GG	TT	GG	TT	TT	TG	GG	TG	TT	TG	TT	GG	GG	GG	GG	TT	GG	GG	TT	--	TT	GG	GG	--	TT	TT	GG	TT	TT	GG	GG	TT	GG	GG	GG	TT	--	TT	TG	TG	TT	TG	TT	GG	TT
Gm15_5897409_G_A	Gm15	5916445	GG	GG	GG	GG	GG	GG	GG	GG	GG	GG	GG	GG	GG	GG	GG	GG	GG	GG	GG	GG	GG	GG	GG	GG	GG	GG	GG	GG	GG	GG	GG	GG	GG	GG	GG	GG	GG	GG	GG	GG	GG	GG	GG	GG	GG	GG	GG
Gm15_5924951_A_G	Gm15	5943987	AA	AA	AA	AA	AA	AA	AA	AA	AA	AA	AA	AA	AA	AA	AA	AA	AA	AA	AA	AA	AA	AA	AA	AA	AA	AA	AA	AA	AA	AA	AA	AA	AA	AA	AA	AA	AA	AA	AA	AA	AA	AA	AA	AA	AA	AA	AA
Gm15_6047557_T_C	Gm15	6066642	CC	CC	CC	CC	CC	CC	CC	CC	CC	CC	CC	CC	CC	CC	CC	CC	CC	CC	CC	CC	CC	CC	CC	CC	CC	CC	CC	CC	CC	CC	CC	CC	CC	CC	CC	CC	CC	CC	CC	CC	CC	CC	CC	CC	CC	CC	CC
Gm15_6066709_C_A	Gm15	6085794	AA	AA	AA	AA	AA	AA	AA	AA	AA	AA	AA	AA	AA	AA	AA	AA	AA	AA	AA	AA	AA	AA	AA	AA	AA	AA	AA	AA	AA	AA	--	AA	AA	AA	AA	AA	AA	AA	AA	AA	AA	AA	AA	AA	AA	AA	AA
Gm15_6272006_T_C	Gm15	6291081	CC	CC	CC	CC	CC	CC	CC	CC	CC	CC	CC	CC	CC	CC	CC	CC	CC	CC	CC	CC	CC	CC	CC	CC	CC	CC	CC	CC	CC	CC	CC	CC	CC	CC	CC	CC	CC	CC	CC	CC	CC	CC	CC	CC	CC	CC	CC
Gm15_6674572_A_C	Gm15	6693850	CC	CC	CC	CC	CC	CC	CC	CC	CC	CC	CC	CC	CC	CC	CC	CC	CC	CC	CC	CC	CC	CC	CC	CC	CC	CC	CC	CC	CC	CC	CC	CC	CC	CC	CC	CC	CC	CC	CC	CC	CC	CC	CC	CC	CC	CC	CC
Gm15_6772445_G_A	Gm15	6790840	GG	--	--	GG	AA	GG	GG	--	AA	GG	GG	AG	GG	AA	AA	AA	AA	GG	GG	AA	AA	AA	--	AA	AA	GG	GG	AA	--	GG	--	AA	AA	GG	AA	AA	GG	GG	--	GG	GG	GG	GG	AG	GG	GG	GG
Gm15_6823009_G_T	Gm15	6841404	TT	TT	TT	TT	TT	TT	TT	TT	TT	TT	TT	TT	TT	TT	TT	TT	TT	TT	TT	TT	TT	TT	TT	TT	TT	TT	TT	TT	TT	TT	TT	TT	TT	TT	TT	TT	TT	TT	TT	TT	TT	TT	TT	TT	TT	TT	TT
Gm15_7080649_A_C	Gm15	7094505	CC	CC	CC	CC	CC	CC	CC	CC	CC	CC	CC	CC	CC	CC	CC	CC	CC	CC	CC	CC	CC	CC	CC	CC	CC	CC	CC	CC	CC	CC	CC	CC	CC	CC	CC	CC	CC	CC	CC	CC	CC	CC	CC	CC	CC	CC	CC
Gm15_7147226_G_A	Gm15	7161083	AA	GG	GG	AA	GG	AA	AA	GG	GG	AA	AA	AG	AA	GG	GG	GG	GG	AA	AA	GG	GG	GG	--	GG	GG	AA	AA	GG	GG	AA	AA	GG	GG	AA	GG	GG	AA	AA	AG	AA	AA	AA	AA	GG	AA	AA	AA
Gm15_7343866_C_T	Gm15	7358153	TT	CC	CC	TT	CC	TT	TT	CC	CC	TT	TT	--	TT	CC	CC	CC	CC	TT	TT	CC	CC	CC	TT	CC	CC	TT	CC	CC	CC	TT	TT	CC	CC	TT	CC	CC	TT	TT	TC	TT	TT	TT	TT	CC	TT	TT	TT
Gm15_7574118_T_C	Gm15	7598331	CC	CC	CC	CC	CC	CC	CC	CC	CC	CC	CC	CC	CC	CC	CC	CC	CC	CC	CC	CC	CC	CC	CC	CC	CC	CC	CC	CC	CC	CC	--	CC	CC	CC	CC	CC	CC	CC	CC	CC	CC	CC	CC	CC	CC	CC	CC
Gm15_7637174_A_C	Gm15	7661406	CC	CC	CC	CC	CC	CC	CC	CC	CC	CC	CC	CC	CC	CC	CC	CC	CC	CC	CC	CC	CC	CC	CC	CC	CC	CC	CC	CC	CC	CC	CC	CC	CC	CC	CC	CC	CC	CC	CC	CC	CC	CC	CC	CC	CC	CC	CC
Gm15_7829610_A_G	Gm15	7853665	AA	AG	AG	AA	GG	AA	AA	--	GG	AA	AA	AG	AA	AA	GG	GG	GG	AA	AA	GG	GG	GG	--	GG	GG	AA	GG	GG	GG	AA	--	GG	GG	AA	GG	GG	AA	AA	--	AA	AA	AA	AA	AG	AA	AA	AA
Gm15_8134735_A_G	Gm15	8166820	GG	AG	AG	GG	AA	GG	GG	--	--	GG	GG	AG	GG	GG	AA	AA	AA	GG	GG	AA	AA	AA	--	AA	AA	GG	AA	AA	AG	GG	GG	AA	AA	GG	AA	AA	GG	GG	--	GG	GG	GG	GG	AG	GG	GG	GG
Gm15_8263547_G_T	Gm15	8304621	TT	--	--	TT	GG	TT	TT	--	GG	TT	TT	--	TT	TT	GG	GG	GG	TT	TT	GG	GG	GG	--	GG	GG	TT	GG	GG	GG	TT	TG	GG	GG	GG	GG	GG	TT	TT	--	TT	TT	TT	TT	TG	TT	TT	TT
Gm15_8412363_G_A	Gm15	8453325	AA	GG	GG	AA	GG	AA	AA	GG	GG	AA	AA	--	AA	AA	GG	GG	GG	AA	AA	GG	GG	GG	--	GG	GG	AA	GG	GG	GG	AG	GG	GG	GG	GG	GG	GG	AA	AA	AG	AA	AA	AA	AA	GG	AA	AA	AA
Gm15_8579398_C_T	Gm15	8620771	TT	CC	CC	TT	CC	TT	TT	CC	CC	TT	TT	--	TT	TT	CC	CC	CC	TT	TT	CC	CC	CC	TT	CC	CC	TT	CC	CC	CC	TC	CC	CC	CC	CC	CC	CC	TT	TT	TC	TT	TT	TT	TT	CC	TT	TT	TT
Gm15_8697425_C_A	Gm15	8740226	AA	--	CC	AA	CC	AA	--	CC	CC	--	AA	--	AA	AA	CC	CC	CC	AA	AA	CC	CC	CC	AC	CC	CC	AA	CC	CC	CC	--	CC	CC	CC	CC	CC	CC	AA	AA	--	AA	AA	AA	--	CC	AA	AA	AA
Gm15_8715603_A_G	Gm15	8758404	GG	AG	AA	GG	AA	GG	GG	AA	AA	GG	GG	--	GG	GG	AA	AA	AA	GG	GG	AA	AA	AA	--	AA	AA	GG	AA	AA	AA	--	AA	AA	AA	AA	AA	AA	GG	GG	AG	GG	GG	GG	GG	--	GG	GG	GG
Gm15_8815027_T_C	Gm15	8857984	TT	TT	TT	TT	TT	TT	TT	TT	TT	TT	TT	TT	TT	TT	TT	TT	TT	TT	TT	TT	TT	TT	TT	TT	TT	TT	TT	TT	TT	TT	TT	TT	TT	TT	TT	TT	TT	TT	TT	TT	TT	TT	TT	TT	TT	TT	TT
Gm15_8934427_C_T	Gm15	8976489	TT	CC	CC	TT	CC	TT	TT	CC	CC	TT	TT	--	TT	TT	CC	CC	CC	TT	TT	CC	CC	CC	TC	CC	CC	TT	CC	CC	CC	TC	CC	CC	CC	CC	CC	CC	TT	TT	TC	TT	TT	TT	TT	CC	TT	TT	TT
Gm15_9058303_T_C	Gm15	9100367	CC	TT	CC	CC	TT	CC	CC	TT	TT	CC	CC	--	TT	CC	TT	TT	CC	CC	CC	TT	TT	TT	--	TT	TT	CC	TT	TT	TT	TC	TT	TT	TT	TT	TT	TT	CC	CC	TC	CC	CC	CC	CC	TT	CC	CC	CC
Gm15_9164446_A_G	Gm15	9205168	GG	AG	GG	GG	AA	GG	GG	AG	--	GG	GG	AA	AA	GG	AA	AA	GG	GG	GG	AA	AA	AA	--	AA	AA	GG	AA	AA	AA	--	AG	AA	AA	AA	AA	AA	GG	GG	--	GG	GG	GG	GG	AG	GG	GG	GG
Gm15_10416352_C_T	Gm15	9383632	TT	CC	TT	TT	CC	TT	TT	CC	CC	TT	TT	CC	CC	TT	CC	CC	TT	TT	TT	CC	CC	CC	TC	CC	CC	TT	CC	CC	CC	--	CC	CC	CC	CC	CC	CC	TT	TT	TC	TT	TT	TT	TT	CC	TT	TT	TT
Gm15_9413370_G_A	Gm15	9557248	GG	GG	GG	GG	GG	GG	GG	GG	GG	GG	GG	GG	GG	GG	GG	GG	GG	GG	GG	GG	GG	GG	GG	GG	GG	GG	GG	GG	GG	GG	GG	GG	GG	GG	GG	GG	GG	GG	GG	GG	GG	GG	GG	GG	GG	GG	GG
Gm15_9520804_G_A	Gm15	9665525	GG	GG	GG	GG	GG	GG	GG	GG	GG	GG	GG	GG	GG	GG	GG	GG	GG	GG	GG	GG	GG	GG	GG	GG	GG	GG	GG	GG	GG	GG	--	GG	GG	GG	GG	GG	GG	GG	GG	GG	GG	GG	GG	GG	GG	GG	GG
Gm15_9594410_T_C	Gm15	9748128	TT	TT	TT	TT	TT	TT	TT	TT	TT	TT	TT	TT	TT	TT	TT	TT	TT	TT	TT	TT	TT	TT	TT	TT	TT	TT	TT	TT	TT	TT	TC	TT	TT	TT	TT	TT	TT	TT	TT	TT	TT	TT	TT	TT	TT	TT	TT
Gm15_9733870_T_C	Gm15	9887588	TT	TT	TT	TT	TT	TT	TT	TT	TT	TT	TT	TT	TT	TT	TT	TT	TT	TT	TT	TT	TT	TT	TT	TT	TT	TT	TT	TT	TT	TT	TC	TT	TT	TT	TT	TT	TT	TT	TT	TT	TT	TT	TT	TT	TT	TT	TT
Gm15_9948537_G_A	Gm15	10102255	GG	GG	GG	GG	GG	GG	GG	GG	GG	GG	GG	GG	GG	GG	GG	GG	GG	GG	GG	GG	GG	GG	GG	GG	GG	GG	GG	GG	GG	GG	GG	GG	GG	GG	GG	GG	GG	GG	GG	GG	GG	GG	GG	GG	GG	GG	GG
Gm15_10008869_G_T	Gm15	10162587	GG	GG	GG	GG	GG	GG	GG	GG	GG	GG	GG	GG	GG	GG	GG	GG	GG	GG	GG	GG	GG	GG	GG	GG	GG	GG	GG	GG	GG	GG	GG	GG	GG	GG	GG	GG	GG	GG	GG	GG	GG	GG	GG	GG	GG	GG	GG
Gm15_10059948_T_C	Gm15	10213666	TT	TT	TT	TT	TT	TT	TT	TT	TT	TT	TT	TT	TT	TT	TT	TT	TT	TT	TT	TT	TT	TT	TT	TT	TT	TT	TT	TT	TT	TT	TT	TT	TT	TT	TT	TT	TT	TT	TT	TT	TT	TT	TT	TT	TT	TT	TT
Gm15_10129096_A_C	Gm15	10282830	AA	AA	AA	AA	AA	AA	AA	AA	AA	AA	AA	AA	AA	AA	AA	AA	AA	AA	AA	AA	AA	AA	AA	AA	AA	AA	AA	AA	AA	AA	AA	AA	AA	AA	AA	AA	AA	AA	AA	AA	AA	AA	AA	AA	AA	AA	AA
Gm15_11172677_A_G	Gm15	11195784	AA	GG	AA	GG	GG	AA	AA	AA	GG	AA	AG	GG	GG	AA	GG	GG	AA	AA	GG	GG	GG	GG	AA	GG	AA	GG	GG	AA	GG	GG	GG	GG	GG	AA	GG	GG	AA	AA	AG	AA	GG	AA	AA	GG	AA	AA	AA
Gm15_11192460_G_A	Gm15	11215567	--	--	GG	AA	AA	GG	GG	GG	--	GG	AG	AA	AA	GG	AA	AA	GG	GG	--	AA	AA	AA	--	AA	GG	AA	AA	GG	AA	AA	--	AA	AA	GG	AA	AA	GG	GG	AG	GG	AA	GG	GG	AG	GG	GG	GG
Gm15_11257759_T_C	Gm15	11280882	TT	CC	TT	CC	CC	TT	TT	TT	CC	TT	TC	CC	CC	TT	CC	CC	TT	TT	CC	CC	CC	CC	TT	CC	TT	CC	CC	TT	CC	CC	CC	CC	CC	TT	CC	CC	TT	TT	TC	TT	CC	TT	TT	CC	TT	TT	TT
Gm15_11551488_T_C	Gm15	11571783	TT	TT	CC	TT	TT	CC	CC	CC	TT	CC	TC	TT	TT	CC	TT	TT	CC	CC	TT	TT	TT	TT	CC	TT	CC	TT	TT	CC	TT	TT	TT	TT	TT	CC	TT	TT	CC	CC	TC	TT	TT	CC	CC	TT	CC	CC	CC
Gm15_11712082_A_G	Gm15	11732152	AA	AA	GG	AA	AA	GG	GG	GG	AA	AA	AG	AA	AA	GG	AA	AA	GG	GG	AA	AA	AA	AA	GG	AA	GG	AA	AA	GG	AA	AA	AA	AA	AA	GG	AA	AA	GG	GG	--	AA	AA	GG	GG	AA	GG	GG	AA
Gm15_11855585_C_T	Gm15	11875647	TT	TT	TT	TT	TT	TT	TT	TT	TT	TT	TT	TT	TT	TT	TT	TT	TT	TT	TT	TT	TT	TT	TT	TT	TT	TT	TT	TT	TT	TT	TC	TT	TT	TT	TT	TT	TT	TT	TT	TT	TT	TT	TT	TT	TT	TT	TT
Gm15_12475289_T_C	Gm15	12496431	CC	TC	--	CC	CC	TT	TT	TT	CC	CC	--	CC	CC	TT	CC	CC	TT	--	CC	CC	CC	CC	--	CC	TT	CC	CC	TT	CC	CC	CC	CC	CC	TT	CC	CC	TT	TT	CC	CC	CC	TT	TT	--	TT	TT	CC
Gm15_12531884_A_G	Gm15	12553029	GG	AA	AA	GG	GG	AA	AA	AA	GG	GG	AG	GG	GG	AA	GG	GG	AA	AA	GG	GG	GG	GG	AG	GG	AA	GG	GG	AA	GG	GG	GG	GG	GG	AA	GG	GG	AA	AA	GG	GG	GG	AA	AA	GG	AA	AA	GG
Gm15_12611331_A_G	Gm15	12632475	AA	AA	AA	AA	AA	AA	AA	AA	AA	AA	AA	AA	AA	AA	AA	AA	AA	AA	AA	AA	AA	AA	AA	AA	AA	AA	AA	AA	AA	AA	AA	AA	AA	AA	AA	AA	AA	AA	AA	AA	AA	AA	AA	AA	AA	AA	AA
Gm15_12643435_T_C	Gm15	12664579	CC	TT	TT	CC	CC	TT	TT	TT	CC	CC	TC	CC	CC	TT	CC	CC	TT	TT	CC	CC	CC	CC	TC	CC	TT	CC	CC	TT	CC	CC	CC	CC	CC	TT	CC	CC	TT	TT	CC	CC	CC	TT	TT	CC	TT	TT	CC
Gm15_13180039_C_T	Gm15	13198878	TT	TT	TT	TT	TT	TT	TT	TT	TT	TT	TT	TT	TT	TT	TT	TT	TT	TT	TT	TT	TT	TT	TT	TT	TT	TT	TT	TT	TT	TT	TT	TT	TT	TT	TT	TT	TT	TT	TT	TT	TT	TT	TT	TT	TT	TT	TT
Gm15_13427310_G_T	Gm15	13440994	TT	TT	TT	TT	TT	TT	TT	TT	TT	TT	TT	TT	TT	TT	TT	TT	TT	TT	TT	TT	TT	TT	TT	TT	TT	TT	TT	TT	TT	TT	TT	TT	TT	TT	TT	TT	TT	TT	TT	TT	TT	TT	TT	TT	TT	TT	TT
Gm15_13801080_T_C	Gm15	13816717	CC	CC	CC	CC	CC	CC	CC	CC	CC	CC	CC	CC	CC	CC	CC	CC	CC	CC	CC	CC	CC	CC	CC	CC	CC	CC	CC	CC	CC	CC	CC	CC	CC	CC	CC	CC	CC	CC	CC	CC	CC	CC	CC	CC	CC	CC	CC
Gm15_13828058_G_T	Gm15	13843695	TT	TT	TT	TT	TT	TT	TT	TT	TT	TT	TT	TT	TT	TT	TT	TT	TT	TT	TT	TT	TT	TT	TT	TT	TT	TT	TT	TT	TT	TT	TG	TT	TT	TT	TT	TT	TT	TT	TT	TT	TT	TT	TT	TT	TT	TT	TT
Gm15_14146264_T_C	Gm15	14162257	CC	CC	CC	CC	CC	CC	CC	CC	CC	CC	CC	CC	CC	CC	CC	CC	CC	CC	CC	CC	CC	CC	CC	CC	CC	CC	CC	CC	CC	CC	--	CC	CC	CC	CC	CC	CC	CC	CC	CC	CC	CC	CC	CC	CC	CC	CC
Gm15_14201752_T_C	Gm15	14217678	CC	CC	CC	CC	CC	CC	CC	CC	CC	CC	CC	CC	CC	CC	CC	CC	CC	CC	CC	CC	CC	CC	CC	CC	CC	CC	CC	CC	CC	CC	--	CC	CC	CC	CC	CC	CC	CC	CC	CC	CC	CC	CC	CC	CC	CC	CC
Gm15_14243520_C_A	Gm15	14259458	AA	AA	AA	AA	AA	AA	AA	AA	AA	AA	AA	AA	AA	AA	AA	AA	AA	AA	AA	AA	AA	AA	AA	AA	AA	AA	AA	AA	AA	AA	AC	AA	AA	AA	AA	AA	AA	AA	AA	AA	AA	AA	AA	AA	AA	AA	AA
Gm15_14329774_G_A	Gm15	14345712	AA	AA	AA	AA	AA	AA	AA	AA	AA	AA	AA	AA	AA	AA	AA	AA	AA	AA	AA	AA	AA	AA	AA	AA	AA	AA	AA	AA	AA	AA	AA	AA	AA	AA	AA	AA	AA	AA	AA	AA	AA	AA	AA	AA	AA	AA	AA
Gm15_14361475_T_C	Gm15	14377413	CC	CC	CC	CC	CC	CC	CC	CC	CC	CC	CC	CC	CC	CC	CC	CC	CC	CC	CC	CC	CC	CC	CC	CC	CC	CC	CC	CC	CC	CC	CC	CC	CC	CC	CC	CC	CC	CC	CC	CC	CC	CC	CC	CC	CC	CC	CC
Gm15_14539028_A_C	Gm15	14555069	CC	CC	CC	CC	CC	CC	CC	CC	CC	CC	CC	CC	CC	CC	CC	CC	CC	CC	CC	CC	CC	CC	CC	CC	CC	CC	CC	CC	CC	CC	CC	CC	CC	CC	CC	CC	CC	CC	CC	CC	CC	CC	CC	CC	CC	CC	CC
Gm15_14548441_T_C	Gm15	14564511	CC	CC	CC	CC	CC	CC	CC	CC	CC	CC	CC	CC	CC	CC	CC	CC	CC	CC	CC	CC	CC	CC	CC	CC	CC	CC	CC	CC	CC	CC	--	CC	CC	CC	CC	CC	CC	CC	CC	CC	CC	CC	CC	CC	CC	CC	CC
Gm15_14642145_G_A	Gm15	14667375	AA	--	GG	AA	GG	GG	AA	GG	AA	AA	--	GG	AA	GG	AA	AA	GG	GG	--	AA	AA	GG	--	--	GG	AA	AA	AA	AA	AA	AG	AA	AA	GG	AA	AA	AA	AA	AA	AA	GG	GG	GG	AG	GG	AA	AA
Gm15_14712034_G_T	Gm15	14737273	--	--	GG	TT	GG	GG	TT	GG	--	TT	--	--	TT	GG	TT	TT	GG	--	TG	TT	TT	GG	--	--	GG	TT	TT	TT	TT	TT	TG	TT	TT	GG	TT	TT	TT	TT	--	TT	GG	GG	GG	TG	GG	TT	TT
Gm15_14780339_A_G	Gm15	14805828	GG	GG	GG	GG	GG	GG	GG	GG	GG	GG	GG	GG	GG	GG	GG	GG	GG	GG	GG	GG	GG	GG	GG	GG	GG	GG	GG	GG	GG	GG	GG	GG	GG	GG	GG	GG	GG	GG	GG	GG	GG	GG	GG	GG	GG	GG	GG
Gm15_14850682_C_A	Gm15	14876073	AA	AC	AC	AA	CC	AC	AA	CC	AA	AA	AA	AC	AA	CC	AA	AA	CC	AC	AA	AA	AA	AC	--	AA	CC	AA	AA	AA	AA	AA	AA	AA	AA	CC	AA	AA	AA	AA	AA	AA	CC	--	AC	AA	CC	AA	AA
Gm15_15001782_A_G	Gm15	15026597	GG	AG	AA	GG	AA	AA	GG	AA	GG	GG	GG	AA	GG	AA	GG	GG	AA	AA	GG	GG	GG	AA	--	GG	AA	GG	GG	GG	GG	GG	GG	GG	GG	AA	GG	GG	GG	GG	GG	GG	AA	AA	AA	--	AA	GG	GG
Gm15_15178159_T_C	Gm15	15203972	CC	CC	CC	CC	CC	CC	CC	CC	CC	CC	CC	CC	CC	CC	CC	CC	CC	CC	CC	CC	CC	CC	CC	CC	CC	CC	CC	CC	CC	CC	CC	CC	CC	CC	CC	CC	CC	CC	CC	CC	CC	CC	CC	CC	CC	CC	CC
Gm15_15220762_A_G	Gm15	15246573	GG	GG	GG	GG	GG	GG	GG	GG	GG	GG	GG	GG	GG	GG	GG	GG	GG	GG	GG	GG	GG	GG	GG	GG	GG	GG	GG	GG	GG	GG	GG	GG	GG	GG	GG	GG	GG	GG	GG	GG	GG	GG	GG	GG	GG	GG	GG
Gm15_15511644_A_G	Gm15	15537239	AA	AG	GG	AA	GG	GG	AA	GG	AA	AA	AA	GG	AA	GG	AA	AA	GG	GG	AA	AA	AA	GG	--	AA	GG	AA	AA	AA	AA	AA	AA	AA	AA	GG	AA	AA	AA	AA	AA	AA	GG	GG	GG	--	GG	AA	AA
Gm15_15638272_G_A	Gm15	15663774	GG	AG	AA	GG	AA	AA	GG	AA	GG	GG	GG	--	GG	AA	GG	GG	AA	AA	GG	GG	GG	AA	GG	GG	AA	GG	GG	GG	GG	GG	GG	GG	GG	AA	GG	GG	GG	GG	GG	GG	AA	AA	AA	--	AA	GG	GG
Gm15_15746095_G_A	Gm15	15771590	GG	--	AA	GG	AA	--	GG	AA	GG	GG	GG	AG	GG	AA	GG	GG	AA	--	GG	GG	GG	AA	--	GG	AA	GG	GG	GG	GG	GG	--	GG	GG	AA	GG	GG	GG	GG	GG	GG	AA	AA	AA	AG	AA	GG	GG
Gm15_15896387_C_T	Gm15	15923817	CC	TC	TC	CC	TT	TC	CC	TT	CC	CC	CC	TC	CC	TT	CC	TC	TT	TC	CC	CC	CC	--	--	CC	TT	CC	CC	CC	CC	CC	TC	CC	CC	TT	TC	CC	CC	CC	CC	CC	TT	--	--	--	TT	CC	CC
Gm15_15952535_C_A	Gm15	15979942	CC	AC	--	CC	AA	AC	CC	AA	CC	CC	CC	AA	CC	AA	CC	--	AA	--	CC	CC	CC	--	--	CC	AA	CC	CC	CC	CC	CC	AC	CC	CC	AA	--	CC	CC	CC	CC	CC	AA	--	--	--	AA	CC	CC
Gm15_43797502_G_T	Gm15	44556639	GG	GG	GG	GG	GG	GG	GG	GG	GG	GG	GG	GG	GG	GG	GG	GG	GG	GG	GG	GG	GG	GG	GG	GG	GG	GG	GG	GG	GG	GG	--	GG	GG	GG	GG	GG	GG	GG	GG	GG	GG	GG	GG	GG	GG	GG	GG
Gm15_44059851_T_C	Gm15	44819032	TT	TT	TT	TT	TT	TT	TT	TT	TT	TT	TT	TT	TT	TT	TT	TT	TT	TT	TT	TT	TT	TT	TT	TT	TT	TT	TT	TT	TT	TT	--	TT	TT	TT	TT	TT	TT	TT	TT	TT	TT	TT	TT	TT	TT	TT	TT
Gm15_47255820_T_C	Gm15	48046189	TT	TT	TT	TT	TT	TT	TT	TT	TT	TT	TT	TT	TT	TT	TT	TT	TT	TT	TT	TT	TT	TT	TT	TT	TT	TT	TT	TT	TT	TT	TT	TT	TT	TT	TT	TT	TT	TT	TT	TT	TT	TT	TT	TT	TT	TT	TT
Gm15_47679988_T_C	Gm15	48472662	TT	TT	TT	TT	TT	TT	TT	TT	TT	TT	TT	TT	TT	TT	TT	TT	TT	TT	TT	TT	TT	TT	TT	TT	TT	TT	TT	TT	TT	TT	TT	TT	TT	TT	TT	TT	TT	TT	TT	TT	TT	TT	TT	TT	TT	TT	TT
Gm15_47744421_G_A	Gm15	48537095	GG	GG	GG	GG	GG	GG	GG	GG	GG	GG	GG	GG	GG	GG	GG	GG	GG	GG	GG	GG	GG	GG	GG	GG	GG	GG	GG	GG	GG	GG	GG	GG	GG	GG	GG	GG	GG	GG	GG	GG	GG	GG	GG	GG	GG	GG	GG
Gm15_47871831_A_C	Gm15	48664536	CC	CC	CC	CC	CC	CC	CC	CC	CC	CC	CC	CC	CC	CC	CC	CC	CC	CC	CC	CC	CC	CC	CC	CC	CC	CC	CC	CC	CC	CC	CC	CC	CC	CC	CC	CC	CC	CC	CC	CC	CC	CC	CC	CC	CC	CC	CC
Gm15_47984642_G_A	Gm15	48778238	AA	AA	AA	AA	AA	AA	AA	AA	AA	AA	AA	AA	AA	AA	AA	AA	AA	AA	AA	AA	AA	AA	AA	AA	AA	AA	AA	AA	AA	AA	AA	AA	AA	AA	AA	AA	AA	AA	AA	AA	AA	AA	AA	AA	AA	AA	AA
Gm15_48061981_C_T	Gm15	48855521	TT	TC	CC	TT	TT	TT	TT	CC	CC	TT	TT	TT	TT	TT	--	TT	TT	TC	CC	CC	CC	CC	CC	TT	CC	CC	CC	CC	TC	CC	TT	TT	CC	CC	TT	TC	CC	TT	TT	CC	TT	TT	TT	--	TT	CC	TT
Gm15_48117938_G_A	Gm15	48911478	GG	AG	AA	GG	GG	GG	GG	AA	AA	GG	GG	GG	GG	GG	--	GG	GG	AG	AA	AA	AA	AA	AA	GG	AA	AA	AA	AA	AG	AA	GG	GG	AA	AA	GG	AG	AA	GG	GG	AA	GG	GG	GG	--	GG	AA	GG
Gm15_48259512_T_C	Gm15	49053056	TT	TC	CC	TT	TT	TC	TT	CC	CC	--	TT	TT	TT	CC	CC	TT	TT	--	CC	CC	CC	CC	CC	--	CC	CC	CC	CC	TC	CC	--	TT	CC	CC	TT	--	CC	TT	TT	CC	TT	CC	--	--	TT	CC	TT
Gm15_48653554_A_C	Gm15	49446994	CC	CC	CC	CC	CC	CC	CC	CC	CC	CC	CC	CC	CC	CC	CC	CC	CC	CC	CC	CC	CC	CC	CC	CC	CC	CC	CC	CC	CC	CC	CC	CC	CC	CC	CC	CC	CC	CC	CC	CC	CC	CC	CC	--	CC	CC	CC
Gm15_48802538_C_A	Gm15	49595974	CC	CC	CC	CC	CC	CC	CC	CC	CC	CC	CC	CC	CC	CC	CC	CC	CC	CC	CC	CC	CC	CC	CC	CC	CC	CC	CC	CC	CC	CC	CC	CC	CC	CC	CC	CC	CC	CC	CC	CC	CC	CC	CC	CC	CC	CC	CC
Gm15_48971950_T_C	Gm15	49765244	TT	TT	TT	TT	TT	TT	TT	TT	TT	TT	TT	TT	TT	TT	TT	TT	TT	TT	TT	TT	TT	TT	TT	TT	TT	TT	TT	TT	TT	TT	TT	TT	TT	TT	TT	TT	TT	TT	TT	TT	TT	TT	TT	TT	TT	TT	TT
Gm15_49023306_T_G	Gm15	49816600	TT	TT	TT	TT	TT	TT	TT	TT	TT	TT	TT	TT	TT	TT	TT	TT	TT	TT	TT	TT	TT	TT	TG	TT	TT	TT	TT	TT	TT	TT	TG	TT	TT	TT	TT	TT	TT	TT	TT	TT	TT	TT	TT	--	TT	TT	TT
Gm15_49088291_T_C	Gm15	49881585	TT	TT	TT	TT	TT	TT	TT	TT	TT	TT	TT	TT	TT	TT	TT	TT	TT	TT	TT	TT	TT	TT	TT	TT	TT	TT	TT	TT	TT	TT	TT	TT	TT	TT	TT	TT	TT	TT	TT	TT	TT	TT	TT	--	TT	TT	TT
Gm15_49226394_G_A	Gm15	50019688	GG	GG	GG	GG	GG	GG	GG	GG	GG	GG	GG	GG	GG	GG	GG	GG	GG	GG	GG	GG	GG	GG	GG	GG	GG	GG	GG	GG	GG	GG	GG	GG	GG	GG	GG	GG	GG	GG	GG	GG	GG	GG	GG	--	GG	GG	GG
Gm15_49318218_A_G	Gm15	50111513	AA	GG	GG	AA	AA	GG	AA	GG	GG	AA	AA	AA	AA	GG	GG	AA	GG	GG	GG	AA	GG	GG	GG	AA	GG	GG	GG	GG	--	GG	AA	AA	GG	GG	AA	AG	GG	AA	AA	GG	AA	GG	AA	AG	AA	GG	AA
Gm15_49401353_T_G	Gm15	50194648	GG	TT	TT	GG	GG	TT	GG	TT	TT	GG	GG	GG	GG	TT	TT	GG	TT	TT	TT	GG	TT	TT	TT	GG	TT	TT	TT	TT	--	TT	GG	GG	TT	TT	GG	TG	TT	GG	GG	TT	GG	TT	GG	TG	GG	TT	GG
Gm15_49458992_C_A	Gm15	50252306	AA	CC	CC	AA	AA	CC	AA	CC	CC	--	AA	AA	AA	CC	CC	AA	CC	CC	CC	AA	CC	CC	CC	AA	CC	CC	CC	CC	AC	CC	AA	AA	CC	CC	AA	AC	CC	AA	AA	CC	AA	CC	AA	--	AA	CC	AA
Gm15_49543373_C_T	Gm15	50342088	TT	CC	--	TT	TT	TC	TT	CC	CC	TT	TT	TT	TT	CC	CC	TT	CC	CC	CC	TT	CC	CC	CC	TT	CC	CC	CC	CC	--	CC	TT	TT	CC	CC	TT	--	CC	TT	TT	CC	TT	CC	TT	--	TT	CC	TT
Gm15_49612939_A_G	Gm15	50411654	AA	AA	AA	AA	AA	AA	AA	AA	AA	AA	AA	AA	AA	AA	AA	AA	AA	AA	AA	AA	AA	AA	AA	AA	AA	AA	AA	AA	AA	AA	AA	AA	AA	AA	AA	AA	AA	AA	AA	AA	AA	AA	AA	AA	AA	AA	AA
Gm15_50626980_T_C	Gm15	51424187	TT	CC	TC	TT	TT	TC	TT	CC	CC	TT	TT	TT	TT	CC	CC	TT	CC	TC	TT	TT	TT	CC	--	TT	CC	CC	CC	TT	--	CC	TT	TT	CC	CC	TT	--	TT	TT	TT	CC	TT	CC	TT	TC	TT	TT	TT
Gm15_50864537_A_G	Gm15	51665436	AG	GG	GG	AG	AG	--	AG	GG	GG	AG	AG	AA	AG	GG	GG	AG	GG	GG	AG	AG	AG	GG	GG	AG	GG	GG	GG	AG	AG	GG	AG	AG	GG	GG	AG	--	AG	AG	AG	GG	AG	GG	AG	--	AG	AG	AG
Gm16_35846_A_G	Gm16	35655	GG	GG	GG	GG	GG	GG	GG	GG	GG	GG	GG	GG	GG	GG	GG	GG	GG	GG	GG	GG	GG	GG	GG	GG	GG	GG	GG	GG	GG	GG	GG	GG	GG	GG	GG	GG	GG	GG	GG	GG	GG	GG	GG	GG	GG	GG	GG
Gm16_103052_T_C	Gm16	102882	CC	CC	CC	CC	CC	CC	CC	CC	CC	CC	CC	CC	CC	CC	CC	CC	CC	CC	CC	CC	CC	CC	CC	CC	CC	CC	CC	CC	CC	CC	CC	CC	CC	CC	CC	CC	CC	CC	CC	CC	CC	CC	CC	CC	CC	CC	CC
Gm16_298188_C_A	Gm16	298020	CC	CC	CC	CC	CC	CC	CC	CC	CC	CC	CC	CC	CC	CC	CC	CC	CC	CC	CC	CC	CC	CC	CC	CC	CC	CC	CC	CC	CC	CC	--	CC	CC	CC	CC	CC	CC	CC	CC	CC	CC	CC	CC	CC	CC	CC	CC
Gm16_486857_G_A	Gm16	486741	GG	GG	GG	GG	GG	GG	GG	GG	GG	GG	GG	GG	GG	GG	GG	GG	GG	GG	GG	GG	GG	GG	GG	GG	GG	GG	GG	GG	GG	GG	GG	GG	GG	GG	GG	GG	GG	GG	GG	GG	GG	GG	GG	GG	GG	GG	GG
Gm16_761034_G_T	Gm16	759723	TT	TT	TT	TT	TT	TT	TT	TT	TT	TT	TT	TT	TT	TT	TT	TT	TT	TT	TT	TT	TT	TT	TT	TT	TT	TT	TT	TT	TT	TT	TT	TT	TT	TT	TT	TT	TT	TT	TT	TT	TT	TT	TT	TT	TT	TT	TT
Gm16_1101441_C_A	Gm16	1109881	CC	CC	CC	CC	CC	CC	CC	CC	CC	CC	CC	CC	CC	CC	CC	CC	CC	CC	CC	CC	CC	CC	CC	CC	CC	CC	CC	CC	CC	CC	CC	CC	CC	CC	CC	CC	CC	CC	CC	CC	CC	CC	CC	CC	CC	CC	CC
Gm16_1332815_C_T	Gm16	1341384	TT	TT	TT	TT	TT	TT	TT	TT	TT	TT	TT	TT	TT	TT	TT	TT	TT	TT	TT	TT	TT	TT	TT	TT	TT	TT	TT	TT	TT	TT	TT	TT	TT	TT	TT	TT	TT	TT	TT	TT	TT	TT	TT	TT	TT	TT	TT
Gm16_1484224_C_T	Gm16	1500606	TT	TT	TT	TT	TT	TT	TT	TT	TT	TT	TT	TT	TT	TT	TT	TT	TT	TT	TT	TT	TT	TT	TT	TT	TT	TT	TT	TT	TT	TT	TT	TT	TT	TT	TT	TT	TT	TT	TT	TT	TT	TT	TT	TT	TT	TT	TT
Gm16_1708510_C_T	Gm16	1725360	TT	TC	TT	TT	CC	TT	TT	TT	--	TT	TT	--	CC	TT	CC	TC	CC	TC	TT	TT	TT	TT	TT	--	CC	TT	CC	TT	--	TT	TT	CC	CC	TT	CC	CC	TT	TT	TT	CC	TT	TT	TT	TC	TT	TT	TT
Gm16_1936692_C_A	Gm16	1959037	--	CC	AA	AA	CC	--	AC	AA	CC	AC	AC	--	CC	AA	CC	CC	CC	CC	AA	AA	AA	AA	AA	CC	CC	AA	CC	AA	AC	AA	AA	CC	CC	AA	CC	CC	AA	AA	--	CC	AA	AC	AC	CC	AA	AA	--
Gm16_2619084_C_T	Gm16	2643391	CC	CC	CC	CC	CC	CC	CC	CC	CC	CC	CC	CC	CC	CC	CC	CC	CC	CC	CC	CC	CC	CC	CC	CC	CC	CC	CC	CC	CC	CC	CC	CC	CC	CC	CC	CC	CC	CC	CC	CC	CC	CC	CC	CC	CC	CC	CC
Gm16_2950818_G_A	Gm16	2975872	GG	GG	GG	GG	GG	GG	GG	GG	GG	GG	GG	GG	GG	GG	GG	GG	GG	GG	GG	GG	GG	GG	GG	GG	GG	GG	GG	GG	GG	GG	GG	GG	GG	GG	GG	GG	GG	GG	GG	GG	GG	GG	GG	GG	GG	GG	GG
Gm16_3099668_A_C	Gm16	3124736	CC	CC	CC	CC	CC	CC	CC	CC	CC	CC	CC	CC	CC	CC	CC	CC	CC	CC	CC	CC	CC	CC	CC	CC	CC	CC	CC	CC	CC	CC	CC	CC	CC	CC	CC	CC	CC	CC	CC	CC	CC	CC	CC	CC	CC	CC	CC
Gm16_3541782_T_C	Gm16	3566872	TC	TT	TC	TC	TT	TC	TC	TC	TC	TC	TC	--	TC	TC	TT	TT	TC	TT	TC	TC	TT	TT	TC	TT	TT	TC	TT	TT	TC	TC	TC	TT	TT	TC	TT	TT	TC	TC	TC	TT	TC	--	TC	TC	TC	TC	TC
Gm16_3598173_C_T	Gm16	3623115	TT	TT	TT	TT	TT	TT	TT	TT	TT	TT	TT	TT	TT	TT	TT	TT	TT	TT	TT	TT	TT	TT	TT	TT	TT	TT	TT	TT	TT	TT	TT	TT	TT	TT	TT	TT	TT	TT	TT	TT	TT	TT	TT	TT	TT	TT	TT
Gm16_3775913_T_C	Gm16	3796947	CC	TT	CC	CC	TT	CC	CC	CC	CC	CC	CC	TT	CC	CC	TC	TT	CC	TT	CC	CC	TT	TT	TC	TC	TT	CC	TT	TT	CC	CC	CC	TT	TT	CC	CC	TT	CC	CC	CC	TT	CC	TC	CC	CC	CC	CC	CC
Gm16_3917294_A_C	Gm16	3937698	CC	AC	CC	CC	AA	CC	CC	CC	CC	CC	CC	AC	CC	CC	--	AC	CC	AC	CC	CC	AA	--	AC	--	AA	CC	AA	AA	CC	CC	CC	AA	AA	CC	CC	AA	CC	CC	CC	AA	CC	AC	CC	CC	CC	CC	CC
Gm16_3962328_C_A	Gm16	3982748	AA	CC	AA	AA	CC	AA	AA	AA	AA	AA	AA	CC	AA	AA	AC	CC	AA	CC	--	AA	CC	CC	--	AC	CC	--	CC	CC	--	AA	AA	CC	CC	AA	AA	CC	AA	AA	AA	CC	AA	--	AA	AA	AA	AA	AA
Gm16_4285389_A_G	Gm16	4306664	GG	AA	GG	GG	AA	GG	GG	GG	GG	GG	GG	AA	GG	GG	AA	AA	GG	AA	GG	GG	AA	AA	AG	GG	AA	GG	AA	AA	GG	GG	GG	AA	AA	GG	GG	AA	GG	GG	GG	AA	GG	AG	GG	GG	GG	GG	GG
Gm16_4351139_A_C	Gm16	4378162	AA	CC	AA	AA	CC	AA	AA	AA	AA	AA	AA	CC	AA	AA	CC	CC	AA	CC	AA	AA	CC	CC	--	AC	CC	--	CC	CC	--	AA	AA	CC	CC	AA	AA	CC	AA	AA	AA	CC	AA	--	AA	AA	AA	AA	AA
Gm16_4908430_C_T	Gm16	4936673	TT	TT	TT	TT	TT	TT	TT	TT	TT	TT	TT	TT	TT	TT	TT	TT	TT	TT	TT	TT	TT	TT	TT	TT	TT	TT	TT	TT	TT	TT	TT	TT	TT	TT	TT	TT	TT	TT	TT	TT	TT	TT	TT	TT	TT	TT	TT
Gm16_5477316_T_C	Gm16	5503867	CC	TT	CC	CC	TT	TT	CC	TT	CC	CC	CC	TT	CC	TT	CC	--	CC	TT	--	CC	TT	TT	TT	TC	CC	--	TT	TT	--	CC	CC	CC	TT	TT	CC	TT	CC	CC	TC	TC	CC	TT	CC	CC	CC	CC	CC
Gm16_5566956_T_C	Gm16	5593545	CC	TT	CC	CC	TT	TT	CC	TT	CC	CC	CC	TT	CC	TT	CC	--	CC	TT	TT	CC	TT	TT	TT	TC	CC	--	TT	TT	TC	CC	CC	CC	TT	TT	CC	TT	CC	CC	TC	--	CC	TT	CC	CC	CC	CC	CC
Gm16_5998589_A_G	Gm16	6042142	AA	GG	AA	AA	GG	GG	AA	GG	AA	AA	AA	--	AA	GG	AA	--	AA	GG	GG	AA	GG	GG	GG	AG	AA	--	GG	GG	AG	AA	AA	AA	GG	GG	AA	GG	AA	AA	AG	--	AA	GG	AA	AA	AA	AA	AA
Gm16_6061510_C_T	Gm16	6105250	TT	TT	TT	TT	TT	TT	TT	TT	TT	TT	TT	TT	TT	TT	TT	TT	TT	TT	TT	TT	TT	TT	TT	TT	TT	TT	TT	TT	TT	TT	TT	TT	TT	TT	TT	TT	TT	TT	TT	TT	TT	TT	TT	TT	TT	TT	TT
Gm16_6179363_T_G	Gm16	6222257	TT	GG	TT	TT	GG	GG	--	GG	--	TT	TT	--	TT	GG	TT	--	TT	GG	GG	TT	GG	GG	GG	TG	TG	TT	GG	TT	TG	TT	TT	TT	GG	GG	TT	GG	TT	TT	TG	--	TT	GG	TT	TT	TT	TT	TT
Gm16_6423098_G_A	Gm16	6570336	GG	AA	GG	GG	AA	AA	GG	AA	GG	GG	GG	AA	GG	AA	GG	AA	GG	AA	AA	GG	AA	AA	AA	--	GG	GG	AA	GG	GG	GG	GG	GG	AA	AA	GG	AA	GG	GG	GG	AG	GG	AA	GG	GG	GG	GG	GG
Gm16_6702694_C_T	Gm16	6858504	CC	CC	CC	CC	CC	CC	CC	CC	CC	CC	CC	CC	CC	CC	CC	CC	CC	CC	CC	CC	CC	CC	CC	CC	CC	CC	CC	CC	CC	CC	CC	CC	CC	CC	CC	CC	CC	CC	CC	CC	CC	CC	CC	CC	CC	CC	CC
Gm16_6868110_C_A	Gm16	7026287	CC	AA	CC	CC	AA	AA	CC	AA	CC	CC	CC	--	CC	AA	CC	--	CC	--	CC	CC	CC	AA	AA	CC	CC	CC	AA	CC	--	CC	CC	CC	AA	AA	CC	AA	CC	CC	--	CC	CC	--	CC	CC	CC	CC	CC
Gm16_7018526_T_C	Gm16	7176290	TC	CC	TT	TT	CC	CC	TT	CC	TT	TT	TT	CC	TT	CC	TT	CC	TT	CC	TT	TT	TT	CC	CC	TT	TT	TT	CC	TT	TC	TT	TT	TT	CC	CC	TT	CC	TT	TT	TC	TT	TT	CC	TT	TT	TT	TT	TT
Gm16_7070805_G_A	Gm16	7228568	GG	GG	GG	GG	GG	GG	GG	GG	GG	GG	GG	GG	GG	GG	GG	GG	GG	GG	GG	GG	GG	GG	GG	GG	GG	GG	GG	GG	GG	GG	GG	GG	GG	GG	GG	GG	GG	GG	GG	GG	GG	GG	GG	GG	GG	GG	GG
Gm16_7237873_A_G	Gm16	7396328	AA	AA	AA	AA	AA	AA	AA	AA	AA	AA	AA	AA	AA	AA	AA	AA	AA	AA	AA	AA	AA	AA	AA	AA	AA	AA	AA	AA	AA	AA	AA	AA	AA	AA	AA	AA	AA	AA	AA	AA	AA	AA	AA	AA	AA	AA	AA
Gm16_7364708_A_G	Gm16	7523163	AA	AA	AA	AA	AA	AA	AA	AA	AA	AA	AA	AA	AA	AA	AA	AA	AA	AA	AA	AA	AA	AA	AA	AA	AA	AA	AA	AA	AA	AA	AA	AA	AA	AA	AA	AA	AA	AA	AA	AA	AA	AA	AA	AA	AA	AA	AA
Gm16_7407374_G_A	Gm16	7565829	AA	AA	GG	GG	AA	AA	GG	AA	GG	GG	GG	--	GG	AA	GG	--	AA	AA	GG	GG	GG	AA	AA	GG	GG	GG	AA	GG	AG	GG	GG	GG	AA	AA	GG	AA	GG	GG	AG	GG	GG	AA	GG	GG	GG	GG	GG
Gm16_7460429_A_G	Gm16	7618884	AG	AG	AA	AA	AG	AG	AA	AG	AA	AA	AA	GG	AA	AG	AA	AG	AG	AG	AA	AA	AA	AG	AG	AA	AA	AA	AG	AA	--	AA	AA	AA	AG	AG	AA	AG	AA	AA	--	AA	AA	AG	AA	AA	AA	AA	AA
Gm16_7525351_G_A	Gm16	7683810	AA	AA	GG	GG	AA	--	GG	AA	GG	GG	GG	AG	GG	AA	GG	--	AA	AA	GG	GG	GG	AA	AA	GG	GG	GG	AA	GG	--	GG	GG	GG	AA	AA	GG	AA	GG	GG	--	GG	GG	--	GG	GG	GG	GG	GG
Gm16_7636967_C_T	Gm16	7795526	TT	TT	CC	CC	TT	TT	CC	TT	CC	CC	CC	TT	CC	TT	CC	TT	TT	TT	CC	CC	CC	TT	TT	CC	CC	CC	TT	CC	CC	CC	CC	CC	TT	TT	CC	TT	CC	CC	CC	CC	CC	TT	CC	CC	CC	CC	CC
Gm16_7743486_G_T	Gm16	7901348	TT	TT	GG	GG	TT	TT	GG	TT	GG	GG	GG	TT	GG	TT	GG	TT	TT	TT	GG	GG	GG	TT	TT	GG	GG	GG	TT	GG	GG	GG	GG	GG	TT	TT	GG	TT	GG	GG	GG	GG	GG	TT	GG	GG	GG	GG	GG
Gm16_7851145_G_A	Gm16	8008387	AA	AA	GG	GG	AA	AA	GG	AA	GG	GG	GG	AA	GG	AA	GG	AA	AA	AA	GG	GG	GG	AA	AG	GG	GG	GG	AA	GG	AG	GG	GG	GG	AA	AA	GG	AA	GG	GG	AG	--	GG	AA	GG	GG	GG	GG	GG
Gm16_7947809_A_C	Gm16	8103820	CC	CC	AA	AA	CC	CC	AA	CC	AA	AA	AA	CC	AA	CC	AA	CC	AA	CC	AA	AA	AA	CC	AC	AA	AA	AA	CC	AA	AC	AA	AA	AA	CC	CC	AA	CC	AA	AA	--	--	AA	CC	AA	AA	AA	AA	AA
Gm16_8354720_G_A	Gm16	8511733	AA	AA	GG	GG	AA	AA	GG	AA	GG	GG	GG	--	GG	AA	GG	--	GG	AA	GG	GG	GG	AA	AG	GG	GG	GG	AA	GG	AG	GG	GG	GG	AA	AA	GG	AA	GG	GG	--	--	GG	AA	GG	GG	GG	GG	GG
Gm16_8415385_G_A	Gm16	8571819	AA	AA	GG	GG	AA	AA	GG	AA	GG	GG	GG	AA	GG	AA	GG	AA	GG	AA	GG	GG	GG	AA	AG	GG	GG	GG	AA	GG	AG	GG	GG	GG	AA	AA	GG	AA	GG	GG	--	--	GG	AA	GG	GG	GG	GG	GG
Gm16_8540188_T_C	Gm16	8704236	CC	CC	TT	TT	CC	CC	TT	CC	TT	TT	TT	--	TT	CC	TT	--	TT	CC	TT	TT	TT	CC	TC	TT	TT	TT	CC	TT	TC	TT	TT	TT	CC	CC	TT	CC	TT	TT	--	--	TT	CC	TT	TT	TT	TT	TT
Gm16_9014032_G_T	Gm16	9183887	TT	TT	GG	GG	TT	TT	GG	TT	GG	GG	GG	--	GG	TT	GG	--	GG	TT	GG	GG	GG	TT	TG	GG	GG	GG	TT	GG	TG	GG	GG	GG	TT	TT	GG	TT	GG	GG	TG	--	GG	TT	GG	GG	GG	GG	GG
Gm16_9593365_G_T	Gm16	9764601	TT	TT	GG	GG	TT	TT	GG	TT	GG	GG	GG	--	GG	TT	GG	TT	GG	TT	GG	GG	GG	TT	TG	GG	GG	GG	TT	GG	TG	GG	GG	GG	TT	TT	GG	TT	GG	GG	TG	--	GG	TT	GG	GG	GG	GG	GG
Gm16_10243181_A_G	Gm16	10412660	GG	GG	AA	AA	GG	--	AA	GG	AA	AA	AA	AG	AA	GG	AA	AG	AA	GG	AA	AA	AA	GG	--	AA	AA	AA	GG	AA	--	AA	AA	AA	GG	GG	AA	GG	AA	AA	--	AG	AA	--	AA	AA	AA	AA	AA
Gm16_10793089_G_A	Gm16	10961849	AA	AA	GG	GG	AA	--	GG	AA	GG	GG	GG	AG	GG	AA	GG	AG	GG	AA	GG	GG	GG	AA	--	GG	GG	GG	AA	GG	AG	GG	GG	GG	AA	AA	GG	AA	GG	GG	--	AG	GG	--	GG	GG	GG	GG	GG
[truncated: 648 more rows]
[truncated: 354 more columns]

## Sheet: all_snps_final
-1	-1	1	1	1	-1	1	-1	-1	-1	1	1	-1	-1	1	-1	1	1	-1	1	1	1	-1	1	1	-1	1	-1	-1	1	1	0	0	0	NA	0	-1	-1	-1	1	NA	1	1	-1	-1	-1	1	-1	-1	1
1	-1	-1	1	1	-1	1	-1	-1	-1	1	1	-1	-1	1	-1	1	NA	0	0	1	NA	NA	0	1	-1	0	NA	0	0	1	-1	-1	1	1	-1	-1	-1	-1	1	-1	-1	-1	0	-1	-1	1	-1	-1	-1
-1	-1	1	1	1	-1	1	-1	-1	0	1	1	-1	-1	1	-1	1	-1	1	-1	1	-1	0	-1	1	-1	-1	1	1	-1	1	-1	-1	-1	-1	1	NA	1	1	NA	NA	-1	-1	0	-1	-1	1	-1	-1	-1
1	-1	-1	0	-1	1	1	1	-1	1	1	1	-1	1	-1	1	1	1	-1	1	1	1	-1	1	1	-1	1	-1	-1	1	1	-1	-1	1	1	-1	-1	-1	-1	1	1	1	1	-1	-1	-1	1	-1	-1	1
0	-1	NA	NA	0	-1	1	-1	-1	-1	1	1	-1	-1	-1	1	1	1	-1	1	1	1	-1	1	1	-1	1	-1	-1	1	1	-1	-1	1	1	-1	-1	-1	-1	1	1	1	1	-1	-1	-1	1	-1	-1	1
1	-1	-1	-1	-1	1	1	1	-1	1	1	1	-1	1	-1	1	1	1	-1	1	1	1	-1	1	1	-1	1	-1	-1	1	1	-1	-1	1	1	-1	-1	-1	-1	1	NA	1	1	-1	-1	-1	1	-1	-1	1
1	-1	-1	NA	-1	1	1	1	-1	1	1	1	-1	1	-1	-1	1	1	-1	1	1	1	-1	1	1	-1	1	-1	-1	1	1	-1	-1	1	1	-1	-1	-1	-1	1	1	1	1	-1	-1	-1	1	-1	-1	1
1	-1	-1	NA	-1	1	1	1	-1	1	1	1	-1	-1	1	-1	1	-1	1	-1	1	-1	NA	-1	1	-1	-1	1	1	-1	1	-1	-1	1	1	-1	-1	-1	-1	1	1	1	1	-1	-1	-1	1	-1	-1	-1
1	-1	-1	-1	-1	1	1	1	-1	1	1	1	-1	1	-1	1	1	1	-1	1	1	1	-1	1	1	-1	1	-1	-1	1	1	-1	-1	1	1	-1	-1	-1	-1	1	1	1	1	-1	-1	-1	1	-1	-1	1
1	-1	-1	0	-1	1	1	1	-1	1	1	1	-1	1	-1	0	1	1	-1	1	1	1	-1	1	1	-1	1	-1	-1	1	1	-1	-1	1	1	-1	-1	-1	-1	1	1	1	1	-1	-1	-1	1	-1	-1	1
1	-1	-1	-1	-1	-1	1	-1	-1	-1	1	1	-1	-1	-1	1	1	1	-1	1	1	1	-1	1	1	-1	1	-1	-1	1	1	-1	-1	1	1	-1	-1	-1	-1	1	1	1	1	-1	-1	-1	1	-1	-1	1
1	-1	NA	0	NA	NA	1	1	-1	1	1	1	-1	1	-1	1	1	1	-1	1	1	1	-1	1	1	-1	1	-1	-1	1	1	-1	-1	NA	1	-1	-1	-1	-1	1	0	1	NA	-1	-1	-1	1	-1	-1	NA
-1	-1	1	1	1	-1	1	-1	-1	-1	1	1	-1	-1	1	1	1	1	-1	1	1	1	-1	1	1	-1	1	-1	-1	1	1	-1	-1	-1	-1	1	1	1	1	-1	-1	-1	-1	NA	-1	-1	1	-1	-1	-1
1	-1	-1	-1	-1	1	1	1	-1	1	1	1	-1	1	-1	1	1	1	-1	1	1	1	-1	1	1	-1	1	-1	-1	1	1	-1	-1	1	1	-1	-1	-1	-1	1	1	1	1	-1	-1	-1	1	-1	-1	1
-1	-1	1	1	1	-1	1	-1	-1	-1	1	1	-1	-1	1	-1	1	1	-1	1	1	1	-1	1	1	-1	1	-1	-1	1	1	-1	-1	-1	-1	1	1	1	1	-1	-1	-1	-1	0	-1	-1	1	-1	-1	-1
1	-1	-1	0	-1	1	1	1	-1	1	1	1	-1	1	-1	0	1	1	-1	1	1	1	-1	1	1	-1	1	-1	-1	1	1	-1	-1	1	1	-1	-1	-1	-1	1	1	1	1	-1	-1	-1	1	-1	-1	1
0	-1	NA	NA	0	0	1	-1	-1	-1	1	1	-1	-1	1	-1	1	-1	1	-1	1	-1	NA	-1	1	-1	-1	1	-1	1	1	-1	-1	1	1	-1	-1	-1	-1	1	1	1	1	-1	-1	-1	1	-1	-1	1
1	-1	-1	0	-1	1	1	1	-1	1	1	1	-1	1	-1	0	1	1	-1	1	1	1	-1	1	1	-1	1	-1	-1	1	1	-1	-1	1	1	-1	-1	-1	-1	1	1	1	1	-1	-1	-1	1	-1	-1	1
0	-1	0	NA	-1	1	1	1	-1	1	1	1	-1	1	-1	0	1	NA	-1	1	1	NA	-1	1	1	-1	1	-1	-1	1	1	-1	-1	1	1	-1	-1	-1	-1	1	1	1	1	-1	-1	-1	1	-1	-1	1
-1	-1	1	1	1	-1	1	-1	-1	-1	1	1	-1	-1	1	-1	1	NA	0	0	1	0	NA	0	1	-1	0	0	0	0	1	-1	-1	-1	-1	1	1	1	1	-1	-1	-1	-1	0	-1	-1	1	-1	-1	-1
1	-1	-1	-1	-1	1	1	1	-1	1	1	1	-1	1	-1	1	1	-1	1	-1	1	-1	NA	-1	1	-1	-1	1	1	-1	1	NA	0	1	1	-1	-1	-1	-1	1	1	1	1	-1	-1	-1	1	-1	-1	-1
-1	-1	1	1	1	-1	1	-1	-1	-1	1	1	-1	-1	1	-1	1	-1	1	-1	1	-1	0	-1	1	-1	-1	1	1	-1	1	-1	-1	-1	-1	1	0	NA	1	NA	NA	-1	-1	NA	-1	-1	1	-1	-1	-1
-1	-1	NA	1	NA	-1	1	-1	-1	-1	1	1	-1	-1	1	0	1	0	-1	1	1	0	-1	1	NA	-1	1	-1	-1	1	1	-1	-1	0	NA	0	-1	-1	-1	1	NA	1	1	-1	-1	-1	1	-1	-1	1
1	-1	-1	NA	-1	1	1	1	-1	1	1	1	-1	1	-1	1	1	1	-1	1	1	1	-1	1	1	-1	1	-1	-1	1	1	-1	-1	0	0	0	NA	NA	1	-1	-1	-1	-1	0	-1	-1	1	-1	-1	-1
1	-1	-1	-1	-1	1	1	1	-1	1	1	1	-1	1	-1	1	1	1	-1	1	1	1	-1	1	1	-1	1	-1	-1	1	1	-1	-1	-1	-1	1	1	1	1	-1	-1	-1	-1	0	-1	-1	1	-1	-1	1
1	-1	-1	0	-1	1	1	1	-1	1	1	1	-1	1	-1	1	1	1	-1	1	1	1	-1	1	1	-1	1	-1	-1	1	1	-1	-1	1	1	-1	-1	-1	-1	1	1	1	1	-1	-1	-1	1	-1	-1	1
-1	-1	1	1	1	-1	1	-1	-1	-1	1	1	-1	-1	1	-1	1	1	-1	1	1	1	-1	1	1	-1	1	-1	-1	1	1	-1	-1	1	1	-1	-1	-1	-1	1	1	1	1	-1	-1	-1	1	-1	-1	1
-1	-1	1	1	1	-1	1	-1	-1	-1	1	1	-1	1	-1	1	1	1	-1	1	1	1	-1	1	1	-1	1	-1	-1	1	1	-1	-1	-1	-1	1	1	1	1	-1	-1	-1	-1	0	-1	-1	1	-1	-1	-1
-1	-1	1	1	1	1	1	1	-1	1	1	1	-1	1	-1	NA	1	0	0	0	1	NA	NA	0	1	-1	0	0	0	NA	1	-1	-1	1	1	-1	-1	-1	-1	1	1	1	1	-1	-1	-1	1	-1	-1	1
1	-1	-1	-1	-1	1	1	1	-1	1	1	1	-1	1	-1	1	1	1	-1	1	1	1	-1	1	1	-1	1	-1	-1	1	1	-1	-1	1	1	-1	-1	-1	-1	1	1	1	1	-1	-1	-1	1	-1	-1	1
1	NA	-1	0	-1	1	1	1	-1	1	1	0	-1	1	-1	0	0	0	-1	1	1	1	-1	1	0	-1	1	-1	-1	1	1	-1	-1	1	1	-1	-1	-1	-1	1	1	1	1	-1	-1	-1	1	-1	-1	1
1	-1	-1	-1	-1	1	1	1	-1	1	1	1	-1	1	-1	1	1	-1	1	-1	1	-1	NA	-1	1	-1	-1	1	1	1	1	-1	-1	1	1	-1	-1	-1	-1	1	1	1	1	-1	-1	-1	1	-1	-1	1
1	-1	-1	-1	-1	1	1	1	-1	1	1	1	-1	1	-1	1	1	1	-1	1	1	1	-1	1	1	-1	1	-1	-1	1	1	-1	-1	1	1	-1	-1	-1	-1	1	1	1	1	-1	-1	-1	1	-1	-1	1
1	-1	-1	-1	-1	1	1	1	-1	1	1	1	-1	1	-1	1	1	1	-1	1	1	1	-1	1	1	-1	1	-1	-1	1	1	-1	-1	1	1	-1	-1	-1	-1	1	1	1	1	-1	-1	-1	1	-1	-1	1
1	-1	-1	-1	-1	1	1	1	-1	1	1	1	-1	1	-1	1	1	1	-1	1	1	1	-1	1	1	-1	1	-1	-1	1	1	-1	-1	1	1	-1	-1	-1	-1	NA	0	0	0	NA	-1	-1	1	-1	-1	0
1	-1	-1	-1	-1	1	1	1	-1	1	1	1	-1	1	-1	1	1	1	-1	1	1	1	-1	1	1	-1	1	-1	-1	1	1	-1	-1	1	1	-1	-1	-1	-1	1	NA	1	1	-1	-1	-1	1	-1	-1	1
1	-1	-1	-1	-1	1	1	1	-1	1	1	1	-1	1	-1	1	1	1	-1	1	1	1	-1	1	1	-1	1	1	1	-1	1	-1	-1	-1	-1	1	1	1	1	-1	-1	-1	-1	NA	-1	-1	1	-1	-1	-1
1	-1	-1	-1	-1	1	1	1	-1	-1	1	1	-1	-1	1	-1	1	1	-1	1	1	1	-1	1	1	-1	1	-1	-1	1	1	-1	-1	1	1	-1	-1	-1	-1	1	1	1	1	-1	-1	-1	1	-1	-1	1
-1	-1	1	1	1	-1	1	-1	-1	-1	1	1	-1	-1	1	-1	1	1	-1	1	1	1	-1	1	1	-1	1	-1	-1	1	1	-1	-1	1	1	-1	-1	-1	-1	1	1	1	1	-1	-1	-1	1	-1	-1	1
1	-1	-1	-1	-1	1	1	1	-1	1	1	1	-1	1	-1	1	1	1	-1	1	1	1	-1	1	1	-1	1	-1	-1	1	1	-1	-1	1	1	-1	-1	-1	-1	1	1	1	1	-1	-1	-1	1	-1	-1	1
1	-1	-1	-1	-1	1	1	1	-1	1	1	1	-1	1	-1	1	1	1	-1	1	1	1	-1	1	1	-1	1	-1	-1	1	1	-1	-1	1	1	-1	-1	-1	-1	1	1	1	1	-1	-1	-1	1	-1	-1	1
1	-1	-1	-1	-1	1	1	1	-1	1	1	1	-1	1	-1	-1	1	-1	1	-1	1	-1	0	-1	1	-1	1	-1	-1	1	1	-1	-1	1	1	-1	-1	-1	-1	1	1	1	1	-1	-1	-1	1	-1	-1	0
NA	-1	0	NA	NA	0	1	0	-1	0	1	1	-1	0	0	0	1	1	-1	1	1	1	-1	1	1	-1	1	-1	-1	1	1	-1	-1	1	1	-1	-1	-1	-1	1	1	1	1	-1	-1	-1	1	-1	-1	1
NA	-1	NA	0	-1	1	1	1	-1	1	1	1	-1	1	-1	0	1	NA	-1	1	1	NA	-1	1	1	-1	1	-1	-1	1	1	-1	-1	1	1	-1	-1	-1	-1	1	1	1	1	-1	-1	-1	1	-1	-1	1
0	-1	0	NA	0	0	1	0	-1	NA	1	1	-1	0	0	NA	1	1	-1	1	1	1	-1	1	1	-1	1	-1	-1	1	1	-1	-1	1	1	-1	-1	-1	-1	1	1	1	1	-1	-1	-1	1	-1	-1	1
1	-1	-1	-1	-1	1	1	1	-1	1	1	1	-1	1	-1	1	1	1	-1	1	1	1	-1	1	1	-1	1	1	1	-1	1	-1	-1	-1	-1	1	1	1	1	-1	-1	-1	-1	0	-1	-1	1	-1	-1	-1
-1	-1	1	1	1	-1	1	-1	-1	-1	1	1	-1	-1	1	-1	1	1	-1	1	1	1	-1	1	1	-1	1	-1	-1	1	1	-1	-1	1	1	-1	-1	-1	-1	1	1	1	1	-1	-1	-1	1	-1	-1	1
NA	-1	NA	0	NA	1	1	1	-1	1	1	1	-1	1	-1	1	1	1	-1	1	1	1	-1	1	1	-1	1	-1	-1	1	1	-1	-1	1	1	-1	-1	-1	-1	1	1	1	1	-1	-1	-1	1	-1	-1	1
-1	-1	1	1	1	-1	1	-1	-1	-1	1	1	-1	-1	-1	-1	1	-1	1	-1	1	-1	0	-1	1	-1	-1	1	1	1	1	-1	-1	1	1	-1	-1	1	1	-1	-1	-1	-1	0	-1	-1	1	-1	-1	-1
1	-1	-1	-1	-1	1	1	1	-1	1	1	1	-1	1	-1	1	1	-1	1	-1	1	-1	0	-1	1	-1	-1	1	1	-1	1	-1	-1	0	0	1	1	1	1	-1	-1	-1	-1	0	-1	-1	1	-1	-1	-1
1	-1	-1	-1	-1	1	1	1	-1	1	1	1	-1	1	-1	1	1	1	-1	1	1	1	-1	1	1	-1	1	-1	-1	1	1	-1	-1	1	1	-1	-1	-1	-1	1	1	1	1	-1	-1	-1	1	-1	-1	0
1	-1	-1	0	-1	1	1	1	-1	1	1	1	-1	1	-1	0	1	1	-1	1	1	1	-1	1	1	-1	1	-1	-1	1	1	-1	-1	-1	-1	1	0	NA	1	NA	NA	-1	-1	0	-1	-1	1	-1	-1	-1
1	-1	-1	-1	-1	1	1	1	-1	1	1	1	-1	1	-1	1	1	1	-1	1	1	1	-1	1	1	-1	1	-1	-1	1	1	-1	-1	1	1	-1	-1	-1	-1	1	1	1	1	-1	-1	-1	1	-1	-1	1
1	-1	-1	-1	-1	1	1	1	-1	1	1	1	-1	1	-1	0	0	NA	-1	1	1	1	-1	1	0	-1	NA	-1	-1	NA	1	-1	-1	NA	NA	NA	0	0	0	0	0	0	0	NA	-1	-1	1	-1	-1	0
-1	-1	1	1	1	-1	1	-1	-1	-1	1	1	-1	-1	-1	1	1	1	-1	1	1	1	-1	1	1	-1	1	-1	-1	1	1	-1	-1	1	1	-1	-1	-1	-1	1	1	1	1	-1	-1	-1	1	-1	-1	1
1	-1	-1	-1	-1	1	1	1	-1	1	1	1	-1	1	-1	1	1	1	-1	1	1	1	-1	1	1	-1	1	-1	-1	1	1	1	1	-1	-1	1	1	1	1	-1	-1	-1	-1	0	-1	-1	1	-1	-1	-1
1	-1	-1	-1	-1	1	1	1	-1	1	1	1	-1	1	-1	1	1	1	-1	1	1	1	-1	1	1	-1	1	-1	-1	1	1	-1	-1	1	1	-1	-1	-1	-1	1	1	1	1	-1	-1	-1	1	-1	-1	1
1	-1	-1	-1	-1	1	1	1	-1	1	1	1	-1	1	-1	NA	1	-1	1	-1	1	-1	0	-1	1	-1	-1	1	1	NA	1	0	NA	NA	NA	1	0	0	NA	0	NA	-1	-1	0	-1	-1	1	-1	-1	-1
1	-1	-1	-1	-1	1	1	1	-1	1	1	1	-1	1	-1	-1	1	-1	1	-1	1	-1	NA	-1	1	-1	-1	1	1	-1	1	-1	-1	-1	-1	1	1	1	1	-1	-1	-1	-1	0	-1	-1	1	-1	-1	-1
-1	-1	1	1	1	-1	1	-1	-1	-1	1	1	-1	-1	1	1	1	1	-1	1	1	1	-1	1	1	-1	1	-1	-1	1	1	-1	-1	1	1	-1	-1	-1	-1	1	1	1	1	-1	-1	-1	1	-1	-1	1
1	-1	-1	-1	-1	1	1	1	-1	1	1	1	-1	1	-1	1	1	1	-1	1	1	1	-1	1	1	-1	1	-1	-1	1	1	-1	-1	1	1	-1	-1	-1	-1	1	1	1	1	-1	-1	-1	1	-1	-1	1
-1	-1	1	1	1	-1	1	NA	-1	NA	1	1	-1	0	0	0	1	1	-1	1	1	1	-1	1	1	-1	1	-1	-1	1	1	0	NA	0	1	-1	-1	-1	-1	1	1	1	1	-1	-1	-1	1	-1	-1	1
-1	-1	1	1	1	1	1	1	-1	1	1	1	-1	1	-1	1	1	1	-1	1	1	1	-1	1	1	-1	1	-1	-1	1	1	-1	-1	-1	-1	1	-1	-1	-1	1	1	1	1	-1	-1	-1	1	-1	-1	1
1	-1	-1	0	-1	1	1	1	-1	1	1	1	-1	1	-1	1	1	1	-1	1	1	1	-1	1	1	-1	1	-1	-1	1	1	-1	-1	NA	1	NA	-1	-1	-1	1	1	1	1	-1	-1	-1	1	-1	-1	1
1	-1	-1	-1	-1	1	1	1	-1	1	1	1	-1	1	-1	-1	1	1	-1	1	1	1	-1	1	1	-1	1	-1	-1	1	1	-1	-1	1	1	-1	-1	-1	-1	1	1	1	1	-1	-1	-1	1	-1	-1	1
1	-1	-1	0	-1	1	1	1	-1	1	1	1	-1	1	-1	1	1	1	-1	1	1	1	-1	1	1	-1	1	-1	-1	1	1	-1	-1	1	1	-1	-1	-1	-1	1	1	1	1	-1	NA	NA	NA	-1	-1	1
-1	-1	1	1	1	-1	1	-1	-1	-1	1	1	-1	1	-1	1	1	1	-1	1	1	1	-1	1	1	-1	1	-1	-1	1	1	-1	-1	1	1	-1	-1	-1	-1	1	1	1	1	-1	-1	-1	1	-1	-1	-1
1	-1	-1	-1	-1	1	1	1	-1	1	1	1	-1	1	-1	1	1	1	-1	1	1	1	-1	1	1	-1	1	-1	-1	1	1	-1	-1	1	1	-1	-1	-1	-1	1	1	1	1	-1	-1	-1	1	-1	-1	1
-1	-1	1	1	1	-1	1	1	-1	1	1	1	-1	1	-1	1	1	1	-1	1	1	1	-1	1	1	-1	1	-1	-1	1	1	-1	-1	1	1	-1	-1	-1	-1	1	1	1	1	-1	-1	-1	1	-1	-1	1
-1	-1	1	1	1	-1	1	-1	-1	-1	1	1	-1	1	-1	1	1	-1	-1	1	1	1	-1	1	1	-1	1	-1	-1	1	1	-1	-1	-1	-1	1	1	1	1	-1	-1	-1	-1	0	-1	-1	1	-1	-1	-1
-1	-1	1	1	1	-1	1	-1	-1	-1	1	1	-1	-1	1	-1	1	-1	1	-1	1	-1	0	-1	1	-1	-1	1	-1	1	1	-1	-1	1	1	-1	-1	-1	-1	1	1	1	1	-1	-1	-1	1	-1	-1	1
-1	-1	1	1	1	-1	1	-1	-1	-1	1	1	-1	-1	1	-1	1	-1	1	-1	1	-1	0	-1	1	-1	-1	1	1	-1	1	-1	-1	1	1	-1	-1	-1	-1	1	1	1	1	-1	-1	-1	1	-1	-1	1
0	-1	0	NA	0	1	1	1	-1	1	1	1	-1	1	-1	1	1	1	-1	1	1	1	-1	1	1	-1	1	-1	-1	1	1	-1	-1	1	1	-1	-1	-1	-1	1	1	1	1	-1	-1	-1	1	-1	-1	1
1	-1	-1	-1	-1	1	1	1	-1	1	1	1	-1	-1	1	-1	1	-1	1	-1	1	-1	0	-1	1	-1	-1	1	1	-1	1	NA	1	-1	-1	1	1	1	1	-1	-1	-1	-1	0	-1	-1	1	-1	-1	-1
-1	-1	1	1	1	-1	1	-1	-1	-1	1	1	-1	-1	1	-1	1	1	-1	1	1	1	-1	1	1	-1	1	-1	-1	1	1	-1	-1	1	1	-1	-1	-1	-1	1	1	1	1	-1	-1	-1	1	-1	-1	1
1	-1	-1	-1	-1	1	1	1	-1	1	1	1	-1	1	-1	1	1	1	-1	1	1	1	-1	1	1	-1	1	-1	-1	1	1	-1	-1	1	1	-1	-1	-1	-1	1	1	1	1	-1	-1	-1	1	-1	-1	1
-1	-1	1	1	1	-1	1	-1	-1	-1	1	1	-1	-1	-1	1	1	1	-1	1	1	1	-1	1	1	-1	1	-1	-1	1	1	-1	-1	1	1	-1	-1	1	1	-1	-1	-1	-1	0	-1	-1	1	-1	-1	1
1	-1	-1	-1	-1	1	1	1	-1	1	1	1	-1	1	-1	1	1	1	-1	1	1	1	-1	1	1	-1	1	-1	-1	NA	1	-1	-1	1	1	-1	-1	-1	-1	1	1	1	1	-1	-1	-1	1	-1	-1	1
1	-1	-1	-1	-1	1	1	1	-1	1	1	1	-1	1	-1	1	1	1	-1	1	1	1	-1	1	1	-1	1	-1	-1	1	1	-1	-1	1	1	-1	-1	-1	-1	1	1	1	1	-1	-1	-1	1	-1	-1	1
1	-1	-1	-1	-1	1	1	1	-1	1	1	1	-1	1	-1	1	1	-1	1	-1	1	-1	NA	-1	1	-1	-1	1	1	-1	1	-1	-1	1	1	-1	-1	-1	-1	1	1	1	1	-1	-1	-1	1	-1	-1	1
1	-1	-1	-1	-1	1	1	1	-1	1	1	1	-1	1	-1	1	1	1	-1	1	1	1	-1	1	1	-1	1	-1	-1	1	1	-1	-1	1	1	-1	-1	-1	-1	1	1	1	1	-1	-1	-1	1	-1	-1	1
-1	-1	1	1	1	-1	1	-1	-1	-1	1	1	-1	-1	1	-1	1	1	-1	1	1	1	-1	1	1	-1	1	-1	-1	1	1	-1	-1	1	1	-1	-1	-1	-1	1	1	1	1	-1	-1	-1	1	-1	-1	1
1	-1	-1	-1	-1	1	1	1	-1	-1	1	1	-1	-1	1	-1	1	-1	1	1	1	1	-1	1	1	-1	1	-1	-1	1	1	-1	-1	NA	NA	NA	0	0	0	0	0	0	0	NA	-1	-1	1	-1	-1	-1
-1	-1	1	1	1	-1	1	-1	-1	-1	1	1	-1	1	-1	1	1	1	-1	1	1	1	-1	1	1	-1	1	-1	-1	1	1	-1	-1	1	1	-1	-1	-1	-1	1	1	1	1	-1	-1	-1	1	-1	-1	1
1	-1	-1	-1	-1	1	1	1	-1	1	1	1	-1	1	-1	-1	-1	-1	-1	1	-1	-1	1	-1	1	1	-1	1	-1	-1	1	-1	-1	-1	-1	1	1	1	1	-1	-1	-1	-1	1	-1	-1	1	-1	-1	-1
1	-1	-1	-1	-1	1	1	1	-1	1	1	1	-1	1	1	-1	-1	-1	-1	1	-1	-1	1	-1	1	1	-1	1	-1	-1	-1	1	1	-1	-1	1	1	1	1	-1	-1	-1	-1	1	-1	-1	1	-1	-1	-1
1	-1	-1	-1	-1	0	1	1	0	0	0	1	-1	1	1	-1	-1	-1	-1	1	-1	-1	1	-1	1	1	-1	1	-1	-1	1	-1	-1	-1	-1	1	NA	1	1	-1	-1	-1	-1	1	-1	-1	1	-1	-1	-1
1	-1	-1	-1	-1	-1	1	1	NA	NA	-1	1	-1	1	NA	1	1	1	-1	1	1	NA	-1	NA	1	-1	0	-1	-1	-1	NA	-1	-1	-1	-1	1	1	1	1	-1	-1	-1	-1	1	-1	-1	1	-1	-1	-1
1	-1	-1	-1	-1	-1	1	1	-1	1	1	1	-1	NA	1	-1	-1	-1	-1	1	-1	-1	1	-1	1	-1	1	-1	-1	-1	-1	1	1	-1	-1	1	1	1	1	-1	-1	-1	-1	1	-1	-1	1	-1	-1	-1
1	-1	-1	-1	-1	-1	1	1	-1	1	1	1	-1	1	1	-1	-1	-1	-1	1	-1	-1	1	-1	1	-1	1	-1	-1	-1	-1	1	1	-1	-1	1	1	1	1	-1	-1	-1	-1	1	-1	-1	1	-1	-1	-1
1	-1	-1	-1	-1	1	1	1	-1	1	1	1	-1	1	-1	1	1	1	-1	1	1	1	-1	1	1	-1	1	-1	-1	-1	1	-1	-1	-1	-1	1	1	1	1	-1	-1	-1	-1	1	-1	-1	1	-1	-1	-1
1	-1	-1	-1	-1	1	1	1	-1	1	1	1	-1	1	-1	1	1	1	-1	1	1	1	-1	1	1	-1	1	-1	-1	-1	-1	-1	-1	-1	-1	1	1	1	1	-1	-1	-1	-1	1	-1	-1	1	-1	-1	-1
1	-1	-1	-1	-1	-1	1	1	1	-1	-1	1	-1	1	1	-1	-1	-1	-1	1	-1	-1	1	-1	1	1	-1	1	-1	-1	1	-1	-1	-1	-1	1	1	1	1	-1	-1	-1	-1	1	-1	-1	1	-1	-1	-1
1	-1	-1	-1	-1	NA	1	1	-1	1	1	1	-1	1	NA	-1	-1	-1	-1	1	-1	-1	1	-1	1	NA	0	NA	-1	-1	NA	-1	-1	-1	-1	1	0	NA	0	0	NA	-1	-1	1	0	NA	1	NA	-1	-1
1	-1	-1	-1	-1	NA	1	1	NA	NA	NA	1	-1	1	NA	-1	-1	-1	-1	1	-1	-1	1	-1	1	1	-1	1	-1	-1	-1	-1	-1	-1	-1	1	-1	-1	-1	1	0	1	1	1	1	1	-1	1	1	-1
1	-1	-1	-1	-1	-1	1	1	1	-1	-1	1	-1	1	1	-1	-1	0	-1	1	1	1	-1	1	1	-1	1	-1	-1	-1	-1	-1	-1	-1	-1	1	1	1	1	-1	-1	-1	-1	1	-1	-1	1	-1	-1	-1
1	-1	-1	-1	-1	-1	1	1	1	-1	-1	1	-1	1	1	-1	-1	-1	-1	1	-1	-1	1	-1	1	1	-1	1	-1	-1	1	-1	-1	-1	-1	1	1	1	1	-1	-1	-1	-1	1	-1	-1	1	-1	-1	-1
1	-1	-1	-1	-1	1	1	1	-1	1	1	1	-1	1	-1	1	1	1	-1	1	1	1	-1	1	1	-1	1	-1	-1	-1	-1	-1	-1	-1	-1	1	1	1	1	-1	-1	-1	-1	1	-1	-1	1	-1	-1	-1
1	-1	-1	-1	-1	-1	1	1	1	-1	-1	1	-1	NA	1	NA	0	NA	-1	1	-1	-1	1	-1	1	1	-1	1	-1	-1	1	1	1	-1	-1	1	1	1	1	-1	-1	-1	-1	1	-1	-1	1	-1	-1	-1
1	-1	-1	-1	-1	1	1	1	-1	1	1	1	-1	1	-1	1	1	-1	-1	1	-1	-1	1	-1	1	1	-1	1	-1	-1	-1	-1	-1	-1	-1	1	1	1	1	-1	-1	-1	-1	1	-1	-1	1	-1	-1	-1
1	-1	-1	-1	-1	1	1	1	-1	1	1	1	-1	1	-1	NA	1	-1	-1	1	-1	-1	1	-1	1	1	-1	1	-1	-1	1	-1	-1	-1	-1	1	1	1	1	-1	-1	-1	-1	1	-1	-1	1	-1	-1	-1
1	-1	-1	-1	-1	-1	1	1	1	-1	-1	1	-1	1	1	-1	-1	-1	-1	1	-1	-1	1	-1	1	1	-1	1	-1	-1	1	-1	-1	-1	-1	1	1	1	1	-1	-1	-1	-1	1	-1	-1	1	-1	-1	-1
1	-1	-1	-1	-1	1	1	1	-1	1	1	1	-1	1	-1	1	1	1	-1	1	1	1	-1	1	1	-1	1	-1	-1	-1	-1	-1	-1	-1	-1	1	1	1	1	-1	-1	-1	-1	1	-1	-1	1	-1	-1	-1
1	-1	-1	-1	-1	1	1	1	-1	1	1	1	-1	1	-1	1	1	-1	-1	1	-1	-1	1	-1	1	1	-1	1	-1	-1	1	-1	-1	-1	-1	1	1	1	1	-1	-1	-1	-1	1	-1	-1	1	-1	-1	-1
1	-1	-1	-1	-1	-1	1	1	1	-1	-1	1	-1	1	1	-1	-1	-1	-1	1	-1	-1	1	-1	1	1	-1	1	-1	-1	0	-1	-1	-1	-1	1	1	1	1	-1	-1	-1	-1	1	-1	-1	1	-1	-1	-1
1	-1	-1	-1	-1	-1	1	1	1	-1	-1	1	-1	1	1	-1	-1	-1	-1	1	-1	-1	1	-1	1	-1	1	-1	-1	-1	1	-1	-1	-1	-1	1	1	1	1	-1	-1	-1	-1	1	-1	-1	1	-1	-1	-1
1	-1	-1	-1	-1	-1	1	1	1	-1	-1	1	-1	1	1	-1	-1	1	-1	1	1	1	-1	1	1	-1	1	-1	-1	-1	1	-1	-1	-1	-1	1	1	1	1	-1	-1	-1	-1	1	-1	-1	1	-1	-1	-1
1	-1	-1	-1	-1	1	1	1	-1	1	1	1	-1	1	-1	1	1	1	-1	1	1	1	-1	1	1	-1	1	-1	-1	-1	1	-1	-1	-1	-1	1	1	1	1	-1	-1	-1	-1	1	-1	-1	1	-1	-1	-1
1	-1	-1	-1	-1	1	1	1	-1	1	1	1	-1	1	-1	1	1	1	-1	1	1	1	-1	1	1	-1	1	-1	-1	-1	0	-1	-1	-1	-1	1	1	1	1	-1	-1	-1	-1	1	-1	-1	1	-1	-1	-1
1	-1	-1	-1	-1	-1	1	1	1	-1	-1	1	-1	1	1	-1	-1	-1	-1	1	-1	-1	1	1	1	-1	1	-1	-1	-1	0	-1	-1	-1	-1	1	1	1	1	-1	-1	-1	-1	1	-1	-1	1	-1	-1	-1
1	-1	-1	-1	-1	-1	1	1	1	-1	-1	1	-1	1	1	-1	-1	-1	-1	1	-1	-1	1	-1	1	1	-1	1	-1	-1	1	-1	-1	-1	-1	1	1	1	1	-1	-1	-1	-1	1	-1	-1	1	-1	-1	-1
1	-1	-1	-1	-1	1	1	1	-1	1	1	1	-1	1	0	NA	0	1	-1	1	1	1	-1	1	1	-1	1	-1	-1	-1	-1	-1	-1	-1	-1	1	-1	-1	-1	1	1	1	1	1	-1	-1	1	-1	-1	-1
1	-1	-1	-1	-1	-1	1	1	1	-1	-1	1	-1	1	-1	1	1	1	-1	1	1	1	-1	1	1	-1	1	-1	-1	-1	-1	-1	-1	-1	-1	1	1	1	1	-1	-1	-1	-1	1	1	1	-1	1	1	-1
1	-1	-1	-1	-1	0	1	1	0	0	0	1	-1	1	0	NA	0	1	-1	1	1	1	-1	1	1	-1	1	-1	-1	-1	0	0	0	-1	-1	1	1	1	1	-1	-1	-1	-1	1	-1	-1	1	-1	-1	-1
1	-1	-1	-1	-1	-1	1	1	1	-1	-1	1	-1	1	1	-1	-1	-1	-1	1	-1	-1	1	-1	1	1	-1	1	-1	-1	-1	-1	-1	-1	-1	1	-1	-1	-1	1	1	1	1	1	1	NA	0	0	0	-1
1	-1	-1	-1	-1	1	1	1	-1	1	1	1	-1	1	1	1	1	1	-1	1	1	1	-1	1	1	-1	1	-1	-1	-1	-1	-1	-1	-1	-1	1	1	1	1	-1	-1	-1	-1	1	-1	-1	1	-1	-1	-1
1	-1	-1	-1	-1	-1	1	1	1	-1	-1	1	-1	1	1	-1	-1	1	-1	1	1	1	-1	1	1	-1	1	-1	-1	-1	-1	-1	-1	-1	-1	1	1	1	1	-1	-1	-1	-1	1	-1	-1	1	-1	-1	-1
1	-1	-1	-1	-1	-1	1	1	1	-1	-1	1	-1	1	1	-1	-1	-1	-1	1	-1	-1	1	-1	1	1	-1	1	-1	-1	1	-1	-1	-1	-1	1	1	1	1	-1	-1	-1	-1	1	-1	-1	1	-1	-1	-1
1	-1	-1	-1	-1	1	1	1	-1	1	1	1	-1	1	1	-1	-1	-1	-1	1	-1	-1	1	-1	1	1	-1	1	-1	-1	1	-1	-1	-1	-1	1	1	1	1	-1	-1	-1	-1	1	-1	-1	1	-1	-1	-1
1	-1	-1	-1	-1	0	1	1	0	0	0	1	-1	1	0	1	1	1	-1	1	1	1	-1	1	1	-1	1	-1	-1	-1	1	-1	-1	-1	-1	1	1	1	1	-1	-1	-1	-1	1	-1	-1	1	-1	-1	-1
1	-1	-1	-1	-1	1	1	1	-1	1	1	1	-1	1	-1	1	1	1	-1	1	1	1	-1	1	1	-1	1	-1	-1	-1	1	-1	-1	-1	-1	1	1	1	1	-1	-1	-1	-1	1	-1	-1	1	-1	-1	-1
1	-1	-1	-1	-1	1	1	1	-1	1	1	1	-1	1	-1	-1	-1	-1	-1	1	-1	-1	1	-1	1	1	-1	1	-1	-1	1	-1	-1	-1	-1	1	-1	-1	-1	1	1	1	1	1	1	1	-1	1	1	-1
1	-1	-1	-1	-1	1	1	1	-1	1	1	1	-1	1	1	-1	-1	-1	-1	1	-1	-1	1	-1	1	1	-1	1	-1	-1	-1	-1	-1	-1	-1	1	1	1	1	-1	-1	-1	-1	1	-1	-1	1	-1	-1	-1
1	-1	-1	-1	-1	1	1	1	-1	1	1	1	-1	1	-1	1	1	1	-1	1	1	1	-1	1	1	-1	1	-1	-1	-1	-1	-1	-1	-1	-1	1	-1	-1	-1	1	0	1	1	1	1	1	-1	1	1	-1
1	-1	-1	-1	-1	1	1	1	-1	1	1	1	-1	1	-1	0	1	1	-1	1	1	1	-1	1	1	-1	1	-1	-1	-1	-1	-1	-1	-1	-1	1	-1	-1	-1	1	NA	1	1	1	1	1	-1	1	1	-1
1	-1	-1	-1	-1	0	1	1	0	0	0	1	-1	1	1	-1	-1	-1	-1	1	-1	-1	1	-1	1	1	NA	0	-1	-1	-1	-1	-1	-1	-1	1	1	1	1	-1	-1	-1	-1	1	-1	-1	1	-1	-1	-1
1	-1	-1	-1	-1	-1	1	1	1	-1	-1	1	-1	1	1	-1	-1	-1	-1	1	-1	-1	1	-1	1	1	-1	1	-1	-1	1	-1	-1	-1	-1	1	1	1	1	-1	-1	-1	-1	1	-1	-1	1	-1	-1	-1
1	-1	-1	-1	-1	-1	1	1	1	-1	-1	1	-1	1	1	-1	-1	-1	-1	1	-1	-1	1	-1	1	1	-1	1	-1	-1	1	-1	-1	-1	-1	1	1	1	1	-1	-1	-1	-1	1	-1	-1	1	-1	-1	-1
1	-1	-1	-1	-1	-1	1	1	1	-1	-1	1	-1	1	1	-1	-1	-1	-1	1	-1	-1	1	-1	1	1	-1	1	-1	-1	-1	-1	-1	-1	-1	1	1	1	1	-1	-1	-1	-1	1	-1	-1	1	-1	-1	-1
1	-1	-1	-1	-1	-1	1	1	1	-1	-1	1	-1	1	1	-1	-1	1	-1	1	1	1	-1	1	1	-1	1	-1	-1	-1	1	-1	-1	-1	-1	1	1	1	1	-1	-1	-1	-1	1	-1	-1	1	-1	-1	-1
1	-1	-1	-1	-1	1	1	1	-1	-1	-1	1	-1	1	1	-1	-1	-1	-1	1	-1	-1	1	-1	1	1	-1	1	-1	-1	-1	-1	-1	-1	-1	1	1	1	1	-1	-1	-1	-1	1	-1	-1	1	-1	-1	-1
1	-1	-1	-1	-1	1	1	1	-1	-1	-1	1	-1	1	1	-1	-1	-1	-1	1	-1	-1	1	-1	1	1	-1	1	-1	-1	-1	-1	-1	-1	-1	1	1	1	1	-1	-1	-1	-1	1	-1	-1	1	-1	-1	-1
1	-1	-1	-1	-1	1	1	1	-1	1	1	1	-1	1	-1	1	1	1	-1	1	1	1	-1	1	1	-1	1	-1	-1	-1	-1	1	1	-1	-1	1	1	1	1	-1	-1	-1	-1	1	-1	-1	1	-1	-1	-1
1	-1	-1	-1	-1	-1	1	1	1	-1	-1	1	-1	1	1	-1	-1	-1	-1	1	-1	-1	1	-1	1	1	-1	1	-1	-1	0	1	1	-1	-1	1	1	1	1	-1	-1	-1	-1	1	-1	-1	1	-1	-1	-1
1	-1	-1	-1	-1	1	1	1	-1	1	1	1	-1	1	-1	1	1	1	-1	1	1	1	-1	1	1	-1	1	-1	-1	-1	-1	1	1	-1	-1	1	1	1	1	-1	-1	-1	-1	1	-1	-1	1	-1	-1	-1
1	-1	-1	-1	-1	1	1	1	-1	1	1	1	-1	1	-1	1	1	1	-1	1	1	1	-1	1	1	-1	1	-1	-1	-1	-1	-1	-1	-1	-1	1	1	1	1	-1	-1	-1	-1	1	-1	-1	1	-1	-1	-1
1	-1	-1	-1	-1	1	1	1	-1	1	1	1	-1	1	-1	1	1	0	-1	1	0	0	0	0	1	0	0	0	-1	-1	-1	-1	-1	-1	-1	1	1	1	1	-1	-1	-1	-1	1	-1	-1	1	-1	-1	-1
1	-1	-1	-1	-1	1	1	1	-1	1	1	1	-1	1	-1	1	1	0	-1	1	-1	-1	1	-1	1	1	-1	1	-1	-1	1	-1	-1	-1	-1	1	1	1	1	-1	-1	-1	-1	1	-1	-1	1	-1	-1	-1
1	-1	-1	-1	-1	-1	1	1	1	-1	-1	1	-1	1	-1	0	1	1	-1	1	1	1	-1	1	1	-1	NA	-1	-1	-1	1	-1	-1	-1	-1	1	1	1	1	-1	-1	-1	-1	1	-1	-1	1	-1	-1	-1
1	-1	-1	-1	-1	1	1	1	-1	1	1	1	-1	1	-1	1	1	0	-1	1	0	0	NA	0	1	0	NA	0	-1	-1	0	0	0	-1	-1	1	1	1	1	-1	-1	-1	-1	1	-1	-1	1	-1	-1	-1
1	-1	-1	-1	-1	1	1	1	-1	1	1	1	-1	1	NA	-1	-1	-1	-1	1	NA	NA	NA	-1	1	NA	-1	NA	-1	-1	0	-1	-1	-1	-1	1	1	1	1	-1	-1	-1	-1	1	-1	-1	1	-1	-1	-1
1	-1	-1	-1	-1	0	1	1	0	1	1	1	-1	1	-1	-1	-1	NA	-1	1	NA	NA	0	NA	1	0	1	-1	-1	-1	0	-1	-1	-1	-1	1	1	1	1	-1	-1	-1	-1	1	-1	-1	1	-1	-1	-1
1	-1	-1	-1	-1	-1	1	1	1	-1	-1	1	-1	1	-1	1	1	1	-1	1	1	1	-1	1	1	-1	1	-1	-1	-1	-1	-1	-1	-1	-1	1	0	NA	0	0	NA	-1	-1	1	0	0	NA	0	-1	-1
1	-1	-1	-1	-1	1	1	1	-1	1	1	1	-1	1	-1	NA	1	1	-1	1	-1	-1	1	-1	1	1	-1	1	-1	-1	-1	-1	-1	-1	-1	1	1	1	1	-1	-1	-1	-1	1	-1	-1	1	-1	-1	-1
1	-1	-1	-1	-1	0	1	1	0	0	0	1	-1	1	0	-1	-1	-1	-1	1	-1	-1	1	-1	1	0	0	-1	-1	-1	-1	1	1	-1	-1	1	1	1	1	-1	-1	-1	-1	1	-1	-1	1	-1	-1	-1
1	-1	-1	-1	-1	1	1	1	-1	1	1	1	-1	1	-1	1	1	1	-1	1	1	1	-1	1	1	-1	1	-1	-1	-1	-1	-1	-1	-1	-1	1	1	1	1	-1	-1	-1	-1	1	-1	-1	1	-1	-1	-1
1	-1	-1	-1	-1	-1	1	1	1	-1	-1	1	-1	1	1	-1	-1	-1	-1	1	-1	-1	1	-1	1	1	-1	1	-1	-1	1	-1	-1	-1	-1	1	1	1	1	-1	-1	-1	-1	1	-1	-1	1	-1	-1	-1
1	-1	-1	-1	-1	-1	1	1	1	-1	-1	1	-1	1	1	-1	-1	-1	-1	1	-1	-1	1	-1	1	1	-1	1	-1	-1	1	-1	-1	-1	-1	1	1	1	1	-1	-1	-1	-1	1	-1	-1	1	-1	-1	-1
1	-1	-1	-1	-1	-1	1	1	1	-1	-1	1	-1	1	1	-1	-1	0	-1	1	0	0	0	0	1	0	NA	0	-1	-1	1	-1	-1	-1	-1	1	1	1	1	-1	-1	-1	-1	1	-1	-1	1	-1	-1	-1
1	-1	-1	-1	-1	1	1	1	-1	1	1	1	-1	1	NA	0	0	-1	-1	1	-1	-1	1	-1	1	1	-1	1	-1	-1	0	-1	-1	-1	-1	1	NA	NA	NA	NA	0	0	0	1	NA	0	0	0	0	-1
1	-1	-1	-1	-1	-1	1	1	1	-1	-1	1	-1	1	1	-1	-1	-1	-1	1	-1	-1	1	-1	1	1	-1	1	-1	-1	1	-1	-1	-1	-1	1	1	1	1	-1	-1	-1	-1	1	-1	-1	1	-1	-1	-1
1	-1	-1	-1	-1	0	1	1	0	NA	0	1	-1	1	-1	1	1	1	-1	1	1	1	-1	1	1	-1	1	-1	-1	-1	1	-1	-1	-1	-1	1	1	1	1	-1	-1	-1	-1	1	-1	-1	1	-1	-1	-1
1	-1	-1	-1	-1	-1	1	1	1	-1	-1	1	-1	1	1	1	1	1	-1	1	1	1	-1	1	1	-1	1	-1	-1	-1	1	-1	-1	-1	-1	1	1	1	1	-1	-1	-1	-1	1	-1	-1	1	-1	-1	-1
1	-1	-1	-1	-1	1	1	1	-1	1	1	1	-1	1	-1	NA	1	1	-1	1	1	1	-1	1	1	-1	1	-1	-1	-1	-1	-1	-1	-1	-1	1	1	1	1	-1	-1	-1	-1	1	-1	-1	1	-1	-1	-1
1	-1	-1	-1	-1	1	1	1	-1	1	1	1	-1	1	0	0	1	1	-1	1	1	1	-1	1	1	-1	NA	-1	-1	-1	1	-1	-1	-1	-1	1	-1	-1	-1	1	1	1	1	1	1	1	-1	1	1	-1
1	-1	-1	-1	-1	0	1	1	0	0	0	1	-1	1	0	-1	1	1	-1	1	1	1	-1	1	1	-1	1	-1	-1	-1	-1	-1	-1	-1	-1	1	1	1	1	-1	-1	-1	1	1	1	1	-1	1	1	-1
1	-1	-1	-1	-1	1	1	1	-1	1	1	1	-1	1	-1	1	1	1	-1	1	1	1	-1	1	1	-1	1	-1	-1	-1	-1	-1	-1	-1	-1	1	1	1	1	-1	-1	-1	-1	1	-1	-1	1	-1	-1	-1
1	-1	-1	-1	-1	1	1	1	-1	1	1	1	-1	1	-1	1	1	1	-1	1	1	1	-1	1	1	-1	1	-1	-1	-1	-1	-1	-1	-1	-1	1	1	1	1	-1	-1	-1	-1	1	-1	-1	1	-1	-1	-1
1	-1	-1	-1	-1	1	1	1	-1	1	1	1	-1	1	-1	-1	-1	-1	-1	1	-1	-1	1	-1	1	1	-1	1	-1	-1	1	-1	-1	-1	-1	1	1	1	1	-1	-1	-1	-1	1	-1	-1	1	-1	-1	-1
1	-1	-1	-1	-1	1	1	1	-1	1	1	1	-1	1	-1	1	1	1	-1	1	1	1	-1	1	1	-1	1	-1	-1	-1	-1	-1	-1	-1	-1	1	1	1	1	-1	-1	-1	-1	1	-1	-1	1	-1	-1	-1
1	-1	-1	-1	-1	1	1	1	-1	1	1	1	-1	1	-1	1	1	1	-1	1	1	1	-1	1	1	-1	1	-1	-1	-1	-1	1	1	-1	-1	1	1	1	1	-1	-1	-1	-1	1	-1	-1	1	-1	-1	-1
1	-1	-1	-1	-1	-1	1	1	1	-1	-1	1	-1	1	1	-1	-1	1	-1	1	1	1	-1	1	1	-1	1	-1	-1	-1	NA	1	1	-1	-1	1	1	1	1	-1	-1	-1	-1	1	-1	-1	1	-1	-1	-1
1	-1	-1	-1	-1	-1	1	1	1	-1	-1	1	-1	1	1	-1	-1	-1	-1	1	-1	-1	1	-1	1	1	-1	1	-1	-1	1	-1	-1	-1	-1	1	1	1	1	-1	-1	-1	-1	1	-1	-1	1	-1	-1	-1
1	-1	-1	-1	-1	1	1	1	-1	1	1	1	-1	1	-1	1	1	1	-1	1	1	1	-1	1	1	-1	1	-1	-1	-1	-1	-1	-1	-1	-1	1	1	1	1	-1	-1	-1	-1	1	-1	-1	1	-1	-1	-1
1	-1	-1	-1	-1	-1	1	1	1	-1	-1	1	-1	1	1	-1	-1	-1	-1	1	-1	-1	1	-1	1	1	-1	1	-1	-1	1	-1	-1	-1	-1	1	-1	-1	-1	1	1	1	1	1	1	1	-1	1	1	-1
1	-1	-1	-1	-1	-1	NA	1	1	-1	-1	1	-1	NA	1	-1	-1	-1	-1	NA	-1	-1	1	-1	NA	1	-1	NA	-1	-1	1	-1	-1	-1	-1	1	1	NA	1	-1	-1	-1	-1	NA	-1	NA	NA	-1	-1	-1
1	-1	-1	-1	-1	-1	1	1	NA	0	0	1	-1	1	NA	-1	-1	-1	-1	1	-1	-1	NA	-1	1	NA	-1	1	-1	-1	NA	-1	-1	-1	-1	1	1	1	1	-1	-1	-1	-1	1	-1	-1	1	-1	-1	-1
1	-1	-1	-1	-1	0	1	1	0	-1	-1	1	-1	1	1	-1	-1	-1	-1	1	-1	-1	1	-1	1	1	-1	1	-1	-1	1	-1	-1	-1	-1	1	1	1	1	-1	-1	-1	-1	1	-1	-1	1	-1	-1	-1
1	-1	-1	-1	-1	1	1	1	-1	1	1	1	-1	1	-1	1	1	0	-1	1	0	0	0	0	1	-1	1	-1	-1	-1	-1	-1	-1	-1	-1	1	1	1	1	-1	-1	-1	-1	1	-1	-1	1	-1	-1	-1
1	-1	-1	-1	-1	1	1	1	-1	1	1	1	-1	1	-1	1	1	1	-1	1	1	1	-1	1	1	-1	1	-1	-1	-1	-1	-1	-1	-1	-1	1	1	1	1	-1	-1	-1	-1	1	-1	-1	1	-1	-1	-1
1	-1	-1	-1	-1	1	1	1	-1	1	1	1	-1	1	-1	1	1	1	-1	1	1	1	-1	1	1	-1	1	-1	-1	-1	-1	-1	-1	-1	-1	1	1	1	1	-1	-1	-1	-1	1	-1	-1	1	-1	-1	-1
1	-1	-1	-1	-1	1	1	1	-1	1	1	1	-1	1	-1	1	1	-1	-1	1	-1	-1	1	-1	1	1	-1	1	-1	-1	1	-1	-1	1	1	-1	-1	-1	-1	1	-1	-1	-1	1	-1	-1	1	-1	-1	-1
1	-1	-1	-1	-1	1	1	1	-1	1	1	1	-1	1	-1	1	1	-1	-1	1	-1	-1	1	-1	1	1	-1	1	-1	-1	-1	-1	-1	-1	-1	1	1	1	1	-1	-1	-1	-1	1	-1	-1	1	-1	-1	-1
1	-1	-1	-1	-1	1	1	1	-1	1	1	1	-1	1	-1	1	1	-1	-1	1	-1	-1	1	-1	1	1	-1	1	-1	-1	1	-1	-1	1	1	-1	-1	-1	-1	1	NA	0	0	0	-1	-1	1	-1	-1	-1
1	-1	-1	-1	-1	1	1	1	-1	1	1	1	-1	1	-1	1	1	1	-1	1	1	1	-1	1	1	-1	1	-1	-1	-1	-1	1	1	0	0	0	0	0	0	0	NA	0	0	-1	-1	-1	1	-1	-1	-1
1	-1	-1	-1	-1	1	1	1	-1	1	1	1	-1	1	-1	1	1	-1	-1	1	-1	-1	1	-1	1	1	-1	1	-1	-1	-1	-1	-1	-1	-1	1	1	1	1	-1	-1	-1	-1	1	-1	-1	1	-1	-1	-1
1	-1	-1	-1	-1	1	1	1	-1	1	1	1	-1	1	-1	1	1	-1	-1	1	-1	-1	1	-1	1	1	-1	1	-1	-1	1	-1	-1	1	1	-1	-1	-1	-1	1	1	1	1	-1	-1	-1	1	-1	-1	-1
1	-1	-1	-1	-1	1	1	1	-1	1	1	1	-1	1	-1	1	1	1	-1	1	1	1	-1	1	1	-1	1	-1	-1	-1	-1	-1	-1	0	0	0	0	0	-1	1	1	1	1	-1	-1	-1	1	-1	-1	-1
1	-1	-1	-1	-1	1	1	1	-1	1	1	1	-1	1	-1	-1	-1	-1	-1	1	-1	-1	1	-1	1	1	-1	1	-1	-1	1	-1	-1	1	1	-1	-1	-1	-1	1	-1	-1	-1	1	-1	-1	1	-1	-1	-1
1	-1	-1	-1	-1	1	1	1	-1	1	1	1	-1	1	-1	1	1	1	-1	1	1	1	-1	1	1	-1	1	1	-1	-1	1	-1	-1	-1	-1	1	1	1	1	-1	-1	-1	-1	1	-1	-1	1	-1	-1	-1
1	-1	-1	-1	-1	1	1	1	-1	1	1	1	-1	1	-1	-1	-1	-1	-1	1	-1	-1	1	-1	1	1	-1	1	-1	-1	1	-1	-1	1	1	-1	-1	-1	-1	1	-1	-1	-1	1	-1	-1	1	-1	-1	-1
1	-1	-1	-1	-1	1	1	1	-1	1	1	1	-1	1	-1	1	1	-1	-1	1	-1	-1	1	-1	1	1	-1	1	-1	-1	1	-1	-1	1	1	1	1	1	1	-1	-1	-1	-1	1	-1	-1	1	-1	-1	-1
1	-1	-1	-1	-1	1	1	1	-1	1	1	1	-1	1	-1	0	NA	1	-1	1	1	1	-1	1	1	-1	1	-1	-1	-1	1	NA	-1	-1	-1	1	1	-1	-1	1	0	1	1	-1	-1	-1	1	-1	-1	-1
1	-1	-1	-1	-1	1	1	1	-1	1	1	1	-1	1	-1	1	1	1	-1	1	1	NA	-1	1	1	-1	1	-1	-1	-1	NA	0	1	1	1	NA	-1	-1	-1	1	0	1	1	-1	-1	-1	1	-1	-1	-1
1	-1	-1	-1	-1	1	1	1	-1	1	1	1	-1	1	-1	1	1	-1	-1	1	-1	-1	1	-1	1	1	-1	1	-1	-1	1	-1	-1	0	0	0	0	0	0	0	NA	0	0	0	-1	-1	1	-1	-1	-1
1	-1	-1	-1	-1	1	1	1	-1	1	1	1	-1	1	-1	1	1	-1	-1	1	-1	-1	1	-1	1	1	-1	1	-1	-1	1	-1	-1	1	1	-1	-1	-1	-1	1	1	1	1	-1	-1	-1	1	-1	-1	-1
1	-1	-1	-1	-1	1	1	1	-1	1	1	1	-1	1	-1	1	1	-1	-1	1	-1	-1	1	-1	1	1	-1	1	-1	-1	-1	-1	-1	-1	-1	1	1	1	1	-1	-1	-1	-1	1	-1	-1	1	-1	-1	-1
1	-1	-1	-1	-1	1	1	1	-1	1	1	1	-1	1	-1	1	1	-1	-1	1	-1	-1	1	-1	1	1	-1	1	-1	-1	1	-1	-1	1	1	-1	-1	-1	-1	1	1	1	1	-1	-1	-1	1	-1	-1	-1
1	-1	-1	-1	-1	1	1	1	-1	1	1	1	-1	1	-1	1	1	1	-1	1	1	1	-1	1	1	-1	1	-1	-1	-1	-1	1	1	-1	-1	1	1	1	1	-1	-1	-1	-1	-1	-1	-1	1	-1	-1	-1
1	-1	-1	-1	-1	1	1	1	-1	1	1	1	-1	1	-1	1	1	1	-1	1	1	1	-1	1	1	-1	1	-1	-1	-1	1	-1	-1	1	1	-1	-1	-1	-1	1	1	1	1	-1	-1	-1	1	-1	-1	-1
1	-1	-1	-1	-1	1	1	1	-1	1	1	1	-1	1	-1	NA	1	-1	-1	1	-1	-1	1	-1	1	1	-1	1	-1	-1	1	-1	-1	1	1	-1	-1	-1	-1	1	NA	1	1	-1	-1	-1	1	-1	-1	-1
1	-1	-1	-1	-1	1	1	1	-1	1	1	1	-1	1	-1	1	1	1	-1	1	1	1	-1	1	1	-1	1	-1	-1	-1	1	-1	-1	1	1	-1	-1	-1	-1	1	1	1	1	-1	-1	-1	1	-1	-1	-1
1	-1	-1	-1	-1	1	1	1	-1	1	1	1	-1	1	-1	1	1	1	-1	1	1	1	-1	1	1	-1	1	-1	-1	-1	-1	1	1	-1	-1	1	1	1	1	-1	-1	-1	-1	1	-1	-1	1	-1	-1	-1
1	-1	-1	-1	-1	1	1	1	-1	1	1	1	-1	1	-1	1	1	1	-1	1	1	1	-1	1	1	-1	1	-1	-1	-1	-1	-1	-1	-1	1	-1	-1	-1	-1	1	1	1	1	-1	-1	-1	1	-1	-1	-1
1	-1	-1	-1	-1	1	1	1	-1	1	1	1	-1	1	-1	1	1	1	-1	1	1	1	-1	1	1	-1	1	-1	-1	-1	1	-1	-1	-1	-1	-1	-1	-1	-1	1	1	1	1	-1	-1	-1	1	-1	-1	-1
1	-1	-1	-1	-1	1	1	1	-1	1	1	1	-1	1	-1	1	1	-1	-1	1	-1	-1	1	-1	1	1	-1	1	-1	-1	-1	-1	-1	0	0	0	0	1	1	-1	-1	-1	-1	1	-1	-1	1	-1	-1	-1
1	-1	-1	-1	-1	1	1	1	-1	1	1	1	-1	1	-1	1	1	1	-1	1	1	1	-1	1	1	-1	1	-1	-1	-1	-1	-1	-1	-1	-1	1	1	1	1	-1	-1	-1	-1	1	-1	-1	1	-1	-1	-1
1	-1	-1	-1	-1	1	1	1	-1	1	1	1	-1	1	-1	-1	-1	-1	-1	1	-1	-1	1	-1	1	1	-1	1	-1	-1	1	-1	-1	1	1	-1	-1	-1	-1	1	-1	-1	-1	1	-1	-1	1	-1	-1	-1
1	-1	-1	-1	-1	1	1	1	-1	1	1	1	-1	1	-1	1	1	0	-1	1	-1	-1	1	-1	1	1	-1	1	-1	-1	0	-1	-1	0	0	0	0	0	0	0	NA	0	0	-1	-1	-1	1	-1	-1	-1
1	-1	-1	-1	-1	1	1	1	-1	1	1	1	-1	1	-1	1	1	-1	-1	1	-1	-1	1	-1	1	1	-1	1	-1	-1	1	-1	-1	1	1	-1	-1	-1	-1	1	1	1	1	-1	-1	-1	1	-1	-1	-1
1	-1	-1	-1	-1	1	1	1	-1	1	1	1	-1	1	-1	1	1	1	-1	1	1	1	-1	1	1	-1	1	-1	-1	-1	-1	-1	-1	-1	-1	1	1	1	1	-1	-1	-1	-1	1	-1	-1	1	-1	-1	-1
1	-1	-1	-1	-1	1	1	1	-1	1	1	1	-1	1	-1	1	1	-1	-1	1	-1	-1	1	-1	1	1	-1	1	-1	-1	1	-1	-1	1	1	-1	-1	-1	-1	1	1	1	1	1	-1	-1	1	-1	-1	-1
1	-1	-1	-1	-1	1	1	1	-1	1	1	1	-1	1	-1	1	1	1	-1	1	1	1	-1	1	1	-1	1	-1	-1	-1	1	-1	-1	-1	-1	1	1	1	1	-1	-1	-1	-1	1	-1	-1	1	-1	-1	-1
1	-1	-1	-1	-1	1	1	1	-1	1	1	1	-1	1	-1	1	1	1	-1	1	1	1	-1	1	1	-1	1	-1	-1	-1	-1	-1	-1	-1	-1	1	1	1	1	-1	-1	-1	-1	1	-1	-1	1	-1	-1	-1
1	-1	-1	-1	-1	1	1	1	-1	1	1	1	-1	1	-1	1	1	-1	-1	1	-1	-1	1	-1	1	1	-1	1	-1	-1	1	-1	-1	1	1	-1	-1	-1	-1	1	-1	-1	-1	1	-1	-1	1	-1	-1	-1
1	-1	-1	-1	-1	1	1	1	-1	1	1	1	-1	1	-1	1	1	1	-1	1	1	1	-1	1	1	-1	1	-1	-1	-1	-1	-1	-1	-1	-1	1	1	1	1	-1	-1	-1	-1	1	-1	-1	1	-1	-1	-1
1	-1	-1	-1	-1	1	1	1	-1	1	1	1	-1	1	-1	1	1	1	-1	1	1	1	-1	1	1	-1	1	-1	-1	-1	-1	-1	-1	-1	-1	1	1	1	1	-1	-1	-1	-1	1	-1	-1	1	-1	-1	-1
1	-1	-1	-1	-1	1	1	1	-1	1	1	1	-1	1	-1	1	1	-1	-1	1	-1	-1	1	-1	1	1	-1	1	-1	-1	1	-1	-1	1	1	-1	-1	-1	-1	1	1	1	1	-1	-1	-1	1	-1	-1	-1
1	-1	-1	-1	-1	1	1	1	-1	1	1	1	-1	1	-1	1	1	1	-1	1	1	1	-1	1	1	-1	1	-1	-1	-1	NA	-1	-1	1	1	-1	-1	-1	-1	1	1	1	1	-1	-1	-1	1	-1	-1	-1
1	-1	-1	-1	-1	1	1	1	-1	1	1	1	-1	1	-1	1	1	-1	-1	1	-1	-1	1	-1	1	1	-1	1	-1	-1	1	-1	-1	1	1	-1	-1	-1	-1	1	1	1	1	-1	-1	-1	1	-1	-1	-1
1	-1	-1	-1	-1	1	1	1	-1	1	1	1	-1	1	-1	1	1	-1	-1	1	-1	-1	1	-1	1	1	-1	1	-1	-1	1	-1	-1	1	1	-1	-1	-1	-1	1	1	1	1	-1	-1	-1	1	-1	-1	-1
1	-1	-1	-1	-1	1	1	1	-1	1	1	1	-1	1	-1	1	1	-1	-1	1	-1	-1	1	-1	1	1	-1	1	-1	-1	1	-1	-1	1	1	-1	-1	-1	-1	1	0	0	0	-1	-1	-1	1	-1	-1	-1
1	-1	-1	-1	-1	1	1	1	-1	1	1	1	-1	1	-1	1	1	1	-1	1	1	1	-1	1	1	-1	1	-1	-1	-1	NA	-1	-1	NA	0	-1	-1	-1	-1	1	1	1	1	-1	-1	-1	1	-1	-1	-1
1	-1	-1	-1	-1	1	1	1	-1	1	1	1	-1	1	-1	1	1	1	-1	1	1	1	-1	1	1	-1	1	-1	-1	-1	1	-1	-1	1	1	-1	-1	-1	-1	1	1	1	1	-1	-1	-1	1	-1	-1	-1
1	-1	-1	-1	-1	1	1	1	-1	1	1	1	-1	1	-1	1	1	0	-1	1	0	0	0	0	1	0	0	0	-1	-1	-1	-1	-1	-1	-1	1	1	1	1	-1	-1	-1	-1	1	-1	-1	1	-1	-1	-1
1	-1	-1	-1	-1	1	1	1	-1	1	1	1	-1	1	-1	1	1	1	-1	1	1	1	-1	1	1	0	0	0	-1	-1	0	-1	-1	0	0	0	0	0	0	0	0	0	0	0	-1	-1	1	-1	-1	-1
1	-1	-1	-1	-1	1	1	1	-1	1	1	1	-1	1	-1	-1	-1	-1	-1	1	-1	-1	1	-1	1	1	-1	1	-1	-1	1	-1	-1	1	1	-1	-1	-1	-1	1	-1	-1	-1	1	-1	-1	1	-1	-1	-1
1	-1	-1	-1	-1	1	1	1	-1	1	1	1	-1	1	-1	1	1	1	-1	1	1	1	-1	1	1	-1	1	-1	-1	-1	1	-1	-1	1	1	-1	-1	-1	-1	1	1	1	1	0	-1	-1	1	-1	-1	-1
1	-1	-1	-1	-1	1	1	1	-1	1	1	1	-1	1	-1	1	1	-1	-1	1	-1	-1	1	-1	1	1	-1	1	-1	-1	1	-1	-1	-1	-1	-1	-1	-1	-1	1	1	1	1	-1	-1	-1	1	-1	-1	-1
1	-1	-1	-1	-1	1	1	1	-1	1	1	1	-1	1	-1	-1	-1	-1	-1	1	-1	-1	1	-1	1	1	-1	1	-1	-1	1	-1	-1	1	1	-1	-1	-1	-1	1	-1	-1	-1	1	-1	-1	1	-1	-1	-1
1	-1	-1	-1	-1	1	1	1	-1	1	1	1	-1	1	-1	1	1	-1	-1	1	-1	-1	1	-1	1	1	-1	1	-1	-1	NA	NA	0	-1	-1	1	1	1	1	-1	-1	-1	-1	1	-1	-1	1	-1	-1	-1
1	-1	-1	-1	-1	1	1	1	-1	1	1	1	-1	1	-1	1	1	1	-1	1	1	1	-1	1	1	-1	1	-1	-1	-1	1	-1	-1	-1	-1	1	1	1	1	-1	-1	-1	-1	1	-1	-1	1	-1	-1	-1
1	-1	-1	-1	-1	1	1	1	-1	1	1	1	-1	1	-1	-1	-1	-1	-1	1	-1	-1	1	-1	1	1	-1	1	-1	-1	1	-1	-1	1	1	-1	-1	-1	-1	1	-1	-1	-1	1	-1	-1	1	-1	-1	-1
1	-1	-1	-1	-1	1	1	1	-1	1	1	1	-1	1	-1	0	0	-1	-1	1	-1	-1	1	-1	1	1	-1	1	-1	-1	1	-1	-1	1	1	-1	-1	-1	-1	1	-1	-1	-1	1	-1	-1	1	-1	-1	-1
1	-1	-1	-1	-1	1	1	1	-1	1	1	1	-1	1	-1	1	1	-1	-1	1	-1	-1	1	-1	1	1	-1	1	-1	-1	-1	-1	-1	-1	-1	1	-1	-1	-1	1	0	0	NA	0	-1	-1	1	-1	-1	-1
1	-1	-1	-1	-1	1	1	1	-1	1	1	1	-1	1	-1	1	1	1	-1	1	0	0	0	0	1	0	0	0	-1	-1	1	-1	-1	1	1	-1	-1	-1	-1	1	0	1	1	-1	-1	-1	1	-1	-1	-1
1	-1	-1	-1	-1	1	1	1	-1	1	1	1	-1	1	-1	NA	0	-1	-1	1	-1	-1	1	-1	1	1	-1	1	-1	-1	1	-1	-1	1	1	-1	-1	-1	-1	1	-1	-1	-1	1	-1	-1	1	-1	-1	-1
1	-1	-1	-1	-1	1	1	1	-1	1	1	1	-1	1	-1	1	1	-1	-1	1	-1	-1	1	-1	1	1	-1	1	-1	-1	1	-1	-1	1	1	-1	-1	-1	-1	1	-1	-1	-1	1	-1	-1	1	-1	-1	-1
1	-1	-1	-1	-1	1	1	1	-1	1	1	1	-1	1	-1	1	1	1	-1	1	1	1	-1	1	1	-1	1	-1	-1	-1	-1	-1	-1	-1	-1	1	1	1	1	-1	-1	-1	-1	-1	-1	-1	1	-1	-1	-1
1	-1	-1	-1	-1	1	1	1	-1	1	1	1	-1	1	-1	1	1	-1	-1	1	-1	NA	NA	-1	1	NA	-1	NA	-1	-1	NA	-1	-1	1	1	NA	-1	-1	-1	1	0	1	1	-1	-1	-1	1	-1	-1	-1
1	-1	-1	-1	-1	1	1	1	-1	1	1	1	-1	1	-1	1	1	1	-1	1	1	1	-1	1	1	1	-1	1	-1	-1	1	-1	-1	-1	-1	1	1	1	1	-1	-1	-1	-1	1	-1	-1	1	-1	-1	-1
1	-1	-1	-1	-1	1	1	1	-1	1	1	1	-1	1	-1	1	1	0	-1	1	0	0	0	0	1	0	0	0	-1	-1	-1	-1	-1	1	1	-1	-1	-1	-1	1	1	1	1	-1	-1	-1	1	-1	-1	-1
1	-1	-1	-1	-1	1	1	1	-1	1	1	1	-1	1	-1	1	1	-1	-1	1	-1	-1	1	-1	1	1	-1	1	-1	-1	1	-1	-1	1	1	-1	-1	-1	-1	1	1	1	1	-1	-1	-1	1	-1	-1	-1
1	-1	-1	-1	-1	1	1	1	-1	1	1	1	-1	1	-1	1	1	1	-1	1	1	1	-1	1	1	-1	1	-1	-1	-1	-1	-1	-1	1	1	-1	-1	-1	-1	1	1	1	1	-1	-1	-1	1	-1	-1	-1
1	-1	-1	-1	-1	1	1	1	-1	1	1	1	-1	1	-1	1	1	1	-1	1	1	1	-1	1	1	-1	1	-1	-1	-1	1	-1	-1	-1	-1	1	1	1	1	-1	-1	-1	-1	1	-1	-1	1	-1	-1	-1
1	-1	-1	-1	-1	1	1	1	-1	1	1	1	-1	1	-1	1	1	1	-1	1	1	1	-1	1	1	-1	1	-1	-1	-1	0	-1	-1	-1	-1	1	1	1	1	-1	-1	-1	-1	1	-1	-1	1	-1	-1	-1
1	-1	-1	-1	-1	1	1	1	-1	1	1	1	-1	1	-1	1	1	-1	-1	1	-1	-1	1	-1	1	1	-1	1	-1	-1	NA	-1	-1	-1	-1	1	1	1	1	-1	-1	-1	-1	1	-1	-1	1	-1	-1	-1
1	-1	-1	-1	-1	1	1	1	-1	1	1	1	-1	1	-1	1	1	1	-1	1	1	1	-1	1	1	1	-1	1	-1	-1	1	-1	-1	-1	-1	1	1	1	1	-1	-1	-1	-1	1	-1	-1	1	-1	-1	-1
1	-1	-1	-1	-1	1	1	1	-1	1	1	1	-1	1	-1	-1	-1	-1	-1	1	-1	-1	1	-1	1	1	-1	1	-1	-1	1	-1	-1	1	1	-1	-1	-1	-1	1	1	1	1	-1	-1	-1	1	-1	-1	-1
1	-1	-1	-1	-1	1	1	1	-1	1	1	1	-1	1	-1	1	1	-1	-1	1	-1	-1	1	-1	1	1	-1	1	-1	-1	1	-1	-1	1	1	-1	-1	-1	-1	1	1	1	1	-1	-1	-1	1	-1	-1	-1
1	-1	-1	-1	-1	1	1	1	-1	1	1	1	-1	1	-1	1	1	1	-1	1	1	1	-1	1	1	-1	1	-1	-1	-1	-1	-1	-1	1	1	-1	-1	-1	-1	1	1	1	1	-1	-1	-1	1	-1	-1	-1
1	-1	-1	-1	-1	1	1	1	-1	1	1	1	-1	1	-1	1	1	1	-1	1	1	1	-1	1	1	-1	1	-1	-1	-1	0	-1	-1	-1	-1	1	1	1	1	-1	NA	-1	-1	1	-1	-1	1	-1	-1	-1
1	-1	-1	-1	-1	1	1	1	-1	1	1	1	-1	1	-1	1	1	-1	-1	1	-1	-1	1	-1	1	1	-1	1	-1	-1	1	-1	-1	1	1	-1	-1	-1	-1	1	1	1	1	-1	-1	-1	1	-1	-1	-1
1	-1	-1	-1	-1	1	1	1	-1	1	1	1	-1	1	-1	1	1	1	-1	1	1	1	-1	1	1	-1	1	-1	-1	-1	-1	-1	-1	-1	-1	1	1	1	1	-1	-1	-1	-1	1	-1	-1	1	-1	-1	-1
1	-1	-1	-1	-1	1	1	1	-1	1	1	1	-1	1	-1	1	1	-1	-1	1	-1	-1	1	-1	1	1	-1	1	-1	-1	-1	-1	-1	1	1	-1	-1	-1	-1	1	1	1	1	-1	-1	-1	1	-1	-1	-1
1	-1	-1	-1	-1	1	1	1	-1	1	1	1	-1	1	-1	1	1	1	-1	1	1	1	-1	1	1	-1	1	-1	-1	-1	NA	-1	-1	1	1	NA	-1	-1	-1	1	NA	1	1	-1	-1	-1	1	-1	-1	-1
1	-1	-1	-1	-1	1	1	1	-1	1	1	1	-1	1	-1	1	1	1	-1	1	1	1	-1	1	1	-1	1	-1	-1	-1	1	-1	-1	0	0	-1	-1	-1	-1	1	1	1	1	-1	-1	-1	1	-1	-1	-1
1	-1	-1	-1	-1	1	1	1	-1	1	1	1	-1	1	-1	1	1	1	-1	1	1	1	-1	1	1	-1	1	-1	-1	-1	-1	-1	-1	1	1	-1	-1	-1	-1	1	1	1	1	-1	-1	-1	1	-1	-1	-1
1	-1	-1	-1	-1	1	1	1	-1	1	1	1	-1	1	-1	1	1	-1	-1	1	-1	-1	1	-1	1	1	-1	1	-1	-1	0	-1	-1	-1	-1	1	1	1	1	-1	-1	-1	-1	1	-1	-1	1	-1	-1	-1
1	-1	-1	-1	-1	1	1	1	-1	1	1	1	-1	1	-1	1	1	1	-1	1	1	1	-1	1	1	-1	1	-1	-1	-1	1	-1	-1	1	1	-1	-1	-1	-1	1	1	1	1	-1	-1	-1	1	-1	-1	-1
-1	-1	-1	-1	-1	1	-1	-1	1	1	NA	1	-1	1	1	-1	-1	-1	-1	1	-1	1	-1	1	-1	-1	1	-1	-1	-1	1	-1	-1	1	1	-1	-1	-1	-1	1	1	1	1	1	1	1	-1	1	1	-1
-1	-1	-1	-1	-1	1	-1	-1	1	-1	-1	1	-1	1	1	-1	-1	-1	-1	1	-1	1	-1	1	-1	-1	-1	1	-1	-1	1	-1	-1	1	1	-1	-1	-1	-1	1	1	1	1	1	1	1	-1	1	1	-1
-1	NA	-1	-1	-1	1	-1	-1	1	1	NA	1	-1	1	1	-1	-1	-1	-1	1	-1	1	-1	1	-1	-1	-1	1	-1	-1	1	-1	-1	1	1	NA	-1	-1	-1	1	0	NA	1	1	NA	1	-1	1	NA	-1
-1	-1	-1	-1	-1	1	-1	-1	1	-1	-1	1	-1	1	1	-1	-1	-1	-1	1	-1	1	-1	1	-1	-1	-1	1	-1	-1	1	-1	-1	NA	NA	NA	-1	-1	-1	1	0	NA	1	1	NA	1	-1	1	NA	-1
-1	0	-1	-1	-1	1	-1	-1	1	1	0	1	-1	1	1	-1	-1	-1	-1	1	-1	1	-1	1	-1	-1	0	-1	-1	-1	1	-1	-1	0	0	0	NA	NA	0	0	0	0	NA	1	0	NA	NA	NA	0	-1
-1	0	-1	-1	-1	1	-1	-1	1	-1	-1	1	-1	1	1	-1	-1	-1	-1	1	-1	1	-1	1	-1	-1	-1	1	-1	-1	1	-1	-1	-1	-1	1	1	1	1	-1	-1	-1	-1	1	-1	-1	1	-1	-1	-1
-1	-1	-1	-1	-1	1	-1	-1	1	-1	-1	1	-1	1	1	-1	-1	-1	-1	1	-1	1	-1	1	-1	-1	-1	1	-1	-1	1	-1	-1	1	1	-1	-1	-1	-1	1	1	1	1	1	1	1	-1	1	1	-1
-1	-1	-1	-1	-1	1	-1	-1	1	-1	-1	1	-1	1	1	-1	-1	-1	-1	1	-1	1	-1	1	-1	-1	-1	1	-1	-1	1	-1	-1	1	1	-1	-1	-1	-1	1	1	1	1	1	1	1	-1	1	1	-1
-1	-1	-1	-1	-1	1	-1	-1	1	-1	-1	1	-1	1	1	-1	-1	-1	-1	1	-1	1	-1	1	-1	-1	-1	1	-1	-1	1	-1	-1	1	1	-1	-1	-1	-1	1	1	1	1	1	1	1	-1	1	1	-1
-1	1	-1	-1	-1	1	-1	-1	1	1	1	1	-1	1	1	-1	-1	-1	-1	1	-1	1	-1	1	-1	-1	-1	1	-1	-1	1	-1	-1	1	1	-1	-1	-1	-1	1	1	1	1	1	1	1	-1	1	1	-1
-1	0	-1	-1	-1	1	-1	-1	1	0	NA	1	-1	1	1	-1	-1	-1	-1	1	-1	1	-1	1	-1	-1	NA	-1	-1	-1	1	-1	-1	1	1	-1	-1	-1	-1	1	1	1	1	1	1	1	-1	1	1	-1
-1	-1	-1	-1	-1	1	-1	-1	1	-1	-1	1	-1	1	1	-1	-1	-1	-1	1	-1	1	-1	1	-1	-1	-1	1	-1	-1	1	-1	-1	1	1	-1	-1	-1	-1	1	1	1	1	1	1	1	-1	1	1	-1
-1	-1	-1	-1	-1	1	-1	-1	1	-1	-1	1	-1	1	1	-1	-1	-1	-1	1	-1	1	-1	1	-1	-1	1	-1	-1	-1	-1	0	0	NA	0	NA	-1	-1	-1	1	1	1	1	1	1	1	-1	1	1	-1
-1	-1	-1	-1	-1	1	-1	-1	1	-1	-1	1	-1	1	1	-1	-1	-1	-1	1	-1	1	-1	1	-1	-1	-1	1	-1	-1	1	-1	-1	-1	-1	1	1	1	1	-1	-1	-1	-1	1	-1	-1	1	-1	-1	-1
-1	1	-1	-1	-1	1	-1	-1	1	1	1	1	-1	1	1	-1	-1	-1	-1	1	-1	1	-1	1	-1	-1	1	-1	-1	-1	1	-1	-1	1	1	-1	-1	-1	-1	1	1	1	1	1	1	1	-1	1	1	-1
-1	1	-1	-1	-1	1	-1	-1	1	1	NA	1	-1	1	1	-1	-1	-1	-1	1	-1	1	-1	1	-1	-1	-1	1	-1	-1	1	-1	-1	1	1	-1	-1	-1	-1	1	1	1	1	1	1	1	-1	1	1	-1
-1	-1	-1	-1	-1	NA	-1	NA	1	-1	-1	1	-1	1	1	-1	-1	-1	-1	1	-1	1	-1	1	-1	-1	-1	1	-1	-1	NA	0	0	0	0	NA	0	0	0	0	0	0	0	1	0	NA	0	0	0	-1
-1	-1	-1	-1	-1	1	-1	-1	1	-1	-1	1	-1	1	1	-1	-1	-1	-1	1	-1	1	-1	1	-1	-1	1	-1	-1	-1	1	-1	-1	-1	-1	1	1	1	1	-1	-1	-1	-1	1	-1	-1	1	-1	-1	-1
-1	1	-1	-1	-1	1	-1	-1	1	1	1	1	-1	1	1	-1	-1	-1	-1	1	-1	1	-1	1	-1	-1	-1	1	-1	-1	1	-1	-1	1	1	-1	-1	-1	1	-1	-1	-1	-1	1	-1	-1	1	-1	-1	-1
-1	0	0	0	-1	1	-1	-1	1	0	NA	1	-1	1	1	-1	-1	-1	-1	1	-1	1	-1	1	-1	-1	-1	1	-1	-1	1	-1	-1	NA	1	NA	-1	-1	-1	1	1	1	1	1	NA	1	-1	1	1	-1
-1	1	-1	-1	-1	1	-1	-1	1	1	1	1	-1	1	1	-1	-1	-1	-1	1	-1	1	-1	1	-1	-1	-1	1	-1	-1	1	-1	-1	1	1	-1	-1	-1	-1	1	1	1	1	1	-1	-1	1	-1	-1	-1
-1	-1	-1	-1	-1	1	-1	-1	1	-1	-1	1	-1	1	1	-1	-1	-1	-1	1	-1	1	-1	1	-1	-1	-1	1	-1	-1	1	-1	-1	-1	-1	1	1	1	1	-1	-1	-1	-1	1	-1	-1	1	-1	-1	-1
-1	-1	-1	-1	-1	1	-1	-1	1	-1	-1	1	-1	1	1	-1	-1	-1	-1	1	-1	1	-1	1	-1	-1	-1	1	-1	-1	1	-1	-1	1	1	-1	-1	-1	-1	1	1	1	1	1	1	1	-1	1	1	-1
-1	-1	-1	-1	-1	1	-1	-1	1	1	NA	1	-1	1	1	-1	-1	-1	-1	1	-1	1	-1	1	-1	-1	-1	1	-1	-1	1	-1	-1	1	1	-1	-1	-1	-1	1	NA	1	1	1	1	1	-1	1	1	-1
-1	-1	-1	-1	-1	1	-1	-1	1	-1	-1	1	-1	1	1	-1	-1	-1	-1	1	-1	1	-1	1	-1	-1	-1	1	-1	-1	1	-1	-1	1	1	-1	-1	-1	-1	1	1	1	1	1	1	1	-1	1	1	-1
-1	NA	-1	-1	-1	1	-1	-1	1	-1	-1	1	-1	1	1	-1	-1	-1	-1	1	-1	1	-1	1	-1	-1	-1	1	-1	-1	1	-1	-1	1	1	0	0	NA	0	0	0	0	NA	1	0	NA	NA	NA	0	-1
-1	-1	-1	-1	-1	1	-1	-1	1	-1	-1	1	-1	1	1	-1	-1	-1	-1	1	-1	1	-1	1	-1	-1	-1	1	-1	-1	1	-1	-1	NA	NA	NA	0	0	0	0	0	NA	0	1	-1	-1	1	-1	-1	-1
-1	-1	-1	-1	-1	1	-1	-1	1	-1	-1	1	-1	1	1	-1	-1	-1	-1	1	-1	1	-1	1	-1	-1	NA	-1	-1	-1	1	-1	-1	NA	1	NA	-1	-1	-1	1	NA	NA	1	1	NA	1	-1	1	NA	-1
-1	0	-1	-1	-1	1	-1	-1	1	1	0	1	-1	1	1	-1	-1	-1	-1	1	-1	1	-1	1	-1	-1	-1	1	-1	-1	1	0	NA	1	1	-1	-1	-1	-1	1	NA	1	1	1	1	1	-1	1	1	-1
-1	-1	-1	-1	-1	1	-1	-1	1	-1	-1	1	-1	1	1	-1	-1	-1	-1	1	-1	1	-1	1	-1	-1	-1	1	-1	-1	1	NA	0	1	1	-1	-1	-1	-1	1	1	1	1	1	1	1	-1	1	1	-1
-1	-1	-1	-1	-1	1	-1	-1	1	-1	-1	1	-1	1	1	-1	-1	-1	-1	1	-1	1	-1	1	-1	-1	-1	1	-1	-1	1	-1	-1	1	1	1	1	1	1	-1	-1	-1	-1	1	-1	-1	1	-1	-1	-1
-1	1	-1	-1	-1	1	-1	-1	1	1	1	1	-1	1	1	-1	-1	-1	-1	1	-1	1	-1	1	-1	-1	-1	1	-1	-1	1	-1	-1	-1	-1	1	1	1	1	-1	-1	-1	-1	1	-1	-1	1	-1	-1	-1
-1	-1	-1	-1	-1	1	-1	-1	1	-1	-1	1	-1	1	1	-1	-1	-1	-1	1	-1	1	-1	1	-1	-1	-1	1	-1	-1	1	-1	-1	1	1	-1	-1	-1	-1	1	1	1	1	1	1	1	-1	1	1	-1
-1	-1	-1	-1	-1	1	-1	-1	1	-1	-1	1	-1	1	1	-1	-1	-1	-1	1	-1	1	-1	1	-1	-1	-1	1	-1	-1	1	-1	-1	1	1	-1	-1	-1	-1	1	1	1	1	1	-1	-1	1	-1	-1	-1
-1	NA	-1	-1	-1	1	-1	-1	1	1	NA	1	-1	1	1	-1	-1	-1	-1	1	-1	1	-1	1	-1	-1	-1	1	-1	-1	1	-1	-1	1	1	-1	-1	-1	-1	1	1	1	1	1	1	1	-1	-1	-1	-1
-1	1	-1	-1	-1	1	-1	-1	1	1	1	1	-1	1	1	-1	-1	-1	-1	1	-1	1	-1	1	-1	-1	-1	1	-1	-1	1	-1	-1	1	1	-1	-1	-1	-1	1	1	1	1	1	1	-1	1	-1	-1	-1
-1	-1	-1	-1	-1	1	-1	-1	1	-1	-1	1	-1	1	1	-1	-1	-1	-1	1	-1	1	-1	1	-1	-1	-1	1	-1	-1	1	-1	-1	1	1	-1	-1	-1	-1	1	1	1	1	1	1	1	-1	1	1	-1
-1	-1	-1	-1	-1	1	-1	-1	1	-1	-1	1	-1	1	1	-1	-1	-1	-1	1	-1	1	-1	1	-1	-1	-1	1	-1	-1	1	1	1	-1	-1	1	1	1	1	-1	-1	-1	-1	1	-1	-1	1	-1	-1	-1
-1	NA	-1	-1	-1	0	0	0	1	-1	-1	1	-1	1	1	-1	-1	-1	-1	1	-1	1	-1	1	-1	-1	-1	1	NA	NA	1	-1	NA	1	1	0	NA	NA	NA	NA	0	0	NA	1	0	NA	NA	NA	0	-1
-1	-1	-1	-1	-1	1	-1	-1	1	-1	-1	1	-1	1	1	-1	-1	-1	-1	1	-1	1	-1	1	-1	-1	1	-1	-1	-1	1	-1	-1	1	1	-1	-1	-1	-1	1	1	1	1	1	-1	-1	1	-1	-1	-1
-1	1	-1	-1	-1	1	-1	-1	1	1	1	1	-1	1	1	-1	-1	-1	-1	1	-1	1	-1	1	-1	-1	1	-1	-1	-1	1	-1	-1	1	1	-1	-1	-1	-1	1	1	1	1	1	1	1	-1	1	1	-1
-1	-1	-1	-1	-1	1	-1	-1	1	-1	-1	1	-1	1	1	-1	-1	-1	-1	1	-1	1	-1	1	-1	-1	-1	1	-1	-1	1	-1	-1	1	1	-1	-1	-1	-1	1	1	1	1	1	1	1	-1	1	1	-1
-1	-1	-1	-1	-1	1	-1	-1	1	-1	-1	1	-1	1	1	-1	-1	-1	-1	1	-1	1	-1	1	-1	-1	-1	1	-1	-1	1	-1	-1	1	1	-1	-1	-1	-1	1	NA	1	1	1	1	1	-1	1	1	-1
-1	1	-1	-1	-1	1	-1	-1	1	1	1	1	-1	1	1	-1	-1	-1	-1	1	-1	1	-1	1	-1	-1	1	-1	-1	-1	1	-1	-1	1	1	-1	-1	-1	-1	1	1	1	1	1	1	1	-1	1	1	-1
-1	1	-1	-1	-1	1	-1	-1	1	1	NA	1	-1	1	1	-1	-1	-1	-1	1	-1	1	-1	1	-1	-1	1	-1	-1	-1	-1	-1	-1	-1	-1	1	1	1	1	-1	-1	-1	-1	1	-1	-1	1	-1	-1	-1
-1	0	0	0	0	0	0	-1	0	0	NA	1	-1	NA	1	-1	0	NA	-1	1	1	1	-1	1	1	-1	1	-1	-1	NA	1	-1	-1	1	1	-1	-1	-1	-1	1	1	1	1	-1	NA	-1	1	-1	-1	NA
-1	-1	-1	-1	-1	1	-1	-1	1	-1	-1	1	-1	1	1	-1	-1	-1	-1	1	-1	1	-1	1	-1	-1	-1	1	-1	-1	1	-1	-1	1	1	-1	-1	-1	-1	1	1	1	1	1	1	1	-1	1	1	-1
-1	1	-1	-1	-1	1	-1	-1	1	-1	-1	1	-1	1	1	-1	-1	-1	-1	1	-1	1	-1	1	-1	-1	-1	1	-1	-1	1	-1	-1	1	1	-1	-1	-1	-1	1	1	1	1	1	1	1	-1	1	1	-1
-1	NA	-1	-1	-1	1	-1	-1	1	1	0	1	-1	1	1	-1	-1	-1	-1	1	-1	1	-1	1	-1	-1	-1	1	-1	-1	1	-1	-1	1	1	-1	-1	-1	-1	1	1	1	1	1	-1	-1	1	-1	-1	-1
-1	0	-1	-1	-1	1	-1	-1	1	-1	-1	1	-1	1	1	-1	-1	-1	-1	1	-1	1	-1	1	-1	-1	-1	1	-1	-1	1	-1	-1	1	1	-1	-1	-1	-1	1	1	1	1	1	1	1	-1	1	1	-1
-1	0	-1	-1	-1	1	-1	-1	0	NA	0	1	-1	NA	0	-1	-1	-1	-1	0	-1	1	-1	0	-1	-1	0	-1	-1	-1	NA	0	NA	0	0	0	0	0	0	-1	NA	-1	-1	0	NA	NA	1	-1	-1	-1
-1	-1	-1	-1	-1	1	-1	-1	1	-1	-1	1	-1	1	1	-1	-1	-1	-1	1	-1	1	-1	1	-1	-1	-1	1	-1	-1	1	-1	-1	1	1	-1	-1	-1	-1	1	1	1	1	1	1	1	-1	1	1	-1
-1	1	-1	-1	-1	1	-1	-1	1	-1	-1	1	-1	1	1	-1	-1	-1	-1	1	-1	1	-1	1	-1	-1	-1	1	-1	-1	1	1	NA	-1	-1	1	1	1	1	-1	-1	-1	-1	1	-1	-1	1	-1	-1	-1
-1	NA	-1	-1	-1	1	-1	-1	1	0	NA	1	-1	1	1	-1	-1	-1	-1	1	-1	1	-1	1	-1	-1	-1	1	-1	-1	1	-1	-1	1	1	-1	-1	-1	-1	1	0	0	0	1	0	NA	0	0	0	-1
-1	NA	-1	-1	-1	1	-1	-1	1	1	0	1	-1	1	1	-1	-1	-1	-1	1	-1	1	-1	1	-1	-1	0	-1	-1	-1	1	-1	-1	1	1	-1	-1	-1	-1	1	1	1	1	1	1	1	-1	1	1	-1
-1	-1	-1	-1	-1	1	-1	-1	1	-1	-1	1	-1	1	1	-1	-1	-1	-1	1	-1	1	-1	1	-1	-1	0	NA	-1	-1	1	-1	-1	1	1	-1	-1	-1	-1	1	1	1	1	1	1	1	-1	1	1	-1
-1	-1	-1	-1	-1	1	-1	-1	1	-1	-1	1	-1	1	1	-1	-1	-1	-1	1	-1	1	-1	1	-1	-1	1	1	-1	-1	0	-1	-1	-1	NA	1	NA	NA	NA	NA	NA	-1	-1	1	NA	0	1	-1	-1	-1
-1	-1	-1	-1	-1	1	-1	-1	1	NA	0	1	-1	1	1	-1	-1	-1	-1	1	-1	1	-1	1	-1	-1	-1	1	-1	-1	1	-1	-1	1	1	-1	-1	-1	-1	1	1	1	1	1	1	1	-1	1	1	-1
-1	1	-1	-1	-1	1	-1	-1	1	1	1	1	-1	1	1	-1	-1	-1	-1	1	-1	1	-1	1	-1	-1	-1	1	-1	-1	1	-1	-1	1	1	-1	-1	-1	-1	1	-1	-1	-1	1	-1	-1	1	-1	-1	-1
-1	-1	-1	-1	-1	1	-1	-1	1	-1	-1	1	-1	1	1	-1	-1	-1	-1	1	-1	1	-1	1	-1	-1	-1	1	-1	-1	1	-1	-1	1	1	-1	-1	-1	-1	1	1	1	1	1	1	1	-1	1	1	-1
-1	-1	-1	-1	-1	1	-1	-1	1	-1	-1	1	-1	1	1	-1	-1	-1	-1	1	-1	1	-1	1	-1	-1	-1	1	-1	-1	1	-1	-1	-1	-1	1	0	0	0	0	0	0	0	1	0	NA	0	0	0	-1
-1	-1	-1	-1	-1	1	-1	-1	1	-1	-1	1	-1	1	1	-1	-1	-1	-1	1	-1	1	-1	1	-1	-1	-1	1	-1	-1	1	-1	-1	1	1	-1	-1	-1	-1	1	1	1	1	1	1	1	0	0	NA	0
-1	-1	-1	-1	-1	1	-1	-1	1	-1	-1	1	-1	1	1	-1	-1	-1	-1	1	-1	1	-1	1	-1	-1	-1	1	-1	-1	1	-1	-1	1	1	-1	-1	-1	-1	1	1	1	1	1	1	1	-1	1	1	-1
-1	1	-1	-1	-1	1	-1	-1	1	1	1	1	-1	1	1	-1	-1	-1	-1	1	-1	1	-1	1	-1	-1	-1	1	-1	-1	1	-1	-1	NA	NA	NA	0	0	0	0	0	NA	0	1	1	1	-1	1	1	-1
-1	-1	-1	-1	-1	1	-1	-1	1	1	NA	1	-1	1	1	-1	-1	-1	-1	1	-1	1	-1	1	-1	-1	1	-1	-1	-1	1	-1	-1	1	1	-1	-1	-1	-1	1	1	1	1	1	1	1	-1	1	1	-1
-1	-1	-1	-1	-1	1	-1	-1	1	-1	-1	1	-1	1	1	-1	-1	-1	-1	1	-1	1	-1	1	-1	-1	0	0	-1	-1	1	-1	-1	-1	-1	1	1	1	1	-1	-1	-1	-1	1	-1	-1	1	-1	-1	-1
-1	1	-1	-1	-1	1	-1	-1	1	-1	-1	1	-1	1	1	-1	-1	-1	-1	1	-1	1	-1	1	-1	-1	-1	1	-1	-1	1	-1	-1	1	1	-1	-1	-1	-1	1	1	1	1	1	1	1	-1	1	1	-1
-1	0	-1	-1	-1	1	-1	-1	1	0	NA	1	-1	1	1	-1	-1	-1	-1	1	-1	1	-1	1	-1	-1	1	-1	-1	-1	1	-1	-1	1	1	-1	-1	-1	-1	1	1	1	1	1	1	1	-1	1	1	-1
-1	-1	-1	-1	-1	1	-1	-1	1	-1	-1	1	-1	1	1	-1	-1	-1	-1	1	-1	1	-1	1	-1	-1	-1	1	-1	-1	1	-1	-1	1	1	-1	-1	-1	-1	1	1	1	1	1	1	1	-1	1	1	-1
-1	-1	-1	-1	-1	1	-1	-1	1	-1	-1	1	-1	1	1	-1	-1	-1	-1	1	-1	1	-1	1	-1	-1	-1	1	-1	-1	1	-1	-1	1	1	-1	-1	-1	-1	1	1	1	1	1	1	1	-1	1	1	-1
-1	NA	-1	NA	-1	1	-1	-1	1	NA	NA	1	-1	1	1	-1	-1	-1	-1	NA	-1	1	-1	1	-1	-1	-1	NA	-1	-1	1	-1	-1	1	1	-1	-1	-1	-1	1	1	1	1	1	1	1	-1	1	1	-1
-1	-1	-1	-1	-1	1	-1	-1	1	-1	-1	1	-1	1	1	-1	-1	-1	-1	1	-1	1	-1	1	-1	-1	-1	1	-1	-1	1	-1	-1	1	1	-1	-1	-1	-1	1	1	1	1	1	1	1	-1	1	1	-1
-1	-1	-1	-1	-1	1	-1	-1	1	-1	-1	1	-1	1	1	-1	-1	-1	-1	1	-1	1	-1	1	-1	-1	-1	1	-1	-1	1	-1	-1	0	0	NA	0	0	0	0	0	0	0	1	1	1	-1	1	1	-1
-1	-1	-1	-1	-1	1	-1	-1	1	-1	-1	1	-1	1	1	-1	-1	-1	-1	1	-1	1	-1	1	-1	-1	-1	1	-1	-1	1	-1	-1	1	1	1	1	1	1	-1	-1	-1	-1	1	-1	-1	1	-1	-1	-1
-1	-1	-1	-1	-1	1	-1	-1	1	-1	-1	1	-1	1	1	-1	-1	-1	-1	1	-1	1	-1	1	-1	-1	-1	1	-1	-1	1	-1	-1	1	1	-1	-1	-1	-1	1	1	1	1	1	1	1	-1	1	1	-1
-1	0	-1	-1	-1	1	-1	-1	1	1	0	1	-1	1	1	-1	-1	-1	-1	1	-1	1	-1	1	-1	-1	0	-1	-1	-1	1	-1	-1	0	NA	0	NA	-1	-1	NA	0	NA	1	1	NA	NA	-1	1	0	-1
-1	-1	-1	-1	-1	1	-1	-1	1	-1	-1	1	-1	1	1	-1	-1	-1	-1	1	-1	1	-1	1	-1	-1	0	NA	-1	-1	1	-1	-1	1	1	-1	-1	-1	-1	1	NA	-1	-1	1	NA	0	1	-1	-1	-1
-1	-1	-1	-1	-1	1	-1	-1	1	-1	-1	1	-1	1	1	-1	-1	-1	-1	1	-1	1	-1	1	-1	-1	1	-1	-1	-1	1	-1	-1	1	1	-1	-1	-1	-1	1	1	1	1	1	1	1	-1	1	1	-1
-1	1	-1	-1	-1	1	-1	-1	1	1	1	1	-1	1	1	-1	-1	-1	-1	1	-1	1	-1	1	-1	-1	-1	1	-1	-1	1	-1	-1	1	1	-1	-1	-1	-1	1	1	1	1	1	1	1	-1	1	1	-1
-1	-1	-1	-1	-1	1	-1	-1	1	-1	-1	1	-1	1	1	-1	-1	-1	-1	1	-1	1	-1	1	-1	-1	-1	1	-1	-1	NA	-1	-1	1	1	-1	-1	-1	-1	1	1	1	1	1	1	1	-1	1	1	-1
-1	NA	0	0	NA	0	NA	0	1	-1	-1	1	-1	1	1	-1	-1	-1	-1	0	NA	0	0	0	NA	-1	NA	NA	-1	-1	NA	0	NA	0	NA	0	NA	NA	-1	NA	0	NA	1	1	NA	1	-1	1	1	-1
-1	1	-1	-1	-1	1	-1	-1	1	1	1	1	-1	1	1	-1	-1	-1	-1	1	-1	1	-1	1	-1	-1	1	-1	-1	-1	1	-1	-1	1	1	-1	-1	-1	-1	1	1	1	1	1	1	1	-1	1	1	-1
-1	0	-1	-1	-1	1	-1	-1	1	1	0	1	-1	1	1	-1	-1	-1	-1	1	-1	NA	-1	1	-1	-1	-1	1	-1	-1	1	-1	-1	1	1	-1	-1	-1	-1	1	1	1	1	1	1	1	-1	1	1	-1
-1	1	-1	-1	-1	1	-1	-1	1	1	1	1	-1	1	1	-1	-1	-1	-1	1	-1	1	-1	1	-1	-1	-1	1	-1	-1	1	-1	-1	1	1	-1	-1	-1	-1	1	1	1	1	1	1	1	-1	1	1	-1
-1	1	-1	-1	-1	1	-1	-1	1	1	1	1	-1	1	1	-1	-1	-1	-1	1	-1	1	-1	1	-1	-1	1	-1	-1	-1	-1	1	1	-1	-1	1	1	1	1	-1	-1	-1	-1	1	-1	-1	1	-1	-1	-1
1	-1	-1	-1	-1	1	1	1	-1	1	1	1	-1	1	-1	1	1	1	-1	1	1	1	-1	1	1	-1	1	-1	-1	1	1	-1	-1	1	1	-1	-1	-1	-1	1	1	1	1	-1	-1	-1	1	-1	-1	-1
-1	-1	-1	-1	-1	1	-1	-1	1	-1	-1	1	-1	1	1	-1	-1	-1	-1	1	-1	-1	1	-1	1	1	-1	1	-1	-1	1	-1	0	-1	-1	1	1	1	1	-1	-1	-1	-1	1	-1	-1	1	-1	-1	-1
-1	-1	-1	-1	-1	1	-1	-1	1	-1	-1	1	-1	1	1	-1	-1	-1	-1	1	-1	-1	1	-1	1	1	-1	1	-1	-1	1	-1	-1	-1	-1	1	1	1	1	-1	-1	-1	-1	1	-1	-1	1	-1	-1	-1
1	-1	-1	1	1	-1	1	-1	-1	-1	1	-1	-1	1	1	-1	-1	-1	-1	1	-1	-1	1	-1	1	1	-1	1	-1	-1	1	-1	0	-1	-1	1	1	1	1	-1	-1	-1	-1	1	-1	-1	1	-1	-1	-1
NA	-1	-1	0	0	0	NA	-1	0	-1	0	0	-1	1	1	-1	-1	-1	-1	1	-1	-1	1	-1	1	1	-1	1	-1	-1	1	-1	0	-1	-1	1	1	1	1	-1	-1	-1	-1	1	-1	-1	1	-1	-1	-1
1	-1	-1	1	1	-1	1	-1	-1	-1	1	-1	-1	1	1	-1	-1	-1	-1	1	-1	-1	1	-1	1	1	-1	1	-1	-1	1	-1	0	-1	-1	1	1	1	1	-1	-1	-1	-1	1	-1	-1	1	-1	-1	-1
-1	-1	-1	-1	-1	1	-1	-1	1	-1	-1	1	-1	1	1	-1	-1	-1	-1	1	-1	-1	1	-1	1	1	-1	1	-1	-1	1	-1	0	-1	-1	1	1	1	1	-1	-1	-1	-1	1	-1	-1	1	-1	-1	-1
0	-1	-1	0	0	0	0	-1	0	-1	0	0	-1	1	1	-1	-1	-1	-1	1	-1	-1	1	-1	1	1	-1	1	-1	-1	1	-1	0	-1	-1	1	1	1	1	-1	-1	-1	-1	1	-1	-1	1	-1	-1	-1
-1	1	-1	-1	-1	-1	1	-1	-1	-1	1	-1	1	1	1	-1	-1	-1	-1	1	-1	-1	1	-1	1	1	-1	1	-1	-1	1	-1	-1	-1	-1	1	1	1	1	-1	-1	-1	-1	1	-1	-1	1	-1	-1	-1
1	-1	-1	-1	-1	-1	1	1	1	-1	-1	1	1	1	1	-1	1	-1	-1	1	-1	1	-1	1	-1	-1	1	-1	-1	-1	-1	-1	-1	1	1	-1	-1	-1	-1	1	1	1	1	1	1	-1	1	-1	-1	-1
1	-1	-1	1	1	-1	1	-1	-1	-1	1	-1	1	1	1	-1	-1	-1	-1	1	-1	1	-1	1	-1	-1	1	-1	-1	-1	1	-1	-1	-1	-1	1	1	1	1	-1	-1	-1	-1	1	-1	-1	1	-1	-1	-1
1	-1	-1	-1	-1	-1	1	1	1	-1	-1	1	-1	1	1	-1	-1	-1	-1	1	-1	-1	1	-1	1	1	-1	1	-1	-1	1	-1	-1	-1	-1	1	1	1	1	-1	-1	-1	-1	1	-1	-1	1	-1	-1	-1
NA	-1	-1	NA	1	NA	NA	-1	-1	-1	NA	-1	1	1	1	-1	NA	-1	-1	1	-1	1	-1	1	-1	-1	1	-1	-1	-1	NA	-1	-1	-1	-1	1	1	1	1	-1	-1	-1	-1	1	-1	-1	1	-1	-1	-1
1	-1	-1	1	1	-1	1	-1	-1	-1	1	-1	1	1	1	-1	1	-1	-1	1	-1	1	-1	1	-1	-1	1	-1	-1	-1	-1	-1	-1	-1	-1	1	1	1	1	-1	-1	-1	-1	1	-1	-1	1	-1	-1	-1
1	-1	-1	1	1	-1	1	1	1	-1	-1	1	-1	1	1	-1	-1	-1	-1	1	-1	1	-1	1	-1	-1	1	-1	-1	-1	-1	-1	-1	-1	-1	1	1	1	1	-1	-1	-1	-1	1	-1	-1	1	-1	-1	-1
NA	-1	-1	-1	-1	NA	NA	NA	1	-1	-1	1	1	1	1	-1	-1	-1	-1	1	-1	1	-1	1	-1	-1	1	-1	-1	-1	1	-1	-1	-1	-1	1	1	1	1	-1	-1	-1	-1	1	-1	-1	1	-1	-1	-1
1	-1	-1	-1	-1	1	1	1	-1	-1	-1	1	-1	1	-1	-1	-1	1	1	1	1	1	-1	1	1	-1	1	-1	-1	1	1	-1	-1	1	1	-1	-1	-1	-1	1	1	1	1	-1	-1	-1	1	-1	-1	1
1	-1	-1	-1	-1	1	1	1	-1	1	1	1	-1	1	-1	1	1	1	-1	1	1	1	-1	1	1	-1	1	-1	-1	1	1	-1	-1	-1	-1	1	1	1	1	-1	-1	-1	-1	1	-1	-1	1	-1	-1	-1
1	-1	-1	1	1	-1	1	-1	-1	-1	1	-1	1	1	1	0	1	0	-1	1	NA	1	-1	1	1	-1	1	-1	-1	1	1	-1	-1	1	1	-1	-1	-1	-1	1	1	1	1	1	-1	-1	1	-1	-1	NA
1	-1	-1	-1	-1	1	1	1	-1	1	1	1	-1	1	-1	1	1	1	-1	1	1	1	-1	1	1	-1	1	-1	-1	1	1	-1	-1	-1	-1	1	1	1	1	-1	-1	-1	-1	1	-1	-1	1	-1	-1	-1
1	-1	-1	-1	-1	1	1	1	-1	1	1	1	-1	1	-1	NA	1	-1	-1	1	-1	1	-1	1	-1	-1	-1	1	1	1	1	-1	-1	1	1	-1	-1	-1	-1	1	NA	1	1	1	-1	-1	1	-1	-1	-1
1	-1	-1	1	1	-1	1	-1	-1	-1	1	-1	1	1	1	-1	1	1	1	-1	1	-1	1	-1	1	1	-1	1	-1	-1	1	NA	NA	-1	-1	1	1	1	1	-1	-1	-1	-1	1	-1	-1	1	-1	-1	-1
-1	-1	-1	-1	-1	1	-1	-1	1	-1	-1	1	-1	1	1	-1	-1	-1	-1	1	-1	-1	1	-1	1	1	-1	1	-1	-1	1	-1	-1	-1	-1	1	1	1	1	-1	-1	-1	-1	1	-1	-1	1	0	0	-1
NA	-1	-1	NA	NA	NA	0	-1	NA	-1	0	NA	NA	1	1	-1	0	0	0	0	NA	-1	1	-1	1	1	-1	1	0	0	1	-1	-1	-1	-1	1	1	NA	-1	1	-1	-1	-1	1	-1	-1	1	1	1	-1
-1	-1	-1	-1	-1	-1	1	-1	-1	-1	1	-1	1	1	1	-1	1	1	1	-1	1	-1	1	-1	1	1	-1	1	-1	-1	1	-1	-1	-1	-1	1	1	1	1	-1	-1	-1	-1	1	-1	-1	1	-1	-1	-1
-1	-1	-1	-1	-1	1	-1	-1	1	-1	-1	1	-1	1	1	-1	-1	-1	-1	1	-1	1	-1	1	-1	-1	1	-1	-1	-1	1	-1	-1	-1	-1	1	1	1	1	-1	-1	-1	-1	1	-1	-1	1	-1	-1	-1
0	-1	-1	0	0	0	0	-1	0	-1	0	0	0	1	1	-1	0	0	0	0	0	-1	1	-1	1	1	-1	1	1	1	1	1	1	-1	1	-1	-1	-1	-1	-1	-1	-1	-1	1	-1	-1	1	1	1	-1
1	-1	-1	1	1	-1	1	-1	-1	-1	1	-1	1	1	1	-1	1	1	1	-1	1	-1	1	-1	1	1	-1	1	1	1	1	-1	-1	-1	1	-1	-1	-1	-1	1	-1	-1	-1	1	-1	-1	1	1	1	-1
1	-1	-1	1	1	-1	1	-1	-1	-1	1	-1	1	1	1	-1	1	1	1	-1	1	-1	1	-1	1	1	-1	1	1	1	1	-1	-1	-1	-1	1	1	1	1	-1	-1	-1	-1	1	-1	-1	1	-1	-1	-1
-1	-1	-1	-1	-1	1	-1	-1	1	-1	-1	1	-1	1	1	-1	-1	-1	-1	1	-1	1	-1	1	-1	-1	1	-1	-1	-1	1	-1	-1	-1	-1	1	1	1	1	-1	-1	-1	-1	1	-1	-1	1	-1	-1	-1
1	-1	-1	-1	-1	-1	1	1	1	-1	-1	1	-1	1	1	-1	-1	1	-1	1	1	1	-1	1	1	-1	1	-1	-1	1	1	1	1	-1	-1	1	1	1	1	-1	-1	-1	-1	1	-1	-1	1	-1	-1	-1
-1	-1	-1	-1	-1	1	-1	-1	1	-1	-1	1	-1	1	1	-1	-1	-1	-1	1	-1	-1	1	-1	1	1	-1	1	-1	-1	1	-1	-1	-1	-1	1	1	1	1	-1	-1	-1	-1	1	-1	-1	1	-1	-1	-1
-1	1	-1	-1	-1	1	-1	-1	1	1	1	1	-1	1	1	-1	-1	-1	-1	1	-1	1	-1	1	-1	-1	1	-1	-1	-1	-1	1	1	-1	-1	1	1	1	1	-1	-1	-1	-1	1	-1	-1	1	-1	-1	-1
1	-1	-1	1	1	-1	1	-1	-1	-1	1	-1	1	1	1	-1	1	-1	-1	1	-1	1	-1	1	-1	-1	-1	1	1	1	-1	1	1	-1	-1	1	1	1	1	-1	-1	-1	-1	1	-1	-1	1	-1	-1	-1
1	-1	-1	1	1	-1	1	-1	-1	-1	1	-1	-1	1	1	-1	1	-1	-1	1	-1	1	-1	1	-1	-1	-1	1	1	1	-1	1	1	-1	-1	1	1	1	1	-1	-1	-1	-1	1	-1	-1	1	-1	-1	-1
1	-1	-1	1	1	-1	1	-1	-1	-1	1	-1	1	1	1	-1	1	-1	-1	1	-1	1	-1	1	-1	-1	-1	1	1	1	-1	1	1	-1	-1	1	1	1	1	-1	-1	-1	-1	1	1	1	-1	1	1	-1
1	-1	-1	-1	-1	1	1	1	-1	1	1	1	-1	1	-1	1	1	1	-1	1	1	1	-1	1	1	-1	1	-1	-1	1	1	-1	-1	1	1	-1	-1	-1	-1	1	1	1	1	-1	-1	-1	1	-1	-1	1
1	-1	-1	-1	-1	1	1	1	-1	1	1	1	-1	1	-1	1	1	1	-1	1	1	1	-1	1	1	-1	1	-1	-1	1	1	-1	-1	1	1	-1	-1	-1	-1	1	1	1	1	-1	-1	-1	1	-1	-1	1
1	-1	-1	-1	-1	1	1	1	-1	1	1	1	-1	1	-1	NA	1	1	-1	1	1	1	-1	1	1	-1	1	-1	-1	1	NA	0	NA	NA	1	-1	-1	-1	-1	1	0	1	1	-1	-1	-1	1	-1	-1	1
1	-1	-1	-1	-1	1	1	1	-1	1	1	1	-1	1	-1	1	1	1	-1	1	1	1	-1	1	1	-1	1	-1	-1	1	1	NA	1	-1	-1	1	NA	1	1	-1	-1	-1	-1	1	-1	-1	1	-1	-1	-1
0	-1	-1	NA	0	0	0	-1	0	-1	0	0	-1	1	1	-1	-1	-1	-1	1	-1	-1	1	-1	1	1	-1	1	-1	-1	1	-1	0	-1	-1	1	1	1	1	-1	-1	-1	-1	1	-1	-1	1	-1	-1	-1
1	-1	-1	1	1	-1	1	-1	-1	-1	1	-1	-1	1	1	-1	-1	-1	-1	1	-1	-1	1	-1	1	1	-1	1	-1	-1	1	-1	0	-1	-1	1	1	1	1	-1	-1	-1	-1	1	-1	-1	1	-1	-1	-1
-1	-1	-1	-1	-1	1	-1	-1	1	-1	-1	1	-1	1	1	-1	-1	-1	-1	1	-1	-1	1	-1	1	1	1	-1	-1	-1	1	-1	-1	-1	-1	1	1	1	1	-1	-1	-1	-1	1	-1	-1	1	-1	-1	-1
-1	-1	-1	-1	-1	-1	1	-1	-1	-1	1	-1	-1	1	1	-1	-1	1	1	-1	1	-1	1	-1	1	-1	1	-1	-1	-1	1	-1	-1	-1	-1	1	1	1	1	-1	-1	-1	-1	1	-1	-1	1	-1	-1	-1
-1	-1	-1	-1	-1	1	-1	-1	1	-1	-1	1	-1	1	1	-1	-1	-1	-1	1	-1	-1	1	-1	1	1	-1	1	-1	-1	1	-1	-1	-1	-1	1	1	1	1	-1	-1	-1	-1	1	-1	-1	1	-1	-1	-1
-1	-1	-1	-1	-1	1	-1	-1	1	-1	-1	1	-1	NA	1	-1	-1	-1	-1	1	-1	-1	1	-1	1	1	-1	1	-1	-1	1	-1	0	-1	-1	1	1	1	1	-1	-1	-1	-1	1	-1	-1	1	-1	-1	-1
1	-1	-1	-1	-1	1	1	1	-1	-1	-1	1	-1	1	-1	-1	-1	1	1	-1	1	-1	1	-1	1	-1	1	-1	-1	1	1	-1	-1	1	1	-1	-1	-1	-1	1	1	1	1	-1	-1	-1	1	-1	-1	1
1	-1	-1	-1	-1	1	1	1	-1	1	1	1	-1	1	-1	1	1	1	-1	1	1	1	-1	1	1	-1	1	-1	-1	1	1	-1	-1	1	1	-1	-1	-1	-1	1	1	1	1	-1	-1	-1	1	-1	-1	-1
1	-1	-1	-1	-1	1	1	1	-1	1	1	1	-1	1	-1	1	1	1	-1	1	1	1	-1	1	1	-1	1	-1	-1	NA	1	-1	-1	1	1	-1	-1	-1	-1	1	1	1	1	-1	-1	-1	1	-1	-1	-1
1	-1	-1	-1	-1	1	1	1	-1	1	1	1	-1	1	-1	1	1	1	-1	1	-1	1	-1	1	-1	-1	-1	1	1	1	0	NA	NA	-1	-1	1	0	0	0	0	NA	0	0	1	-1	-1	1	-1	-1	-1
1	-1	-1	1	1	-1	1	-1	-1	-1	1	-1	1	1	1	-1	-1	-1	-1	1	-1	-1	1	-1	1	1	-1	1	-1	-1	1	-1	-1	-1	-1	1	NA	1	NA	-1	-1	-1	-1	1	-1	-1	1	-1	-1	-1
1	-1	-1	1	1	-1	1	-1	-1	-1	1	-1	1	1	1	-1	1	1	1	-1	1	-1	1	-1	1	1	-1	1	1	1	1	-1	-1	-1	-1	1	1	1	1	-1	-1	-1	-1	1	-1	-1	1	-1	-1	-1
1	-1	-1	-1	-1	-1	1	1	1	-1	-1	1	-1	1	1	1	1	1	-1	1	1	1	-1	1	1	-1	1	-1	-1	1	1	-1	-1	-1	-1	1	1	1	1	-1	-1	-1	-1	1	-1	-1	1	-1	-1	-1
1	-1	-1	1	1	-1	1	-1	-1	-1	1	-1	1	1	1	-1	1	-1	-1	1	-1	1	-1	1	-1	-1	1	-1	-1	-1	-1	1	1	1	1	-1	-1	-1	-1	-1	-1	-1	-1	1	1	-1	1	-1	-1	-1
1	-1	-1	1	1	-1	1	-1	-1	-1	1	-1	1	1	1	-1	1	-1	-1	1	-1	1	-1	1	-1	-1	-1	1	1	1	-1	1	1	-1	-1	1	1	1	1	-1	-1	-1	-1	1	-1	-1	1	-1	-1	-1
-1	-1	-1	-1	-1	1	-1	-1	1	-1	-1	1	-1	1	1	-1	-1	-1	-1	1	-1	-1	1	-1	1	1	-1	1	-1	-1	1	-1	-1	-1	-1	1	1	1	1	-1	-1	-1	-1	1	-1	-1	1	-1	-1	-1
-1	-1	-1	-1	-1	1	-1	-1	1	-1	-1	1	-1	1	1	-1	-1	-1	-1	1	-1	-1	1	-1	1	1	-1	1	-1	-1	1	-1	-1	-1	-1	1	1	1	1	-1	-1	-1	-1	1	-1	-1	1	-1	-1	-1
1	-1	-1	-1	-1	1	1	1	-1	1	1	1	-1	1	-1	1	1	1	-1	1	1	1	-1	1	1	-1	1	-1	-1	1	1	-1	-1	1	1	-1	-1	-1	-1	1	1	1	1	-1	-1	-1	1	-1	-1	-1
1	-1	-1	-1	-1	1	1	1	-1	1	1	1	-1	1	-1	1	1	1	-1	1	1	1	-1	1	1	-1	1	-1	-1	1	1	-1	-1	1	1	-1	-1	-1	-1	1	1	1	1	-1	-1	-1	1	-1	-1	-1
1	-1	-1	-1	-1	1	1	1	-1	1	1	1	-1	1	-1	1	1	1	-1	1	1	1	-1	1	1	-1	1	-1	-1	1	1	-1	-1	1	1	-1	-1	-1	-1	1	1	1	1	-1	-1	-1	1	-1	-1	-1
1	-1	-1	1	1	-1	1	-1	-1	-1	1	-1	1	1	-1	1	1	1	-1	1	1	1	-1	1	1	-1	1	-1	-1	1	1	-1	-1	1	1	1	-1	-1	-1	1	1	1	1	1	-1	-1	1	-1	-1	-1
1	-1	-1	-1	-1	1	1	1	-1	1	1	1	-1	1	-1	1	1	1	-1	1	1	1	-1	1	1	-1	1	-1	-1	1	1	-1	-1	1	1	-1	-1	-1	-1	1	0	1	1	-1	-1	-1	1	-1	-1	1
1	-1	-1	-1	-1	1	1	1	-1	1	1	1	-1	1	-1	1	1	1	-1	1	1	1	-1	1	1	-1	1	-1	-1	1	1	-1	-1	1	1	-1	-1	-1	-1	1	1	1	1	-1	-1	-1	1	-1	-1	1
1	-1	-1	-1	-1	1	1	1	-1	1	1	1	-1	1	-1	1	1	1	-1	1	1	1	-1	1	1	-1	1	-1	-1	1	1	-1	-1	-1	-1	1	1	1	1	-1	-1	-1	-1	1	-1	-1	1	-1	-1	-1
-1	-1	-1	-1	-1	1	-1	-1	1	-1	-1	1	-1	1	1	-1	-1	-1	-1	1	-1	1	-1	1	-1	-1	1	-1	-1	-1	1	-1	-1	-1	-1	1	1	1	1	-1	-1	-1	-1	1	-1	-1	1	-1	-1	-1
[truncated: 1 more rows]
[truncated: 2,597 more columns]

## Sheet: tag_snps_transposed
			7	8	9	10	11	12	13	14	15	16	17	18	19	20	21	22	23	24	25	26	27	28	29	30	31	32	33	34	35	36	37	38	39	40	41	42	43	44	45	46	47	48	49	50	51	52	53
[truncated: 1,436 more rows]
[truncated: 354 more columns]

[truncated: 7 more sheets: tag_snps_final, half_tag_snps_transposed, half_tag_snps_final, quarter_tag_snps_transposed, quarter_tag_snps_final, eighth_tag_snps_transposed, eighth_tag_snps_final]
